# Supplementary material for: Effect of Climate on Volatile Metabolism in ‘Red Globe’ Grapes (Vitis vinifera L.) during Fruit Development
Source: MDPI journal article supplement (doi:10.3390/foods11101435), 2022-05-16
Supplement: s1 [file s1]

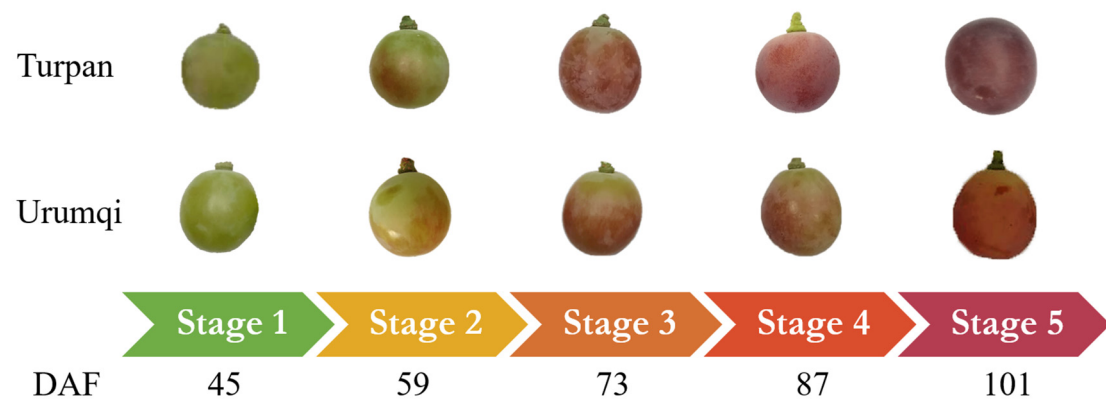

**Figure S1.** External profiles of selected grape berries. DAF: days after flowering.

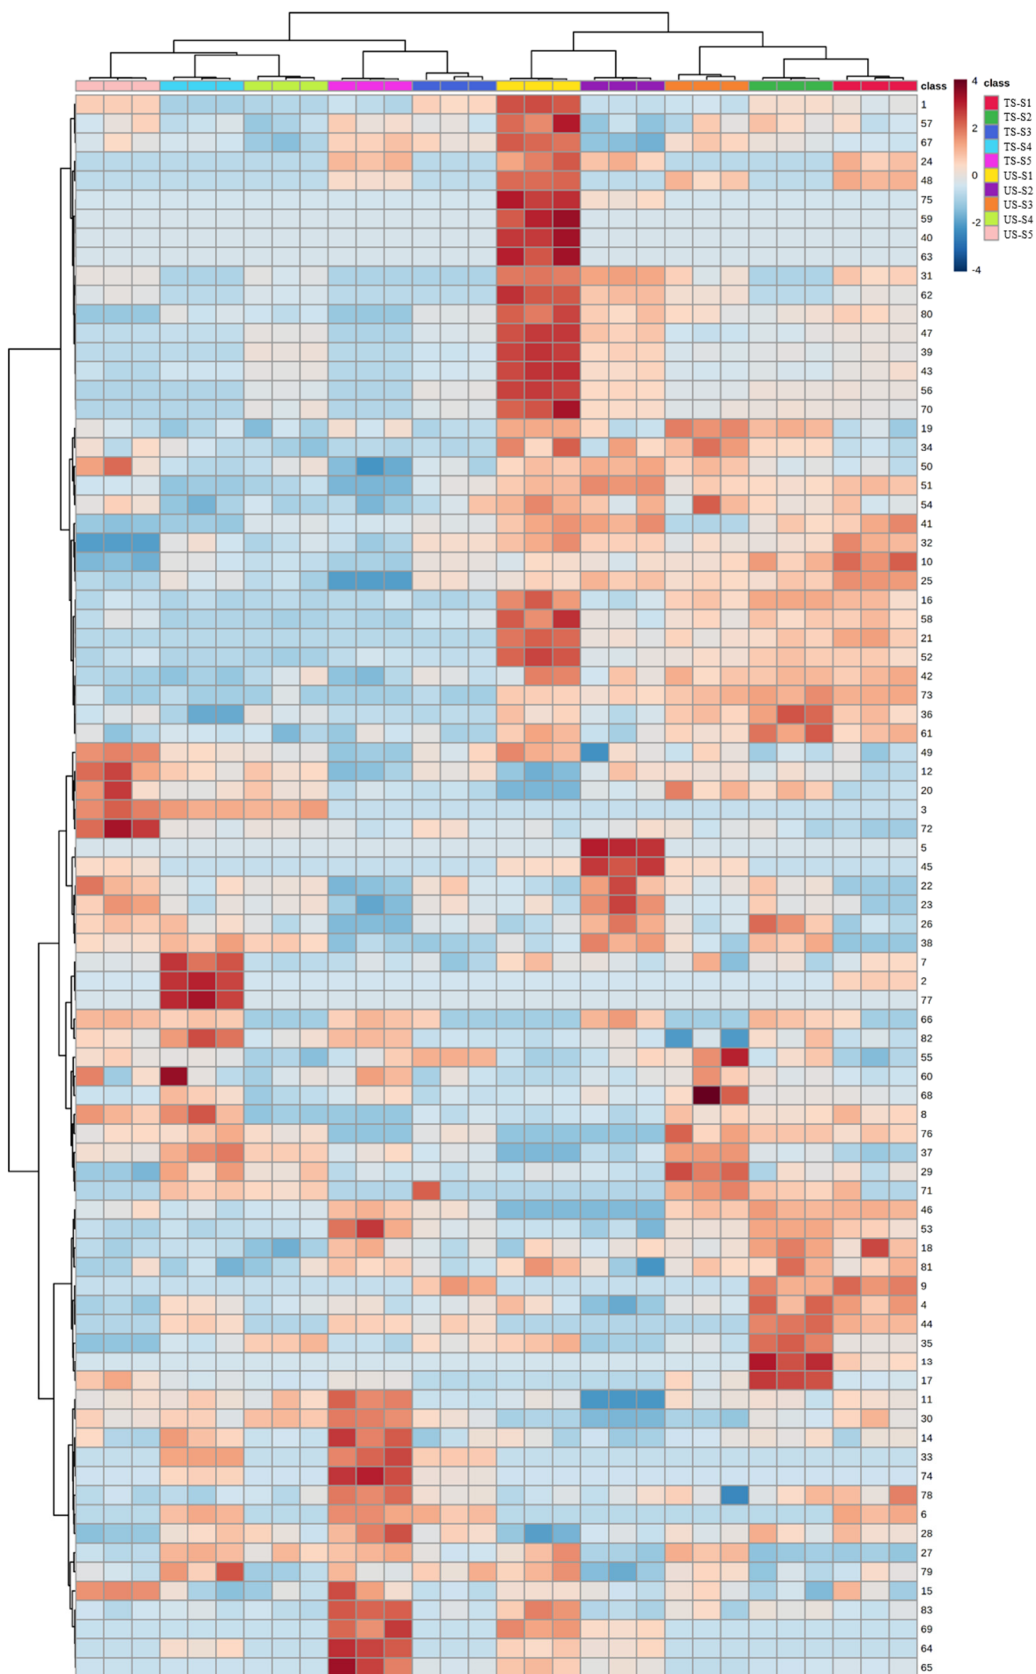

**Figure S2.** Heatmap and clusters of 83 volatiles in grape berries. Samples are labeled as 'TS-S1' to 'TS-S5' and 'US-S1' to 'US-S5', standing for grapes grown in Turpan or Urumqi (TS or US) and development stages (S1 to 5).

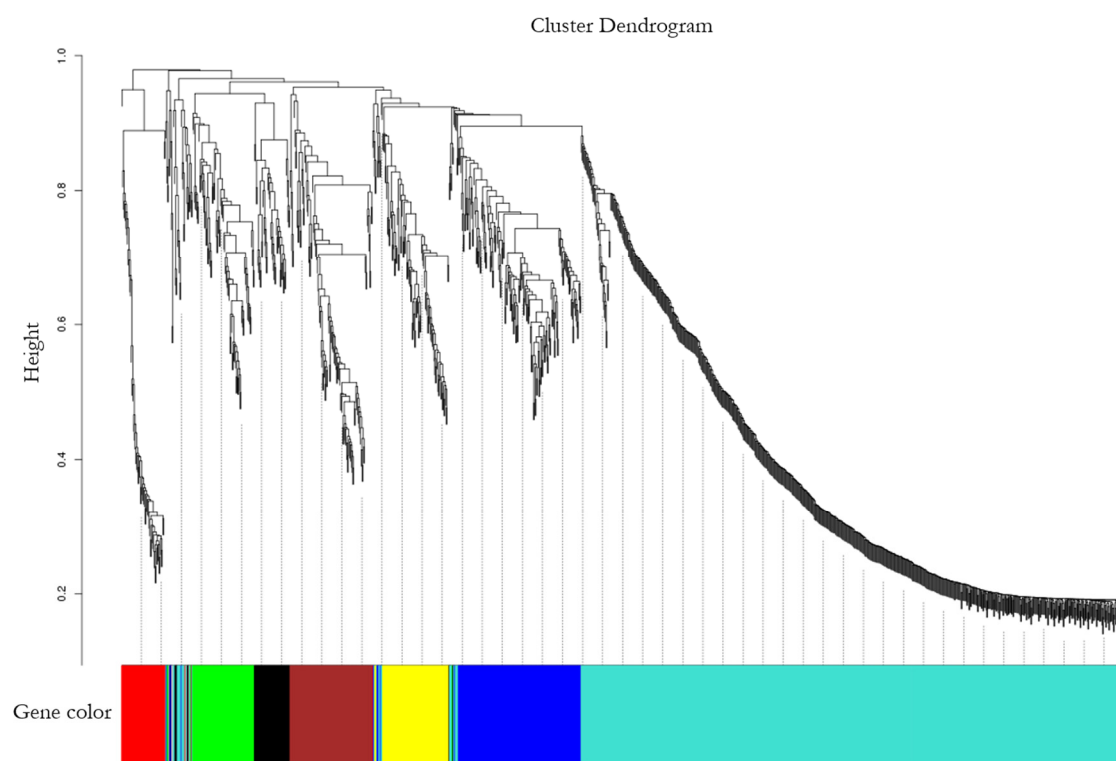

**Figure S3.** Cluster dendrogram.

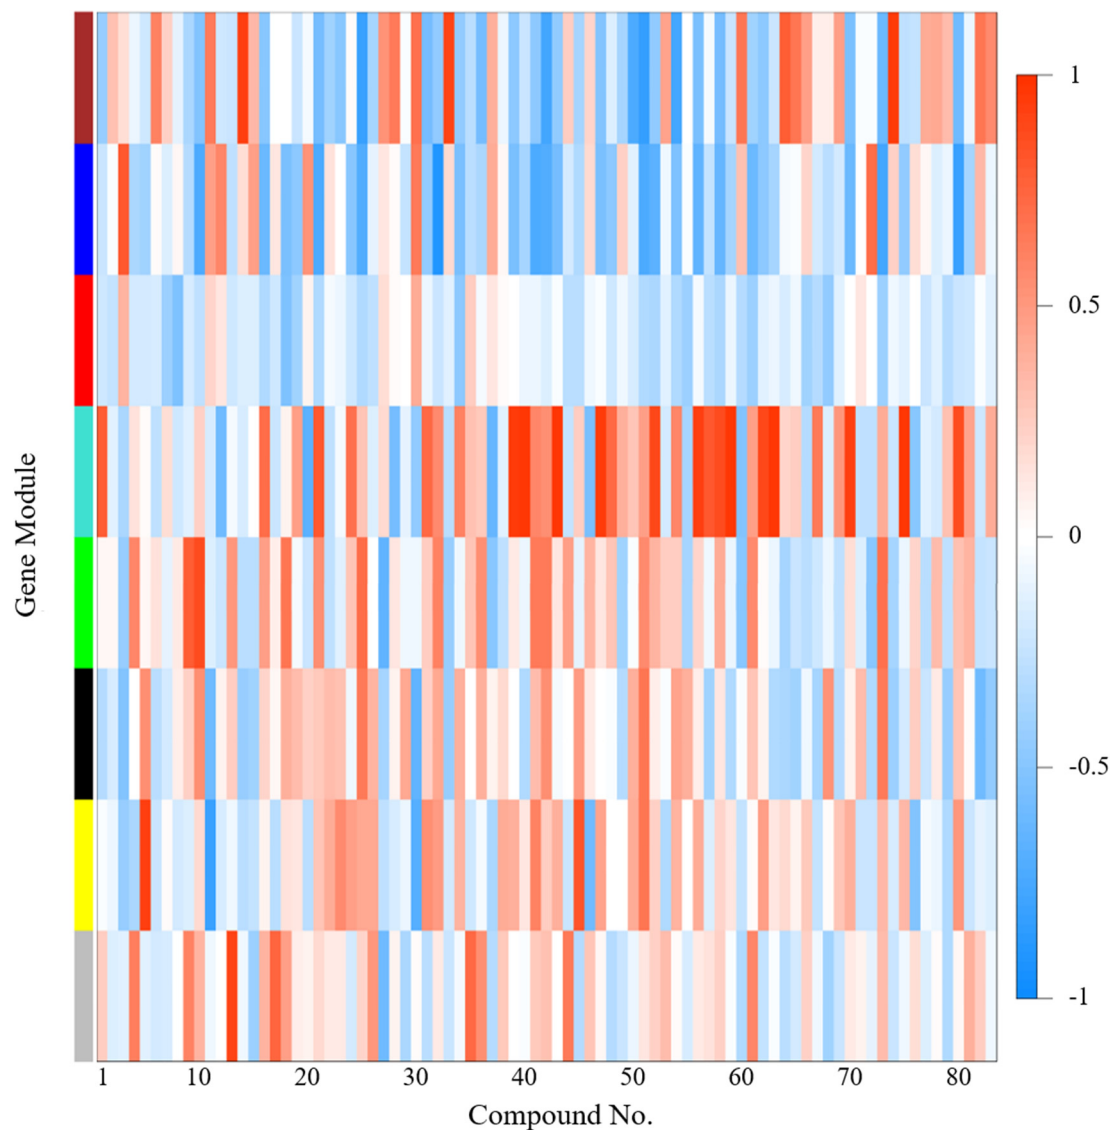

**Figure S4.** The correlation value among gene modules and volatiles. Volatiles were labeled by numbers consistent with Tables S2 and S3.

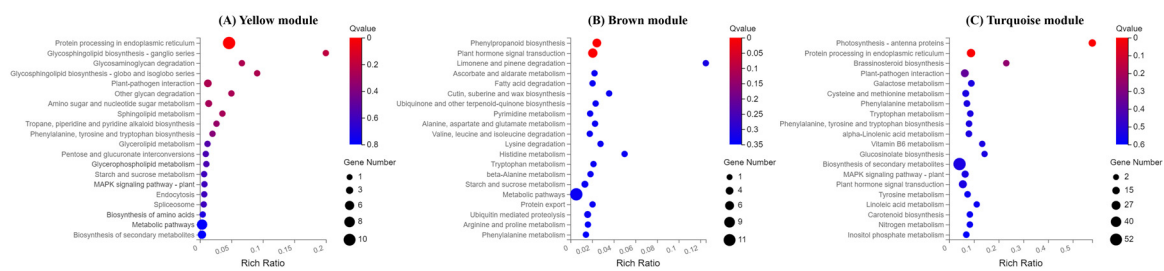

**Figure S5.** KEGG enrichment of three gene modules.
