# Supplementary material for: Effect of Climate on Volatile Metabolism in ‘Red Globe’ Grapes (Vitis vinifera L.) during Fruit Development
Source: MDPI journal article supplement (doi:10.3390/foods11101435), 2022-05-16
Supplement: s1 [file s1]

**Table S4.** Alignments of RNA-sequencing reads\*.

| Sample  | Total Raw Reads (M) | Total Clean Reads (M) | Total Clean Bases (Gb) | Total Mapping (%) | Uniquely Mapping (%) |
|---------|---------------------|-----------------------|------------------------|-------------------|----------------------|
| TS-S1-1 | 45.57               | 44.39                 | 6.66                   | 89.86             | 87.74                |
| TS-S1-2 | 45.57               | 44.45                 | 6.67                   | 89.06             | 86.53                |
| TS-S2-1 | 45.57               | 44.37                 | 6.66                   | 88.67             | 86.11                |
| TS-S2-2 | 45.57               | 44.57                 | 6.69                   | 88.64             | 86.13                |
| TS-S2-3 | 47.33               | 44.91                 | 6.74                   | 87.35             | 84.75                |
| TS-S3-1 | 45.57               | 44.28                 | 6.64                   | 87.63             | 84.82                |
| TS-S3-2 | 45.57               | 44.37                 | 6.66                   | 88.78             | 86.17                |
| TS-S3-3 | 45.57               | 44.45                 | 6.67                   | 88.65             | 85.89                |
| TS-S4-1 | 45.57               | 44.38                 | 6.66                   | 89.11             | 86.53                |
| TS-S4-2 | 45.57               | 44.49                 | 6.67                   | 89.19             | 86.69                |
| TS-S4-3 | 45.57               | 44.58                 | 6.69                   | 88.94             | 86.35                |
| TS-S5-1 | 45.57               | 44.38                 | 6.66                   | 90.1              | 87.74                |
| TS-S5-2 | 44.14               | 42.98                 | 6.45                   | 89.47             | 87.03                |
| TS-S5-3 | 45.57               | 44.24                 | 6.64                   | 87.11             | 82.92                |
| US-S1-1 | 45.57               | 44.58                 | 6.69                   | 91.23             | 88.79                |
| US-S1-3 | 45.57               | 44.6                  | 6.69                   | 89.97             | 87.74                |
| US-S2-1 | 47.33               | 44.99                 | 6.75                   | 85.91             | 82.99                |
| US-S2-2 | 41.12               | 40.25                 | 6.04                   | 77.33             | 73.58                |
| US-S2-3 | 45.57               | 44.25                 | 6.64                   | 85.06             | 82.49                |
| US-S3-1 | 45.57               | 44.36                 | 6.65                   | 87.62             | 84.96                |
| US-S3-2 | 45.57               | 44.24                 | 6.64                   | 88.24             | 85.69                |
| US-S3-3 | 45.57               | 44.3                  | 6.64                   | 86.74             | 83.59                |
| US-S4-1 | 45.57               | 44.36                 | 6.65                   | 85.74             | 83.26                |
| US-S4-2 | 45.57               | 44.38                 | 6.66                   | 85.28             | 82.67                |
| US-S4-3 | 45.57               | 44.25                 | 6.64                   | 87.09             | 84.38                |
| US-S5-1 | 45.57               | 44.18                 | 6.63                   | 86.12             | 83.67                |
| US-S5-2 | 45.57               | 44.24                 | 6.64                   | 85.45             | 82.83                |
| US-S5-3 | 45.57               | 44.08                 | 6.61                   | 85.95             | 83.33                |

\* TS: Turpan sample; US: Urumqi sample; S: stage
