# Supplementary material for: Effect of Climate on Volatile Metabolism in ‘Red Globe’ Grapes (Vitis vinifera L.) during Fruit Development
Source: MDPI journal article supplement (doi:10.3390/foods11101435), 2022-05-16
Supplement: s1 [file s1]

**Table S1.** Sequences and relative expression of validated genes (n = 3) \*.

| Gene ID   | Gene Name  | RNA seq Log <sub>2</sub> FC (FC>2, p<0.01, USvsTS) |       |       |       |       | Primers | Sequence (5'-3')     | Relative expression | S1            | S2            | S3            | S4            | S             |
|-----------|------------|----------------------------------------------------|-------|-------|-------|-------|---------|----------------------|---------------------|---------------|---------------|---------------|---------------|---------------|
|           |            | S1                                                 | S2    | S3    | S4    | S5    |         |                      |                     |               |               |               |               |               |
| 100253716 | UBI        |                                                    |       |       |       |       | Forward | AATCCAGCGATACCATCGAC | -                   | -             | -             | -             | -             | -             |
|           |            |                                                    |       |       |       |       | Reverse | CGAACCAGATGCAGAGTTGA | -                   | -             | -             | -             | -             | -             |
| 100264000 | WRKY47     | -2.32                                              |       |       |       |       | Forward | GGAGCACCAAGGAGCAGTTA | TS                  | 1.000±0.015   | 0.004±0.000   | 2.359±0.070   | 2.100±0.034   | 1.872±0.048   |
|           |            |                                                    |       |       |       |       | Reverse | GGTGGTACAGGATTGAGGGA | US                  | 0.308±0.017   | 0.838±0.049   | 1.799±0.025   | 1.749±0.087   | 2.078±0.067   |
| 100263252 | REVEILLE 1 | -2.65                                              | -2.11 |       | 1.08  |       | Forward | ACCAGTCCCCACATCAGTA  | TS                  | 1.003±0.057   | 2.720±0.050   | 1.637±0.046   | 3.992±0.065   | 8.344±0.188   |
|           |            |                                                    |       |       |       |       | Reverse | CGTTAAGACCGGGGATGGAG | US                  | 0.104±0.013   | 0.965±0.122   | 1.036±0.028   | 5.089±0.365   | 4.705±0.113   |
| 100243201 | LOB21      |                                                    | 2.62  | 1.56  |       |       | Forward | AGCTCCAACATGATCTCGCC | TS                  | 1.001 ± 0.033 | 0.366 ± 0.007 | 0.218 ± 0.023 | 0.059 ± 0.008 | 0.043 ± 0.007 |
|           |            |                                                    |       |       |       |       | Reverse | TTGATGGCCACAGGCTGATT | US                  | 2.184±0.033   | 3.351±0.098   | 0.382±0.040   | 0.118±0.014   | 0.033±0.002   |
| 100255943 | ERF003     | -3.82                                              | -2.34 | -1.72 |       |       | Forward | TTTCCTTTCGTCTTCTTCCA | TS                  | 1.009±0.093   | 5.269±0.289   | 13.52±0.136   | 11.80±0.283   | 5.113±0.368   |
|           |            |                                                    |       |       |       |       | Reverse | ATGTGCCGAGCCATATTCTA | US                  | 0.027±0.003   | 0.181±0.018   | 5.813±0.314   | 7.179±0.808   | 9.672±0.493   |
| 100244353 | ERF5       |                                                    | 1.33  | 2.96  |       |       | Forward | TTGTCGCAAACCTCAAGCCC | TS                  | 1.001±0.027   | 0.550±0.018   | 0.259±0.018   | 0.467±0.021   | 0.360±0.002   |
|           |            |                                                    |       |       |       |       | Reverse | AGATGCACAGTGAAGGTCGC | US                  | 1.272±0.089   | 0.638±0.013   | 0.983±0.092   | 0.245±0.025   | 0.041±0.007   |
| 100255447 | ERF62      |                                                    |       | 2.24  |       |       | Forward | CACAGCCCATGAAATACACG | TS                  | 1.002±0.049   | 1.011±0.128   | 0.906±0.049   | 2.374±0.039   | 1.720±0.038   |
|           |            |                                                    |       |       |       |       | Reverse | CCTGGTCCTGTTTCTCGGTA | US                  | 0.643±0.054   | 2.204±0.248   | 4.429±0.057   | 1.190±0.201   | 2.108±0.197   |
| 100852860 | bHLH36     |                                                    | -3.42 | -6.02 | -2.73 | 1.79  | Forward | AAGGGTTCGTCTGGAGGT   | TS                  | 1.008±0.090   | 0.149±0.011   | 0.330±0.032   | 0.281±0.025   | 0.737±0.066   |
|           |            |                                                    |       |       |       |       | Reverse | ATTTTAGCCACCTGTGCAT  | US                  | 0.218±0.059   | 0.712±0.042   | 0.012±0.001   | 0.304±0.046   | 0.258±0.021   |
| 100266006 | bHLH95     |                                                    | -3.31 | -2.39 | -1.50 | -1.35 | Forward | CGTTGTGGTGAGCATGTGTG | TS                  | 1.010±0.100   | 0.109±0.009   | 0.559±0.041   | 1.766±0.036   | 5.633±0.496   |
|           |            |                                                    |       |       |       |       | Reverse | TGGAGGAAATGTGGGCAGAC | US                  | 0.023±0.004   | 0.101±0.007   | 0.152±0.015   | 0.559±0.048   | 1.516±0.019   |
| 100258060 | HSFA-6b    | 3.02                                               |       | 1.01  | -3.76 |       | Forward | GTGGTCTCTTGAGCAGAGC  | TS                  | 1.013±0.114   | 0.401±0.010   | 0.396±0.066   | 0.910±0.047   | 1.025±0.120   |
|           |            |                                                    |       |       |       |       | Reverse | AGTGTGAGCTGCCTGACAA  | US                  | 0.912±0.013   | 0.982±0.132   | 0.479±0.065   | 0.190±0.007   | 0.240±0.027   |
| 100245740 | HSF30      | 2.88                                               |       |       | -2.31 |       | Forward | TCTTACCAGGCTTGCTCC   | TS                  | 1.001±0.034   | 1.121±0.165   | 0.964±0.050   | 1.459±0.114   | 0.794±0.125   |
|           |            |                                                    |       |       |       |       | Reverse | AGTCGGTTGCTGGGTCTTCC | US                  | 2.161±0.133   | 1.328±0.114   | 0.785±0.110   | 0.335±0.041   | 0.429±0.027   |
| 100258873 | bHLH34     | -1.14                                              | 1.19  |       | -2.27 |       | Forward | GCAGCCACCAAAGAATGAGC | TS                  | 1.003±0.054   | 3.326±0.047   | 4.895±0.140   | 5.777±0.069   | 0.931±0.094   |
|           |            |                                                    |       |       |       |       | Reverse | CACCCTTGACCTCTGAGCTG | US                  | 0.435±0.114   | 6.314±0.961   | 5.605±0.090   | 0.932±0.053   | 1.446±0.188   |
| 100264647 | ERF110     |                                                    |       |       | -4.86 | -6.66 | Forward | CGCCTGGCTTCTCCTTTACA | TS                  | 1.003±0.056   | 2.497±0.210   | 0.323±0.040   | 0.707±0.060   | 0.231±0.028   |
|           |            |                                                    |       |       |       |       | Reverse | TGCCGGAATATCTGCTCCAC | US                  | 1.253±0.041   | 1.569±0.143   | 0.334±0.045   | 0.035±0.002   | 0.040±0.001   |
| 100256849 | WRKY22     | 1.14                                               | 1.28  |       | -1.83 | -4.73 | Forward | AGAGCACAAACCACCTATGC | TS                  | 1.002±0.049   | 1.484±0.099   | 4.190±0.209   | 1.415±0.140   | 8.427±0.775   |
|           |            |                                                    |       |       |       |       | Reverse | CACGCTTGCTTTGCTGTA   | US                  | 0.830±0.102   | 2.032±0.430   | 1.350±0.061   | 0.119±0.016   | 0.076±0.011   |
| 100246583 | MYB-R      | 1.16                                               |       |       | -1.32 | -3.85 | Forward | ACCTCGACACCTATCCCACA | TS                  | 1.006±0.073   | 0.031±0.003   | 0.102±0.000   | 0.401±0.032   | 1.300±0.078   |

|           |       |      |      |      |       |      |         |                      |    |             |             |             |             |              |
|-----------|-------|------|------|------|-------|------|---------|----------------------|----|-------------|-------------|-------------|-------------|--------------|
| 100261077 | DnaJ  | 3.53 | 1.87 | 2.04 | -1.46 | 1.85 | Reverse | AGCCGCGCTCTATCAATGAA | US | 0.043±0.001 | ND          | 0.169±0.027 | 0.142±0.014 | 0.078±0.017  |
|           |       |      |      |      |       |      | Forward | ACGAACTCAATGGTGGACAG | TS | 1.006±0.079 | 1.239±0.046 | 2.833±0.270 | 7.490±0.257 | 1.785±0.145  |
|           |       |      |      |      |       |      | Reverse | ACTGGAAACAGCCACAAATC | US | 7.572±0.397 | 5.891±0.207 | 9.484±0.359 | 2.223±0.098 | 10.353±0.627 |
| 100252547 | PCC13 | 3.95 | 2.62 | 1.74 | 2.26  | 2.17 | Forward | CACGAACCCACTTCTCATAG | TS | 1.003±0.052 | 0.163±0.016 | 0.092±0.010 | 0.079±0.003 | 0.061±0.001  |
|           |       |      |      |      |       |      | Reverse | AGCTCGCTCATACAAATACG | US | 1.558±0.011 | 1.112±0.142 | 0.326±0.018 | 0.277±0.027 | 0.432±0.052  |

\* US: Urumqi sample; TS: Turpan sample; FC: fold change; S: stage.
