# Supplementary material for: Effect of Climate on Volatile Metabolism in ‘Red Globe’ Grapes (Vitis vinifera L.) during Fruit Development
Source: MDPI journal article supplement (doi:10.3390/foods11101435), 2022-05-16
Supplement: s1 [file s1]

**Table S2.** Detected volatiles and their structures.

| No. | Retention Time | Compound         | Structure                                                                             |
|-----|----------------|------------------|---------------------------------------------------------------------------------------|
| 1   | 3.66           | n-Hexane         |     |
| 2   | 5.50           | 3-Methylpentane  |     |
| 3   | 7.50           | Arginine         |     |
| 4   | 7.61           | Hexanal          |     |
| 5   | 7.84           | Undecane         |   |
| 6   | 10.20          | $\beta$ -Myrcene |   |
| 7   | 11.20          | D-Limonene       |  |
| 8   | 11.59          | 2-Heptynol       |   |
| 9   | 11.68          | Dihydrocarveol   |  |
| 10  | 12.07          | (E)-2-Hexenal    |   |

|    |       |                          |                                                                                      |
|----|-------|--------------------------|--------------------------------------------------------------------------------------|
| 11 | 12.50 | (E,E)-2,4-Nonadienal     | 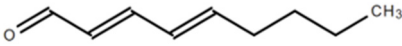   |
| 12 | 12.80 | 4,6-Dimethyldodecane     |    |
| 13 | 13.30 | Styrene                  |   |
| 14 | 14.12 | 2-Octanone               |    |
| 15 | 14.40 | Tridecane                |    |
| 16 | 15.27 | (E)-Hept-2-enal          |  |
| 17 | 16.21 | 1-Hexanol                |  |
| 18 | 17.25 | Nonanal                  |  |
| 19 | 17.58 | (E,E)-2,4-Hexadienal     |  |
| 20 | 17.71 | 2-Hexen-1-ol             |  |
| 21 | 18.22 | (E)-2-Octenal            |  |
| 22 | 18.37 | 2,6,10-Trimethyldodecane |  |

|    |       |                          |                                                                                       |
|----|-------|--------------------------|---------------------------------------------------------------------------------------|
| 23 | 18.52 | 2,6,11-Trimethyldodecane | 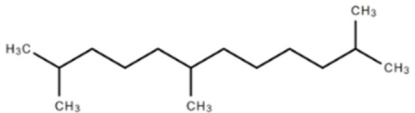    |
| 24 | 18.88 | 3-Octenol                |     |
| 25 | 19.28 | 2,4-Heptadienal          |     |
| 26 | 19.84 | 2,7,10-Trimethyldodecane |     |
| 27 | 19.98 | 4-Ethylcyclohexanol      |     |
| 28 | 20.05 | Decanal                  |    |
| 29 | 20.78 | Benzaldehyde             |  |
| 30 | 20.98 | 2-Nonenal                |   |
| 31 | 21.36 | Linalool                 |   |
| 32 | 22.22 | Hexadecyl chloride       |   |
| 33 | 22.27 | (E,Z)-2,6-Nonadienal     |   |
| 34 | 22.41 | 6-Methyltridecane        |   |

|    |       |                                  |                                                                                       |
|----|-------|----------------------------------|---------------------------------------------------------------------------------------|
| 35 | 23.33 | 2,6,10,15-Tetramethylheptadecane | 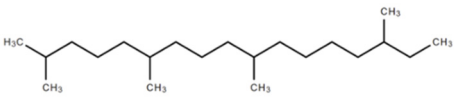    |
| 36 | 23.60 | 3-Heptylacrolein                 |     |
| 37 | 23.74 | Benzeneacetaldehyde              |    |
| 38 | 24.45 | 1-Iodoeicosane                   |     |
| 39 | 24.53 | $\alpha$ -Cadinene               |    |
| 40 | 24.88 | $\alpha$ -Terpineol              |   |
| 41 | 24.98 | Germacrene D                     |  |
| 42 | 25.13 | (6E)-8-Hydroxylinalool           |   |
| 43 | 25.36 | $\alpha$ -Muurolene              |  |
| 44 | 25.86 | Azulene                          |  |
| 45 | 25.86 | Naphthalene                      |  |
| 46 | 26.06 | 2-Undecenal                      |   |

|    |       |                                      |                                                                                       |
|----|-------|--------------------------------------|---------------------------------------------------------------------------------------|
| 47 | 26.11 | $\delta$ -Amorphene                  | 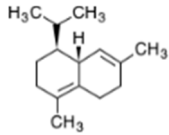   |
| 48 | 26.43 | (E,E)-2,4-Decadienal                 |     |
| 49 | 26.50 | Methyl N-hydroxybenzenecarboximidate |     |
| 50 | 27.45 | 2,5-Dimethylbenzaldehyde             |     |
| 51 | 27.58 | $\beta$ -Damascenone                 |    |
| 52 | 28.31 | (Z)-Geranylacetone                   |    |
| 53 | 28.40 | (E)-2-Dodecenal                      |   |
| 54 | 28.62 | Texanol                              |   |
| 55 | 28.70 | Kodaflex txib                        |   |
| 56 | 29.55 | $\alpha$ -Calacorene                 |  |
| 57 | 29.66 | 1-Octadecyne                         |   |
| 58 | 30.02 | $\beta$ -Ionone                      |  |

|    |       |                                                                                |                                                                                       |
|----|-------|--------------------------------------------------------------------------------|---------------------------------------------------------------------------------------|
| 59 | 30.80 | Phytol                                                                         | 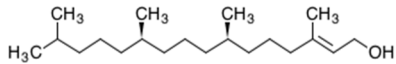    |
| 60 | 30.86 | (E)-2-Hexenoic acid                                                            |     |
| 61 | 31.10 | 1,6,6-Trimethyl-7-(3-oxobut-1-enyl)-3,8-dioxatricyclo[5.1.0.0(2,4)]octan-5-one |     |
| 62 | 31.40 | Glutaconic anhydride                                                           |    |
| 63 | 32.35 | Junenol                                                                        |    |
| 64 | 32.59 | 3-Hydroxy-4-methoxybenzonitrile                                                |    |
| 65 | 33.01 | Nonadecane                                                                     |   |
| 66 | 33.85 | Ethyl cinnamate                                                                |  |
| 67 | 34.22 | Olivetol                                                                       |   |
| 68 | 34.60 | Nonanoic acid                                                                  |   |
| 69 | 35.27 | Methyl palmitate                                                               |   |
| 70 | 35.48 | Cadalin                                                                        |  |

|    |       |                                             |                                                                                       |
|----|-------|---------------------------------------------|---------------------------------------------------------------------------------------|
| 71 | 36.57 | N,N-Diethyl-P-Tolamide                      | 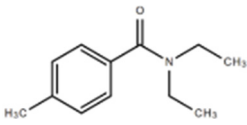    |
| 72 | 37.19 | 2,4-Di-tert-butylphenol                     |     |
| 73 | 37.64 | Dihydroactinidiolide                        |    |
| 74 | 37.72 | (-)-Copalol                                 |     |
| 75 | 38.70 | Coumaran                                    |    |
| 76 | 39.40 | $\beta$ -1,5-Dibenzoyl-2-deoxy-ribofuranose |    |
| 77 | 39.53 | Indole                                      |  |
| 78 | 40.05 | Dodecanoic acid                             |   |
| 79 | 40.91 | Diisobutyl phthalate                        |  |
| 80 | 41.44 | Vanillin lactoside                          |   |
| 81 | 43.32 | Butyl octyl phthalate                       |   |
| 82 | 44.08 | Imidazole, 2-amino-5-[(2-carboxy)vinyl]-    |   |

---

83

46.40

n-Hexadecanoic acid

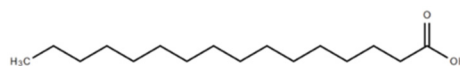

---

\* Structures could be referred to websites: [www.ichemistry.cn](http://www.ichemistry.cn) and [www.kegg.jp](http://www.kegg.jp).
