# Supplementary material for: Effect of Climate on Volatile Metabolism in ‘Red Globe’ Grapes (Vitis vinifera L.) during Fruit Development
Source: Foods. 2022 May 16;11(10):1435. doi: 10.3390/foods11101435 (PMC9140514; doi:10.3390/foods11101435)
Supplement: Supplementary file 1 [file foods-11-01435-s001.zip]

Archive with 9 entries (9 files):
- Figures S1-S5.pdf
- Table S1.pdf
- Table S2.pdf
- Table S3.xlsx
- Table S4.pdf
- Table S5.xlsx
- Table S6.xlsx
- Table S7.xlsx
- Table S8.xlsx
