# Supplementary material for: Effect of Climate on Volatile Metabolism in ‘Red Globe’ Grapes (Vitis vinifera L.) during Fruit Development
Source: Foods. 2022 May 16;11(10):1435. doi: 10.3390/foods11101435 (PMC9140514; doi:10.3390/foods11101435)
Supplement: Supplementary file 1 [file foods-11-01435-s001.zip › Table S3.xlsx]

## Sheet: Sheet1
Table S3. Information of detected volatiles (ng·kg-1)*.
NO.	Retention Time	Component	Classfication	TS-S1			TS-S2			TS-S3			TS-S4			TS-S5			US-S1			US-S2			US-S3			US-S4			US-S5
				TS-S1-1	TS-S1-2	TS-S1-3	TS-S2-1	TS-S2-2	TS-S2-3	TS-S3-1	TS-S3-2	TS-S3-3	TS-S4-1	TS-S4-2	TS-S4-3	TS-S5-1	TS-S5-2	TS-S5-3	US-S1-1	US-S1-2	US-S1-3	US-S2-1	US-S2-2	US-S2-3	US-S3-1	US-S3-2	US-S3-3	US-S4-1	US-S4-2	US-S4-3	US-S5-1	US-S5-2	US-S5-3
1	3.66	n-Hexane	Fatty acid derivative	54.4035	38.8133	46.6084	64.4714	64.6045	64.7375	76.6185	68.8567	72.7376	10.2265	10.0646	10.1455	22.7927	30.574	15.0113	150.321	153.317	147.326	26.8918	25.6184	26.2551	34.8375	30.2681	25.6988	16.9071	14.4451	15.6761	77.6689	77.5795	77.4902
2	5.5	3-Methylpentane	Fatty acid derivative	18.5529	20.603	19.578	0	0	0	0	0	0	52.9137	56.36	49.4673	0	0	0	0	0	0	0	0	0	0	0	0	0	0	0	0	0	0
3	7.497	Arginine	Fatty acid derivative	0	0	0	0	0	0	0	0	0	4.60325	4.07318	4.13983	0	0	0	0	0	0	0	0	0	0	0	0	3.81524	3.87075	4.53437	4.94809	5.98364	5.18512
4	7.61	Hexanal	Fatty acid derivative	305.452	264.03	310.527	275.941	348.795	348.174	197.616	206.132	226.274	243.423	238.835	219.947	228.869	220.319	178.918	277.133	237.07	191.151	114.153	149.174	138.142	216.77	211	197.524	195.699	180.348	207.858	159.389	170.446	148.332
5	7.84	Undecane	Fatty acid derivative	0	0	0	0	0	0	0	0	0	0	0	0	0	0	0	0	0	0	13.2671	12.8321	13.7984	0	0	0	0	0	0	0	0	0
6	10.2	β-Myrcene	Fatty acid derivative	5.87866	4.9312	5.61729	0	0	0	5.56498	4.36533	4.96515	4.79703	5.64086	5.21895	6.61231	6.58541	5.69543	0	0	0	0	0	0	0	0	0	0	0	0	0	0	0
7	11.2	D-Limonene	Terpenoid	38.8447	47.4558	48.1733	44.334	42.0027	31.8304	40.1903	27.2818	32.5214	75.7262	66.419	71.0726	40.0528	34.5061	35.9355	48.1482	54.5418	41.7547	40.039	35.2939	43.1159	56.8339	41.2576	25.6813	33.0213	35.0801	34.0507	40.6226	39.9717	41.4003
8	11.59	2-Heptynol	Fatty acid derivative	23.905	18.7547	20.1641	18.2756	18.2054	19.4935	13.9173	11.7685	14.1121	27.6226	32.2028	23.0424	8.36736	8.66926	8.40222	12.5993	11.8871	13.3116	11.0509	13.0272	13.8938	17.9087	22.6792	20.2939	9.61482	7.96343	8.78912	26.757	23.8803	21.0037
9	11.68	Dihydrocarveol	Terpenoid	7.43934	6.01001	6.72467	5.06423	6.67034	5.15279	4.14662	6.03271	5.21917	0	0	0	0	0	0	0	0	0	0	0	0	0	0	0	0	0	0	0	0	0
10	12.07	(E)-2-Hexenal	Fatty acid derivative	1769.7	1597.03	1822.65	1284.36	1565.63	1456.34	1100.73	1131.88	1090.49	1064.44	1052.26	943.054	777.702	764.627	735.352	1006.22	1231.02	1193.94	988.674	1198.6	1136.94	1166.37	1168.89	1252.51	926.695	887.195	881.265	593.362	637.426	549.298
11	12.5	(E,E)-2,4-Nonadienal	Fatty acid derivative	6.69238	6.27294	5.78773	5.90754	6.11757	4.41291	4.44749	4.51932	4.37565	5.93422	7.25179	5.97163	9.42119	10.5531	9.69862	4.94275	5.69999	5.32137	0	0	0	5.2255	6.42008	5.82279	7.87679	5.20932	6.54305	5.52414	5.88718	6.25021
12	12.8	4,6-Dimethyldodecane	Fatty acid derivative	24.0548	18.5685	19.218	26.4327	22.9407	23.7991	25.7176	24.3488	27.0865	29.9761	27.9683	24.3495	14.493	13.8091	17.5571	15.513	12.3677	13.9404	31.0003	26.7816	22.5629	25.5145	26.8567	26.1856	26.4227	30.7381	28.0345	39.9331	43.5539	34.0071
13	13.3	Styrene	Phenylpropanoid/benzenoid derivative	7.13571	3.98218	5.55895	16.6463	20.7253	19.1733	0	0	0	0	0	0	0	0	0	0	0	0	0	0	0	0	0	0	0	0	0	0	0	0
14	14.12	2-Octanone	Fatty acid derivative	17.5644	21.1113	21.1017	20.6292	21.3728	21.989	16.7833	18.7693	21.3211	25.8202	23.7577	22.6533	26.8977	30.0501	28.5709	21.7414	20.4658	17.5245	16.8488	17.4104	19.2473	19.4438	19.1994	20.6762	19.398	19.0359	18.9204	22.4016	17.9163	17.63
15	14.4	Tridecane	Fatty acid derivative	39.4179	32.2219	25.0259	29.9264	26.2036	22.4809	28.3377	29.1916	27.4838	33.5686	26.1105	23.2901	41.4838	48.8095	34.1581	33.9618	34.1331	34.3043	29.3702	28.0533	32.3761	36.0004	33.6403	31.2802	31.7715	24.6895	28.365	42.781	43.6776	43.2293
16	15.27	(E)-Hept-2-enal	Fatty acid derivative	18.0246	18.0703	13.8487	19.9561	19.8605	19.7648	6.16673	6.02689	6.99236	5.86821	7.5479	5.86706	6.57878	6.82055	8.52776	22.4062	26.2481	21.0472	6.78143	9.52621	8.30119	17.03	15.6499	14.2699	7.15828	6.60017	6.04205	6.50387	9.02676	7.93266
17	16.21	1-Hexanol	Fatty acid derivative	38.4026	41.3094	44.2162	272.431	282.348	262.514	12.4491	10.5102	14.388	56.605	42.3749	57.0415	71.7072	75.3384	68.0759	22.8712	20.9752	18.6387	11.5975	10.568	12.6269	47.8284	113.927	80.8775	36.6503	44.1527	40.7124	133.736	172.266	95.2055
18	17.25	Nonanal	Fatty acid derivative	34.9107	51.1216	39.5873	46.1575	42.9273	42.5301	31.5538	27.7187	32.5792	29.1251	29.3951	28.5175	41.915	39.6762	32.7626	25.109	37.0149	33.4307	33.5941	36.5876	30.4279	32.2077	34.2421	34.7212	21.5232	23.9069	26.2906	28.2417	26.1337	28.365
19	17.58	(E,E)-2,4-Hexadienal	Fatty acid derivative	31.8157	35.3739	28.2576	47.1137	45.2827	45.729	30.1681	32.0057	31.9704	27.6454	31.0133	34.3813	33.9737	39.5851	39.5331	47.6203	47.5883	47.6524	31.6084	33.3827	41.6917	50.199	52.4844	51.3417	33.9837	25.7459	29.8648	37.363	34.722	32.081
20	17.71	2-Hexen-1-ol	Fatty acid derivative	11.4886	13.0095	14.5304	35.3203	26.1509	29.6219	13.7001	15.1583	11.4614	21.1904	20.6548	24.8484	17.882	12.6014	15.2417	0	0	0	16.9996	20.4966	19.3965	27.0795	44.2711	35.6753	23.2951	31.8425	24.6288	40.5745	55.0676	26.0814
21	18.22	(E)-2-Octenal	Fatty acid derivative	11.4513	12.0406	8.35765	9.1326	6.73683	7.93472	0	0	0	0	0	0	0	0	0	14.8008	16.1913	15.4961	6.0662	4.17451	5.12035	4.73359	7.77049	6.25204	0	0	0	0	0	0
22	18.37	2,6,10-Trimethyldodecane	Fatty acid derivative	8.92246	8.97905	8.86587	14.7432	19.214	15.8091	15.9188	18.8028	13.0348	14.4177	12.2556	17.0881	7.73438	6.7239	8.74487	12.5731	11.1902	9.59577	28.1816	19.5058	22.2963	13.3862	16.7244	15.0553	15.3649	14.8514	16.1138	24.9983	20.5417	19.019
23	18.52	2,6,11-Trimethyldodecane	Fatty acid derivative	49.5394	37.593	37.9182	49.2043	58.7411	50.9156	50.6162	53.9984	47.234	50.4754	42.6256	51.111	29.3775	38.4383	33.9079	46.4247	53.7029	43.0136	80.843	69.285	69.4468	45.9539	47.4452	46.6996	50.897	48.4924	53.3015	58.0077	68.7562	66.7005
24	18.88	3-Octenol	Fatty acid derivative	5.98911	4.53278	5.26095	0	0	0	0	0	0	0	0	0	5.11674	5.54007	5.78469	6.31583	7.67812	9.0404	5.99325	4.24081	5.11703	0	0	0	0	0	0	0	0	0
25	19.28	2,4-Heptadienal	Fatty acid derivative	17.3976	16.9742	16.6993	13.7252	11.3215	13.0856	11.2614	11.4182	9.57595	10.3514	8.46323	9.4073	0	0	0	10.6654	12.7779	11.7216	13.2109	14.099	14.9871	12.6233	11.4865	12.0549	7.77921	6.96021	5.56598	6.5915	5.97282	6.28216
26	19.84	2,7,10-Trimethyldodecane	Fatty acid derivative	10.1509	12.8179	11.4844	20.5905	22.5162	17.2746	13.7149	13.2079	14.2219	18.1557	14.1378	15.7976	8.87055	8.82305	8.77555	10.861	11.7188	13.881	21.8411	19.0718	18.5359	11.6269	14.7184	13.1727	11.4771	14.0575	13.471	16.6875	17.9641	17.0609
27	19.98	4-Ethylcyclohexanol	Phenylpropanoid/benzenoid derivative	8.25436	8.81196	7.69676	8.06026	7.33994	8.78058	13.8917	11.7619	11.9533	19.3726	19.9937	18.7516	19.4444	18.3415	20.5473	14.875	18.6196	22.3643	9.20623	7.92188	9.56512	18.1479	20.1037	19.1258	19.2835	13.8546	16.569	11.4593	10.1572	10.418
28	20.05	Decanal	Fatty acid derivative	38.0218	31.7146	31.1094	32.9802	39.5557	27.8801	28.5153	34.8273	32.3446	30.8604	33.1171	36.8751	44.9278	37.9776	49.7859	19.0291	13.0787	16.0539	28.1456	24.929	26.3183	27.5084	31.8112	29.6598	29.9173	34.2924	25.5423	17.9716	19.5053	19.4033
29	20.78	Benzaldehyde	Phenylpropanoid/benzenoid derivative	83.0701	64.6252	79.2561	83.6249	60.6042	76.8909	71.8608	65.6675	73.2892	103.452	84.8987	105.906	72.3724	63.3054	67.8389	67.7568	75.078	72.3221	67.2711	64.0009	70.5413	113.154	125.014	119.084	79.4377	80.9643	94.691	55.6421	55.5661	48.0094
30	20.98	2-Nonenal	Fatty acid derivative	23.319	28.2199	18.4181	16.7712	18.3566	15.1857	22.4297	20.357	17.2691	24.1381	24.213	17.17	34.6471	35.3083	33.1234	9.94694	11.0178	10.7079	5.08604	5.29344	5.50083	10.0682	10.4958	7.56468	27.733	26.6395	25.2281	24.3033	18.5177	19.7208
31	21.36	Linalool	Terpenoid	10.5747	8.44254	9.50864	0	0	0	0	0	0	0	0	0	0	0	0	16.5675	16.849	16.2859	13.8146	13.1893	13.5019	4.47042	9.39479	6.93261	4.0307	5.44638	5.02153	5.9379	5.76845	5.69143
32	22.22	Hexadecyl chloride	Fatty acid derivative	19.1234	16.3788	15.6977	11.8213	10.9713	12.6712	12.3381	12.3756	12.3005	10.2368	11.8027	8.67082	5.1563	7.9406	6.54845	14.9823	16.6543	18.8488	13.8006	13.8456	13.8906	12.6375	10.0036	11.3206	7.80343	6.35966	9.2472	0	0	0
33	22.27	(E,Z)-2,6-Nonadienal	Fatty acid derivative	0	0	0	0	0	0	4.36939	4.56914	4.46926	6.23521	6.36234	6.29878	8.48386	7.41836	9.54935	0	0	0	0	0	0	0	0	0	0	0	0	0	0	0
34	22.41	6-Methyltridecane	Fatty acid derivative	7.47211	7.92302	7.0212	10.6555	10.8051	10.7303	7.26288	6.80672	7.0348	9.18415	8.11404	7.21544	7.14364	6.94144	6.73925	14.5395	10.8236	15.9901	13.5133	10.7738	7.45471	15.274	12.1037	13.6889	6.30336	7.28134	5.38068	10.0319	7.13276	10.5345
35	23.33	2,6,10,15-Tetramethylheptadecane	Fatty acid derivative	22.786	22.5413	23.0308	53.7554	50.4479	47.1405	28.1245	21.4811	27.1273	17.6802	14.8623	20.4981	14.9894	14.4763	10.6242	31.2885	34.2347	38.7989	9.17729	8.89834	7.45384	20.3946	19.1598	14.0284	33.0499	32.3718	37.3084	4.10665	4.75167	4.42916
36	23.6	3-Heptylacrolein	Fatty acid derivative	24.9935	27.696	22.2911	40.4701	31.1164	38.1653	10.8593	12.0276	11.4434	0	0	0	12.419	12.1322	11.8454	26.9803	20.4044	23.6924	11.1516	15.6846	15.561	27.4773	25.4123	23.3473	15.6418	18.64	17.1409	13.8976	16.3595	17.9724
37	23.74	Benzeneacetaldehyde	Phenylpropanoid/benzenoid derivative	20.1262	12.7691	16.4476	32.2418	35.005	37.0493	30.3414	36.5667	33.4541	68.219	78.4582	84.1243	42.0285	32.9584	51.0986	4.60825	5.08835	4.60979	18.9433	31.104	25.0237	74.4729	73.2051	75.7407	56.0806	55.5081	55.7943	46.3265	43.7006	41.0747
38	24.45	1-Iodoeicosane	Fatty acid derivative	5.12807	5.24146	5.35485	10.9638	11.7938	12.6238	5.35999	5.74789	6.13579	11.9847	10.8471	13.1224	6.78744	4.88818	5.83781	8.55618	6.66599	7.61109	12.2312	13.2602	14.1654	7.65202	9.62608	5.67796	11.1523	10.7496	10.3469	10.2121	9.56602	9.91302
39	24.53	α-Cadinene	Terpenoid	16.3867	19.3407	17.2661	16.8608	15.3233	13.7858	9.82201	9.5801	10.9586	5.46427	4.86765	4.27102	4.32581	4.59258	4.45919	63.2174	67.1017	65.1596	29.3171	28.0276	26.6694	15.6723	12.6365	13.7648	18.8594	20.2003	20.2541	5.67883	4.72091	5.19987
40	24.88	α-Terpineol	Terpenoid	0	0	0	0	0	0	0	0	0	0	0	0	0	0	0	8.00688	7.95263	9.28507	0	0	0	0	0	0	0	0	0	0	0	0
41	24.98	Germacrene D	Terpenoid	53.836	64.4343	72.4581	56.0221	43.1929	49.8975	41.2409	38.7014	39.4925	21.9201	22.4446	20.369	35.4327	33.5399	35.6582	55.9862	64.8693	69.9464	61.2097	71.3685	66.2638	26.4382	27.6214	27.0298	36.283	37.2026	38.654	20.7776	17.8764	18.6776
42	25.13	(6E)-8-Hydroxylinalool	Terpenoid	29.0501	30.5792	31.6198	30.7921	29.4421	30.6069	25.7678	24.9689	22.9345	19.3407	21.082	19.873	18.7022	19.389	21.9767	24.3589	34.4046	34.0968	29.7748	25.8571	23.839	27.7959	31.4139	29.6049	24.3994	22.1597	26.7896	21.9329	21.3636	20.7159
43	25.36	α-Muurolene	Terpenoid	11.2743	12.1784	15.4615	7.7809	9.48797	7.09052	6.07679	6.24449	7.14813	5.81781	5.42802	5.62291	0	0	0	45.6028	49.3614	50.0944	16.8413	19.3751	16.9121	7.02686	7.51301	7.26993	10.5049	11.1384	12.0078	0	0	0
44	25.86	Azulene	Terpenoid	10.3405	9.31959	9.63319	13.7963	12.9333	14.6593	4.3667	8.10217	6.23444	7.24794	7.96497	6.53092	7.74337	8.11587	7.37086	0	0	0	0	0	0	0	0	0	0	0	0	0	0	0
45	25.86	Naphthalene	Terpenoid	0	0	0	0	0	0	0	0	0	0	0	0	0	0	0	6.37706	6.52678	6.6765	16.9337	18.9453	19.0679	6.47345	6.56671	6.65997	0	0	0	6.61314	7.22382	5.83088
46	26.06	2-Undecenal	Fatty acid derivative	33.34	34.111	32.569	33.0673	37.5691	32.3184	21.8482	23.1665	17.407	13.9553	16.623	11.2876	33.5212	31.2158	28.9105	0	0	0	0	0	0	30.9973	26.9911	28.9942	15.5119	14.4293	16.5945	17.1276	19.1406	24.7524
47	26.11	δ-Amorphene	Terpenoid	31.6456	28.9002	30.2729	19.3747	21.3822	27.612	20.4633	21.1884	23.4343	11.1025	10.5981	10.8503	0	0	0	102.132	109.989	110.804	47.1341	53.6012	54.8354	11.64	16.2835	13.9617	26.8329	28.8212	27.9008	9.79055	8.98654	9.38855
48	26.43	(E,E)-2,4-Decadienal	Fatty acid derivative	7.46319	6.68999	7.07659	0	0	0	0	0	0	0	0	0	4.2225	4.45327	4.33788	10.3284	10.2903	10.5807	0	0	0	4.76176	6.97389	5.86782	0	0	0	0	0	0
49	26.5	Methyl N-hydroxybenzenecarboximidoate	Phenylpropanoid/benzenoid derivative	8.23322	4.16704	6.20013	7.31438	4.66732	5.99085	8.82635	7.37458	10.2781	9.53437	9.99251	9.07624	4.7134	4.04428	4.37884	14.448	12.5329	11.796	9.59189	8.23371	8.9128	10.4387	6.66669	8.55267	7.92002	8.64517	8.28259	13.949	14.6702	14.3096
50	27.45	2,5-Dimethylbenzaldehyde	Phenylpropanoid/benzenoid derivative	222.602	236.551	210.149	228.441	246.448	239.571	227.282	235.279	199.392	218.098	205.406	204.578	144.219	177.703	161.967	266.609	286.581	277.728	292.595	304.563	298.026	291.312	271.198	281.255	237.005	213.234	249.905	307.424	340.723	252.81
51	27.58	β-Damascenone	Terpenoid	77.6008	80.4298	75.3419	60.4858	66.0263	65.5368	43.8178	51.0962	53.5225	17.0802	21.9578	20.8507	10.153	9.66221	10.6437	72.8434	81.2662	79.6692	95.7889	98.0462	99.4075	73.1779	54.0879	68.17	29.856	26.3223	37.6522	40.102	41.0443	44.1841
52	28.31	(Z)-Geranylacetone	Terpenoid	62.4217	63.0557	55.9014	66.2374	62.9503	62.2626	35.7903	34.0916	35.6708	29.9963	30.5762	31.156	40.2705	33.3687	36.6506	93.35	102.051	96.9517	42.8797	48.0627	43.6419	55.8808	49.3652	52.623	26.1132	29.066	27.4078	29.9173	35.0718	39.5419
53	28.4	(E)-2-Dodecenal	Fatty acid derivative	15.2516	14.8414	13.1442	17.5278	17.5955	17.5616	12.5097	10.9859	11.7386	9.9638	8.553	9.2584	23.5265	20.371	17.2154	9.78386	9.86334	9.94282	9.49072	5.62933	7.56002	12.7362	12.8773	12.8068	9.70141	9.65981	10.3099	9.74758	8.58097	8.19641
54	28.62	Texanol	Fatty acid derivative	17.1048	13.6364	14.148	14.8808	16.0878	15.1972	12.5995	13.9336	16.9916	11.126	10.2037	12.0483	10.3554	12.5634	11.3497	17.6395	19.4464	17.8782	13.9181	17.9043	16.8731	20.9392	13.9543	17.4467	11.8972	13.5382	12.0796	14.4888	16.4583	15.2065
55	28.7	Kodaflex txib	Fatty acid derivative	12.9812	10.4239	13.9652	20.5934	16.006	23.2349	25.4089	25.6619	25.1559	18.4026	18.7855	18.0197	18.0297	15.5274	22.7518	15.6323	12.9766	13.3815	18.8296	21.8727	15.5959	28.1667	20.3038	36.0297	13.9514	13.112	10.6907	20.6079	22.4217	18.7941
56	29.55	α-Calacorene	Terpenoid	7.69154	6.83486	6.94889	7.20888	7.48959	7.03112	6.65131	5.93111	6.29121	0	0	0	0	0	0	23.926	24.5307	23.7822	10.383	9.76899	9.89779	5.36535	5.32021	5.34278	5.67693	5.49884	5.11302	0	0	0
57	29.66	1-Octadecyne	Fatty acid derivative	10.6095	7.82492	8.47556	10.6916	11.9668	9.41631	9.19304	9.53897	8.23979	7.65798	8.09645	8.88056	9.75581	11.4352	10.3072	15.2346	14.1494	17.9485	8.15679	5.90919	6.07944	11.5459	7.27044	9.40818	7.05894	6.28162	8.00296	8.45748	9.65276	11.2252
58	30.02	β-Ionone	Terpenoid	52.7944	59.3996	48.8085	47.5439	56.2888	54.551	28.7973	29.1744	33.5383	19.2122	21.2881	21.1875	20.8651	22.4818	19.4415	85.637	72.5388	96.7187	38.1805	29.0534	39.6285	49.772	43.594	39.1658	18.3655	21.2122	19.8385	25.1579	36.2896	32.8046
59	30.8	Phytol	Terpenoid	0	0	0	0	0	0	0	0	0	0	0	0	0	0	0	5.35165	6.51622	7.19508	0	0	0	0	0	0	0	0	0	0	0	0
60	30.86	(E)-2-Hexenoic acid	Fatty acid derivative	4.71719	4.50025	4.60872	4.89511	5.26479	5.07995	4.09602	5.14962	4.62282	8.63853	5.11151	4.40007	6.58227	4.99873	6.14691	4.37574	4.33416	4.35495	4.54818	5.04585	4.79702	6.771	5.13238	5.79709	4.84309	4.06307	5.15729	6.96005	3.99599	5.47802
61	31.1	1,6,6-Trimethyl-7-(3-oxobut-1-enyl)-3,8-dioxatricyclo [5.1.0.0(2,4)]octan-5-one	unknown	8.22845	8.9984	9.4666	9.71911	10.9089	11.4605	7.23355	5.61644	5.73544	6.77441	6.58457	6.39473	7.36562	5.19881	6.55364	8.59248	9.7598	9.17614	5.52569	7.28466	6.40517	7.76818	8.39475	8.08147	4.66616	6.59092	5.86068	7.14823	4.97473	6.06148
62	31.4	Glutaconic anhydride	Fatty acid derivative	5.23313	6.87417	6.05365	0	0	0	0	0	0	0	0	0	0	0	0	29.4402	25.2815	25.3182	14.5271	14.6099	12.8556	8.26932	8.80058	8.53495	3.76831	4.41893	4.09362	5.02218	6.53088	5.77653
63	32.35	Junenol	Terpenoid	0	0	0	0	0	0	0	0	0	0	0	0	0	0	0	6.77394	5.63279	7.28423	0	0	0	0	0	0	0	0	0	0	0	0
64	32.59	3-Hydroxy-4-methoxybenzonitrile	Phenylpropanoid/benzenoid derivative	0	0	0	0	0	0	0	0	0	5.47589	4.668	6.15039	16.6146	18.0502	15.179	6.82616	5.82813	7.82419	4.98396	6.37125	4.46569	0	0	0	0	0	0	0	0	0
65	33.01	Nonadecane	Fatty acid derivative	14.4581	11.0313	16.3003	8.05136	6.43644	8.90839	18.9641	13.3548	18.3623	6.87846	6.66501	7.09191	133.671	165.573	101.77	61.4336	68.3629	54.5043	33.5924	27.5264	23.5881	0	0	0	5.8307	6.34959	6.2448	6.62235	5.37686	4.97524
66	33.85	Ethyl cinnamate	Phenylpropanoid/benzenoid derivative	0	0	0	4.60698	5.09349	4.12047	0	0	0	4.16356	4.59878	4.38117	5.04784	4.16196	4.6049	0	0	0	5.89035	4.23485	5.0626	0	0	0	0	0	0	4.9851	5.10542	4.75638
67	34.22	Olivetol	Phenylpropanoid/benzenoid derivative	9.26074	9.26213	8.94415	10.768	11.0665	10.108	12.6599	10.8684	11.2697	9.43918	9.72614	9.15222	12.7017	12.7844	13.6951	18.5894	18.0479	17.4779	5.85776	4.9508	6.19378	13.4023	11.6295	12.5159	5.88902	6.69842	7.66052	9.62499	12.1914	10.3298
68	34.6	Nonanoic acid	Fatty acid derivative	10.1754	9.49072	8.80599	10.2322	10.0163	10.448	6.44949	8.44614	7.44781	15.2335	13.5301	11.8268	11.1222	8.60467	12.3926	7.64247	8.65362	8.14804	8.61593	8.23766	10.9851	30.1386	12.2802	21.2094	6.45789	4.65521	7.15016	7.78437	7.54051	8.02824
69	35.27	Methyl palmitate	Fatty acid derivative	0	0	0	0	0	0	0	0	0	0	0	0	10.1224	12.3972	14.6721	10.5629	8.86789	9.71541	4.56448	5.46651	5.01549	0	0	0	0	0	0	0	0	0
70	35.48	Cadalin	Phenylpropanoid/benzenoid derivative	5.55227	5.03387	4.77469	6.48574	5.53809	5.71698	4.10732	4.93112	4.24161	0	0	0	0	0	0	17.3821	18.3557	23.1423	7.70701	7.55455	7.78574	4.45368	4.37693	5.73697	4.09283	5.0595	6.03923	0	0	0
71	36.57	N,N-Diethyl-P-Toluamide	Phenylpropanoid/benzenoid derivative	0	0	0	5.10488	5.4302	4.67673	0	0	0	5.68615	4.84487	5.26551	0	0	0	0	0	0	0	0	0	7.33232	6.59385	8.07078	3.99829	4.51021	5.02214	0	0	0
72	37.19	2,4-Di-tert-butylphenol	Phenylpropanoid/benzenoid derivative	47.4281	40.136	40.2876	53.853	62.4227	44.5924	71.7122	69.3873	55.3736	63.1279	61.7898	56.449	50.7307	58.5149	53.5112	56.871	59.8942	49.0873	60.7705	69.7251	57.6793	52.7712	66.6578	59.7145	63.179	64.8893	60.6831	106.239	131.455	119.155
73	37.64	Dihydroactinidiolide	Terpenoid	11.1804	11.4635	11.7465	11.0416	12.3277	13.6137	0	0	0	0	0	0	0	0	0	9.10275	8.78119	8.45962	8.59562	7.61345	6.63127	10.2388	9.32115	11.1564	0	0	0	0	0	0
74	37.72	(-)-Copalol	Terpenoid	0	0	0	0	0	0	4.84612	4.86922	4.52971	7.31226	8.26489	7.78858	24.1824	22.3358	20.4892	0	0	0	0	0	0	0	0	0	0	0	0	0	0	0
75	38.7	Coumaran	Phenylpropanoid/benzenoid derivative	0	0	0	0	0	0	0	0	0	0	0	0	0	0	0	21.1007	18.4423	19.7057	3.89943	5.48321	4.86582	0	0	0	0	0	0	0	0	0
76	39.4	β-1,5-Dibenzoyl-2-deoxy-ribofuranose	Phenylpropanoid/benzenoid derivative	4.56672	5.84264	5.20468	5.83448	5.82824	5.83136	3.53908	4.26826	3.90367	4.63514	5.71738	6.79962	0	0	0	0	0	0	0	0	0	5.13891	9.10455	7.12173	3.8953	4.78192	4.59085	3.68432	4.81714	4.94349
77	39.53	Indole	Terpenoid	0	0	0	0	0	0	0	0	0	4.73119	5.13202	4.33036	0	0	0	0	0	0	0	0	0	0	0	0	0	0	0	0	0	0
78	40.05	Dodecanoic acid	Fatty acid derivative	14.3276	10.8301	17.8251	12.3489	10.0059	14.6919	11.6049	10.6923	11.1486	7.9891	6.82966	9.14853	17.3255	18.136	18.9465	7.57613	8.79307	10.01	10.0252	11.7971	8.25332	10.2771	13.1463	11.7117	7.63384	9.0249	10.416	7.78975	8.9331	7.04094
79	40.91	Diisobutyl phthalate	Phenylpropanoid/benzenoid derivative	11.1934	13.8918	12.5426	11.9201	8.67536	10.2977	14.7471	13.0301	16.4641	17.372	14.721	20.0231	12.4466	15.9343	12.2127	14.451	16.0565	17.662	7.36405	9.21828	8.29117	14.4277	13.1295	13.7786	9.51333	9.36877	10.7551	12.3695	11.5756	10.7816
80	41.44	Vanillin lactoside	Phenylpropanoid/benzenoid derivative	11.4877	10.4959	8.06877	8.22728	6.71656	9.01175	6.79404	6.7028	6.88529	7.15589	4.91317	6.03453	0	0	0	20.3528	18.4095	22.2961	10.246	13.0539	11.6499	9.68795	10.4587	7.03893	3.82146	4.97049	5.03001	0	0	0
81	43.32	Butyl octyl phthalate	Phenylpropanoid/benzenoid derivative	12.4441	13.6469	14.8497	16.9985	13.383	14.8383	12.0425	10.6044	11.1669	9.94804	11.187	8.70906	13.3622	14.2183	13.7903	13.3566	15.8466	14.6016	9.77692	7.51863	12.7175	14.2656	12.4329	13.3493	10.5996	9.50787	12.787	10.1229	10.1826	12.9464
82	44.08	Imidazole, 2-amino-5-[(2-carboxy)vinyl]-	unknown	5.32702	6.23844	5.13209	6.4766	8.01733	9.67978	5.25677	5.65358	5.45517	11.2398	14.1435	12.6916	9.90872	9.7767	9.64467	5.36055	5.03626	5.68485	7.05364	5.68612	6.36988	0	0	0	6.72035	5.76373	7.67697	8.53957	7.95222	6.75706
83	46.4	n-Hexadecanoic acid	Fatty acid derivative	52.9097	48.036	63.3511	65.5223	72.8595	69.9687	50.3925	63.124	48.7674	55.4478	61.1159	45.1139	148.666	154.55	151.608	94.3062	136.215	125.488	43.2486	32.6559	37.9523	83.6709	69.6741	30.4737	42.8653	52.8241	39.7283	51.9448	38.3983	52.5823
* TS: Turpan sample; US: Urumqi sample; S: stage
