# Supplementary material for: Effect of Climate on Volatile Metabolism in ‘Red Globe’ Grapes (Vitis vinifera L.) during Fruit Development
Source: Foods. 2022 May 16;11(10):1435. doi: 10.3390/foods11101435 (PMC9140514; doi:10.3390/foods11101435)
Supplement: Supplementary file 1 [file foods-11-01435-s001.zip › Table S5.xlsx]

## Sheet: Sheet1
Table S5. Differentially expressed genes. TS: Turpan sample; US: Urumqi sample; S: stage
Gene ID	US-S1 Average FPKM	US-S2 Average FPKM	US-S3 Average FPKM	US-S4 Average FPKM	US-S5 Average FPKM	TS-S1 Average FPKM	TS-S2 Average FPKM	TS-S3 Average FPKM	TS-S4 Average FPKM	TS-S5 Average FPKM	US-S1vsTS-S1		US-S2vsTS-S2		US-S3vsTS-S3		US-S4vsTS-S4		US-S5vsTS-S5
											log2FC	Qvalue	log2FC	Qvalue	log2FC	Qvalue	log2FC	Qvalue	log2FC	Qvalue
100217471	0.31	0.333333	0.09	5.69667	0.42	0.865	0.11	1.71333	0.07	1.62667	-1.7499	0.844774	2.60045	0.522047	-4.17188	0.000269605	6.37167	0.127938	-2.34471	0.239525
100232841	33.04	3772	4069.47	1119.06	608.753	263	423.41	695.967	163.08	342.303	-2.99784	0.128273	3.63484	2.20192e-09	2.56324	1.21925e-08	2.87033	3.055e-15	0.65742	0.592608
100232846	82.915	32.27	4.98667	3.83333	9.35333	27.71	9.13333	2.27333	5.37667	5.20667	1.46224	0.000702286	2.50978	0.0579127	1.15381	0.503515	-0.393268	0.624886	0.509169	0.836666
100232853	408.655	18.0833	8.7	3.25	1.79	20.81	18.1433	8.73333	7.77	4.45333	4.10337	2.96793e-07	0.311947	0.893157	0.0122143	0.999362	-1.15507	0.21966	-1.15301	0.561271
100232854	2815.78	1944.43	1951.17	1605.81	1936.36	1548.39	1611.4	1575.51	1480.15	903.553	0.655038	0.721114	0.584534	0.601439	0.347905	0.965217	0.218743	0.672464	1.07746	0.00167841
100232856	19.885	633.273	775.143	624.687	694.317	584.695	470.88	544.553	696.49	820.7	-4.90813	6.08707e-05	0.862634	0.377117	0.540331	0.0577357	-0.0567283	0.88591	-0.504688	0.70335
100232857	1483.09	5844.52	4409.8	2676.27	2253.34	6787.33	5303.13	4843.03	2720.56	1775.03	-2.30882	8.00091e-05	0.517062	0.192193	-0.104547	0.940324	0.0784582	0.902112	0.0439669	0.983263
100232861	339.19	187.737	199.297	224.14	139.01	362.925	201.79	157.35	92.3233	139.28	-0.160315	0.949439	0.308806	0.850324	0.352398	0.647543	1.37538	1.63822e-07	-0.299374	0.874176
100232862	5.42	18.5767	28.9667	17.8	5.57	25.35	22.7067	10.6467	6.53333	16.3567	-2.40985	0.0386898	0.0577636	0.973999	1.4905	0.0143135	1.53895	9.01599e-06	-2.13745	0.298852
100232865	245.78	571.143	146.393	18.8733	8.58	305.805	135.823	43.0133	9.57333	16.3433	-0.489272	0.663132	2.59905	0.000344572	1.78046	1.44541e-05	1.0794	0.0278731	-1.34189	0.418626
100232867	96.68	44.0067	67.1433	64.0867	72.9633	78.37	74.3467	64.0467	53.65	31.5933	0.153908	0.923736	-0.52119	0.771247	0.0845097	0.915777	0.345475	0.0247436	1.24537	0.00750901
100232870	19.14	2.04667	5.74333	39.1167	30.7	15.77	31.12	45.5033	117.07	166.073	0.187761	0.980102	-3.6496	1.5944e-10	-2.97448	3.43841e-10	-1.47147	0.00288195	-2.26913	0.0239562
100232872	701.38	2222.62	3078.26	1118.59	861.753	607.435	1311.83	1364.97	2127.21	1831.75	-0.00800527	0.998188	1.06204	0.0689162	1.19422	0.00426073	-0.811653	1.42779e-08	-1.18775	0.00772888
100232879	215.06	3391.63	2119.87	1977	1494.18	874.195	1997.5	1258.56	992.28	2380.36	-2.12862	0.117588	1.11976	0.654792	0.793811	0.0384259	1.09286	0.00136577	-1.13206	0.537661
100232884	861.565	11605.8	11752.3	8321.31	6277.33	8772.84	11288	9375.49	6774.76	5325.02	-3.48309	2.1491e-08	0.39126	0.65206	0.351069	0.28001	0.40156	0.122526	0.0727486	0.93816
100232900	2.575	10.56	13.6933	6.12	10.2267	22.42	15.68	11.0233	13.6333	22.25	-3.18935	0.0084707	-0.250692	0.916069	0.332085	0.74865	-1.0572	0.00417208	-1.13541	3.6838e-05
100232905	10.2	14.4133	6.45333	2.66	0.296667	6.97	31.6667	11.9467	8.1	13.6533	0.379143	0.946345	-0.789211	0.0845816	-0.916275	0.812303	-1.50697	0.227941	-5.43829	0.000252045
100232906	2.635	11.31	10.3933	2.57667	0.643333	5.7	23.9867	12.2033	13.32	7.30667	-1.28537	0.54035	-0.851414	0.511237	-0.246192	0.970121	-2.2734	3.47392e-17	-3.75967	1.07728e-05
100232911	166.545	71.1033	28.4967	12.99	2.15	136.75	61.72	15.6233	13.6433	23.2233	0.116553	0.983594	0.724549	0.626803	0.931799	0.808889	-0.005955	0.998317	-3.95745	0.00533918
100232917	9.985	4.84	1.86333	1.41333	0.25	2.26	5.76	2.73667	1.32667	5.19667	2.04012	0.0136027	0.315516	0.960578	-0.530722	0.704648	0.156003	0.955439	-5.01632	0.00135054
100232934	433.03	98.5233	48.8	4.46333	2.14333	92.23	21.68	17.1067	5.35667	1.74	2.08167	0.0409331	2.72953	0.00247532	1.53378	0.00550813	-0.167095	0.940001	0.0578901	0.980401
100232942	61.29	21.29	5.92333	2.78333	1.14	12.535	10.24	2.38667	1.50667	13.6467	2.22714	0.149006	1.76861	0.402532	1.34946	0.00683701	0.988573	0.171963	-4.22744	0.00731276
100232943	4.835	4.64	16.32	7.07667	5.31333	14.88	6.20667	5.28333	2.7	11.6067	-1.70877	0.405129	0.155698	0.973999	1.68858	0.357325	1.4906	0.00521342	-1.52061	0.251492
100232951	6.625	14.1933	7.49333	10.0167	11.7967	15.705	9.88333	8.54	4.85	8.37	-1.42453	0.464718	0.917501	0.274438	-0.171966	0.901446	1.13438	0.00199953	0.453475	0.399645
100232957	38.01	85.1567	104.06	129.65	128.75	51.4	69.3967	63.1933	68.2	56.2567	-0.565485	0.553649	0.556165	0.698869	0.750366	0.00377	1.03077	5.35877e-07	1.12218	0.0178168
100232962	208.055	60.0467	44.5067	39.2367	43.26	70.01	58.4633	58.1733	58.0633	42.2633	1.43889	7.38751e-05	0.413857	0.577585	-0.362865	0.0883392	-0.470204	0.00521342	-0.100143	0.935836
100232966	142.54	74.08	9.52667	5.58333	4.72333	32.15	17.0633	19.1467	20.1433	8.80667	2.05735	0.00135035	2.78736	0.0228696	-0.989352	0.000327755	-1.76082	4.44837e-08	-1.1633	0.200072
100233002	656.43	2304.68	1598.93	436.297	191.447	1625.69	1310.67	742.043	170.94	261.003	-1.41435	0.0930695	1.30665	0.0592681	1.13986	8.76175e-05	1.44934	0.118239	-1.05779	0.740003
100233003	107.07	675.717	295.897	35.5	14.86	316.185	181.227	53.76	10.7667	6.64	-1.65132	0.0317245	2.16661	3.2173e-05	2.49421	7.42934e-08	1.83136	0.181674	0.8711	0.601025
100233006	415.255	89.0033	49.32	28.89	16.8567	141.615	72.71	50.49	35.1067	23.7367	1.39764	0.00516821	0.737851	0.40393	-0.0157766	0.999362	-0.183839	0.76747	-0.726142	0.480158
100233007	1.56	27.2267	69.1233	68.9933	71.5167	39.87	46.33	35.86	49.7667	37.0733	-4.82594	3.26248e-28	-0.474409	0.772403	0.965391	2.23235e-05	0.567201	0.167348	1.00235	0.100618
100233020	328.23	939.333	720.33	671.557	700.42	713.345	694.063	593.957	479.707	390.833	-1.26445	0.00338075	0.88345	0.186204	0.298694	0.483793	0.580603	0.0177602	0.663867	0.351078
100233027	1938.12	499.207	325.56	318.497	336.607	430.815	392.677	389.363	480.87	367.313	2.02122	0.000469146	0.934272	0.589179	-0.234683	0.554435	-0.491275	0.051262	-0.341046	0.789924
100233032	38.08	28.51	91.09	346.707	447.667	95.62	176.96	404.413	412.453	439.767	-1.55213	0.163201	-2.12902	0.00622002	-2.14588	6.78638e-09	-0.146105	0.711265	-0.222783	0.904476
100233045	8.015	2.16	3.21	20.8867	21.55	4.73	6.61333	8.34	4.06333	5.32	0.589148	0.772054	-1.03362	0.636255	-1.33952	0.0117737	2.45396	6.18502e-08	1.74936	0.0414834
100233048	270.415	49.7767	28.05	8.22667	4.54667	37.625	23.77	19.3567	22.73	3.89333	2.73115	6.83763e-08	1.35763	0.00203538	0.563221	0.0680275	-1.36251	4.06204e-09	0.00197136	0.998684
100233051	159.36	2.23667	0.33	5.34	0.72	2.28	0.333333	0.146667	0	0.223333	6.17729	0.475662	3.53323	0.174184	1.20627	0.88855	8.147	1.03772e-05	1.35145	0.808374
100233062	9.35	4.52333	4.36	1.45	0.613333	2.005	2.63667	2.63667	3.78667	2.39667	2.06971	5.34108e-05	1.21608	0.41311	0.742666	0.0692829	-1.28952	9.88026e-06	-2.22228	0.0226908
100233083	8.885	16.43	0.266667	0.193333	0.12	9.88	10.2833	1.92667	0.53	1.11333	-0.423523	0.946345	1.46243	0.621298	-2.82482	0.000342335	-1.38879	0.587953	-3.68628	0.0469793
100233086	105.57	55.9	12.7233	2.81667	7.05	20.655	28.6267	15.22	8.78	14.6867	2.11015	0.330239	1.54731	0.199763	-0.23054	0.970121	-1.55335	0.00707629	-1.66893	0.516526
100233091	101.03	7436.4	4099.11	1783.43	2307.9	3140.95	3270.69	2562.99	393.19	931.693	-5.23812	3.40083e-05	1.49173	0.00119472	0.729457	0.331902	2.27656	0.0085081	0.681612	0.870382
100233093	44.525	22.1967	18.19	35.9833	15.3267	14.125	15.3667	12.73	11.4867	12.6467	1.58555	0.286381	1.08585	0.554989	0.529042	0.752197	1.75138	5.06617e-05	-0.239078	0.935836
100233102	270.455	77.9933	76.3833	39.3733	43.3167	91.91	52.7267	34.2367	37.0533	23.8633	1.43897	0.00373149	0.858509	0.098706	1.19544	0.00142188	0.187302	0.752794	0.685835	0.344131
100233109	1086.33	1325.1	481.36	32.9	41.0033	644.765	312.06	57.0433	23.4467	10.7367	0.723902	0.847006	2.26276	0.0774369	3.1103	3.93953e-15	0.591416	0.384431	1.59277	0.169322
100233112	89.18	18.9067	11.97	4.24333	1.99333	6.985	6.36	4.43667	4.16333	8.38667	3.45045	0.00562033	2.23648	0.132556	1.44519	0.00197653	0.128052	0.940001	-2.21721	0.000761542
100233114	181.685	7.1	4.06667	0.83	0.54	16.845	31.88	0.59	0.196667	37.9433	3.32567	0.0392	-1.51214	0.872751	2.78619	3.41542e-05	2.17385	0.272196	-6.81775	0.168542
100233116	15.85	8.55667	8.71	21.93	11.56	18.14	13.47	12.65	5.03333	9.37	-0.332953	0.897279	-0.349294	0.846987	-0.502391	0.605293	2.19983	0.0076272	-0.0561477	0.983263
100233119	32.325	22010.3	18703.4	18449.7	17707	7531.01	15759.6	19847.7	16317.3	27626.2	-7.95104	5.40693e-07	1.12325	0.54767	-0.0534044	0.976302	0.270732	0.144593	-1.10748	0.544237
100233126	27.86	16.71	11.36	10.0733	6.43333	28.71	13.83	6.69667	5.31667	7.5	-0.172654	0.923736	0.768912	0.741502	0.770074	0.133713	1.01494	1.5433e-05	-0.635832	0.769641
100233129	35.875	55.7533	49.04	24.73	31.0967	31.625	31.0633	22.42	40.9267	40.8033	0.0605393	0.973305	1.19205	0.0022819	1.15715	0.00122201	-0.62236	0.0734138	-0.576407	0.566071
100233133	104.805	55.3133	81.99	39.27	43.3267	74.765	50.1	61.48	39.4167	18.99	0.356948	0.807736	0.485559	0.654242	0.441692	0.299651	0.0943647	0.880413	1.21118	0.00299092
100240763	47.19	3.02333	0.943333	2.14667	1.90333	11.14	3.82667	1.27	0.456667	2.88667	1.91223	0.00640641	-0.0364117	0.982568	-0.428667	0.933908	2.30406	0.0303852	-1.26504	0.739593
100240792	23.115	83.8067	126.58	68.3133	37.7133	72.345	101.343	60.1733	23.84	15.5567	-1.78201	0.031379	-0.0625103	0.973999	1.10264	9.09487e-05	1.61411	4.06986e-06	0.978454	0.408722
100240803	36.53	24.62	7.07333	0.68	2.16	2.125	9.36	6.79	12.68	1.19	3.8006	0.103528	1.68988	0.13551	0.0990335	0.986961	-4.11891	4.31213e-10	0.853699	0.622495
100240811	30.09	10.7767	14.9233	23.7167	9.65333	30.34	19.1667	18.9433	8.22333	8.91667	-0.129996	0.946345	-0.511938	0.572091	-0.317487	0.643164	1.61703	0.00236693	-0.091514	0.941643
100240827	3.205	14.0967	14.3167	3.88333	1.61	27.335	16.04	6.00667	1.72	2.27	-3.25723	3.96648e-06	0.0886758	0.97446	1.30499	0.128516	1.27606	0.00852395	-0.630393	0.628259
100240833	10.47	5.77667	6.02667	11.8167	15.36	7.515	9.52333	13.1867	10.74	9.14667	0.346001	0.863166	-0.358154	0.711748	-1.10787	0.00346797	0.236846	0.573316	0.866704	0.480497
100240836	9.5	13.8333	5.37	1.82	0.613333	5.38	4.32333	3.65	4.85333	6.63333	0.67137	0.539007	2.31369	0.0403826	0.570572	0.217833	-1.31536	0.0049883	-3.93029	0.00227365
100240860	0	2.61	0	0	0	0	0	0	0	0.436667			22.361	6.73273e-06					-5.58195	0.0295989
100240862	0.605	0.103333	0.553333	8.10333	0.793333	1.305	0.75	1.86667	0.146667	1.32333	-1.24162	0.810528	-2.63419	0.102825	-1.76709	0.022645	6.01696	0.00507236	-1.10366	0.646758
100240864	18.025	0.08	0	0.07	0	0	0	0	0	0.0333333	22.6117	0.000200122	2.54454	0.905322			2.00011	0.880413	-1.02622	0.935836
100240884	1.9	1.17	2.08667	4.22333	7.66667	1.71	1.53	1.8	1.93667	3.22667	0.0534946	0.990674	0.169625	0.973999	0.226525	0.905764	1.2206	0.000214757	1.15886	0.00221916
100240897	12.415	2.49	16.7667	7.06333	14.7167	1.38	1.07333	1.58333	24.24	11.6033	3.04366	1.54855e-05	1.48567	0.370188	3.44899	0.100983	-1.6724	1.03527e-05	0.487651	0.854174
100240909	91.315	99.7767	72.6433	34.5333	90.2533	94.02	167.457	30.9467	9.76	48.9167	-0.173283	0.955254	-0.4343	0.943906	1.28085	0.0514194	1.93788	0.00150184	0.26955	0.936704
100240984	7.3	11.5133	2.16667	3.28667	1.4	5.85	5.04	2.19	2.49667	8.31667	0.188575	0.961964	1.66588	0.13203	-0.0104806	0.999362	0.489337	0.483059	-2.59271	6.12462e-05
100240994	5.54	13.0733	1.70667	1.71667	0.983333	3.975	7.53333	9.43667	5.63	2.18	0.350539	0.855698	1.2072	0.185429	-2.47092	0.157869	-1.62757	0.00945756	-1.13942	0.0637797
100241000	2.235	1.13	2.22667	2.17667	1.08667	0.805	1.5	1.52667	5.57333	12.13	1.30095	0.544949	0.0522617	0.977027	0.550382	0.701281	-1.25943	0.000214286	-3.32484	0.0105929
100241013	26.97	35.5067	25.7433	11.22	14.4	24.62	31.54	30.4567	29.82	13.6967	-0.0523995	0.987954	0.542024	0.569528	-0.221669	0.856779	-1.31175	3.45475e-08	-0.0248945	0.97964
100241028	77.66	10.4933	12.43	2.43667	1.02333	16.17	11.5867	3.5	3.41333	1.68667	2.20212	0.418659	0.166577	0.952826	1.8413	1.85926e-05	-0.397818	0.749318	-0.720782	0.778205
100241056	92.25	32.65	14.7467	6.19	1.09	2.65	41.4467	6.04	61.4533	52.8867	5.09197	0.000859159	0.130777	0.973999	1.27943	0.608591	-3.23802	0.0162624	-6.07357	1.99738e-06
100241065	61.465	26.2967	2.97333	0.16	0.04	23.97	9.03667	1.65	0.416667	0.403333	1.10951	0.705534	2.07843	0.00857158	0.872389	0.289631	-1.25846	0.505063	-3.92397	0.263375
100241082	3.725	6.57	7.31667	2.73	1.61	2.565	5.40667	4.50333	7.59333	3.63333	0.361406	0.856881	0.489098	0.792147	0.718838	0.40099	-1.396	0.0065272	-1.13178	0.144415
100241085	108.17	42.0767	17.6033	8.61333	3.56	18.43	52.76	15.85	34.5933	20.62	2.46033	0.204265	-0.00358358	0.997119	0.150061	0.970121	-1.93421	0.241846	-2.63457	1.25243e-05
100241120	14.625	6.66	5.97333	5.86	4.45667	6.97	7.01667	4.77667	5.83	9.52333	1.00541	0.675066	0.285081	0.820133	0.333705	0.497656	0.0968357	0.940001	-1.14587	9.7164e-05
100241136	56.99	225.477	38.8933	4.77667	8.51667	23.1	25.1967	19.88	28.0933	8.13	1.07222	0.570277	3.73277	2.86459e-05	1.00652	0.620588	-2.46616	2.3019e-43	-0.333308	0.904476
100241138	3.185	1.43	1.29	0.703333	0.213333	1.51	1.37333	1.30667	2.47333	1.58	0.905959	0.70115	0.443636	0.837993	-0.00110276	0.999668	-1.71226	0.0143251	-3.01693	0.00062978
100241185	20.535	7.85333	3.68667	2.22	1.48	6.215	2.8	3.81667	5.00667	4.03667	1.6985	0.321878	1.9368	0.00111355	-0.030281	0.989394	-1.07624	9.3632e-05	-1.47494	0.00154724
100241199	5.275	0	0.163333	0.503333	0.1	0	0.0333333	0.16	0.16	0.133333	8.00118	0.00213931	-0.442872	0.973999	0.00109743	0.999916	1.73753	0.51536	-0.281855	0.972828
100241219	30.765	30.9867	7.58333	3.09667	1.70667	8.11	7.25333	5.65333	3.43667	5.94	1.78138	0.000599344	2.772	0.0140533	0.436987	0.549863	-0.0557148	0.940001	-2.34673	0.157194
100241253	1.805	9.77	1.28333	1.01333	0.926667	0.35	1.07667	1.57	3.91333	1.29	2.34786	0.635577	3.76204	0.000700201	-0.311356	0.970121	-1.88047	0.00629001	-0.582565	0.730229
100241281	0	1.83	0	0	0	0	0	0	0	0.333333			22.2739	7.24209e-06					-5.51441	0.0888644
100241301	16.425	33.61	114.76	56.9767	62.09	21.83	51.6367	85.0267	126.597	60.2033	-0.517773	0.846815	-0.364929	0.872751	0.455009	0.559197	-1.05057	3.156e-06	0.126288	0.935836
100241372	12.645	35.5033	27.8267	37.9467	100.047	160.925	110.277	97.45	36.8033	34.4033	-3.74948	1.36646e-07	-1.22766	0.103484	-1.79812	0.072322	0.131911	0.918848	1.16844	0.483509
100241377	12.25	2.28667	0.406667	5.57	0.823333	5	1.74	1.8	0.23	5.14667	1.04903	0.746606	1.14291	0.733735	-2.12745	0.000187989	4.67979	0.0397884	-3.00787	0.0750607
100241426	62.575	43.2167	28.7867	21.97	28.1933	23.255	36.9767	38.7967	47.2533	46.0667	1.32053	0.267767	0.654194	0.379045	-0.390779	0.187677	-1.0371	0.00071927	-0.85336	0.0500222
100241428	3.315	3.16	2.49333	5.25333	4.14	5.89	4.41667	5.85	5.39	6.07	-1.02206	0.52601	-0.074159	0.973999	-1.21146	0.000360562	0.0624405	0.940001	-0.679619	0.296734
100241452	24.97	146.527	131.797	71.9167	37.3767	174.485	132.937	87.61	66.8367	33.4467	-2.94335	5.93089e-12	0.450971	0.572521	0.612413	0.24138	0.20413	0.758712	-0.0470179	0.978007
100241458	343.855	196.39	98.0733	33.1567	5.00667	137.255	232.597	77.9933	69.4267	95.66	1.1031	0.7453	0.16555	0.93	0.380849	0.970121	-0.992647	0.72354	-4.4971	3.84808e-08
100241461	107.825	36.65	86.6667	62.52	45.74	53.915	36.2267	35.4167	47.0933	28.1967	0.883047	0.408865	0.340639	0.826088	1.30877	7.26558e-05	0.505882	0.350116	0.625531	0.397451
100241465	15.465	0.666667	0	0	0	23.51	6.33667	1.27333	0.103333	0.196667	-0.905749	0.946345	-2.62165	0.336248	-7.2353	0.00036485	-3.52733	0.437011	-4.99873	0.336197
100241481	19.135	43.8567	39.9567	58.1667	65.7267	73.49	77.5933	78.0267	44.0833	55.58	-2.08615	7.08114e-07	-0.453492	0.436414	-0.9422	0.00529724	0.492589	0.0761964	0.20327	0.58865
100241491	44.195	11.15	10.45	1.4	0.72	13.065	5.06667	4.52	2.46	0.65	1.65034	0.0443192	1.49137	0.0571402	1.22484	0.00200589	-0.715515	0.500619	-0.0575697	0.98033
100241530	3.92	3.16333	7.68	17.12	14.2267	11.575	13.3967	11.6133	8.97333	13.5267	-1.72469	0.0193581	-1.74355	2.20192e-09	-0.56336	0.298539	1.02598	3.49779e-05	0.0401329	0.9529
100241544	50.47	0.936667	1.81667	1.17667	0.44	5.94	1.77	0.86	1.51	1.97	3.01868	0.00772513	-0.658054	0.842454	1.10715	0.377824	-0.229441	0.862268	-2.09962	0.0908863
100241554	8.17	27.96	46.8867	60.1133	61.7167	32.93	58.79	67.04	74.08	41.45	-2.19513	0.00899792	-0.770724	0.291187	-0.491769	0.00801388	-0.200391	0.278621	0.630527	0.368752
100241571	21.17	11.9767	8.96333	14.5	6.95333	10.785	9.76667	3.37	4.43667	12.0567	0.718248	0.920736	0.62723	0.740443	1.39867	0.661695	1.81943	0.00912646	-0.698561	0.697377
100241572	0.735	0.113333	0.513333	0.31	0.13	1.055	0.883333	0.856667	1.47333	0.97	-0.535656	0.946345	-2.61609	0.098706	-0.728683	0.790245	-2.15697	0.00954744	-2.91378	0.0182192
100241575	0.17	10.71	31.0433	16.2433	23.44	0.35	3.42333	8.55	2.49667	17.33	-1.19483	0.731508	2.09274	0.187134	1.87276	0.399122	2.81163	0.00477305	0.614493	0.859397
100241577	13.68	1.97333	3.60667	4.25	1.63667	6.47	6.88333	4.39667	5.83667	3.82	0.962662	0.471315	-1.39907	0.255457	-0.271164	0.843351	-0.360192	0.382214	-1.28731	0.00248314
100241597	27.575	2.76	3.15667	2.38333	1.80667	2.235	1.56333	0.903333	1.18	0.62	3.54506	0.00109816	1.24092	0.396562	1.81644	0.016541	1.10241	0.302882	1.43811	0.177831
100241606	29.41	60.55	54.47	18.2133	13.27	18.24	38.7933	12.0633	39.6567	36.3167	0.627569	0.836894	0.950624	0.305814	2.17972	8.3379e-07	-1.02928	0.00232075	-1.6258	0.0976002
100241610	1.665	0.133333	0.233333	7.96333	12.0333	4.43	1.87667	7.44	31.68	43.0233	-1.50192	0.935455	-3.55245	0.000503529	-4.96637	5.80285e-17	-1.90714	0.0479154	-1.99308	0.00154831
100241637	4.675	684.083	1258.11	656.527	385.94	684.54	910.967	970.603	399.17	176.64	-7.26874	2.91923e-10	-0.136978	0.972605	0.402308	0.05081	0.818523	1.69901e-06	1.13004	0.00268673
100241639	0.04	0	0.136667	1.22	0.99	0.015	0.02	0.0533333	0.28	1.30667	1.49433	0.946345	-1.36873	0.960578	1.29964	0.834135	2.20386	0.00230278	-0.282575	0.915719
100241641	5.32	8.41667	8.60333	12.5067	2.92333	14.84	11.3967	4.67667	5.89	6.48	-1.66947	0.117031	-0.109863	0.973999	0.886796	0.215976	1.18486	0.000456973	-1.28195	0.121388
100241651	0.225	1.22	9.61667	20.0667	19.3133	2.125	3.09667	5.28333	4.07667	6.93333	-3.36131	0.0233621	-0.965474	0.510539	0.898011	0.514652	2.40674	2.47161e-06	1.53676	0.0711873
100241685	34.035	74.3367	140.93	143.597	128.733	135.405	118.277	121.54	109.813	110.41	-2.12263	0.00234729	-0.297062	0.67769	0.247794	0.78598	0.493833	0.000403195	-0.03653	0.984871
100241686	3.74	8.69333	10.8633	7.95667	8.90667	10.53	8.65667	7.60333	9.64333	9.77	-1.60206	0.00413913	0.389487	0.753143	0.535943	0.0224157	-0.18192	0.692854	-0.188333	0.693855
100241707	10.11	2.00667	8.55333	4.74	2.53667	3.26	5.82	1.46667	1.65	4.25	1.59102	0.556929	-1.1743	0.347893	2.54129	5.01248e-12	1.61573	0.0429162	-0.949337	0.625339
100241723	12.24	38.7367	47.21	29.34	33.9567	30.685	31.8033	39.7533	39.2967	41.9933	-1.45565	0.00678998	0.783635	0.481757	0.263987	0.542638	-0.324716	0.158887	-0.445902	0.539621
100241745	281.51	21.8567	8.56667	0.4	0.303333	12.455	3.35	1.18333	0.213333	0.29	4.33717	1.4765e-06	3.28439	0.00168851	2.90947	0.00141173	1.06289	0.706474	-0.516781	0.935836
100241753	98.45	134.84	429.57	85.2133	153.75	120.63	112.06	138.457	124.217	114.63	-0.34051	0.946345	0.649042	0.328898	1.66264	7.79332e-19	-0.445611	0.066427	0.395086	0.417723
100241765	0.355	0.466667	1.70333	0.433333	0.51	0.495	0.203333	0.4	1.21	0.883333	-0.516288	0.946345	1.65756	0.25198	2.10244	0.0001781	-1.36703	0.0293191	-0.810703	0.461311
100241784	30.795	2.91667	4.35333	1.95333	4.88	2.83	3.29	2.72333	2.12333	3.08667	3.38522	0.00475607	0.123727	0.973999	0.691603	0.488459	-0.0237192	0.986771	0.52215	0.709056
100241814	2912.18	130.66	40.0933	14.4833	1.58	181.61	45.7033	10.9833	11.38	7.53333	3.84742	0.000529541	1.77236	0.0223653	1.87846	0.0016382	0.429078	0.898651	-2.26683	0.00176063
100241839	10.325	1.91667	3.66667	1.00667	0.463333	1.215	3.84	1.35667	2.69	1.31667	2.9649	2.40255e-05	-0.73555	0.754529	1.4394	0.0081159	-1.33221	0.312095	-1.45878	0.482686
100241856	5.895	1.93667	1.62333	1.05333	0.486667	2.445	2.10333	1.95	1.69	1.5	1.1397	0.292565	0.374665	0.896572	-0.245114	0.906441	-0.584491	0.440281	-1.65859	0.00359073
100241862	25.05	313.943	335.39	175.293	178.83	380.155	328.37	314.703	284.933	101.867	-4.03775	3.55921e-19	0.173629	0.960578	0.122548	0.943328	-0.605613	0.0185218	0.751104	0.000292216
100241887	137.695	11.56	15.3233	6.14	3.82333	16.675	6.29667	6.37	6.43667	2.26667	2.93866	0.0069496	1.38968	0.334926	1.2875	0.0192449	0.0331442	0.986771	0.543669	0.70481
100241895	1.835	2.28333	5.60333	0.583333	0.136667	2.585	2.33667	0.696667	1.19333	0.33	-0.573259	0.931035	0.334347	0.960578	3.04644	0.0012862	-0.943459	0.646202	-1.82822	0.754125
100241912	12.765	4.10333	4.38	1.59	1.47	5.39	2.85667	3.88	6.25667	1.31	1.09169	0.614629	1.11656	0.596211	0.185243	0.970121	-1.87928	6.84562e-08	-0.212849	0.935836
100241934	6.755	24.8533	32.1733	15.0167	14.96	18.23	24.8067	29.7567	19.6067	6.17667	-1.56664	0.0110587	0.425723	0.698853	0.128424	0.970121	-0.280329	0.706422	1.20272	0.000957886
100241935	5.895	7.24333	1.15333	0.28	0.223333	1.85	1.40333	0.843333	0.5	0.43	1.56586	0.0494899	2.95712	0.001512	0.475165	0.730403	-0.748202	0.544684	-1.43806	0.580959
100241958	11.425	7.60667	8.33667	5.28333	10.7	4.36	5.97	5.37333	7.79333	11.1667	1.25587	0.0048065	0.84433	0.442409	0.643449	0.0433953	-0.468283	0.1074	-0.182056	0.873012
100241983	6.325	15.8667	11.4333	1.78	1.03	5.085	6.17	5.30333	3.82667	2.08667	0.162687	0.946345	1.59497	0.0523977	1.13178	1.24826e-06	-1.01277	0.00430495	-1.00983	0.0841328
100242017	17.36	1.15333	2.70333	2.43333	0.43	2.795	7.49	3.89333	1.87667	2.16	2.5076	0.0321683	-2.45745	0.0130729	-0.539787	0.892258	0.454175	0.82591	-2.41585	0.00421134
100242028	1.61	0	0.123333	0.176667	0.53	0.695	2.23	0.0166667	0.17	0.463333	1.24196	0.91307	-21.6614	1.53732e-05	2.96034	0.592075	0.148631	0.971497	-0.425313	0.935836
100242036	1.215	2.43333	3.39667	1.44	0.603333	1.935	4.72	4.06333	4.42667	4.93333	-0.821578	0.610086	-0.553418	0.599486	-0.248404	0.886753	-1.52847	0.000639183	-2.97206	9.40305e-06
100242048	1.265	74.8433	55.73	20.82	8.81333	28.365	69.7067	38.9333	12.3767	9.34	-4.62995	5.09795e-11	0.537239	0.593938	0.537096	0.14925	0.849017	0.0485059	-0.154693	0.935836
100242055	56.11	75.75	47.63	27.28	35.1	24.05	60.4433	28.32	66.0367	79.3767	1.13707	0.403198	0.734573	0.500146	0.747695	0.330129	-1.18299	0.00345597	-1.41355	0.140123
100242080	2.29	3.73	3.54	2.61	1.51333	2.055	3.44667	4.05667	2.38	3.84667	-0.0960214	0.980689	0.499473	0.600716	-0.171664	0.900344	0.226443	0.784954	-1.45321	3.34304e-05
100242085	62.925	43.2567	48.6467	92.8633	104.763	63.68	48.01	50.57	48.94	49.25	-0.154936	0.931035	0.124684	0.960578	-0.0314702	0.984847	1.01977	6.57067e-11	0.990888	0.000265824
100242118	6.565	5.06667	2.71333	0.816667	0.68	3.675	2.06	1.36333	1.38	1.12667	0.630113	0.798691	1.78212	0.00999199	1.00032	0.0756422	-0.659938	0.265767	-0.83571	0.359126
100242128	0.18	6.74667	6.64333	5.3	2.17667	3.21	10.0733	6.86667	9.62333	8.32333	-4.40136	0.00460813	-0.23503	0.949727	-0.0508971	0.98755	-0.754867	0.375005	-1.78829	0.352559
100242133	0.21	0.246667	0.0866667	0.553333	0.556667	0.205	1.10667	0.91	1.00667	1.02333	-0.16036	0.981565	-1.86776	0.145582	-3.46031	0.000967286	-0.768419	0.473142	-0.837515	0.589044
100242154	56.79	5.19333	1.21333	2.36667	0.216667	6.67	10.3767	1.31667	1.38667	3.85333	3.01101	0.260822	-0.57347	0.849496	-0.0666669	0.98755	0.833208	0.733288	-4.64689	0.00743792
100242158	40.04	71.2633	180.62	105.497	102.627	119.915	117.873	122.627	91.9433	53.4267	-1.729	1.51275e-05	-0.475657	0.718094	0.587316	0.0412306	0.294262	0.0568172	0.939788	0.0172085
100242167	0.905	0.513333	1.04	0.54	0.69	0.405	0.213333	0.243333	0.28	0.356667	1.00975	0.642882	1.64937	0.272265	2.17609	0.00670311	1.00266	0.223346	0.925122	0.466579
100242170	21.525	26.5467	17.7667	6.49	5.55667	12.31	9.14667	15.2233	19.2333	6.14667	0.707995	0.659284	1.97989	0.0557205	0.26839	0.964317	-1.46717	6.66483e-09	-0.264518	0.884164
100242175	0.56	1.30667	0.433333	0.453333	0.43	0.645	0.29	0.383333	0.48	0.78	-0.353604	0.946345	2.51845	0.00108737	0.168263	0.970121	0.0122351	0.991778	-0.74082	0.752565
100242179	81.135	11.2033	2.77	0.613333	0.0533333	21.475	3.61	0.36	0.0533333	0	1.80207	0.00166028	1.96211	0.00991367	2.95467	0.00442306	3.67449	0.231145	1.80606	0.904476
100242244	12.915	35.7267	43.0233	13.86	18.9	15.525	53.0733	37.42	49.9567	27.6967	-0.387712	0.915013	-0.283002	0.893157	0.222045	0.792667	-1.73778	4.5976e-08	-0.559285	0.247974
100242257	8.295	3.31333	2.83	1.16333	0.36	1.62	1.42667	1.84333	1.59	0.586667	2.21862	0.0858277	1.62357	0.0072587	0.630085	0.361097	-0.35969	0.747943	-0.904311	0.5546
100242272	0.845	0.463333	0.48	0.14	0.0933333	0.38	0.58	0.236667	0.546667	0.693333	0.930587	0.882142	-0.0158882	0.993351	1.04416	0.349	-1.8537	0.00441302	-3.31976	0.0187224
100242278	0.46	0.833333	1.96	4.93333	6.22	1.785	2.61667	2.59	4.00667	10.6433	-2.10157	0.0576968	-1.28495	0.00845009	-0.391372	0.592011	0.392653	0.551408	-0.666591	0.605251
100242290	33.67	8.30333	8.21667	3.51	2.02	5.885	9.30667	7.02667	6.78333	4.16	2.39582	7.60248e-08	0.0785399	0.973999	0.226573	0.849188	-0.823281	0.218634	-0.991303	0.235304
100242306	3.355	3.88333	4.33	2.52333	2.99667	2.095	3.09667	4.07	5.94667	3.2	0.568165	0.817898	0.664665	0.344625	0.107715	0.970121	-1.14561	0.000165335	-0.0566503	0.957101
100242322	0.725	0.176667	0.9	0.66	0.383333	0.525	0.353333	0.236667	0.286667	0.146667	0.350224	0.931035	-0.748224	0.838328	1.98406	0.00344737	1.32707	0.279815	1.55011	0.385967
100242323	2.155	0.896667	0.9	0.536667	0.15	1.735	1.12	0.226667	0.303333	0.446667	0.267644	0.946345	-0.0176324	0.99108	2.02178	0.00154072	0.963043	0.284619	-1.92958	0.235542
100242338	19.91	11.96	10.3667	9.33	8.25667	15.645	6.18667	7.55333	29.3333	31.0833	0.326983	0.946345	1.43313	0.379045	0.471254	0.429363	-1.56363	0.000421316	-1.90891	2.44632e-09
100242339	3.47	1.08333	1.97	3.37	2.93333	2.495	2.36333	1.86667	1.69	2.16333	0.345304	0.846815	-0.801555	0.464244	0.10852	0.970121	1.0798	0.00709433	0.431729	0.517057
100242353	35.675	132.967	96.8367	132.943	132.73	190.775	87.57	83.79	58.88	50.7467	-2.50805	0.0747004	0.88779	0.225546	0.241947	0.847993	1.27455	0.00219137	1.31314	6.96562e-05
100242384	27.83	0.35	0.0733333	0.0133333	0.193333	0.82	0.206667	0.0833333	0.0333333	0	5.1166	1.54855e-05	1.39192	0.803607	-0.160606	0.99421	-1.34691	0.900587	4.70025	0.103197
100242414	24.795	3.15	5.06	1.71	2.12	3.78	3.44667	2.78333	9.07667	3.05667	2.69435	0.132043	0.201478	0.959565	0.87616	0.650574	-2.3176	3.2845e-08	-0.751165	0.68113
100242429	7.44	3.44667	6.11	1.3	0.28	5.625	5.76333	1.96667	0.726667	0.92	0.339683	0.946345	-0.468703	0.919703	1.65633	0.00498765	0.928906	0.699187	-1.76707	0.468615
100242449	1.06	11.97	6.75333	2.57667	0.926667	3.865	8.17	4.83667	0.413333	2.51667	-2.05541	0.129711	1.02425	0.429636	0.490391	0.883756	2.72783	0.000104651	-2.0531	0.41416
100242453	31.605	33.8533	110.453	106.123	144.6	89.62	73.6533	105.13	90.79	115.273	-1.64498	5.30575e-06	-0.832241	0.132556	0.0948596	0.970121	0.322199	0.0962691	0.353028	0.632371
100242465	2.305	14.03	4.46667	3.94667	5.05	6.895	8.12	9.47333	9.16	5.90333	-1.80594	0.226856	1.41132	0.466072	-1.05888	0.0338356	-1.12173	6.76111e-06	-0.401502	0.759321
100242476	4.9	0.996667	0.71	0.38	0.17	0.975	1.12333	0.483333	0.84	1.67333	2.25528	0.417914	0.394322	0.920653	0.562876	0.774657	-1.07613	0.513106	-3.63265	0.000117648
100242506	55.26	4.95333	1.58	0.233333	0.283333	4.695	0.803333	0.09	0.0466667	0.136667	3.47755	0.00394661	2.86997	0.0393228	4.1555	0.0205391	2.48141	0.456337	0.828846	0.844451
100242533	24.02	47.8433	51.4133	92.2633	67.5233	62.155	64.4967	67.7567	84.07	99.53	-1.50072	3.25116e-05	0.00220523	0.998109	-0.383536	0.0481509	0.225384	0.339752	-0.791637	0.336185
100242538	29.64	64.6233	42.6133	4.73	15.4267	8.065	11.28	18.75	33.3633	4.08	1.64811	0.341259	2.79866	0.000349371	1.21597	0.0525901	-2.7305	4.37054e-11	2.03988	0.0378669
100242564	68.565	28.0333	28.25	15.3167	19.45	16.87	12.0733	23.52	11.1267	11.6567	1.88294	6.92593e-08	1.59319	0.127707	0.294686	0.629211	0.551307	0.162079	0.374269	0.892594
100242603	1326.56	8895.56	10541.5	8099.86	7543.55	8436.92	10366.6	10249.3	10097.7	5884.51	-2.8234	9.50348e-06	0.100589	0.960578	0.0733769	0.970121	-0.215039	0.0513687	0.253616	0.688882
100242631	4.82	5.28667	1.22	0.786667	0.47	3.145	2.25333	2.6	2.05	2.60333	0.368167	0.946345	1.76722	0.112479	-1.09202	0.231609	-1.28768	0.0526121	-2.6027	0.00860212
100242646	3.365	36.8167	35.7467	17.7167	27.2933	34.03	34.0367	11.0567	5.03	7.37	-3.51133	0.0076565	0.611762	0.852913	1.74219	0.000716799	1.93003	0.000829589	1.3845	0.549497
100242737	117.83	1965.39	1310.19	1191.76	953.66	522.13	1274.72	727.253	600.627	1579.05	-2.21915	0.311626	0.964402	0.744268	0.892689	0.0520012	1.08371	0.000739812	-1.20636	0.517121
100242761	7.195	6.63667	6.73333	7.73667	6.24333	8.035	9.13667	10.9033	7.96	1.37333	-0.317296	0.946345	-0.0999413	0.973999	-0.647494	0.701281	0.0605245	0.966616	2.11545	0.000600492
100242786	5.18	0.413333	0.556667	0.173333	0.14	0.53	0.16	0.126667	0.263333	0.293333	3.16625	0.00100652	1.65791	0.137916	2.13515	0.00601756	-0.502656	0.746386	-1.21812	0.305254
100242821	162.11	201.21	8.81667	2.46	0.463333	49	23.9067	19.4933	10.33	8.29333	1.66544	0.391641	3.73553	0.00845009	-1.12991	0.00232042	-2.01575	0.015253	-4.22457	0.0117751
100242832	250.9	223.027	120.527	30.1267	28.2167	61.085	123.267	58.0933	113.503	81.3967	1.95233	0.130255	1.37811	0.108096	1.05987	0.0152572	-1.82225	2.18117e-08	-1.77857	0.0764314
100242853	1.765	0.906667	0.936667	1.27667	1.08667	1.33	1.01	0.746667	0.626667	0.763333	0.253898	0.923736	0.112289	0.964549	0.325409	0.743583	1.11748	0.00651126	0.474947	0.463287
100242940	1.565	34.1067	25.6267	2.38	0.223333	8.91	16.4133	6.99333	6.18333	1.67	-2.60018	0.100042	1.24774	0.422592	1.8981	0.000686558	-1.27617	0.250957	-3.12235	0.0463145
100242977	23.035	0.533333	2.22	2.13667	1.17333	0.765	0.286667	0.146667	0.426667	0.623333	4.9347	0.0142124	1.13438	0.679449	4.18748	0.00888429	2.40735	0.0077711	0.966176	0.664217
100242982	91.875	5.21	4.82667	11.49	4.57	4.365	3.15	4.34667	1.57	4.21667	4.33073	0.0326369	1.39925	0.485195	0.178916	0.970121	2.94278	0.000170597	-0.198926	0.935836
100242994	1.815	0.423333	0.57	22.19	2.45667	2.335	0.506667	6.17333	0.183333	4.99	-0.687844	0.946345	0.572078	0.961293	-3.39593	6.70211e-05	6.98933	0.044752	-1.46527	0.619366
100242996	4.545	10.6933	15.8933	15.4967	22.5067	20.415	15.7933	15.4833	16.2167	22.3033	-2.27274	8.72849e-06	-0.317895	0.915753	0.0619532	0.970121	0.0283687	0.969114	-0.140453	0.913856
100243007	13.83	15.79	35.5767	46.81	103.957	39.85	35.5167	45.44	30.51	44.4667	-1.70089	0.00509557	-0.960036	0.472453	-0.327293	0.424678	0.712572	0.00138282	1.2568	0.0083295
100243039	6.385	5.98333	9.72333	8.13	3.76333	5.695	5.56667	4.35333	5.93333	3.68	-0.0249161	0.993854	0.352916	0.895596	1.18224	5.39312e-05	0.555771	0.286497	0.124803	0.935836
100243049	47.415	15.0367	15.76	9.98	7.91333	20.195	16.8467	14.23	28.44	10.4367	1.03143	0.415663	0.241386	0.91758	0.164437	0.907325	-1.41295	1.96948e-11	-0.257957	0.923436
100243072	1.175	3.58667	6.36667	11.3167	4.24	2.24	4.12667	6.42	4.74333	3.90333	-0.993307	0.701384	0.281286	0.927606	-0.00519364	0.999362	1.35722	0.00770853	-0.0466865	0.971731
100243084	37.775	22.9133	12.53	26.98	39.89	78.17	64.6233	28.68	10.8433	17.6033	-1.27043	0.501022	-1.07556	0.170718	-1.17404	0.0565979	1.40956	6.26471e-06	0.764084	0.685436
100243093	12.805	33.95	13.4367	6.25	4.28333	3.07	8.69667	14.7833	11.18	14.7467	1.84438	0.361356	2.69216	0.0798575	-0.145042	0.970121	-0.73243	0.271915	-2.03719	0.00413314
100243127	44.94	138.29	135.87	119.427	99.47	167.4	153.99	161.38	141.587	158.757	-2.03657	1.86933e-10	0.374635	0.878722	-0.217772	0.814124	-0.147396	0.705444	-0.936309	0.330288
100243137	10.465	7.34	15.1667	39.1133	27.1967	51.78	25.6867	35.67	14.2333	12.17	-2.43103	2.34028e-12	-1.33349	0.0691756	-1.18774	0.0221157	1.54741	0.000152463	0.768479	0.674694
100243163	10.99	20.21	27.98	6.34333	9.53333	25.82	10.0767	5.89667	9.45333	7.52333	-1.30611	0.330032	1.35622	0.00963893	2.27639	6.40716e-19	-0.471683	0.491098	0.346156	0.693152
100243201	418.485	187.12	57.22	7.66333	2.33667	230.51	39.37	19.8333	5.38	2.53333	0.703285	0.623722	2.62223	1.5944e-10	1.55909	0.348273	0.617517	0.706163	-0.395085	0.867755
100243222	16.255	28.89	8.91333	34.9133	46.8167	27.82	29.5133	18.5733	23.12	107.223	-0.870967	0.425997	0.594059	0.842454	-1.04783	9.1648e-05	0.690747	0.0761964	-1.69828	0.306286
100243248	3.97	8.79	7.06	2.25667	1.75333	6.865	7.28667	6.66	5.56333	2.15	-0.926061	0.344453	0.612908	0.40524	0.101151	0.970121	-1.20905	0.00450148	-0.442243	0.688882
100243265	7.325	36.15	230.037	59.36	34.1333	201.8	76.0767	119.63	91.5133	23.0467	-4.84768	1.54165e-10	-0.884883	0.648235	0.990862	0.116231	-0.528785	0.781348	0.436834	0.691725
100243307	1.39	1.44333	0.75	0.283333	0.02	1.23	0.536667	0.45	0.366667	0.19	0.0814396	0.988265	1.78765	0.00695912	0.758333	0.673524	-0.296949	0.927224	-3.41381	0.173114
100243329	9.255	0.673333	2.49667	3.01	5.58	1.43	0.5	0.21	1.53333	3.36	2.58671	0.200798	1.01045	0.820693	3.5786	4.78634e-07	1.06842	0.0197515	0.729613	0.408326
100243498	39.48	19.13	27.6033	47.1933	65.24	44.795	34.4067	31.6233	36.4733	25.7433	-0.320141	0.880778	-0.552173	0.612266	-0.171644	0.767517	0.466092	0.0851756	1.328	7.428e-07
100243519	3043.41	352.027	300.927	105.227	70.3833	309.34	251.527	143.663	214.4	121.08	3.22353	0.000208663	0.693906	0.724233	1.07661	0.0204618	-0.922361	0.000470991	-0.953178	0.186644
100243547	37.59	20.11	30.3033	101.123	83.6133	50.49	35.27	55.0267	38.08	48.33	-0.58409	0.546917	-0.239215	0.960578	-0.838849	0.000824935	1.50554	2.57392e-10	0.639724	0.41946
100243595	0.32	3.12667	3.76333	0.196667	0.0966667	3.125	2.61667	0.68	0.26	0.213333	-3.35561	0.0999786	0.527615	0.841126	2.49814	0.00237941	-0.314873	0.940001	-1.68157	0.780685
100243604	8.405	14.8667	21.8933	34.1033	29.24	29.89	23.8133	22.2667	27.1433	29.3	-1.91686	0.00615289	-0.250601	0.876741	-0.000708392	0.999499	0.424766	0.048155	-0.183497	0.888426
100243627	19.59	42.4067	20.99	18.6333	20.5833	31.695	52.6033	54.2233	41.8967	13.0233	-0.833003	0.540964	-0.112569	0.973999	-1.3369	0.00216155	-1.07699	1.95459e-05	0.804123	0.626434
100243643	26.795	602.603	956.193	1368.77	867.61	1415.29	1214.4	1324.03	736.453	956.093	-5.92635	4.0176e-20	-0.702457	0.584291	-0.455813	0.271253	0.985748	0.358383	-0.182619	0.90476
100243645	7.83	0.55	0.26	0.0166667	0.02	0.295	0.346667	0.233333	0.0833333	0.0333333	4.51508	5.58113e-05	1.04105	0.415244	0.167146	0.979719	-2.17564	0.559187	-0.861158	0.913264
100243668	31.335	2.88333	4.75667	3.52	1.84667	3.32	2.44333	3.4	13.3033	7.38	3.01569	0.00268215	0.515814	0.941547	0.530765	0.87482	-1.79778	0.0131968	-1.79815	0.488124
100243675	1.475	0.946667	0.0533333	0.0333333	0	0.99	0.266667	0.01	0.0366667	0.68	0.378775	0.958143	2.42089	0.153574	1.96837	0.915722	0.11259	0.987842	-7.30216	0.00880399
100243678	4.155	2.04	7.78667	41.0233	71.9133	2.835	6.2	12.6333	13.5067	22.2867	0.417702	0.72469	-1.24166	0.00845009	-0.696975	0.317624	1.70083	1.02988e-10	1.82503	0.0774221
100243698	122.75	126.4	169.277	66.2433	54.43	70.45	73.59	65.0467	129	115.83	0.69405	0.649511	1.23192	0.0282266	1.38929	1.8931e-08	-0.861941	0.00048058	-1.19792	0.0427806
100243742	26.465	88.94	28.7633	1.39	1.29333	15.375	15.9667	15.7167	10.0967	1.23333	0.580737	0.771669	2.85104	6.40425e-07	0.919906	0.81758	-2.75629	3.68275e-09	-0.0546178	0.985771
100243757	15.245	3.48333	4.24	0.593333	0.256667	2.73	8.12	10.8433	10.94	0.84	2.40671	0.08019	-0.974613	0.578712	-1.34334	0.0253447	-4.12323	1.08354e-08	-1.67134	0.269517
100243763	29.13	10.73	11.2767	11.1333	5.29	14.23	21.3267	15.0233	12.0267	20.0033	0.819299	0.680545	-0.555026	0.626803	-0.394052	0.633096	-0.0253716	0.98504	-1.87188	0.000230779
100243785	6.85	0.893333	0.43	0.363333	0.336667	0.815	0.766667	0.643333	0.383333	0.643333	2.90884	0.000104788	0.589919	0.748937	-0.561841	0.830997	0.0275474	0.987676	-0.817446	0.765533
100243808	4.09	2.97333	1.46667	7.53333	3.16333	8.97	6.73	4.94667	3.02	2.84667	-1.30812	0.546232	-0.873404	0.304149	-1.72527	2.19752e-05	1.39824	0.10112	-0.0966215	0.948713
100243827	9.665	3.40333	3.35667	1.69333	1.05	5.7	3.62	1.36667	2.68	1.66333	0.676696	0.728703	0.276944	0.909256	1.31367	0.00639402	-0.562379	0.424358	-0.764315	0.379125
100243842	1.135	27.9667	43.73	63.65	31.8833	18.125	31.27	74.1867	45.4667	24.97	-4.13734	3.77897e-08	0.193726	0.921088	-0.735428	0.0372158	0.5835	0.31784	0.0669853	0.969575
100243854	171.29	11.62	2.25	0.356667	0.0833333	24.605	5.82333	1.62333	0.566667	0.103333	2.65299	3.28759e-10	1.22823	0.297513	0.545979	0.866768	-0.493722	0.903457	-0.427042	0.935836
100243857	61.295	68.12	121.05	143.043	87.6367	79.86	98.2367	83.7233	75.8967	75.3133	-0.541132	0.526638	-0.246478	0.874023	0.537369	0.292244	1.01047	1.83877e-05	0.207559	0.815028
100243863	45.895	130.383	251.94	173.453	184.857	152.785	219	201.423	189.953	84.97	-1.83853	0.130948	-0.496511	0.733283	0.347905	0.247787	-0.0296509	0.940001	1.09531	1.02665e-06
100243866	0.83	0.19	1.7	13.07	13.6767	0.29	0.12	0.473333	2.12	9.35	1.51545	0.771336	1.43584	0.878368	1.89119	0.188088	2.73277	9.53551e-05	0.594728	0.565328
100243875	3.015	1.38333	1.61	5.08	3.77667	2.48	2.01667	3.16333	2.00667	3.66	0.132223	0.969271	-0.250387	0.943424	-0.954171	0.011578	1.43586	1.14585e-05	0.129447	0.935836
100243943	13.785	11.23	8.55	3.74333	1.60333	5.845	8.16667	6.28	5.46	5.92333	1.03765	0.617736	1.06161	0.521168	0.448339	0.497662	-0.442551	0.783317	-2.07599	0.00880399
100243949	4.77	12.66	9.19333	22.32	14.7333	11.74	12.9967	23.71	23.6767	24.3033	-1.40583	0.225159	0.280903	0.853838	-1.35321	9.24337e-11	0.00512686	0.99047	-0.743872	0.14159
100243953	172.725	159.03	91.5267	28.0233	6.63	224.81	123.117	43.74	10.4067	3.51	-0.52808	0.334264	0.647132	0.566015	1.08774	0.00606063	1.53183	0.411925	0.64303	0.776375
100243965	59.605	16.1133	21.5667	6.32667	3.11	27.66	25.75	6.23333	5.24667	6.41333	1.08511	0.806556	-0.241284	0.946184	1.80055	0.000186158	0.363692	0.940001	-1.22216	0.46911
100243983	321.37	761.71	98.04	69.03	44.53	195.97	124.833	181.047	208.083	108.883	0.59024	0.744238	3.30703	0.0228696	-0.852423	5.01411e-05	-1.48538	3.20497e-05	-1.43553	0.038975
100244014	1.54	18.6433	26.2067	12.6533	9.45333	10.77	16.66	13.4367	28.5767	16.9567	-2.9539	0.0014628	0.492818	0.740443	0.98213	8.5672e-06	-1.07953	7.71382e-19	-0.973068	0.145248
100244027	16.425	253.783	366.723	489.643	468.57	210.885	340.887	391.25	521.577	512.037	-3.83403	7.48759e-06	0.0602932	0.973999	-0.0740772	0.957097	0.00369853	0.993561	-0.147399	0.836042
100244032	1.495	0.0866667	0.0966667	0.0333333	0	0.06	0.04	0.03	0.0333333	0.00666667	5.19295	0.000508473	1.47799	0.766898	1.39484	0.82078	0.14023	0.986771	-1.02622	0.935836
100244038	0.545	8.69667	6.04	4.89667	2.89	3.72	2.47667	2.38	1.77667	2.62	-2.85071	0.00996994	2.05124	0.00277959	1.35612	0.0032892	1.56211	0.00133706	0.266869	0.912418
100244046	6.69	0.513333	0.326667	0.373333	0.46	0.485	1.21667	0.293333	0.77	0.516667	3.58799	0.000391143	-0.875073	0.553256	0.17318	0.970121	-0.950375	0.330127	-0.219317	0.904476
100244049	70.05	126.767	39.0933	58.4633	60.0933	54.24	48.4333	41.2567	26.5733	72.4233	0.225042	0.921117	2.0854	0.159468	-0.0606536	0.986023	1.23102	5.3135e-06	-0.798063	0.778785
100244061	0.195	0.38	0.213333	1.96333	2.06667	0.17	0.296667	0.536667	2.64	8.59	0.0423153	0.995527	0.94219	0.842454	-1.3331	0.718204	-0.33989	0.898954	-1.98523	0.00372561
100244078	0.565	0.196667	0.0433333	0.606667	0.74	0.92	0.62	0.353333	3.93	17.9067	-0.690747	0.931035	-1.08468	0.836414	-3.02582	0.0408414	-2.61624	0.352404	-4.51314	1.50997e-12
100244103	6.445	89.0967	97.4867	24.8333	18.93	20.93	52.3267	85.13	73.0133	20.3167	-1.89288	0.21859	1.21066	0.0968694	0.189208	0.970121	-1.4541	1.11326e-09	-0.146577	0.891117
100244128	2.38	1.35667	0.41	0.736667	2.24	1.23	0.593333	1.02333	0.473333	0.34	0.792049	0.825863	1.65123	0.0742922	-1.26994	0.290817	0.76752	0.527005	2.6513	0.000475047
100244130	34.675	90.4767	72.2133	162.087	30.1467	36.19	30.75	58.33	55.57	59.7533	-0.117926	0.964466	2.04719	0.160907	0.3293	0.970121	1.63942	7.13749e-05	-1.33205	0.281897
100244140	2.26	462.1	408.497	443.257	614.637	365.395	517.38	468.873	365.62	288.967	-7.62305	5.13702e-06	0.381471	0.946184	-0.126109	0.988782	0.381106	0.897926	0.59291	0.853293
100244146	14.46	9.21333	12.9067	5.61333	3.15667	15.59	8.41667	5.03667	7.92	5.70333	-0.177963	0.949012	0.584948	0.652681	1.37076	0.00560342	-0.397928	0.47839	-0.978238	0.340851
100244149	18.695	0.416667	0.206667	0.213333	0	0.71	0.493333	0.346667	0.203333	0.19	4.5348	2.36793e-06	0.125749	0.973999	-0.731979	0.967639	0.138961	0.976618	-3.84167	0.56213
100244155	87.19	76.11	36.5533	408.133	499.733	96.575	54.0133	141.357	292.963	317.133	-0.367211	0.927747	1.04536	0.428102	-1.92449	7.42934e-08	0.582703	0.283046	0.584202	0.142002
100244163	3.46	2.76333	9.25333	22.17	15.72	8.88	11.2867	21.7667	15.76	16.9	-1.48838	0.461075	-1.65775	0.00456768	-1.20875	1.23994e-05	0.588568	0.0142206	0.00180597	0.998684
100244220	0.28	0.283333	0.333333	3.98333	0.636667	1.155	0.313333	1.43	0.06	0.986667	-2.28127	0.509416	0.160793	0.973999	-2.21355	0.0720965	6.15828	0.000739812	-1.03387	0.722446
100244240	35.57	6.28667	3.99333	1.58667	1.77667	6.09	4.81667	3.02667	1.39333	1.56667	2.4207	1.15391e-08	0.782674	0.36643	0.414976	0.79066	0.277739	0.843759	0.0331526	0.985333
100244274	2.455	0.103333	0	0	0	0.13	0.0266667	0	0	0	4.05376	0.00176149	2.54977	0.621298
100244283	16.36	9.48	6.37333	2.91333	1.71	7.07	12.2633	7.76667	7.42333	6.05667	1.10646	0.294214	-0.0306143	0.973999	-0.283048	0.819628	-1.26911	0.0416047	-2.00184	0.0018411
100244302	3.56	1.65333	2.83	7.14333	4.9	5.07	3.35	2.77333	3.65333	4.31	-0.710592	0.556568	-0.742441	0.44523	0.00766725	0.999362	1.03884	0.000119806	0.0894384	0.935836
100244332	6.29	0.193333	0.0666667	0.14	0	0.22	0.0266667	0.0266667	0.0133333	0.0133333	4.72176	1.22386e-06	3.57526	0.402532	1.36982	0.943328	3.35392	0.592987	-1.02622	0.935836
100244346	0.025	0.0533333	0.21	12.4867	26.4433	1.25	3.24667	7.56333	2.65	3.75667	-5.73322	0.044862	-5.48139	2.87133e-05	-5.13936	3.01457e-10	2.32726	0.000173592	2.24011	0.371263
100244353	8.81	3.03	4.19667	0.416667	0.0566667	4.98	1.75333	0.543333	0.473333	0.0333333	0.838122	0.889348	1.33099	0.427386	2.95716	0.00177679	-0.0757222	0.986771	0.434021	0.941643
100244374	19.31	12.3067	15.5967	9.21	1.80333	44.355	23.7867	10.9567	13.8633	27.2	-1.31784	0.772704	-0.532678	0.580132	0.538291	0.733735	-0.50647	0.919847	-3.87254	1.17199e-10
100244376	57.05	53.8533	0.59	0.373333	0.213333	2.86	2.19667	1.61667	0.74	2.25333	4.28205	0.00410273	5.3489	0.0500477	-1.51773	0.345377	-0.982853	0.720321	-3.67093	0.179465
100244393	8.075	5.44	9.08	4.41	5.25667	5.325	6.11333	7.92333	9.78333	4.77333	0.452052	0.719836	0.0639672	0.973999	0.230247	0.806484	-1.07538	1.54967e-06	0.202614	0.935836
100244402	22.79	50.8133	66.1033	10.5067	8.61333	50.72	43.43	19.3367	14.6433	6.09333	-1.26232	0.0772259	0.444645	0.871483	1.79618	6.65777e-06	-0.377589	0.696424	0.318503	0.867932
100244435	4.02	3.17667	3.15333	1.65667	2.24333	3.655	4.73	3.42	3.90333	2.36667	-0.0265208	0.993854	-0.184682	0.960578	-0.107691	0.970121	-1.11657	0.00129062	0.0434633	0.98776
100244451	20.495	24.06	19.0133	11.67	14.6167	9.49	25.61	25.1367	37.5	17.37	0.948365	0.272612	0.187179	0.960578	-0.392461	0.63605	-1.5838	2.86009e-15	-0.197037	0.889932
100244467	7.4	0.676667	0.603333	0.07	0.0366667	0.185	0.143333	0.173333	0.0866667	0.0333333	5.12443	0.000184844	2.69563	0.0675895	1.77813	0.48136	-0.1685	0.984248	0.0526496	0.994757
100244488	1.7	0.00666667	0	0.0266667	0.01	0.01	0	0	0.01	0.02	8.23681	0.00949976					1.61757	0.903457	-0.064441	0.994757
100244514	164.22	19.3233	12.5267	2.24667	0.92	14.995	8.54	4.37	3.90333	2.61333	3.34138	0.00244525	1.48647	0.000288841	1.53801	0.00105463	-0.716952	0.637692	-1.59362	0.0455437
100244520	3.365	2.16667	6.38	19.1967	55.2733	9.845	13.13	16.07	21.3533	14.28	-1.61144	0.26313	-2.1923	0.00248811	-1.32778	0.0613287	-0.0605257	0.945991	1.92397	0.00231787
100244525	10.425	0.436667	0.43	0.05	0.04	0.39	0.12	0.06	0.143333	0.546667	4.57738	3.73705e-05	2.1438	0.231068	2.89478	0.0871455	-1.4501	0.705625	-3.74185	0.0776768
100244565	10.185	7.82333	8.11667	5.02	2.32667	10.71	8.90333	8.09	7.18	4.68333	-0.223354	0.897661	0.194028	0.902257	0.01761	0.999166	-0.418973	0.228898	-1.08288	0.00170413
100244608	10.25	63.8	50.7067	12.1267	2.47333	89.675	56.7833	21.6267	14.1067	5.43333	-3.13785	0.0497445	0.530863	0.427386	1.25207	0.000538576	-0.110379	0.942351	-1.61855	0.401522
100244609	50.09	26.6733	21.0333	2.18	1.47333	22.005	30.35	28.4533	21.2833	3.11667	1.09547	0.439796	0.0566921	0.973999	-0.417998	0.362482	-3.19752	3.06332e-13	-1.07936	0.155797
100244631	0.285	0.33	0.553333	3.01333	11.1833	2.76	2.18333	1.17	0.366667	0.363333	-3.27813	0.167208	-2.47229	0.0550409	-1.10817	0.704724	3.11198	0.000287509	4.93893	5.43901e-27
100244679	38.145	44.56	16.0433	3.76	2.61333	22.615	15.6133	19.76	9.61333	4.60667	0.57538	0.624689	2.02462	0.00714752	-0.269554	0.853137	-1.24822	0.00354267	-1.08017	0.402301
100244704	52.515	14.0033	18.96	2.58	0.446667	10.84	8.09667	10.49	18.82	5.22667	2.13084	0.504574	1.20798	0.104037	0.864855	0.498846	-2.75789	1.30578e-09	-3.55431	6.25828e-07
100244737	23.365	52.28	12.1433	3.79	2.17333	17.345	23.0333	15.23	10.8667	2.86667	0.198221	0.946345	1.52658	9.35535e-06	-0.290382	0.970121	-1.41861	0.00890678	-0.511167	0.707276
100244741	9.64	8.81667	6.70667	2.41667	2.69667	5.335	8.84	8.08667	6.37667	4.14	0.706995	0.330045	0.435861	0.704933	-0.254274	0.509018	-1.30609	6.6551e-05	-0.804396	0.398984
100244758	0.505	0	0.4	7.63333	1.21	0.295	0	2.89	0	0.573333	0.437298	0.977129			-2.75789	0.210132	22.2915	1.0199e-06	1.28122	0.854467
100244768	3.3	9.16667	7.51	7.64	5.91667	1.775	3.76333	5.44333	4.54333	4.41	0.738572	0.853473	1.61417	0.00922272	0.461527	0.852792	0.851378	0.10374	0.0470039	0.987029
100244770	4.91	37.7867	7.63333	5.57333	3.29	31.225	15.5667	9.11667	3.47	9.71667	-2.80706	5.44805e-08	2.04134	0.315243	-0.235828	0.77877	0.773419	0.194571	-2.16615	0.307172
100244850	2.015	0.146667	0.01	0.01	0	0.12	0.113333	0.04	0.01	0	3.88401	0.000882493	0.855182	0.889577	-1.85177	0.930948	0.147292	0.986771
100244894	0.22	0.9	1.21667	1.04	0.596667	0.31	0.793333	0.776667	1.21	1.44	-0.665715	0.856342	0.619083	0.746935	0.656505	0.331841	-0.119838	0.92791	-1.2975	0.00305976
100244905	26.505	5.61	4.72333	2.31667	1.67667	3.39	4.55	3.78667	2.81	2.65667	2.78397	0.00582902	0.763116	0.455105	0.325139	0.65041	-0.181001	0.883752	-0.875055	0.371298
100244941	11.955	0.463333	2.01	24.47	16.06	2.595	6.13333	6.58333	4.74333	2.79667	2.01066	0.0639812	-3.25639	0.011003	-1.67167	0.0147775	2.46169	2.98632e-16	2.2209	0.0132121
100244957	8.8	3.15333	3.13333	13.4533	15.4	7.47	12.9333	7.16333	16.07	13.86	0.106584	0.964756	-1.68465	3.22562e-08	-1.2079	0.136061	-0.163436	0.776367	0.110092	0.926256
100244962	289.21	97.4767	44.3033	11.2133	4.70667	93.69	22.84	19.3367	9.23	5.12333	1.51491	0.282408	2.61775	0.0019243	1.21872	0.0552191	0.378471	0.796705	-0.523899	0.852374
100244964	28.665	33.2067	89.24	339.61	447.593	47.355	119.263	225.687	363.547	360.227	-0.917563	0.476423	-1.46429	0.013086	-1.31197	0.000139957	-0.00286484	0.994624	0.347892	0.669951
100244987	24.85	20.19	34.6333	19.3133	18.4933	18.77	19.1467	23.6733	19.7267	8.56667	0.243027	0.898713	0.429518	0.774059	0.574424	0.0716575	0.066762	0.903457	1.06292	0.000281913
100245004	21.645	9.87333	4.42	9.30667	12.3467	16.21	22.1467	12.23	8.21333	4.47667	0.298571	0.946345	-0.649997	0.754622	-1.45397	9.53902e-08	0.261264	0.852137	1.2472	0.112105
100245019	18.045	15.48	5.99333	0.88	0.443333	7.33	3.84333	0.716667	0.28	0.283333	1.15406	0.0690926	2.18306	0.0797254	3.06844	3.13068e-06	1.76805	0.0668039	0.548316	0.76749
100245028	9.735	2.49333	1.63333	1.18	0.75	2.83	3.04	1.14333	1.88	1.43	1.63571	0.00673135	0.142041	0.960578	0.528242	0.805791	-0.572516	0.253413	-1.11628	0.275211
100245036	17.09	1.11667	1.47	1.59	1.87	2.105	2.52333	0.976667	1.06	1.39333	2.88907	3.28257e-13	-0.836726	0.445076	0.608551	0.52526	0.685888	0.120739	0.37793	0.724638
100245075	18.45	5.61	2.9	7.02667	9.05	13.54	7.56	4.59	3.09667	9.47333	0.263723	0.943971	0.136528	0.973999	-0.639202	0.718857	1.28047	0.000209272	-0.377	0.873012
100245103	0.015	0.0333333	0.03	6.85	27.3667	0	0.123333	0.263333	0.506667	13.3167	1.37875	0.946345	-1.73681	0.862832	-3.09718	0.193041	3.84783	0.00810287	1.12532	0.189747
100245120	17.42	21.4467	27.2667	27.7467	30.9567	34.145	31.5867	22.93	19.9467	26.0267	-1.08858	0.00958222	-0.107865	0.960578	0.277588	0.446822	0.562189	0.00371593	0.0861377	0.935836
100245127	5.635	0.493333	0.413333	0.03	0.01	0.185	0.163333	0.06	0.1	0	4.78106	0.00110954	2.06396	0.254797	2.77406	0.194555	-1.59309	0.637624	0.897332	0.935836
100245132	2.56	3.57333	13.72	10.0167	5.75	13.465	10.2333	9.31333	3.64	3.15333	-2.48113	0.00456338	-1.25967	0.132218	0.591939	0.236249	1.5588	1.51344e-09	0.80577	0.0804957
100245139	4.165	1.87667	0.686667	0.663333	0.966667	1.905	1.43667	1.92	0.973333	0.41	0.890139	0.864588	0.710537	0.648146	-1.51556	9.84032e-05	-0.39563	0.767824	0.964079	0.545889
100245165	13.405	11.66	15.9433	14.7	6.36	41.475	17.7467	13.9167	14.3433	16.09	-1.90599	0.408738	-0.224674	0.908421	0.20485	0.904812	0.135009	0.880413	-1.33644	0.00381043
100245181	0.5	0.123333	0.203333	7.31333	0.306667	0.715	0.27	1.84333	0.0166667	1.14	-0.797656	0.946345	-0.650312	0.939312	-3.24799	0.00277059	9.18405	0.0631566	-2.54647	0.427306
100245197	69.495	47.5467	60.1433	70.9433	47.41	103.425	69.7133	49.97	32.4967	32.6133	-0.701723	0.169613	-0.26109	0.837993	0.283924	0.739319	1.21859	2.62832e-08	0.256526	0.896114
100245212	38.325	5.6	10.1333	6.38	5.30667	9.465	6.24333	6.45333	6.5	3.57667	1.86882	0.00772513	0.22996	0.927698	0.667007	0.205089	0.0736127	0.940001	0.551128	0.497039
100245214	11.435	0.976667	2.97333	9.16	8.52333	1.01	1.87333	1.37333	1.83667	2.97333	3.3203	0.0597064	-0.372442	0.960578	1.13007	0.399215	2.42181	4.9853e-08	1.49342	8.22786e-05
100245229	5.41	0.16	0.0133333	0.05	0.03	0.045	0.12	0.0366667	0.08	0.0666667	7.42263	0.0069496	0.531107	0.960578	-1.84144	0.967639	-0.693146	0.882293	-1.318	0.837077
100245243	61.38	46.7933	63.3467	30.2633	56.8367	49.26	73.2533	28.6733	91.6467	111.487	0.164325	0.964191	-0.249553	0.937425	1.18304	0.38121	-1.50136	1.0413e-07	-0.861897	0.46116
100245260	12.155	1.68667	2.27333	3.47	2.87333	4.405	3.06667	2.40333	1.31	1.62667	1.29411	0.404868	-0.529295	0.835736	-0.0626143	0.991396	1.51639	0.00749653	0.917007	0.527914
100245269	3.37	9.16667	5.16333	24.51	69.0767	11.825	7.40667	11.2033	15.4433	30.91	-1.91153	0.116107	0.997707	0.711414	-1.10331	3.47649e-07	0.758919	0.0637723	0.859958	0.454908
100245282	16.335	0.283333	0.446667	1.18333	0.98	1.5	1.41333	0.0266667	0.23	0.703333	3.21359	0.12702	-2.08566	0.274438	4.09943	0.0148768	2.56639	0.00560995	0.288458	0.904476
100245304	26.835	17.6967	3	0.2	0.05	8.07	4.49	1.14	0.71	0.283333	1.52887	0.155667	2.3879	7.17762e-10	1.40206	0.268344	-1.73747	0.089532	-2.54521	0.132385
100245339	3.01	2.34667	5.92667	7.08	6.54667	4.615	7.68667	5.5	6.4	7.15667	-0.767448	0.355368	-1.37429	1.41127e-06	0.117413	0.964795	0.240572	0.339329	-0.29141	0.780064
100245348	3.32	0.736667	0.243333	0.0966667	0.0166667	0.58	0.24	0.00666667	0	0	2.37418	0.000797416	2.0148	0.0256404	4.97605	0.152067	4.71216	0.252879	1.80606	0.904476
100245359	9.195	7.50333	11.5233	20.75	19.7967	12.165	14.32	16.9867	8.8	12.4333	-0.580234	0.706765	-0.546488	0.626803	-0.537487	0.0497629	1.33391	2.72023e-07	0.631799	0.0508704
100245433	15.525	10.4033	7.34	4.25333	1.47333	9.365	12.6333	5.52333	4.23	11.99	0.664476	0.793124	0.29859	0.950424	0.413138	0.774669	0.0939163	0.943317	-3.23554	1.14879e-05
100245440	32.46	3.28667	2.23	2.03333	0.106667	2.125	3.73333	1.87	1.77333	1.62	3.88612	0.109796	0.292953	0.934934	0.25851	0.930948	0.254661	0.940001	-4.26773	0.00671169
100245463	5.745	6.85333	4.64	4.41	1.89667	7.465	7.72667	5.34667	4.87333	4.76667	-0.497807	0.631176	0.229536	0.883649	-0.187745	0.887132	-0.0475709	0.940001	-1.40953	0.000105826
100245471	0.54	0.4	0.36	0.116667	0.06	0.225	0.17	0.356667	0.45	0.32	1.08589	0.664361	1.6726	0.131464	0.0351254	0.998188	-1.79661	0.00233516	-2.31992	0.064051
100245479	0.15	1.09333	3.05667	0.88	0.36	0.325	1.41	2.16	3.24667	2.18	-1.16978	0.869599	-0.0259048	0.987873	0.488503	0.833646	-1.76784	0.12381	-2.6208	0.00351397
100245483	24.26	9.47667	9.64333	4.42333	2.38667	6.12	9.39	19.8333	15.7067	6.85	1.8333	0.133577	0.543843	0.793327	-1.02778	0.165693	-1.74274	0.00142854	-1.85055	0.173349
100245527	508.545	89.2233	66.7167	24.54	5.80333	28.465	60.3633	32.2433	29.7767	63.78	4.14378	0.00958222	1.16327	0.520254	1.06609	2.9423e-07	-0.208786	0.952749	-3.9392	0.000773214
100245533	39.25	60.6533	34.96	13.93	12.16	10.045	24.5267	13.7067	39.0167	38.4467	1.83072	7.78417e-07	1.79238	0.0145387	1.35163	0.0244086	-1.39249	3.23051e-06	-2.0019	0.0742026
100245593	380.6	395.367	333.647	172.207	145.187	289.17	411.073	332.59	384.573	218.26	0.289676	0.912007	0.326973	0.677286	0.0339246	0.970121	-1.05507	5.52649e-06	-0.749767	0.321375
100245595	132.57	53.8233	38.97	47.39	71.1233	88.77	44.9333	42.24	20.7633	23.0733	0.507425	0.845072	0.572421	0.56705	-0.102082	0.947349	1.28876	1.73027e-06	1.4855	0.00119052
100245600	22.005	2.17667	2.07	0.816667	0.523333	4.135	2.79667	2.08667	1.31333	0.716667	2.29463	0.000297997	0.00730736	0.996032	0.00152457	0.999362	-0.629328	0.737565	-0.870819	0.772062
100245622	150.835	425.377	145.597	80.1533	110.473	159.46	174.003	196.423	198.98	143.057	-0.261514	0.912007	1.92148	0.0959893	-0.409861	0.0511531	-1.21601	1.34773e-11	-0.639364	0.585324
100245706	31.91	3.84333	5.48333	4.57667	3.09	6.355	1.64	1.94	1.75333	2.00667	2.21491	0.0011587	1.88581	0.225261	1.52011	0.104077	1.48335	0.0143461	0.43359	0.757074
100245718	21.145	26.4467	40.8667	48.0733	43.54	42.66	40.05	43.5467	41.05	50.0233	-1.1577	0.00593147	-0.130714	0.960578	-0.069529	0.970121	0.323299	0.0206	-0.307096	0.576571
100245740	34.445	7.62	4.81	1.57333	1.81	3.77	5.77333	6.16667	7.72333	1.68	2.88455	8.00563e-10	0.696684	0.486408	-0.408724	0.602422	-2.3084	1.18727e-06	0.018822	0.994757
100245760	0.075	0.246667	0.276667	0.336667	0.876667	0.105	1.06667	0.716667	2.80667	2.72333	-0.743022	0.946345	-1.74367	0.198336	-1.37261	0.33152	-2.96847	0.00108888	-1.58807	0.0708235
100245763	1.63	3.39	0.36	0.66	0.236667	3.8	2.72333	0.863333	0.893333	2.98667	-1.41377	0.492861	1.00972	0.715616	-1.25688	0.0756422	-0.328315	0.838553	-3.79444	4.30413e-07
100245765	1.025	2.20333	1.98333	3.30333	2.9	2	2.65333	2.57667	1.66	2.42	-1.08859	0.277802	0.0551221	0.973999	-0.362979	0.64997	1.0831	0.00945624	0.14728	0.886072
100245801	18.84	2.09	1.29667	0.153333	0.09	0.625	0.6	0.26	0.293333	0.46	4.85323	2.09327e-07	2.32193	0.015368	2.3372	0.00047758	-0.846947	0.673406	-2.77006	0.209425
100245827	3.56	2.55	0.03	0.04	0.05	1.27	0.11	0.07	0	0	1.32626	0.82177	5.22901	0.000500076	-1.15198	0.964317	2.99395	0.77651	3.10419	0.732634
100245840	20.385	2.61	3.61667	2.18333	1.29	5.63	3.80333	3.31667	5.71333	3.16333	1.73057	0.0605757	-0.17632	0.945748	0.132227	0.970121	-1.28956	0.000984962	-1.22939	0.179465
100245856	171.75	526.423	604.27	677.087	594.837	364.765	519.23	461.933	183.173	160.813	-1.26449	0.0674784	0.238843	0.953655	0.399948	0.679172	1.98306	1.78194e-16	1.92305	0.00465385
100245859	83.365	46.9467	82.2833	27.7033	19.89	87.785	36.3733	26.0167	28.3733	16.3467	-0.162695	0.946345	0.579975	0.765024	1.68652	1.41436e-07	0.0648051	0.940001	0.308196	0.801514
100245884	45.95	18.0067	15.6633	12.75	12.78	13.225	14.8667	14.7733	12.9833	10.9233	1.64712	0.00277152	0.748159	0.449225	0.101574	0.970121	0.0743778	0.936505	0.122018	0.904476
100245885	1.065	803.157	1501.92	1759.88	1298.66	748.15	1774.66	1902.94	836.98	318.543	-9.56017	1.65348e-11	-0.795669	0.42067	-0.317031	0.242666	1.16365	0.000292502	1.63823	0.181974
100245897	134.33	12.6033	5.67	2.88667	2.39	2.085	6.7	10.5267	11.4367	1.07333	5.7781	0.00449389	1.21043	0.323839	-0.861865	0.354936	-1.91066	9.6299e-06	1.34085	0.568489
100245904	74.9	18.89	12.07	32.2867	25.84	22.05	30.3333	26.4133	28.3933	28.6733	1.5385	0.33197	-0.176007	0.960578	-1.11042	0.00345118	0.285213	0.42359	-0.362725	0.815824
100245905	100.945	8.11333	7.33	9.86667	10.6	7.995	14.74	9.46	13.7067	13.8	3.58437	6.32751e-05	-0.389694	0.885278	-0.362552	0.900812	-0.386746	0.679643	-0.311378	0.831078
100245906	12.885	11.4333	2.46	0.123333	0.0466667	8.725	1.75	0.263333	0.213333	0.186667	0.45306	0.885301	3.14509	1.03369e-05	3.2256	0.00599959	-0.681965	0.880413	-2.50027	0.398984
100245911	25.895	114.633	19.95	11.45	3.30667	106.94	136.947	61.03	16.65	5.60667	-2.15376	0.160929	0.269427	0.940607	-1.58953	0.00231747	-0.442797	0.880413	-1.30078	0.587742
100245914	78.91	49.1733	203.823	91.6767	111.48	47.565	87.4	156.693	221.75	153.06	0.57445	0.719014	-0.57041	0.763591	0.380183	0.773527	-1.1657	0.00521342	-0.333151	0.877319
100245940	31.445	26.1433	20.7367	18.28	9.09333	39.78	24.01	18.7267	25.8233	18.2067	-0.501275	0.598791	0.474381	0.311154	0.174822	0.951599	-0.41426	0.558558	-1.05688	0.00727025
100245945	73.93	64.9433	43.7833	10.6333	9.42333	139.205	21.46	11.9133	12.02	9.55333	-0.915131	0.793124	1.96362	0.00103756	1.90121	7.36312e-17	-0.0804621	0.940001	-0.458614	0.867932
100245950	7.6	2.85667	1.97667	1.05333	0.88	1.285	2.53	0.856667	2.52667	2.45667	2.4556	0.00110954	0.583333	0.812069	1.23003	0.0676158	-1.17604	0.0419569	-1.8021	0.0749428
100245970	49.85	16.38	16.94	39.9867	36.58	64.26	45.5067	35.6167	21.3667	30.4667	-0.53797	0.750938	-1.10559	0.00296784	-1.04822	7.64526e-08	1.00168	9.48125e-12	0.227249	0.701172
100246006	2.29	0.283333	0.316667	0.183333	0.0733333	0.445	0.603333	0.5	0.903333	0.553333	2.18838	0.51229	-0.830756	0.716944	-0.77279	0.762297	-2.25475	0.0297027	-3.35124	0.00672766
100246023	262.005	78.8867	17.3533	76.2033	24.6533	149.035	110.723	77.3167	33.3633	16.08	0.610656	0.791813	-0.213557	0.960578	-2.10839	0.0547192	1.2911	0.00018213	0.764879	0.664217
100246026	1.12	2.58333	1.01333	0.13	0.5	0.505	0.333333	0.166667	0.24	0.29	0.967889	0.676979	3.54961	0.000307668	2.59464	0.0028644	-0.780055	0.669855	0.409286	0.904476
100246027	164.645	222.33	106.39	35.42	24.8167	164.24	56.03	45.22	43.9233	34.99	-0.0671418	0.982877	2.40209	3.13456e-11	1.26422	2.23467e-05	-0.212985	0.762621	-0.841219	0.566681
100246081	2.975	2.29333	2.85	0.736667	0.88	1.91	2.64667	2.06	2.04333	0.91	0.440993	0.897498	0.105222	0.971076	0.485401	0.308064	-1.37395	0.0012973	-0.0408929	0.97595
100246087	39.625	56.9533	142.413	134.63	204.023	134.565	122.407	133.587	91.9033	92.6267	-1.87353	0.0297852	-0.813018	0.146318	0.127773	0.970121	0.646344	0.0331879	1.05229	0.000123645
100246094	0.73	0.406667	0.126667	0.01	0.0433333	0.23	0.41	0.266667	0.49	0.2	1.56784	0.828011	0.203047	0.973999	-1.08467	0.78315	-5.30697	0.00511491	-2.27519	0.491486
100246096	6.47	68.18	46.5833	39.95	30.4	23.835	44.37	26.4267	20.5667	48.1867	-1.96525	0.461496	0.978687	0.634875	0.849807	0.0158665	1.05678	0.00160268	-1.0985	0.541624
100246130	29.215	30.6967	35.92	18.7267	15.2867	18.12	30.0167	40.08	40.15	27.84	0.531151	0.632484	0.426043	0.765024	-0.140096	0.897313	-1.00465	0.00128667	-0.888302	0.173448
100246131	3.39	14.7333	22.2033	11.9633	3.8	28.5	12.51	19.7167	18.61	5.59	-3.28236	8.00563e-10	0.418538	0.889577	0.148731	0.959211	-0.509553	0.0426462	-0.533	0.731786
100246157	4.535	5.47	4.82	3.67	4.99667	2.41	7.5	6.3	11.7433	8.05667	0.79554	0.630814	-0.12117	0.960578	-0.384973	0.659831	-1.60118	0.000149037	-0.78785	0.0976002
100246165	14.34	16.67	27.8233	43.6967	44.9367	28.845	31.1867	35.4567	42.37	45.7833	-1.14057	0.00699449	-0.600409	0.271675	-0.327877	0.189675	0.139867	0.537324	-0.00394874	0.995492
100246166	57.83	35.9433	16.1467	5.03	1.29667	1.68	45.6033	2.64	37.1533	43.63	5.03368	0.00129627	-0.0777236	0.973999	2.60399	8.40986e-05	-2.80758	0.0173638	-5.37583	4.24798e-07
100246179	68.355	20.9467	7.84	2.43	1.00333	18.26	12.38	7.44333	4.12333	2.17667	1.75364	0.00182694	1.24649	0.196029	0.0891911	0.970121	-0.674921	0.152023	-1.61017	0.375697
100246196	144.21	49.72	18.9067	14.4733	6.17	42.355	20.2733	9.99667	6.61667	8.56333	1.65607	0.085553	1.92878	0.180639	0.936296	0.0583797	1.22394	0.00402539	-0.996744	0.682614
100246216	83.2	59.77	93.1033	185.503	219.947	88.7	93.0733	105.52	111.807	90.3167	-0.230341	0.853473	-0.343846	0.76858	-0.163856	0.496562	0.8257	1.80742e-08	1.29367	2.44102e-05
100246223	10.88	30.0067	25.1267	3.81333	1.66667	16.505	31.88	13.7233	12.0767	6.41	-0.791606	0.559857	0.162162	0.960578	0.879917	0.05081	-1.5605	0.0076272	-1.98936	0.0027867
100246227	111.42	12.49	5.06333	4.96	10.7233	9.77	7.44333	11.8667	23.53	30.7133	3.38197	0.10982	1.29572	0.360492	-1.20486	0.275988	-2.16558	0.00158438	-1.62408	0.000999386
100246238	2.52	2.38	4.26333	2.21333	2.61667	2.94	3.29667	3.02667	4.79667	2.51667	-0.372835	0.902169	-0.253291	0.960578	0.518258	0.349263	-1.01893	0.00145461	0.00310807	0.996992
100246245	129.07	183.183	183.233	159.197	101.493	254.93	219.607	161.103	127.323	145.46	-1.11822	0.0069832	0.210634	0.948992	0.201461	0.751782	0.422148	0.248266	-0.614418	0.488665
100246283	0.165	0	0.0533333	1.51667	0.03	0	0.0166667	0.216667	0	0.0533333	4.01655	0.768107	-0.442872	0.973999	-2.28132	0.579178	20.7225	7.3223e-06	-0.919873	0.935836
100246297	13.86	42.1367	33.6467	49.68	56.7933	29.175	37.0067	35.6267	44.0633	100.06	-1.20317	0.00199893	0.818409	0.711481	-0.0716369	0.970121	0.266888	0.0996702	-1.17963	0.358565
100246301	18.78	14.5	26.2467	52.63	36.8633	18.325	20.0333	26.07	26.03	23.71	-0.148624	0.946345	-0.056898	0.973999	0.0227307	0.992811	1.10629	1.11221e-06	0.483498	0.53551
100246308	30.455	49.28	35.9533	6.65667	1.18	31.075	25.1667	11.3067	5.53667	5.23667	-0.107623	0.984517	1.3544	0.0746613	1.68894	0.000214007	0.360859	0.854535	-2.53991	0.0816599
100246362	14.25	7.00333	3.65333	12.42	26.67	14.815	15.52	9.24667	11.45	10.9367	-0.182401	0.946345	-0.779063	0.383074	-1.31447	0.0036903	0.204659	0.83148	1.08892	0.181676
100246382	84.625	26.5167	14.2267	2.20667	0.3	29.205	12.2733	4.94	5.72667	2.39667	1.42848	0.721219	1.38683	0.104345	1.55208	6.12982e-06	-1.28885	0.290743	-3.18201	0.0461097
100246392	2.885	4.44667	4.36667	4.05	2.21333	6.645	4.50667	3.81333	3.5	2.37667	-1.33012	0.00318576	0.423408	0.736328	0.207903	0.889442	0.304158	0.307585	-0.432303	0.828802
100246403	63.93	63.4433	38.56	35.95	42.27	29.17	44.33	46.6033	77.3433	75.9133	1.0087	0.0960469	1.14249	0.449226	-0.262873	0.617745	-1.01706	4.79261e-11	-1.19043	0.29412
100246409	1.745	2.38333	0	0	0	0.02	0	0	0	0.51	6.39295	0.0281473	22.643	4.98617e-06					-6.41517	0.00309861
100246418	16.47	0.483333	0.07	0.5	0	0.1	0.07	0	0.0233333	0.0233333	7.23449	6.02817e-05	3.46931	0.379045	2.50558	0.930948	4.42407	0.338141	-1.02622	0.935836
100246433	60.23	1.10667	0.283333	0.0833333	0.166667	3.785	0.366667	0.12	0.2	0.283333	3.87808	2.81603e-05	1.95515	0.49733	1.26316	0.897652	-1.17995	0.897714	-1.15469	0.83412
100246482	22.38	2.56	1.4	2.94	4.63	5.885	2.05333	1.27333	0.966667	4.79667	1.82561	0.0325699	0.787037	0.759554	0.145645	0.970121	1.69194	0.000852121	-0.40912	0.86567
100246497	4.585	2.13	2.21	0.49	0.133333	1.29	0.793333	1.16333	1.20667	1.12667	1.70086	0.136345	1.86989	0.0204464	0.933587	0.423683	-1.19794	0.215496	-3.28571	0.00860212
100246512	4.815	0.0233333	0	0	0	0.195	0.02	0	0	0	4.47006	2.28947e-07	0.365461	0.973999
100246540	2.62	0	0	0	0	0	0	0	0	0.0166667	8.04828	0.00787585							-1.02622	0.935836
100246545	0.665	2.31667	1.95333	2.14667	1.13333	1.84	1.91	1.60333	0.963333	2.38333	-1.69453	0.397084	0.595025	0.702173	0.298597	0.751116	1.25259	0.0040522	-1.04969	0.432592
100246547	1.63	9.96	12.3	27.9967	30.31	22.025	14.4067	11.5467	12.2933	23.5433	-3.87335	0.0264664	-0.118482	0.960578	0.107819	0.936584	1.2842	7.18605e-13	0.381802	0.576074
100246559	1.04	7.94	13.86	13.93	20.3733	4.78	9.35333	14.9167	34.0233	28.9167	-2.36417	0.00914166	-0.0075759	0.995745	-0.075775	0.999362	-1.18849	2.7814e-06	-0.394009	0.854481
100246583	0.175	0.15	0.106667	0.306667	0.0833333	0.08	0.116667	0.143333	0.83	1.17	1.1635	0.941987	0.846115	0.869972	-0.405595	0.970121	-1.31878	0.403082	-3.8541	0.00565744
100246611	40.61	7.99	5.06333	1.87	1.30667	9.17	5.62667	3.03333	2.56333	2.41	2.02855	0.00782803	0.926295	0.427386	0.755981	0.165339	-0.355223	0.66455	-1.1637	0.427333
100246634	9.8	0.8	0.786667	7.10667	4.77667	4.345	2.73	4.87	2.83333	1.19	1.12387	0.695387	-1.31349	0.365265	-2.60701	0.0012318	1.41126	0.225741	1.39192	0.669166
100246645	61.095	54.6867	90.6433	11.27	23.8333	15.97	10.9067	9.51667	96	53.66	1.94194	0.539203	2.68943	3.12731e-06	3.27539	1.50598e-20	-2.98028	1.92891e-12	-1.33469	0.0496837
100246662	295.23	46.8967	58.94	28.8833	23.8067	68.54	45.4	41.8833	29.3533	14.54	1.95115	0.00870498	0.333647	0.864233	0.514869	0.115376	0.0769616	0.922084	0.767907	0.306496
100246735	276.14	100.44	150.563	112.093	111.237	87.235	103.66	138.28	195.167	117.58	1.48823	0.000283422	0.271622	0.847758	0.151042	0.887227	-0.694873	2.3398e-05	-0.0614604	0.935836
100246736	0.49	0.856667	1.44333	0.42	0.77	0.245	0.643333	0.37	0.356667	0.343333	0.81371	0.803936	0.792307	0.678219	1.96078	0.000605525	0.346358	0.793109	1.03926	0.203916
100246740	65.755	36.3867	32.2967	23.02	11.05	27.285	32.5567	13.76	19.1333	28.7467	1.2308	0.723019	0.693959	0.716755	1.24805	0.00377	0.358623	0.64223	-1.71699	0.160237
100246744	2.495	18.3333	8.51333	2.56333	0.693333	14.065	16.1667	5.89	1.92333	1.58333	-2.61247	6.83029e-07	0.449385	0.81103	0.548091	0.523758	0.505538	0.929209	-1.56438	0.516914
100246754	76.36	98.3933	14.6933	10.6333	7.61333	20.925	19.7667	24.9533	14.31	13.1667	1.70098	0.00860221	3.01719	0.0311009	-0.737825	0.320943	-0.333005	0.705615	-1.2261	0.479815
100246774	0.135	0.16	1.27	2.51667	1.26667	0.915	0.583333	0.763333	0.44	2.17667	-2.98984	0.346995	-1.51405	0.517673	0.754032	0.792973	2.59407	0.00097693	-0.770545	0.62339
100246832	154.65	83.77	228.433	154.15	141.83	166.635	110.797	95.5733	168.83	139.427	-0.217611	0.927747	-0.187824	0.960578	1.26325	0.000569917	-0.0342735	0.940001	0.182298	0.935836
100246868	37.91	33.6	19.9533	24.6567	25.9067	15.97	29.7833	29.3633	54.19	56.5	1.07597	0.306807	0.746253	0.69066	-0.552882	0.258176	-1.03816	0.000168515	-1.22816	0.000487952
100246921	0.845	0.383333	0.396667	0.696667	0.4	0.715	0.51	0.36	0.28	0.336667	0.040612	0.992671	-0.11471	0.973999	0.227831	0.964476	1.42683	0.00554083	0.230232	0.892432
100246928	3.92	2.03333	2.05333	1.45667	1.63333	1.29	1.32667	1.82333	3.92333	3.55667	1.51248	0.331547	1.21209	0.579332	0.183674	0.970121	-1.3294	0.00221934	-1.0921	0.124385
100246932	0.15	3.16667	2.82667	0.763333	0.526667	0.69	1.17333	1.45667	1.87	2.91667	-2.3735	0.655432	1.75459	0.0908506	0.956728	0.630063	-1.18853	0.321083	-2.51788	0.00446565
100246938	5.485	2.94667	3.65	0.906667	0.41	1.73	1.44667	1.85667	2.36667	1.16333	1.56078	0.16997	1.26393	0.384757	0.987308	0.0525901	-1.28669	0.00560885	-1.39198	0.352559
100246945	2.325	1.15333	0.946667	0.526667	0.153333	1.26	0.966667	0.646667	0.78	0.6	0.73679	0.648779	0.63429	0.45697	0.569139	0.53485	-0.486026	0.519268	-2.03076	0.0051532
100246982	74.415	61.5333	24.0733	10.1767	6.16333	24.76	44.4	28.1233	34.23	32.2533	1.42271	0.0305422	0.958382	0.33225	-0.214818	0.800646	-1.65718	5.10063e-06	-2.6779	0.00234628
100246990	6.625	4.17333	5.03333	3.49667	1.10333	7.24	5.80667	3.93	3.30667	2.64	-0.230946	0.931035	-0.105041	0.965358	0.374708	0.600532	0.176288	0.810672	-1.3388	0.00518033
100247001	3.58	0.803333	1	0.183333	0.0266667	0.08	0.04	0.213333	0.356667	0.11	5.30034	0.00456113	4.68254	0.00196343	2.2316	0.137841	-0.855663	0.636494	-1.96984	0.657469
100247026	71.045	61.22	18.9267	14.8067	9.70333	25.18	42.3567	16.3067	38.5867	52.5333	1.30335	0.333408	1.21055	0.558052	0.234667	0.589385	-1.2876	1.92366e-06	-2.84485	0.00599904
100247044	1.17	0.19	0.756667	0.906667	1.47	0.665	0.666667	0.146667	0.11	0.12	0.575195	0.927747	-1.59708	0.379068	2.36876	0.00036485	3.15169	0.0011432	3.71421	0.000289983
100247045	9.805	2.59667	3.26333	1.57	0.756667	1.185	0.883333	1.07667	0.76	0.213333	2.89737	0.00110954	1.91499	0.210384	1.62128	0.161051	1.14587	0.318978	1.84085	0.33406
100247060	3.74	3	1.42667	1.52333	0.493333	1.685	4.24	1.92	4.42	1.55667	0.930555	0.704122	-0.197171	0.952218	-0.424254	0.78575	-1.43536	0.00419011	-1.93226	0.170139
100247063	1.5	0.43	1.77667	14.88	15.99	0.415	2.01667	6.37667	4.46667	1.80333	1.6652	0.43183	-1.80764	0.335617	-1.81427	0.085609	1.8242	0.000762698	3.01397	2.25287e-05
100247087	0.755	4.51667	0.566667	0.326667	0.0533333	7.265	3.97333	1.33	1.19333	1.05667	-3.54749	0.0950075	0.640098	0.605872	-1.21345	0.370042	-1.81023	0.377878	-4.52334	0.000823912
100247106	16.97	15.9067	35.8233	6.74667	3.19	4.93	10.8967	21.8933	41.4067	20.6833	1.61895	0.181096	0.880065	0.569528	0.709086	0.282134	-2.51323	3.38254e-14	-2.57572	0.00488551
100247111	11.625	223.89	255.887	127.577	110.237	270.34	211.057	213.997	202.863	240.787	-4.67124	2.25248e-45	0.554074	0.695901	0.294847	0.762297	-0.570388	0.248427	-1.72626	0.448501
100247121	4.295	1.13	2.76	10.4	14.66	11.7	5.98333	6.07333	3.76333	7.33333	-1.58334	0.0177325	-1.8257	0.20762	-1.12311	0.0347316	1.56647	0.000174385	0.895163	0.156315
100247150	11.025	7.04	23.9867	46.2067	37.42	8.075	13.0233	13.15	20.4033	18.68	0.266717	0.931035	-0.623639	0.668643	0.874409	0.108056	1.2767	1.16449e-05	0.9687	0.000150489
100247181	0.66	9.41	1.78333	4.15	3.75667	1.71	2.34	0.56	1.59	4.95667	-1.40105	0.669985	2.54266	0.192699	1.70082	0.0597222	1.48473	0.00153345	-0.788325	0.682605
100247219	36.24	84.73	23.4567	9.51	9.33333	18.725	24.93	12.7533	28.3333	52.6767	0.894215	0.740079	2.40439	0.0290407	0.888956	0.0842967	-1.48856	0.000698534	-2.9226	0.00538222
100247245	6.21	2.37667	7.42667	17.28	8.68333	7.665	8.50333	6.13333	8.75667	12.03	-0.432331	0.677212	-1.49026	0.0158284	0.297898	0.79291	1.07927	7.99489e-07	-0.796024	0.561945
100247246	44.655	114.45	177.173	170.813	176.453	166.16	145.35	121.43	66.6567	93.6133	-1.973	0.0274958	-0.0857131	0.973999	0.554943	0.132895	1.44889	7.21154e-07	0.830484	0.173114
100247311	13.69	3.00667	2.71333	2.09333	2.11333	4.18	3.31333	3.08667	5.59333	3.13	1.61593	0.0455079	0.144327	0.960578	-0.170592	0.860148	-1.32502	2.06663e-08	-0.598986	0.192665
100247336	95.595	42.5067	10.44	26.8	17.4733	47.745	44.5633	26.38	18.7333	10.23	0.869891	0.51229	0.228283	0.9111	-1.32098	0.00105463	0.611211	0.00425165	0.581066	0.521147
100247349	25.09	8.89667	6.22	1.27	0.99	5.075	6.75667	3.66333	4.06667	2.75667	2.22237	0.143835	0.950195	0.52956	0.781846	0.00199412	-1.58935	0.000376317	-1.66359	0.00852088
100247368	3.65	8.11667	26.2533	15.5033	19.5167	18.5	10.3367	11.0433	8.19	15.8667	-2.42999	0.00129165	-0.0655602	0.973999	1.28022	0.00143368	1.01418	0.000578174	0.1746	0.891673
100247380	0.03	1.84333	4.45667	18.1733	21.5567	0.625	4.01667	17.2567	25.52	35.8367	-4.12599	0.456821	-0.820134	0.631587	-1.93956	0.00244834	-0.372502	0.751569	-0.541539	0.865788
100247404	2.29	0.756667	1.15667	0.84	0.226667	1.24	1.13	1.39	2.15	1.44333	0.744132	0.688727	-0.0951614	0.973999	-0.267365	0.932126	-1.28374	0.000183856	-2.86756	5.54256e-06
100247419	2.65	2.48333	16.53	20.8933	20.6133	11.43	11.3233	12.9067	11.2433	11.9733	-2.25026	4.5924e-05	-1.9368	0.0364259	0.377946	0.528563	0.987338	0.000184356	0.863336	0.443312
100247421	3.04	1.19667	0.786667	0.47	0.636667	0.815	0.473333	0.183333	0.11	0.226667	1.83652	0.140928	2.00584	0.369732	2.15083	0.130355	2.15954	0.00586201	1.02213	0.687762
100247431	2.62	2.43333	6.79333	5.02	5.00667	2.655	4.11333	3.73667	7.52667	12.4133	-0.164074	0.939342	-0.369842	0.838014	0.870173	0.00298004	-0.488282	0.0574764	-1.28037	0.00350248
100247440	192.83	103.353	52.03	20.43	5.75	55.465	52.9567	20.3633	24.39	26.25	1.78224	0.51688	1.49569	0.101675	1.36971	0.00523203	-0.175385	0.958924	-2.64589	0.0966732
100247446	4.045	4.96667	6.80667	7.56333	6.41333	5.08	4.51667	2.95333	3.20667	5.05	-0.433301	0.879842	0.415658	0.909319	1.21451	0.0854655	1.33544	0.000531276	0.309349	0.725349
100247460	86.245	38.6233	63.83	38.0033	37.8033	47.475	40.7033	29.8433	38.8933	39.2433	0.808455	0.728703	0.24452	0.883888	1.11425	7.70693e-07	0.060669	0.940001	-0.165887	0.899112
100247479	3.41	12.1933	9.45333	7.81333	9.93333	17.795	11.6367	7.37333	5.49667	6.51333	-2.45508	0.00678712	0.317654	0.886869	0.385457	0.602975	0.605029	0.230589	0.40665	0.7252
100247488	19.375	12.8567	5.25	0.896667	0.763333	7.675	2.08333	0.936667	1.99	0.98	1.27209	0.465264	2.81969	0.004181	2.51713	8.74955e-05	-1.06183	0.384916	-0.488939	0.861667
100247495	21.47	5.02667	2.51333	1.11333	0.426667	3.45	2.57333	1.46667	0.89	1.13667	2.50285	0.000926149	1.49282	0.257404	0.798728	0.282134	0.404604	0.66911	-1.76846	0.265894
100247519	74.11	41.55	35.69	32.6433	34.99	56.185	57.8067	59.6733	84.5233	45.5167	0.284466	0.82876	-0.125929	0.960578	-0.725179	0.0785214	-1.27767	1.38319e-12	-0.280088	0.871717
100247526	0.675	1.5	3.25333	1.60667	2.41	0.52	1.38	2.05333	2.51667	7.72333	0.209359	0.966271	0.790087	0.863475	0.656118	0.695316	-0.548763	0.410382	-1.63841	0.00712603
100247528	99.66	23.46	24.2767	12.2633	8.98333	23.985	25.35	11.39	11.94	20.9367	1.99415	0.48216	0.323386	0.924825	1.11067	0.000756664	0.121597	0.940001	-1.43112	0.254989
100247549	43.38	46.0767	36.61	77.9933	52.4333	72.445	73.8533	74.7333	55.3367	62.57	-0.973853	0.688296	-0.153012	0.972564	-1.0086	6.5973e-12	0.591342	2.63008e-05	-0.387042	0.573459
100247554	15.985	12.7733	15.44	12.9567	17.1533	16.165	16.2367	14.6967	32.4267	24.2233	-0.1429	0.95654	0.119708	0.973999	0.100044	0.970121	-1.21395	0.000357663	-0.569877	0.274171
100247557	0.94	0.323333	0.153333	0.136667	0.0533333	0.39	0.25	0.223333	0.28	0.33	1.19376	0.668708	0.905668	0.699815	-0.533646	0.876409	-0.941628	0.404892	-2.84021	0.00920111
100247559	0.085	14.7733	18.4967	10.0633	6.24667	9.2	12.1533	10.75	6.00333	9.01	-7.25408	4.41573e-08	0.691483	0.502942	0.809617	0.000440416	0.842338	0.103066	-0.932672	0.583435
100247563	0.35	1.29	0.206667	0.0766667	0	5.11	0.58	0.0733333	0.0266667	0.0566667	-3.99741	0.00069117	1.49763	0.107551	1.55615	0.791536	1.47564	0.813373	-3.26804	0.72062
100247658	7.335	13.6	10.62	6.1	4.01	7.265	5.23333	4.24	5.92333	5.67	-0.106972	0.964466	1.98785	0.0825096	1.33922	0.00501425	0.134857	0.89694	-0.854523	0.586508
100247670	0.83	0.546667	2.54333	2.30667	2.30333	0.915	1.74	1.64	7.54333	4.47333	-0.252876	0.946345	-1.40816	0.187134	0.640415	0.576072	-1.62421	0.00238784	-0.825732	0.715341
100247673	35.86	99.5967	45.8833	20.6967	25.01	35.16	62.4233	70.43	90.1133	14.8333	-0.197922	0.946345	0.947436	0.500146	-0.582955	0.887591	-2.02116	3.91559e-29	0.905573	0.58635
100247675	22.675	238.807	368.517	161.45	191.22	367.835	224.067	281.127	65.8533	78.0267	-4.08638	3.98388e-06	0.346877	0.83983	0.422449	0.421123	1.39165	3.21297e-10	1.30194	0.00772543
100247690	31.985	17.0633	12.8033	10.6967	7.47	26.87	8.91333	6.97	6.54667	7.03	0.17769	0.946345	1.34857	0.00918899	0.89361	0.267496	0.80036	0.0482256	-0.323433	0.913615
100247693	45.325	3.26	2.26333	0.593333	0.553333	7.67	3.63	2.14333	1.06333	0.05	2.44236	0.000705077	0.216764	0.960578	0.121074	0.982589	-0.733024	0.751306	3.28671	0.335007
100247714	40.435	5.02	2.78	2.65333	0.28	5.87	2.39333	1.11333	0.08	0.796667	2.82441	0.221864	1.26085	0.550692	1.55999	0.392337	5.5378	0.00575646	-2.4802	0.415901
100247733	16.04	8.85333	6.10667	9.69667	20.2133	8.635	5.86667	7.32	3.34	3.66667	0.730047	0.706765	1.05477	0.348035	-0.248769	0.952827	1.63262	5.2466e-05	2.47323	1.96924e-07
100247747	42.815	27.8233	5.31667	1.3	0.623333	17.605	4.65333	0.166667	0.2	0.5	1.222	0.47063	2.99447	0.0211277	5.02658	4.37087e-05	2.81657	0.0926576	-0.153236	0.969575
100247757	0.145	0.113333	0.2	4.36	10.03	0.4	0.446667	0.503333	0.666667	2.42	-1.62893	0.63583	-1.70676	0.419635	-1.31471	0.49293	2.79429	0.000332447	2.03683	3.10594e-07
100247765	6.905	1.57	5.43333	4.40667	0.8	0.415	2.35	4.3	2.06	2.99667	3.93867	0.000169375	-0.0657656	0.97676	0.387287	0.945279	1.1682	0.707071	-2.32097	0.086171
100247770	323.085	32.8167	17.8767	12.73	18.43	45.55	28.0833	21.45	13.52	11.1333	2.69761	1.89656e-10	0.66267	0.59152	-0.237581	0.91257	0.0103334	0.987267	0.527681	0.661429
100247789	190.245	26.99	12.9267	22.8133	5.03667	22.595	28.51	11.4033	8.98	38.18	2.974	0.0699409	0.551355	0.885278	0.209011	0.930569	1.42522	0.557601	-3.19845	0.000831904
100247795	2.48	10.27	8.40333	4.22333	7.86667	3.555	9.76333	7.08667	17.9433	26.6633	-0.612738	0.888965	0.383572	0.794401	0.245658	0.93691	-1.9975	9.67698e-08	-1.64161	0.0752
100247802	10.735	3.46	2.63333	1.23667	1.42667	3.08	2.84	1.99333	3.06667	1.25667	1.69214	0.0131435	0.579327	0.636978	0.424729	0.759639	-1.21194	0.00894269	0.171324	0.904476
100247822	2.43	4.56	1.37333	0.406667	1.23667	68.685	7.99	1.98667	0.316667	0.79	-5.03464	1.25539e-06	-0.288567	0.960578	-0.506213	0.942393	0.457847	0.917675	0.0886127	0.989009
100247833	10.6	1.92667	1.23333	2.93333	1.81333	6.62	3.53667	1.72	1.47	1.84667	0.558673	0.787338	-0.434975	0.801131	-0.461892	0.557563	1.09306	0.00289692	-0.208574	0.897546
100247834	1.105	1.91667	0.536667	0.626667	0.87	3.87	0.936667	0.303333	0.133333	0.303333	-2.00353	0.536156	1.55545	0.382102	0.836214	0.717494	2.32752	0.00759998	1.26023	0.37584
100247840	0.33	0.483333	2.62667	16.7933	12.1333	0.025	0.313333	1.03	3.07667	7.96	3.68258	0.547361	1.4423	0.876901	1.37078	0.419217	2.55109	8.96655e-06	0.722532	0.661429
100247858	98.055	72.0433	61.02	9.09	5.91	13.69	35.8633	17.9367	28.53	9.22333	2.80712	0.0460039	1.37162	0.0290407	1.77885	0.000190453	-1.56108	0.332581	-0.647395	0.66018
100247907	0.64	1.02333	1.22333	2.32	5.38	0.09	1.23333	1.38667	9.45333	12.8733	2.56992	0.526243	0.245647	0.960578	-0.191636	0.970121	-1.93683	0.00022872	-1.26263	0.000129821
100247908	5.43	2.95	2.41	5.34333	4.44	9.06	3.56	3.99667	0.976667	3.14	-0.858164	0.333877	0.370632	0.947236	-0.711384	0.0630803	2.55453	2.06732e-12	0.266533	0.892381
100247918	24.365	101.797	149.647	108.007	81.4633	126.9	86.1667	142.763	76.2767	50.2167	-2.49848	2.36703e-06	0.70597	0.536214	0.104056	0.970121	0.600413	0.00723337	0.485659	0.642563
100247951	3.77	0.346667	0.633333	0.14	0	0.17	0.46	0.02	0.0933333	0.33	4.33266	0.00852557	-0.131398	0.973999	5.0198	0.0695194	0.627016	0.940001	-4.98607	0.0886241
100247965	66.625	8.97333	17.24	3.03667	3.82	10.515	6.47667	1.81333	9.13333	5.72	2.49309	0.0432431	0.669531	0.798	3.27212	1.06828e-16	-1.47352	0.0234313	-0.522711	0.719706
100247971	0.43	0.78	0.616667	0.823333	0.46	0.67	0.76	0.87	0.8	1.39	-0.757705	0.823577	0.655266	0.842454	-0.497351	0.680984	0.146279	0.920413	-1.6963	0.00104492
100247990	0.045	0	0	17.5067	2.02	0	0.0633333	1.65667	0.216667	0.126667	1.25554	0.946345	-1.31902	0.960578	-6.56214	0.00129218	6.38124	0.317069	4.16276	0.294607
100247995	5.735	0.203333	0.153333	0.16	0.0266667	0.115	0.39	0.316667	0.236667	0.176667	5.50618	1.5031e-14	-0.554429	0.82449	-1.03843	0.647134	-0.475208	0.834872	-2.85483	0.252623
100248010	19.325	73.9667	129.307	188.173	209.703	73.48	127.433	155.177	139.993	243.037	-2.09272	0.00559745	-0.459498	0.702461	-0.242061	0.38121	0.522757	0.0827338	-0.121321	0.935836
100248011	97.165	25.98	38.3333	8.03667	4.22	92.17	91.5867	54.9867	50.2267	38.19	-0.200333	0.969543	-1.41009	0.194369	-0.490492	0.61293	-2.53927	4.64486e-21	-3.42223	1.54165e-06
100248013	20.615	7.10333	13.0933	12.3867	11.1867	19.585	12.65	8.92	5.97	4.64	-0.0354988	0.991202	-0.572501	0.733673	0.573164	0.282134	1.14654	2.89536e-06	1.04787	0.194706
100248101	1.695	22.0933	50.58	190.74	197.15	38.95	61.32	137.86	209.87	135.423	-4.64488	0.00115346	-1.12501	0.276573	-1.41329	0.000248779	-0.0375655	0.947212	0.582138	0.439035
100248102	36.44	4.8	0.5	3.39	2.59333	4.235	1.50667	0.503333	0.67	2.88	3.11484	0.181447	2.3768	0.262161	0.0445035	0.999362	2.42147	9.67281e-05	-0.0265381	0.994757
100248113	0	0	0.0266667	2.46333	5.70333	0	0.0533333	1.73667	4.13333	10.07			-1.34883	0.960578	-5.82933	0.0011474	-0.635105	0.598431	-0.657477	0.827547
100248114	10.02	1.25	3.69667	11.5633	7.96333	9.895	4.74333	4.10333	4.23667	5.27333	-0.0697436	0.98829	-1.54215	0.00597013	-0.129121	0.970121	1.54235	1.84633e-08	0.407559	0.716485
100248134	2.77	4.64	5.99	19.8667	16.4033	10.705	8.92333	7.04	5.42667	13.9567	-2.16107	0.0733856	-0.435702	0.819087	-0.211782	0.945611	1.9627	5.2432e-16	0.0181274	0.994757
100248187	7.79	4.61667	2.93	5.08667	6.24333	4.595	3.18333	3.46667	2.35	5.21333	0.61965	0.698061	0.926437	0.405549	-0.223835	0.93416	1.2101	3.14857e-05	0.170456	0.85952
100248194	1.485	0.66	0.876667	1.04	0.546667	1.395	1.24333	0.693333	0.45	0.4	-0.0273156	0.993854	-0.706022	0.733078	0.34635	0.72755	1.31368	0.000268838	0.380165	0.684731
100248235	29.77	10.0467	11.7967	10.73	7.60333	6.955	8.13667	11.5667	15.1833	10.34	1.98052	0.00191123	0.742319	0.358473	0.0408727	0.978883	-0.408368	0.130649	-0.491361	0.306496
100248271	10.05	0.07	0.0833333	0.0733333	0.0966667	0.63	0.163333	0.01	0	0.0466667	3.86852	0.0047354	-0.903582	0.921088	2.73652	0.659831	3.59872	0.595363	0.972209	0.821972
100248302	48.51	16.8	22.91	15.8233	16.2	11.695	12.6667	11.12	25.2067	21.84	1.98758	0.0597064	0.723438	0.329939	1.06147	9.09487e-05	-0.57332	0.039016	-0.428614	0.480164
100248303	7.285	11.7767	14.41	21.11	24.28	19.64	21.5833	19.3467	14.23	18.5667	-1.52219	0.00737797	-0.478968	0.490821	-0.393771	0.370985	0.671725	0.0183468	0.30835	0.598032
100248315	1.31	0	0	0.0166667	0	0.02	0.0233333	0	0.00666667	0	6.62966	0.00818204	-1.90306	0.952218			1.05299	0.940001
100248328	35.57	20.04	13.5033	17.94	4.33333	8.42	9.10667	7.78333	8.11	6.86667	1.93619	0.00441516	1.46353	0.0561869	0.796158	0.568376	1.25336	0.019838	-0.516768	0.862394
100248343	8.645	6.77	11.5167	15.2567	13.11	17.8	14.98	14.3933	12.13	14.47	-1.18216	0.00699449	-0.798877	0.0256404	-0.303965	0.161288	0.425667	0.00501717	-0.16046	0.815655
100248406	0.3	14.4667	31.1833	26.4167	13.1933	11.96	21.0433	21.87	13.3867	19.6267	-5.4343	6.30575e-07	-0.175073	0.960578	0.536719	0.600243	1.0788	0.0464112	-0.583564	0.533673
100248423	11.32	1.11	1.99	1.89667	2.00333	1.335	1.45667	1.58333	2.04	1.28333	2.92485	3.76057e-05	0.0150531	0.9918	0.347906	0.856068	-0.0102371	0.989935	0.63948	0.497039
100248430	16.82	14.0233	6.52	7.52667	0.906667	6.775	6.54333	8.66333	5.34667	3.85	1.11033	0.438976	1.56247	0.0985906	-0.403687	0.7529	0.590022	0.46741	-2.02624	0.00743792
100248440	219.68	806.737	910.83	376.317	221.897	655.135	705.93	408.973	345.567	161.353	-1.67178	0.217582	0.44273	0.828195	1.17573	8.61603e-08	0.222867	0.510177	0.496912	0.457915
100248459	6.735	3.56	2.77667	3.35667	2.45	5.7	3.87	2.51667	1.29	1.50667	0.100441	0.946345	0.1911	0.921088	0.156723	0.970121	1.47417	5.91641e-08	0.620299	0.398397
100248471	1.165	8.54667	8.34	19.98	13.9267	8.41	8.54333	15.1567	14.8433	27.3533	-2.93953	0.119006	0.631162	0.82258	-0.849659	0.00050971	0.523354	0.0166384	-1.01463	1.08177e-05
100248474	0.32	4.75	21.3767	20.9067	17.9267	6.585	9.13667	17.37	21.9933	14.36	-4.48358	7.11149e-09	-0.553859	0.432899	0.320013	0.8678	-0.0107993	0.990782	0.315133	0.771968
100248484	3.91	0.03	0	0.03	0	0.04	0.04	0.0266667	0	0	6.44175	0.000117046	-0.214425	0.978318	-1.8231	0.970121	1.99469	0.880413
100248493	63.725	27.17	36.2733	44.3167	42.78	40.82	34.9233	37.21	30.97	20.9733	0.484061	0.57829	-0.092253	0.973999	-0.0149132	0.996012	0.617768	0.00746827	1.03228	0.00167053
100248494	20.455	2.62333	0.913333	0.313333	0.12	4.02	2.58	0.816667	0.893333	1.27333	2.28665	0.259221	0.381167	0.915385	0.168147	0.970121	-1.42273	0.148258	-3.77746	0.0053188
100248535	22.22	47.98	46.18	15.28	10.4367	35.98	29.6167	24.7	13.46	7.92333	-0.813349	0.32701	1.05612	0.00062018	0.930894	0.00050971	0.285888	0.780057	0.287926	0.754474
100248537	7.725	6.41667	6.55667	18.68	54.8867	8.12	5.88333	2.46667	1.73333	11.5033	-0.192961	0.946345	0.330221	0.951666	1.42701	0.18577	3.53029	1.05141e-12	2.20316	4.28096e-15
100248590	284.21	2193.41	2663.26	2455.32	2451.76	1528.63	2568.99	3138.23	2488	1385.78	-2.61392	0.00996994	0.101386	0.960578	-0.200282	0.708598	0.08774	0.885702	0.684533	0.262912
100248608	73.05	401.47	525.533	592.21	674.86	308.07	343.487	358.69	391.527	755.17	-2.19284	5.9679e-07	0.78837	0.650076	0.56509	0.0696146	0.694845	8.51968e-05	-0.406184	0.763556
100248614	3.665	3.44667	2.59667	6.71333	8.37	3.095	4.49333	2.22	3.53667	2.52667	0.0660445	0.98924	0.0838762	0.973999	0.225454	0.970121	1.01699	0.00385051	1.78538	0.0271417
100248622	8.56	0.06	0.0566667	0.06	0	0.48	0.06	0	0	0	4.08582	0.00456997	0.377178	0.973999	1.82613	0.970121	1.99469	0.880413
100248643	0.93	0.236667	0.2	0.56	0.216667	0.4	0.18	0.0366667	0.0266667	0.0466667	1.07318	0.469782	0.810893	0.852065	2.348	0.253102	4.39415	2.12341e-05	2.22275	0.165078
100248645	594.785	488.04	566.413	489.05	537.49	727.48	636.227	668.007	541.333	272.597	-0.433345	0.687185	-0.097237	0.973999	-0.204793	0.580203	-0.0399836	0.940001	1.00541	0.00572591
100248651	2.225	1.21667	0.33	1.45	0.316667	0.11	0.0966667	0.0733333	0.0966667	0.116667	4.25339	0.0169653	4.31691	0.00569548	2.18843	0.132846	3.95266	0.0318765	0.935196	0.859397
100248679	0.015	0.0366667	0.0366667	1.42	3.42667	0.34	0.33	0.773333	0.766667	0.263333	-4.41937	0.314587	-2.70482	0.379045	-4.43026	0.0038581	0.982865	0.23506	3.22424	0.0476477
100248682	36.045	14.1567	3.71667	1.44	1.03667	6.865	6.72667	2.11667	1.24	2.38667	2.26272	3.30904e-06	1.69333	0.197303	0.816231	0.341815	0.309224	0.78118	-1.56846	0.355919
100248709	41.765	20.2067	20.13	5.85	1.68	20.18	11.0233	7.90333	5.91667	6.82667	0.930001	0.344395	1.46458	0.247913	1.37479	1.36566e-05	0.0841076	0.940001	-2.51952	0.0814799
100248717	76.67	31.5167	22.6567	12.7867	20.3933	17.975	19.0933	12.8267	19.8733	23.2867	2.01185	0.00958222	1.02912	0.0689162	0.828282	0.0175455	-0.552768	0.544324	-0.317633	0.62376
100248724	0.29	0.186667	0.08	0.22	0.113333	0.075	0.21	0.49	1.78667	1.17	1.79735	0.810628	0.43009	0.961086	-2.62602	0.0233404	-2.95001	0.000177077	-3.98907	0.0878928
100248744	190.575	190.613	245.043	416.037	497.017	451.245	296.003	310.043	334.5	376.007	-1.37646	0.00237773	-0.192512	0.937641	-0.318347	0.0307209	0.411671	0.00192052	0.197637	0.893527
100248766	2.4	9.23	13.92	8.24	5.69	7.31	7.89667	10.7167	14.7967	14.2067	-1.6883	0.165205	0.765458	0.641293	0.396026	0.510048	-0.746009	0.0142061	-1.47259	0.00246691
100248812	3.165	0.95	0.226667	0.243333	0.0133333	0.73	0.803333	0.0366667	0.666667	3.61	2.02665	0.56995	0.765475	0.792147	2.57492	0.489955	-1.3675	0.471556	-8.24113	3.55504e-07
100248834	59.39	7.17	6.14667	6.25667	8.04667	41.31	9.38667	4.41	1.55667	2.18333	0.54953	0.937919	0.00764279	0.997101	0.501279	0.712294	2.09055	0.00213395	1.30233	0.645
100248876	15.99	7.09667	6.23	5.53333	2.85333	8.86	15.4667	5.78667	8.72667	13.1267	0.791662	0.803571	-0.783738	0.56815	0.122876	0.970121	-0.563237	0.340265	-2.25853	0.00374525
100248895	9.945	5.05667	0.863333	0.566667	0.603333	3.5	0.86	0.32	1.32333	1.58	1.27181	0.614629	2.8619	0.00486337	1.48403	0.507766	-1.11892	0.435369	-1.21197	0.687214
100248951	4.66	5.04667	7.92333	3.76	2.43	2.325	4.83	6.42	6.16	6.94667	0.846829	0.772054	0.68446	0.797796	0.299077	0.928468	-0.604928	0.499894	-1.68156	0.00473948
100248971	7.975	13.5233	3.76	0.496667	0.123333	3.485	1.38	0.686667	2.11667	0.87	1.09337	0.254797	3.57241	1.96686e-07	2.46486	0.0306336	-1.99898	0.000120477	-2.99868	0.000447971
100249006	26.93	8.56667	4.76	1.26667	0.68	7.07	2.55	0.963333	0.48	0.766667	1.85696	0.262995	1.98214	0.0905204	2.31438	0.0024099	1.50737	0.101118	-0.280987	0.917583
100249014	188.595	51.0467	45.1133	129.47	138.64	60.145	87.9433	156.9	168.837	137.637	1.48532	0.00789355	-0.29718	0.930432	-1.78206	4.71158e-07	-0.286713	0.482886	0.0643775	0.9502
100249018	8.665	0.33	0.103333	0.0233333	0	0.145	0.366667	0.00666667	0.0466667	0	5.65782	3.96648e-06	0.116565	0.973999	3.61737	0.301609	-0.863332	0.882424
100249066	24.02	3.27333	2.72333	2.32667	2.60333	8.54	5.14333	2.58333	1.42667	0.476667	1.35428	0.0190899	-0.391251	0.910278	0.0933767	0.989397	0.800093	0.254905	2.37545	0.000712285
100249097	199.52	77.9233	60.24	44.68	39.7767	72.505	61.5933	68.7333	79.3333	42.0733	1.31329	0.00678998	0.621671	0.453569	-0.171877	0.730449	-0.732265	5.40321e-07	0.0229589	0.993766
100249110	8.175	8.09	17.51	7.88	2.95333	1.92	6.59667	5.74667	15.9467	10.4333	2.02573	0.0185509	0.718552	0.61291	1.65278	0.0239729	-0.681465	0.348759	-1.60403	1.14922e-05
100249149	4.105	9.06667	7.78667	4.25333	3.41667	7.115	8.55667	8.44667	9.92	13.32	-0.936981	0.332734	0.657593	0.749797	-0.108995	0.970121	-1.12322	4.23415e-06	-2.11915	5.0618e-07
100249153	94.04	365.623	22.7567	14.7167	9.77667	53.12	28.61	49.2	54.45	28.6967	0.724408	0.643689	4.39789	0.000967781	-1.09342	4.99766e-06	-1.79255	1.7168e-05	-1.66867	0.00396896
100249156	9.89	1.07333	1.14333	3.92333	6.46667	6.35	4.18667	2.89	2.14	2.19667	0.510313	0.833419	-1.61495	0.0462088	-1.32789	0.113979	0.970475	0.0315264	1.57954	0.000789323
100249192	9.74	9.38667	15.93	7.26	4.17	8.69	11.9133	7.41667	10.75	3.83667	0.036421	0.988592	-0.114093	0.973999	1.12632	0.00182849	-0.462255	0.503229	0.00758767	0.994757
100249220	0.16	0.37	0.313333	0.66	0.18	0.9	0.12	0.02	0.05	0.03	-2.65836	0.103113	1.83868	0.504577	4.02174	0.109884	3.8816	0.00735343	2.52589	0.353939
100249226	22.02	6.16333	5.49667	3.10667	2.17333	3.405	5.82	5.98	7.67667	6.02667	2.57792	2.09866e-05	0.533769	0.699955	-0.111253	0.970121	-1.21699	0.00805531	-1.5331	6.22555e-07
100249232	15.315	29.55	72.5167	131.93	172.427	60.05	65.2733	95	123.2	151.54	-2.11134	8.24344e-09	-0.822496	0.0382981	-0.371912	0.117074	0.195413	0.567673	0.189042	0.827384
100249245	17.1	4.48667	7.64	1.62667	1.36667	3.045	5.83667	5.76667	6.54667	4.8	2.31948	0.0881303	0.0347811	0.98165	0.392646	0.854889	-1.89755	0.00611124	-1.92062	9.45669e-06
100249254	1.1	11.0333	22.6833	64.0667	62.01	16.86	29.3533	38.9367	33.5667	19.0167	-4.14146	1.35576e-06	-1.17679	0.233311	-0.757636	0.0338356	1.03525	0.000320057	1.68377	2.6785e-05
100249255	149.725	80.0267	29.19	126.57	91.4667	79.8	177.743	167.077	159.14	115.173	0.634672	0.900744	-0.825983	0.62489	-2.49747	0.00244834	-0.231774	0.569861	-0.218194	0.915138
100249279	284.555	268.427	137.53	72.2367	80.03	185.15	106.52	56.71	82.7367	134.143	0.52829	0.701716	1.86716	0.0561869	1.30183	1.09057e-05	-0.10265	0.889831	-0.988619	0.282973
100249283	367.43	176.243	179.047	83.9933	62.8533	232.925	166.47	176.763	181.527	84.1433	0.501872	0.425249	0.363412	0.824426	0.0449593	0.970121	-1.0096	4.97789e-08	-0.335478	0.803508
100249284	2.325	2.07333	1.59333	0.82	0.89	2.795	2.60333	0.943333	0.406667	0.153333	-0.409791	0.905052	0.0291984	0.979183	0.772866	0.357325	1.12079	0.116139	2.47	0.004364
100249300	101.015	135.937	53.47	23.93	30.5233	32.21	64.11	44.5467	62.6633	47.3533	1.52022	9.13855e-05	1.55087	0.00904492	0.27992	0.892348	-1.29834	6.17884e-05	-0.8363	0.258809
100249312	0	0.536667	0.91	2.4	3.65667	0.455	0.956667	1.33333	1.65667	2.03667	-7.81758	0.00152366	-0.640137	0.799789	-0.534842	0.488459	0.628779	0.0414763	0.877516	0.16399
100249324	15.61	12.1767	4.71333	1.98667	4.35333	3.85	6.38333	0.883333	2.03	2.37667	2.03431	0.459495	1.23866	0.582447	2.45748	0.000162565	0.0464252	0.983999	0.455836	0.884164
100249331	4.595	8.94667	3.18333	0.343333	0.293333	2.825	5.75333	2.08333	3.52	2.09	0.505126	0.923736	1.00271	0.131639	0.6355	0.76441	-3.26362	0.000176902	-3.29529	0.157039
100249342	1.155	0.686667	3.08667	1.82667	3.11667	0.44	6.57	6.02333	12.1033	17.3067	1.16286	0.830373	-2.77877	0.0130364	-0.985616	0.636912	-2.62961	1.3314e-05	-2.34217	0.0510606
100249385	45.21	15.04	20.2933	29.7733	23.74	82.27	61.71	30.7867	34.09	46.8067	-1.03809	0.331584	-1.66117	0.00110587	-0.587251	0.0692829	-0.0989855	0.74292	-1.01431	0.0291253
100249393	5.085	1.32	1.24	12.6333	13.7767	2.545	4.12	3.24333	6.43	13.7233	0.836466	0.41087	-1.26023	0.0107393	-1.38224	0.00550813	1.07072	0.00490237	-0.012588	0.989027
100249395	8.73	4.29	5.68333	12.79	10.4967	13.725	8.11	7.15667	6.31333	7.05	-0.768071	0.386115	-0.545417	0.705386	-0.313848	0.895336	1.11414	1.38716e-06	0.394906	0.730229
100249419	61.355	17.8633	12.8367	7.23	4.35	13.455	11.4567	6.05333	7.97667	5.54333	2.02789	0.0048065	1.07064	0.261088	1.09591	0.0521787	-0.0433069	0.966511	-0.397517	0.802733
100249436	2.68	17.3533	39.1833	38.5533	30.0067	15.765	25	27.38	31.3333	42.02	-2.69794	0.00435921	-0.181143	0.960578	0.53772	0.112973	0.405507	0.531247	-0.400823	0.800896
100249456	5.73	8.45667	22.95	12.78	13.0033	9.085	11.43	10.7533	23.3367	15.0133	-0.797016	0.228275	-0.158613	0.960578	1.10538	0.00143368	-0.770687	0.000959352	-0.221488	0.793791
100249474	102.125	45.2333	9.70333	5.79	2.15	40.475	17.4733	6.89	3.37333	10.42	1.20899	0.00233079	1.86647	0.00604429	0.508971	0.136804	0.858956	0.415574	-2.85556	0.136643
100249486	0.94	0.996667	1.09333	3.17667	3.76333	1.875	1.84	1.47	1.65667	3.18	-1.14337	0.325028	-0.470725	0.723711	-0.414553	0.601255	1.03021	0.0011258	-0.0107873	0.994757
100249518	7.31	8.63	2.41667	0.33	0.103333	3.28	4.23333	2.25333	2.72667	2.56333	0.90349	0.871437	1.41695	0.0491685	0.111972	0.970121	-2.95496	4.88703e-13	-4.86529	2.18688e-09
100249526	2.4	62.58	42.73	34.9433	41.1467	36.865	58.1733	37.8967	24.2367	41.3967	-4.19944	0.00782362	0.635216	0.699814	0.239036	0.970121	0.629533	0.770841	-0.601244	0.880123
100249533	1097.9	800.01	40.61	6.55667	1.14	283.315	129.17	124.71	45.1333	21.2167	1.88291	0.155667	3.17391	0.00441286	-1.60653	1.24224e-08	-2.68353	6.60876e-05	-4.15066	0.00255835
100249539	7.1	1.45333	2.22	9.37667	10.1533	5.17	5.20667	5.04	5.25333	9.99667	0.292512	0.917698	-1.49211	0.00150264	-1.18557	0.00307051	0.947112	0.0031498	0.00154204	0.99775
100249570	9.71	17.88	40.6567	42.6633	40.4133	36.01	29.1067	26.4067	22.3967	22.5967	-1.97921	0.00371202	-0.296573	0.798	0.651142	0.141335	1.02535	8.12963e-08	0.530908	0.737368
100249578	25.86	1.87667	0.446667	0.06	0.07	0.495	0.773333	0.146667	0.216667	0.32	5.63542	3.21126e-12	1.81482	0.246596	1.63913	0.373376	-1.79573	0.538231	-2.64158	0.519212
100249622	22.125	22.1867	19.4467	17.3533	15.59	40.515	34.7667	19.1167	9.21333	11.4867	-0.947686	0.436064	-0.323552	0.926507	0.0619061	0.974996	1.0064	0.00065907	0.0301805	0.994757
100249659	1.405	1.70333	2.77	8.93333	12.4	3.37	2.84333	2.76333	4.58667	7.86667	-1.393	0.029312	-0.47661	0.7458	0.0194936	0.994504	1.05806	1.5429e-06	0.693145	0.275211
100249672	19.09	8.20667	10.2	13.27	9.48667	7.3	9.25333	3.93333	3.92	4.09333	1.35384	0.469105	0.249345	0.878506	1.38326	0.000389204	1.85551	3.26243e-19	1.19951	0.0288838
100249719	7.505	0.796667	0.86	0.256667	0.06	1.035	0.633333	0.273333	0.476667	0.126667	2.73457	0.000797327	0.659858	0.789508	1.76568	0.149466	-0.818984	0.662276	-1.31319	0.70245
100249741	5.115	13.8167	7.76333	23.05	23.15	13.045	14.5567	13.3167	17.7367	40.7933	-1.501	0.00265088	0.601847	0.868053	-0.773273	0.00606063	0.472393	0.0801997	-1.13127	0.296796
100249746	19.355	3.82	1.78	3.90333	2.63667	5.94	2.24	2.06667	2.56667	2.88667	1.60733	0.000191058	1.09269	0.446834	-0.21146	0.970121	0.722885	0.0258842	-0.00179984	0.998848
100249751	0.05	0	0.0166667	0.0166667	0.116667	0	0.0333333	0.146667	1.60667	2.71	2.29445	0.931035	-1.31902	0.960578	-3.02922	0.548022	-6.37951	7.48922e-05	-4.35284	0.0064196
100249779	8.485	13.0533	49.51	14.7233	22.8633	9.54	17.3233	22.44	21.9633	16.64	-0.269247	0.946345	-0.182305	0.960578	1.17571	0.000209451	-0.482876	0.0184242	0.493363	0.459863
100249814	0.08	3.60667	8.71667	5.96667	6.46333	1.6	3.95667	4.52	4.77	4.45333	-4.43128	0.00539752	0.197126	0.960578	0.953484	0.530197	0.426837	0.594973	0.631477	0.644538
100249816	38.965	1049.89	1196.63	1026.05	939.747	406.32	896.05	1135.17	711.62	779.67	-3.62485	0.000859159	0.727068	0.59844	0.104031	0.970121	0.626038	0.00142899	0.0768402	0.944973
100249831	53.61	21.8333	15.7167	7.89	2.90667	19.045	27.26	13.5833	16.7533	10.9733	1.36307	0.000297997	0.0239041	0.973999	0.21775	0.866768	-0.988737	0.031305	-2.00875	0.00371798
100249839	1.57	0.28	0.156667	5.16333	0.0866667	0.745	0.14	1.72	0	0.42	0.770919	0.931035	1.84141	0.68863	-3.40263	0.000269605	9.44038	0.0996901	-2.66572	0.52082
100249919	4.005	12.9767	13.12	5.42667	2.1	7.965	7.48333	2.67333	1.78667	2.92667	-1.10156	0.384004	1.07427	0.601081	2.3314	1.09628e-06	1.69994	0.00550887	-0.436296	0.793168
100249937	1.715	4.24333	0.816667	0.983333	0.91	0.925	1.43333	1.78	1.65667	0.61	0.705271	0.823888	1.85642	0.00444733	-1.11617	0.501114	-0.663314	0.41539	0.453906	0.710625
100249984	31.55	75.9667	78.0767	52.03	53.5633	43.38	36.0133	41.2933	28.1333	43.8	-0.57824	0.716272	1.62664	0.113452	0.925599	0.0394349	1.00647	0.00720685	-0.206807	0.935836
100249988	6.425	8.17333	12.37	8.62	8.36	11.805	9.06	5.94	5.75667	11.2467	-0.987167	0.205494	0.380102	0.902023	1.06658	0.00231705	0.674891	0.0586321	-0.659294	0.555141
100250001	0.17	2.09333	4.36	15.13	8.29667	1.07	6.61333	6.58333	3.81	8.4	-2.88375	0.262376	-1.44957	0.397228	-0.598469	0.657478	2.09601	0.000914454	0.131678	0.960259
100250058	62.105	141.75	246.19	300.34	478.827	243.795	179.46	207.29	282.89	449.837	-2.0947	5.79244e-05	0.0344325	0.973999	0.282898	0.693674	0.184712	0.425825	-0.019723	0.983679
100250062	3.045	2.16333	1.55667	0.91	0.463333	0.97	1.41	1.67667	2.28667	1.77667	1.4338	0.632527	1.0588	0.292221	-0.0964647	0.970121	-1.24	0.00381556	-2.17989	0.0180068
100250128	17.51	15.38	14.71	15.64	15.7667	14.19	23.0667	16.65	22.31	39.3067	0.171255	0.940348	-0.1666	0.960578	-0.165758	0.970121	-0.390787	0.0984516	-1.30964	0.000218811
100250200	50.82	45.82	61.73	132.517	78.2833	182.43	103.097	125.52	53.0133	48.01	-2.0148	0.00042957	-0.856296	0.0971232	-0.98198	0.09971	1.42171	5.62854e-05	0.502492	0.688946
100250216	9.25	31.1333	64	196.07	25.16	3.045	6.03333	26.77	22.5633	12.0367	1.64045	0.735464	2.79233	0.0555806	1.28103	0.817621	3.21578	2.67098e-05	0.563376	0.884766
100250236	10.325	1.13333	0.373333	0.0766667	0.04	0.845	1.27333	0.31	0.203333	0.33	3.52154	1.36323e-06	0.107577	0.973999	0.339018	0.970121	-1.31904	0.658987	-3.11782	0.0469804
100250244	29.025	21.69	5.33667	0.496667	0.163333	9.725	19.45	8.59	3.62667	0.59	1.46468	0.162053	0.503451	0.572091	-0.679434	0.580221	-2.79322	0.00172724	-1.71817	0.385607
100250300	2.53	14.8933	39.7067	27.63	40.1133	15.175	18.3033	31.56	21.6933	22.6133	-2.78262	0.001544	-0.0280477	0.981353	0.362439	0.657319	0.447225	0.0376162	0.960037	0.467955
100250305	16.755	4.26333	0.43	0.0666667	0.15	0.55	0.316667	0.203333	0.98	0.116667	4.91084	0.000112192	4.52736	0.000998333	1.04622	0.686499	-3.85827	0.0051209	0.728548	0.907922
100250331	6.555	30.0467	23.7233	25.8833	25.6467	23.185	21.8533	18.45	11.14	35.85	-1.92416	0.0777609	0.923143	0.301333	0.386283	0.751517	1.30903	5.12534e-08	-0.919803	0.630735
100250354	29.065	2.90333	2.56333	2.45	0.49	2.045	1.86	0.856667	1.46667	2.42667	3.78863	0.0700527	0.91898	0.443337	1.61051	0.00614441	0.817528	0.6549	-2.43686	0.00591329
100250360	3.835	7.45667	3.84333	2.80667	0.793333	15.35	9.06	5.56	2.78	3.19667	-2.17878	0.00164999	0.0872869	0.973999	-0.532194	0.812986	0.114176	0.925284	-2.26191	0.0266742
100250388	1.805	2.48333	3.18333	7.94333	8.83333	5.48	7.86	7.31	6.98333	12.78	-1.69801	0.113698	-1.35349	0.0675849	-1.19208	0.000757291	0.287311	0.5686	-0.40248	0.856258
100250396	0	2.20333	0.136667	0.0466667	0.0233333	0.07	0.11	0.113333	0.07	0.663333	-2.59653	0.921117	5.00174	0.0063383	0.272602	0.98755	-0.430602	0.947212	-5.2101	0.0865095
100250410	32.905	4.01333	4.17667	2.86333	3.34667	6.285	5.07667	3.61667	3.16333	2.35	2.2547	0.00412964	-0.0901551	0.973999	0.207279	0.970121	-0.0464487	0.970796	0.562387	0.699704
100250437	8.285	0.24	0.176667	0.03	0.286667	0.655	0.266667	0.976667	0.62	0.123333	3.57228	0.0908489	0.459326	0.960578	-2.43985	0.0998881	-4.35019	0.00746413	1.09201	0.648944
100250457	21.91	11.36	9.37333	5.43667	7.62	8.59	8.67667	9.37	10.1667	7.17333	1.21934	0.00420216	0.783478	0.13203	0.0223045	0.987944	-0.80918	5.464e-06	0.0311521	0.951929
100250461	10.76	1.89667	5.71667	9.13333	2.96333	3.835	3.31667	2.31333	0.49	4.61	1.39275	0.54098	-0.538809	0.918546	1.2807	0.289622	4.33224	3.78227e-09	-0.645307	0.816289
100250497	10.21	18.3867	38.9333	57.6133	46.1967	35.705	28.7967	41.0233	34.2267	34.3267	-1.9615	7.73883e-05	-0.225798	0.880659	-0.0447586	0.970714	0.845659	2.18666e-09	0.21124	0.890817
100250504	51.725	61.93	171.957	68.3633	85.4133	42.08	39.4167	53.4333	45.3533	26.19	0.180758	0.941233	1.13828	0.69066	1.7087	0.1409	0.692796	0.613848	1.64415	8.74482e-05
100250535	21.825	8.01667	41.1967	82.9867	87.5	30.705	39.9033	38.1767	73.6133	83.26	-0.592353	0.381989	-2.0458	0.000209991	0.0998846	0.960175	0.237746	0.124329	0.108822	0.918424
100250543	16.81	6.54	3.16333	0.793333	0.486667	3.225	3.36333	1.22333	2.07333	3.10333	2.1929	0.0341458	1.53563	0.231631	1.37111	0.0122079	-1.27704	0.00823868	-2.70989	3.84808e-08
100250571	0.705	0.15	0.276667	0.513333	0.01	0.235	0.216667	0.126667	0.01	0.0666667	1.514	0.684865	-0.247412	0.973999	1.22021	0.669769	5.53561	0.00523594	-2.94505	0.635999
100250578	48.53	9.76333	6.19667	5.52667	4.16	9.595	8.15	4.73667	5.45	4.33	2.11823	0.00155147	0.544733	0.659405	0.394777	0.592023	0.0102609	0.986771	-0.127285	0.935836
100250612	26.855	12.5267	11.2967	8.34333	2.51667	12.24	12.5767	10.9267	13.0167	7.93	0.994432	0.41726	0.466961	0.79713	0.0462222	0.982589	-0.514212	0.261111	-1.71413	3.86488e-05
100250615	68.375	20.0933	7.34667	5.3	3.16	17.945	25.19	13.3167	11.6667	3.32667	1.76151	0.0020585	0.0433606	0.976418	-0.856319	0.293932	-1.04724	0.110834	-0.166198	0.927157
100250619	2.46	0.213333	0.06	0.03	0.04	0.075	0.106667	0.02	0.02	0.0633333	4.78536	0.000918891	1.42884	0.601081	1.65239	0.856779	0.722925	0.940001	-0.787872	0.899233
100250664	13.985	0.726667	0.7	0.753333	1.63	0.77	1.62333	0.886667	1.81667	1.96	4.12368	0.00602619	-0.793237	0.742718	-0.294204	0.968475	-1.16621	0.134567	-0.285386	0.884383
100250665	2.445	1.59333	1.74333	1.39	0.93	1.625	1.88667	1.85	2.26667	2.52333	0.500139	0.877265	0.116302	0.961086	-0.0733615	0.970121	-0.613975	0.183988	-1.4601	0.00671324
100250666	13.53	41.3133	19.7667	0.703333	0.153333	40.935	36.3933	4.21333	0.633333	0.12	-1.83012	0.323054	0.434004	0.944033	2.25423	0.00491575	0.238899	0.949944	-0.270194	0.963385
100250689	6.33	4.66	6.30667	1.99333	2.47333	3.305	3.24	2.1	3.50667	2.10667	0.775288	0.584848	0.817533	0.339716	1.60458	2.93311e-07	-0.722876	0.133701	0.103814	0.935836
100250698	31.66	15.9767	13.0267	3.66333	3.52	10.93	7.68667	5.57333	6.92	3.61	1.40195	0.208088	1.65834	0.274152	1.24524	0.0020447	-0.820571	0.232965	-0.375772	0.884883
100250741	192.18	228.123	98.53	95.4733	32.2933	199.485	176.043	132.757	37.3633	76.83	-0.11935	0.98039	1.01577	0.607938	-0.398162	0.610249	1.44596	1.01966e-05	-1.83811	0.382998
100250782	96.37	42.7167	103.08	44.87	26.3467	18.85	38.7767	39.4967	57.3133	24.48	2.2891	0.0129961	0.498934	0.5832	1.39645	2.63195e-08	-0.253483	0.43098	-0.130379	0.935836
100250812	38.255	20.52	10.8567	10.48	14.9467	5.175	18.1133	9.65667	26.67	33.8733	2.79021	6.26196e-05	0.664525	0.668297	0.17007	0.963393	-1.25466	0.00330728	-1.2811	0.0178168
100250814	0.5	0.373333	0.726667	2.83	1.10333	1.06	0.396667	1.48	5.31667	7.95333	-1.21225	0.57826	0.11875	0.973999	-1.00471	0.287096	-0.817877	0.0842754	-2.7805	3.17102e-05
100250828	0.72	0.163333	0.19	0.143333	0.0833333	0.4	0.256667	0.3	0.87	3.67333	0.717132	0.880069	-0.341982	0.960578	-0.652864	0.946163	-2.48933	0.0136256	-5.25087	0.00227365
100250853	16.48	44.9	46.8233	7.89333	9.96333	16.645	54.39	26.4267	26.59	60.3233	-0.217406	0.946345	0.0488513	0.979806	0.827966	0.420364	-1.64481	0.00194075	-2.47567	0.00213704
100250869	2.74	3.04333	4.59	20.2467	31.7767	3.295	7.72	10.43	18.9167	27.86	-0.44872	0.856823	-0.756044	0.735644	-1.17076	3.04018e-05	0.196364	0.657324	0.152597	0.815028
100250883	82.85	223.18	14.2367	6.30667	3.21333	38.895	19.95	29.5967	29.0733	12.6767	1.00084	0.495698	4.14852	0.000638604	-1.03234	1.96712e-05	-2.11753	4.94765e-07	-2.00439	0.00221916
100250890	22.095	5.43	8.20667	4.41333	1.84333	2.35	4.01	5.19	3.83	4.55	3.1427	0.00237773	1.06545	0.663379	0.617767	0.411153	0.261153	0.877839	-1.52197	0.0733859
100250924	0	7.28667	19.2267	51.0567	47.33	11.605	27.8667	47.6633	40.9067	41.7733	-10.9536	2.79399e-07	-1.56471	0.0590059	-1.28934	0.000389118	0.418367	0.125426	0.153802	0.842626
100250939	95.665	25.2533	27.09	17.2033	15.5767	16.915	23.2467	18.54	21.08	31.35	2.42293	0.0029305	0.698159	0.740443	0.559978	0.125008	-0.200992	0.872567	-1.25773	0.184815
100250967	6.04	88.3267	153.413	170.613	99.8267	3.765	32.8533	79.17	83.8967	71.3033	0.514554	0.869886	1.72566	0.197204	0.959294	0.742197	1.12299	4.06986e-06	0.331224	0.749744
100250998	0.785	5.17333	20.0133	35.91	46.26	15.97	19.3833	28.19	22.2033	35.3533	-4.52258	2.32712e-08	-1.55006	9.70846e-05	-0.477317	0.26794	0.791827	0.00064434	0.439981	0.619278
100251001	14.095	21.4133	26.98	40.1367	31.94	39.405	41.5933	44.1533	29.5933	23.91	-1.6239	0.00165981	-0.629331	0.269126	-0.691246	0.00345469	0.540267	0.0420755	0.320163	0.516834
100251002	3.225	0.903333	0.73	0.116667	0.13	0.325	0.316667	0.67	0.643333	0.11	3.19689	0.0047354	1.89827	0.0524622	0.150676	0.970121	-2.40608	0.0481895	0.326418	0.935836
100251039	40.28	67.1733	27.6867	3.73667	8.18667	9.215	20.69	28.7167	43.2967	4.02333	1.88359	0.311626	2.0319	0.00437513	-0.0158386	0.999362	-3.44317	1.29226e-27	1.1986	0.553609
100251046	2.33	3.69	2.16667	1.37667	0.536667	11.03	3.71333	3.18667	2.77333	0.756667	-2.35708	0.00697539	0.217378	0.960578	-0.534727	0.839679	-0.913661	0.473692	-0.625744	0.751427
100251075	1.15	1.43333	0.713333	0.52	0.306667	1.68	2.54667	1.58	0.753333	0.24	-0.698815	0.715811	-0.411438	0.838125	-1.14315	0.000276605	-0.451989	0.560743	0.283269	0.84159
100251084	1.475	1.13	1.28667	1.36	1.19333	0.385	1.50667	3.47667	4.16667	1.88	1.79222	0.147761	-0.0754636	0.973999	-1.43722	0.0317981	-1.53464	0.00289927	-0.654375	0.310263
100251100	5.395	2.44667	7.78333	73.3	143.51	15.535	9.03	52.4867	42.16	46.7267	-1.51563	0.622977	-1.29349	0.421997	-2.74178	2.04896e-08	0.88729	0.0148944	1.56641	0.0262101
100251137	0.71	0.416667	0.453333	4.37333	0.343333	1.34	0.523333	1.76333	0.07	2.26667	-1.07515	0.790822	0.279016	0.960578	-1.91673	0.0773484	6.14306	0.00946006	-3.3497	0.115439
100251144	1.67	1.77	0.643333	0.0466667	0.0166667	0.265	1.48667	0.91	1.02667	0.16	2.46188	0.396372	0.666344	0.880987	-0.503882	0.879504	-4.41745	0.000829589	-3.26694	0.364295
100251158	1.905	0.983333	1.54333	6.37667	6.51	3.15	4.29	4.99667	1.68667	4.89	-0.816225	0.854464	-1.70985	0.346274	-1.66351	0.0367565	2.01199	7.52067e-06	0.222444	0.907052
100251167	212.475	14.7767	3.22	44.76	16.7533	25.31	22.7467	15.5267	10.8033	7.85	2.82092	0.0395829	-0.342187	0.938233	-2.23525	0.00186632	2.16429	9.67698e-08	1.19668	0.302489
100251211	9.29	13.0533	10.0533	3.83333	0.52	12.36	9.91333	3.17	1.92667	2.72	-0.577248	0.766887	0.828765	0.372864	1.71459	0.00429859	1.1159	0.334598	-2.89904	0.14159
100251218	0	0.153333	0.58	1.86	4.47	0.03	0.52	2.15667	11.3867	13.5367	-1.64802	0.946345	-1.41194	0.694295	-1.87135	0.0615513	-2.51638	1.40847e-13	-1.45832	0.238064
100251222	5.26	9	13.3533	19.6333	21.69	12.57	10.71	11.0767	14.2067	21.9867	-1.40619	0.00588604	0.224455	0.939422	0.287375	0.363218	0.562317	0.00211641	-0.214995	0.884086
100251233	4.275	12.4033	25.54	31.9333	42.5567	18.59	18.6567	30.56	48.1033	35.5533	-2.23618	0.000155683	-0.252927	0.8502	-0.236048	0.583071	-0.493457	0.00195658	0.35769	0.817796
100251235	6.55	2.35	3.13667	0.886667	0.433333	3.125	4.01667	2.45	2.80333	1.06667	0.90744	0.484871	-0.479336	0.780506	0.362807	0.877404	-1.56226	0.00789456	-1.41053	0.307897
100251241	25.545	11.8567	9.91333	5.31333	1.79667	10.175	7.02	10.5233	8.47667	4.6	1.25166	0.24464	1.16388	0.00845009	-0.0647969	0.970121	-0.623323	0.146866	-1.54019	0.0372458
100251280	58.305	196.057	168.507	141.36	127.05	231.915	236.133	177.54	136.423	149.583	-2.12586	7.17164e-06	0.183208	0.947236	-0.0513047	0.970121	0.147956	0.772603	-0.721473	0.767984
100251303	337.405	149.99	80.7633	43.34	25.9433	20.47	136.627	20.2067	168.26	225.967	4.01132	0.022428	0.496059	0.811854	1.99944	0.0639014	-1.87508	0.105342	-3.37901	0.00016854
100251390	0.615	11.6833	35.32	56.9733	78.0567	10.945	24.3767	25.42	39.9433	81.73	-4.30629	5.22843e-06	-0.83979	0.671766	0.495343	0.76428	0.60861	0.694496	0.0534194	0.980667
100251398	57.985	12.55	10.65	7.14667	5.45667	9.215	7.48333	4.34	7	12.3533	2.58108	0.0014628	0.983602	0.385944	1.29485	0.0057184	0.132008	0.901144	-1.04487	0.502714
100251399	22.71	62.1333	48.2167	6.62333	5.12667	23.155	43.9667	37.6	40.8467	13.1467	-0.199573	0.931035	0.756998	0.427278	0.372513	0.618606	-2.52733	1.11696e-07	-1.39858	0.0266745
100251401	0.53	0.996667	0.92	1.56667	1.54667	2.1	1.79	1.31667	1.52667	1.95333	-2.12301	0.00460813	-0.397085	0.849688	-0.496825	0.538291	0.134059	0.880413	-0.798778	0.725491
100251407	0.135	0.326667	0.983333	6.11667	6.04	1.475	1.67333	5.51333	4.72667	14.74	-3.56037	0.0142566	-2.05626	0.0440592	-2.45856	2.86028e-07	0.461486	0.683567	-1.35719	0.00469564
100251409	119.53	404.163	214.97	237.023	224.88	344.2	280.173	252.27	184.797	295	-1.63443	0.000468358	1.14922	0.484322	-0.216341	0.843351	0.45581	0.00250943	-0.744422	0.621035
100251413	4.865	22.2167	12.9033	11.35	2.29333	4.495	8.99	1.06333	0.95	1.97333	-0.0372936	0.991935	1.71016	0.160213	3.57171	0.00365979	3.6922	0.0516854	0.0525039	0.985409
100251435	22.18	54.06	54.82	22.3833	23.9267	7.13	23.7633	16.8133	132.087	66.9233	1.56998	0.239798	1.40323	0.205225	1.7155	0.00282585	-2.46734	1.12151e-18	-1.49683	0.114843
100251454	4.885	1.74	3.05667	1.73	1.73667	2.16	1.52333	2.08333	3.74333	2.10667	1.06473	0.385662	0.578344	0.504577	0.562382	0.482773	-1.02583	4.50974e-05	-0.32192	0.752817
100251494	26.06	1.07	1.00667	5.32667	3.11667	2.785	2.69333	1.32667	0.686667	1.14667	3.09459	0.00678998	-0.95199	0.536897	-0.374271	0.970121	3.05318	4.06204e-09	0.831686	0.847704
100251506	40.355	14.27	21.1467	16.0033	23.7	13.035	17.0667	15.8133	31.1233	21.23	1.4857	0.000159899	-0.0703152	0.973999	0.441297	0.243462	-0.864344	0.0137739	0.180006	0.865477
100251525	1.4	0.7	2.28333	2.48	4.35333	1.68	2.34667	2.14	3.67667	3.54	-0.45885	0.832869	-1.39005	0.000870719	0.125472	0.952294	-0.495067	0.0340559	0.187514	0.821865
100251581	0.515	2.9	8.17333	11.4833	12.2967	4.125	8.82	13.1733	12.9533	32.2733	-3.23834	0.0345883	-1.28747	0.00904492	-0.680257	0.193075	-0.0707833	0.940001	-1.27749	0.198394
100251616	208.345	93.43	63.1367	69.15	28.0833	176.695	94.32	35.3667	21.1333	31.8067	0.108284	0.946345	0.411541	0.800449	0.859855	0.120334	1.80777	6.26644e-07	-0.781675	0.832171
100251671	11.87	1.34	2.28	5.3	7.89667	7.105	2.58667	1.35667	1.53	2.10333	0.637981	0.807026	-0.643334	0.717714	0.78121	0.395153	1.88641	6.58267e-05	1.83112	6.82149e-06
100251676	56.955	10.35	5.80667	10.17	11.09	12.975	9.8	7.30333	15.8833	29.2167	1.9316	0.0470355	0.592063	0.737924	-0.30856	0.843351	-0.544456	0.114975	-1.39443	1.61964e-05
100251688	0.07	1.02667	0.766667	0.443333	0.57	1.32	0.973333	0.766667	1.28333	6.15	-4.46607	0.15129	0.712668	0.842871	0.0041441	0.999362	-1.43358	0.10834	-3.30582	0.000118835
100251706	1.645	5.84667	3.49667	4.36	1.38333	8.06	5.03667	3.32333	3.28	2.63333	-2.40361	0.00505879	0.648401	0.619028	0.0951807	0.970121	0.509744	0.335784	-1.44497	0.461324
100251711	33.965	2.41333	0.596667	0.66	0.11	15.495	5.21333	2.75667	0.783333	2.20333	0.844351	0.881346	-0.534641	0.894763	-2.17957	0.0588364	-0.170693	0.947212	-4.64958	0.00186309
100251716	19.395	8.84667	8.41	15.61	6.34667	17.93	8.91667	13.6533	3.66333	9.16	-0.027307	0.992474	0.354603	0.595038	-0.668963	0.0986443	2.17234	0.000117209	-0.761912	0.450323
100251745	14.765	7.66	11.0533	18.53	23.1633	7.295	8.63667	10.8867	33.3067	49.8733	0.890163	0.257741	0.374389	0.8994	0.040711	0.98755	-0.74791	0.00255452	-1.09185	0.00473948
100251777	65.235	38.6967	3.79667	0.0766667	0.23	16.83	7.85333	2.44667	0.783333	0.05	1.77509	0.00763993	2.71488	8.60272e-08	0.659578	0.403908	-3.27332	0.0180391	2.01547	0.484734
100251782	11.61	10.8533	10.74	16.9967	8.37333	23.245	18.61	8.82667	8.53667	16.1467	-1.08408	0.386825	-0.255434	0.946794	0.292461	0.758179	1.08484	0.00778916	-1.27714	0.280623
100251783	4.145	0.186667	0.226667	0	0	0.16	0.136667	0.0133333	0.0166667	0	4.5879	1.51843e-05	0.69813	0.946944	3.83831	0.236082	-0.814489	0.940001
100251788	0.605	0.616667	0.153333	1.95333	10.5767	1.03	1.55	3.35	2.43667	1.57333	-0.99156	0.821229	-0.876413	0.735919	-4.66376	7.64526e-08	-0.229927	0.89756	2.50815	0.00615848
100251794	2.825	12.3167	16.9467	7.15333	6.55333	2.7	5.91333	11.0533	23.1567	14.5667	-0.149538	0.971684	1.76528	0.365145	0.61207	0.480715	-1.59548	1.53608e-11	-1.31751	0.0172767
100251830	20.085	49.5333	74.3833	35.08	38.9667	19.89	21.9833	27.8633	38.8333	39.8733	-0.179772	0.955258	1.46907	0.0286163	1.45041	5.15279e-06	-0.0418111	0.943379	-0.283389	0.874217
100251837	14.385	8.12667	5.06333	10.47	3.72	4.74	6.48	3.12333	3.85	8.7	1.51668	0.119324	0.738256	0.69066	0.717157	0.11344	1.53168	0.00122482	-1.64268	0.260966
100251862	37.99	29.6567	12.0567	3.13	1.24667	16.18	11.88	5.16333	5.15	11.1133	1.13685	0.744092	1.92062	0.131464	1.26058	0.0116982	-0.627541	0.300959	-3.67632	0.00860212
100251929	0.205	0.0233333	0.0233333	0	0	0.105	0.693333	0	0.0466667	1.44	0.949169	0.946345	-4.2623	0.446834	1.00193	0.970121	-1.71927	0.903457	-21.5672	1.10102e-05
100251957	7.005	0.403333	0.463333	0.136667	0.09	0.635	0.86	0.163333	0.1	0.446667	3.37449	0.00759575	-0.728781	0.91497	1.59716	0.71504	0.558579	0.880413	-2.86189	0.402237
100251967	5.24	4.41667	5.96667	37.2833	39.9533	9.515	12.43	16.4367	16.38	28.81	-1.00451	0.356914	-1.03209	0.271749	-1.43927	0.00223676	1.27878	6.53504e-05	0.0721427	0.97595
100251973	13.92	6.88667	2.09333	0.22	0.0666667	4.6	1.66667	0.516667	0.396667	0.25	1.42732	0.252259	2.4249	0.000213948	2.03784	0.110332	-0.747966	0.838553	-2.23883	0.645391
100251985	146.93	27.1433	13.6933	0.76	0.18	98.35	12.0833	2.29333	0.81	0.463333	0.493389	0.869347	1.39013	0.581694	2.59915	0.00420064	0.0110287	0.994624	-2.03575	0.705529
100251998	54.75	9.83667	17.4467	56.0133	27.1767	11.33	22.7733	19.99	94.5967	84.11	2.1316	4.26662e-06	-0.796492	0.688758	-0.155058	0.970121	-0.675815	0.773239	-1.50871	0.176505
100252004	938.16	299.83	130.38	10.94	7.41667	176.315	49.19	27.99	5.91	5.24	2.30111	0.000147516	3.21439	0.0019754	2.24816	1.79465e-05	0.995481	0.232799	-0.0560547	0.990243
100252020	12.16	5.95667	8.02	3.39667	1.92667	8.355	5.47	5.96667	9.21	5.3	0.39284	0.779824	0.49655	0.548945	0.447064	0.247717	-1.34189	2.12519e-06	-1.50236	0.00012144
100252024	4.935	11.3367	26.67	24.7967	20.81	16.545	17.6533	21.09	17.96	14.6367	-1.88963	0.00146007	-0.246506	0.909267	0.364491	0.604303	0.563157	0.00181996	0.4802	0.281022
100252037	255.035	39.9	25.0833	7.48	1.73	18.81	27.39	16.6867	13.31	16.2667	3.71245	0.00468479	1.0124	0.355321	0.61057	0.0321096	-0.757014	0.611189	-3.75863	0.00772888
100252049	5.705	11.6567	21.4033	24.4767	20.8967	5.815	16.2333	15.6533	55.1667	66.4567	-0.156331	0.946345	-0.194108	0.952218	0.446803	0.810512	-1.07034	0.00660168	-1.59994	0.086171
100252054	3.805	0.7	1.02	0.403333	1.03667	2.735	1.63667	1.04667	1.50333	1.06333	0.367081	0.931035	-0.910079	0.71878	-0.0286993	0.999362	-1.81004	0.00140169	-0.390585	0.886654
100252066	137.18	0.163333	0.0933333	0.313333	0.216667	1.92	0.186667	0.0933333	0.0933333	0.116667	5.97521	2.53521e-05	0.100921	0.98418	0.0369644	0.999362	1.86375	0.60198	0.749972	0.863957
100252094	2.1	2.44333	1.53333	2.77667	1.68333	2.58	2.77667	1.85667	1.05667	0.506667	-0.391145	0.856342	0.129626	0.960578	-0.256163	0.949354	1.48725	4.24028e-05	1.54056	0.0273663
100252095	59.315	30.9833	26.28	17.78	22.96	20.75	25.06	26.3267	24.6967	27.4533	1.37766	0.000126542	0.844665	0.537134	0.0183017	0.992811	-0.378158	0.031303	-0.483392	0.657102
100252098	8.18	3.31333	1.11333	2.42333	3.52667	6.07	5.45333	2.94333	2.92333	3.02333	0.298641	0.881013	-0.403509	0.741708	-1.39022	0.00571749	-0.177974	0.856297	0.241233	0.868542
100252101	0	2.55	0	0	0	0	0	0	0	0.416667			21.3739	2.14099e-05					-4.43525	0.237111
100252122	25.42	32.6967	47.64	34.3233	17.35	45.74	31.9333	35.5233	11.4567	6.25333	-0.95378	0.341558	0.302958	0.926507	0.440515	0.355689	1.68317	2.53121e-05	1.45198	3.40798e-05
100252129	446.995	231.483	173.533	87.5367	43.2233	204.395	144.967	130.753	110.893	62.3433	0.995038	0.240762	1.06043	0.00341963	0.423628	0.487776	-0.244409	0.78118	-0.772232	0.457785
100252136	31.41	20.9733	9.14667	5.44333	4.43	12.245	8.63	13.3167	18.4233	6.43667	1.21078	0.0326369	1.73816	0.037216	-0.513724	0.36965	-1.66631	3.98777e-07	-0.761942	0.528732
100252158	3.99	0.453333	0.186667	0.0766667	0.0466667	0.225	0.08	0.03	0.0366667	0.0133333	3.96697	0.00110954	3.05552	0.176838	2.62206	0.193551	1.13777	0.786472	1.87321	0.737942
100252168	142.71	93.7167	50.6467	19.7167	26.37	92.455	85.4033	101.383	79.0133	37.42	0.515584	0.789051	0.364546	0.877375	-0.97273	0.000376038	-1.90567	5.25918e-12	-0.418897	0.739202
100252174	5.47	1.48333	2.30667	1.36333	0.823333	1.615	1.81	1.16667	1.38	0.723333	1.6142	0.00539752	0.046526	0.973999	1.00507	0.0171957	0.0697495	0.958019	-0.0198407	0.994757
100252177	3.3	1.59667	2.36667	2.06333	0.616667	2.43	1.8	1.15	0.23	0.69	0.308256	0.905174	0.164284	0.968637	1.08292	0.257879	3.25829	1.55985e-07	-0.698499	0.873012
100252212	21.45	10.0067	8.17667	11.3733	3.28667	19.13	9.87	6.75333	5.72333	7.51333	0.082611	0.970255	0.424324	0.804158	0.29538	0.523932	1.08155	0.00153405	-1.36284	0.0294504
100252277	1.83	0.82	2.23	6.2	8.91	3.525	3.60667	2.43	4.02	5.49	-1.09603	0.267465	-1.79179	0.00132326	-0.105345	0.970121	0.722679	0.0313552	0.588478	0.250332
100252291	5.52	1.37667	1.41667	1.09667	0.733333	0.995	1.71333	2.25	3.46	2.45333	2.39936	0.346291	0.0222024	0.986765	-0.656432	0.313702	-1.56824	0.000259555	-1.66443	0.0676959
100252351	3.795	0.523333	0.46	0.143333	0.106667	0.32	0.36	0.193333	0.343333	0.36	3.43151	6.83763e-08	0.868825	0.519607	1.25174	0.400847	-1.16686	0.271354	-1.97006	0.157566
100252389	77.115	77.7633	24.8433	6.25333	0.703333	59.51	35.4233	7.53333	2.78333	1.66333	0.209871	0.927747	1.57358	0.00129557	1.72329	0.150018	1.26817	0.640552	-1.54485	0.449704
100252432	120.5	17.8167	21.7567	18.5867	10.9833	26.355	16.77	17.0867	16.9567	11.0733	2.04871	2.28947e-07	0.408551	0.765354	0.370774	0.203029	0.23304	0.655921	0.0628102	0.963103
100252448	16.75	4.91333	7.91667	8.54667	6.41333	5	5.1	5.64333	8.27667	7.19667	1.62778	0.00165981	0.334156	0.812618	0.514785	0.446088	0.139546	0.78047	-0.094383	0.936704
100252463	4.215	6.42667	20.0167	29.47	24.8933	8.945	7.91	9.27333	13.7833	21.8967	-1.14833	0.536945	0.234633	0.960578	1.12459	0.00437311	1.19847	0.000153804	0.0308951	0.980667
100252495	67.83	23.6867	10.6033	9.36667	4.79	29.015	58.5533	27.3567	24.2433	16.2233	1.11454	0.726393	-0.886423	0.365658	-1.3642	1.25056e-05	-1.29114	0.0548526	-1.92229	0.000264729
100252499	26.71	51.0333	57.2867	41.43	42.6867	16.675	37.0333	76.2833	81.5467	102.787	0.490147	0.906083	1.10658	0.650172	-0.414202	0.739958	-0.870788	0.0470931	-1.36241	2.1483e-05
100252506	165.55	171.287	201.073	80.58	77.0433	229.795	195.507	157.257	121.95	27.9033	-0.591674	0.629075	0.0259009	0.987782	0.388683	0.622467	-0.496804	0.307413	1.43424	2.33263e-05
100252511	47.01	64.6633	33.8967	34.9767	26.1933	52.67	41.1667	39.1433	69.8867	90.4033	-0.325861	0.80418	1.3177	0.462323	-0.198341	0.870711	-0.898912	1.45282e-06	-2.0596	0.00492741
100252516	14.78	14.86	8.31667	2.08	1.60333	20.68	13.44	8.84333	7.71667	1.02667	-0.700696	0.799795	0.447349	0.83746	-0.0650756	0.970121	-1.79114	0.000497222	0.572027	0.734525
100252547	37.225	13.36	5.26667	3.97	4.24	2.075	2.59333	1.59	0.883333	0.893333	3.94724	0.00277945	2.6166	2.09389e-05	1.74215	0.0080619	2.25998	0.00037583	2.16846	1.9566e-05
100252575	19.895	53.8933	55.11	54.2033	62.7433	45.03	46.8733	52.7	64.1767	89.1933	-1.29126	0.0086729	0.724251	0.606154	0.0831497	0.958304	-0.149254	0.369428	-0.686273	0.324165
100252623	291.78	61.9367	82.7667	38.37	53.4	53.685	59.8167	54.4733	72.1467	57.39	2.25193	9.00721e-05	0.41393	0.708666	0.660085	0.0439628	-0.655664	0.00157998	0.270066	0.873012
100252634	44.435	12.8267	5.16333	15.7033	9.4	4.18	7.51333	6.63667	20.02	58.9567	3.1834	0.00615289	1.20784	0.284428	-0.35163	0.84089	-0.234761	0.903048	-2.51633	0.041434
100252686	0.585	1.52333	2.66333	3.44667	3.99	2.915	3.15333	3.54667	4.09	4.08	-2.45701	0.00497193	-0.705543	0.314479	-0.394401	0.604059	-0.151241	0.817629	0.0403687	0.981158
100252695	3.62	0.16	0.86	0.463333	0.453333	0.07	0.19	0.4	0.636667	0.236667	5.48401	0.00902119	0.0125454	0.997119	1.11888	0.554797	-0.3578	0.901659	0.939838	0.633742
100252717	0.605	0.72	1.66333	4.60667	5.06667	1.215	2.41333	4.03333	9.72	20.9233	-1.07695	0.691366	-1.34701	0.0393228	-1.29639	0.128672	-0.980773	0.0542344	-1.9685	0.00572591
100252738	207.725	33.5967	25.4033	7.74333	3.92	59.3	23.92	12.02	5.04667	1.17667	1.69974	0.00747802	0.835834	0.280929	1.10261	0.0715032	0.713789	0.528704	1.35219	0.462085
100252747	3.12	0.3	0.756667	4.24	2.15667	0.665	0.54	0.563333	1.36333	2.89667	2.16601	0.175008	-0.443501	0.935712	0.429579	0.911226	1.73797	1.38067e-05	-0.71384	0.631597
100252759	6.965	1.02	0.893333	0.406667	0.133333	1.11	0.733333	0.44	0.223333	0.13	2.50748	1.51275e-05	0.880954	0.656133	1.07095	0.506151	0.997355	0.433239	0.00908658	0.997569
100252779	111.09	199.68	85.6767	20.0733	26.92	56.085	137.183	150.943	163.28	11.6667	0.710633	0.871165	0.830661	0.577902	-0.78818	0.783089	-2.92816	1.58781e-35	1.38549	0.452402
100252798	37.165	78.5867	105.53	103.77	103.533	130.63	129.687	123.813	97.4133	106.473	-1.9246	0.000287234	-0.360632	0.662453	-0.200174	0.916434	0.18849	0.301645	-0.120008	0.86013
100252820	1.73	0	0.06	0.01	0.04	0.165	0	0.03	0.05	0.02	3.24209	0.00689897			1.0325	0.942355	-2.08859	0.774383	1.07311	0.935836
100252844	18.375	4.01	5.29333	9.17667	12.62	9.69	7.32333	5.76	4.36667	5.28	0.765456	0.329718	-0.561258	0.604119	-0.100233	0.970121	1.16734	4.07279e-06	1.17518	0.012852
100252859	3.485	30.02	102.513	71.32	36.6867	118.625	52.2733	76.64	33.1467	36.84	-5.1657	1.07921e-05	-0.390789	0.763317	0.466014	0.684591	1.20424	0.212361	-0.369184	0.883553
100252878	30.85	20.55	56.0767	151.13	124.507	32.245	47.7033	109.53	79.7633	73.9833	-0.188769	0.946345	-0.793829	0.446834	-0.950974	0.179671	1.0164	1.0948e-05	0.752863	0.0626397
100252889	0.06	0.0466667	0.0166667	2.35	0.1	0.09	0.0833333	0.503333	0.0366667	0.786667	-1.11453	0.946345	-0.361555	0.973999	-4.86939	0.00512082	6.21425	0.135648	-3.54426	0.283917
100252896	1.92	9.05	9.13667	4.73667	17.05	17.26	18.15	1.89667	1.01667	2.13333	-3.34019	0.0117466	-0.494928	0.955575	2.33271	0.00298429	2.38729	0.00170395	2.42473	0.296734
100252934	3.57	5.53333	3.44333	3.80667	2.02	5.095	5.75	2.94	4.93667	4.32667	-0.621621	0.668625	0.215379	0.925273	0.234406	0.91588	-0.279448	0.717584	-1.12663	0.00564485
100252941	30.89	20.3133	16.6467	44.56	47.6267	40.965	31.1333	20.1833	21.0133	52.79	-0.515487	0.5561	-0.1466	0.961652	-0.259957	0.753995	1.1788	7.88384e-13	-0.373316	0.761186
100252949	11.36	5.09	3.22333	0.94	0.146667	0.43	4.47	0.47	9.06667	6.51667	4.76251	0.0197875	0.734844	0.708545	2.8587	0.00888429	-3.25338	0.0768843	-6.09471	0.000137859
100252964	0.085	5.19333	8.07	11.1967	4.23333	10.35	10.3233	16.58	24.0867	3.70667	-7.07737	1.70095e-06	-0.781254	0.736607	-1.0206	0.108056	-1.01191	0.0305223	-0.0941256	0.96397
100252985	3.79	10.7467	17.1033	31.3	44.5733	9.9	17.62	24.31	36.8967	30.6167	-1.52566	0.000530604	-0.297075	0.853231	-0.487837	0.210132	-0.143958	0.880413	0.517361	0.177921
100252988	7.175	2.36	2.30333	4.83333	4.56	6.92	5.89	3.05333	2.19333	4.16667	-0.0764255	0.958312	-0.873708	0.52374	-0.318416	0.633096	1.20207	9.14104e-06	-0.0779517	0.953827
100252996	19.835	1.54667	0.87	1.23	1.10333	4.53	1.51	1.06667	1.67333	1.61	2.01734	0.00238699	0.401673	0.875564	-0.28811	0.947434	-0.352582	0.665996	-0.597575	0.419658
100253000	4.29	6.31333	6.44333	1.16	0.81	3.655	4.58333	1.74667	3.24	2.02	0.102288	0.977516	0.855454	0.40556	1.89696	6.15806e-06	-1.38702	0.0149163	-1.59441	0.262663
100253026	13.145	3.89667	4.15333	1.99333	3.9	3.795	1.46	0.653333	1.16	0.906667	1.7411	0.267605	2.05326	0.227039	2.69468	0.000988504	0.867406	0.669227	1.69106	0.319883
100253027	0	5.15	24.7933	42.0267	49.2233	0.32	3.64333	30.35	31.1367	12.3867	-5.70196	0.388648	1.274	0.765024	-0.275182	0.970121	0.529643	0.749879	1.99934	2.41354e-05
100253030	39.165	8.60667	12.3933	8.75667	7.07667	15.155	13.8233	15.4533	23.31	13.03	1.19157	0.231309	-0.362841	0.71506	-0.300373	0.531637	-1.31959	1.89679e-06	-0.893014	0.0098956
100253046	20.125	1098.41	1860.4	4703.4	6607.02	695.33	1363.68	3405.47	3285.04	4882.68	-5.16438	0.00171344	0.31972	0.95497	-0.834576	0.713031	0.613726	0.0220283	0.0284115	0.994757
100253057	0.935	2.10333	1.32	3.14333	2.56333	1.63	2.40333	1.82	1.53	3.73333	-0.953578	0.421564	0.259621	0.937641	-0.451455	0.743583	1.08879	0.000451665	-0.74357	0.329926
100253071	4.025	2.94	1.46333	0.523333	0.243333	3.525	3.29	1.84	1.41	1.21333	-0.0366587	0.993854	0.363561	0.907886	-0.319487	0.864363	-1.33971	0.00270451	-2.79814	0.0672278
100253072	219.715	21.54	17.8667	15.7167	3.06667	31.945	31.67	5.74333	6.37333	13.1733	2.73612	0.655196	-0.0587628	0.976034	1.67105	4.34768e-05	1.37863	0.594589	-2.32312	0.184815
100253073	0.92	50.95	40.7067	5.76333	2.16667	29.79	39.1133	11.9367	10.8333	1.77333	-5.09191	0.000306849	0.666014	0.590769	1.79481	4.59909e-06	-0.802657	0.732197	-0.298677	0.935836
100253083	0.21	0.0233333	0.0133333	0.516667	0.47	0.32	0.19	0.706667	4.32667	7.75667	-0.768696	0.9113	-2.57395	0.618446	-5.7542	0.0108107	-2.97934	0.000347097	-3.94596	4.24798e-07
100253085	659.005	154.47	14.73	18.63	8.16667	52.62	29.9033	25.7967	36.81	53.9	3.60174	0.00110817	2.9152	0.0279263	-0.789261	0.00322103	-0.893539	0.101629	-2.59052	0.030944
100253090	29.77	23.3867	45.32	20.1833	23.1367	45.555	14.2833	18.36	13.14	12.53	-0.707115	0.692665	0.998246	0.422592	1.34733	1.54471e-05	0.731061	0.194436	0.609452	0.687108
100253093	28.355	0.593333	0.253333	0.416667	0.363333	2.3	0.19	0.173333	0.753333	0.72	3.51774	0.000202134	1.9307	0.214193	0.562776	0.946925	-0.759462	0.517908	-0.834944	0.742863
100253113	14.235	31.29	72.0267	184.92	202.443	29.79	40.3167	82.0067	81.45	86.3367	-1.17578	0.289775	0.00203395	0.998412	-0.161022	0.827687	1.27847	9.33414e-33	1.2016	1.18273e-09
100253142	4.385	1.26667	1.83	1.87333	1.38667	0.945	1.21667	1.00667	8.36667	7.99667	2.12465	0.155667	0.359893	0.905322	0.878861	0.178806	-2.05607	0.00114097	-2.38522	0.0408286
100253166	0.37	0.323333	0.106667	5.50667	0.636667	0.43	0.0966667	1.52667	0.1	1.31	-0.471468	0.958143	2.58365	0.72252	-3.96763	0.00205644	5.96308	0.0715588	-1.5931	0.686281
100253189	0.08	0.0133333	0.0533333	0.33	0.0533333	0.04	0.04	0.0666667	1.72	2.72	0.666697	0.97131	-0.946551	0.960578	-0.306579	0.979968	-2.30554	0.156544	-5.50719	9.7703e-05
100253196	50.15	4.06	1.97667	0.22	0.24	5.255	0.84	1.46667	0.846667	0.543333	3.12798	0.0302415	2.92191	0.019406	0.432397	0.819795	-1.84162	0.00427795	-1.44982	0.35675
100253218	3.905	2.12333	0.8	0.306667	0.0933333	1.495	2.40333	0.59	0.303333	0.753333	1.31782	0.552891	0.323837	0.927666	0.443754	0.85053	0.074049	0.968999	-3.42606	0.00464593
100253231	44.56	34.58	34.5267	47.6633	32.5967	66.685	54.26	34.88	20.2833	14.7933	-0.682679	0.283249	-0.358671	0.790453	0.00864959	0.999362	1.34311	1.46256e-09	0.93839	0.235986
100253275	0.38	1.47333	7.89333	3.49333	5.38333	0.97	1.25333	1.36	6.27333	4.38333	-1.37208	0.862519	0.511508	0.915823	2.60041	0.00031363	-0.745119	0.390194	0.265557	0.904476
100253292	5.365	2.24667	5.84333	3.25667	4.38	1.87	4.78	8.00667	9.38	7.34	1.31839	0.744386	-0.596128	0.814914	-0.470435	0.914019	-1.42503	0.000982884	-0.802246	0.103395
100253303	1.045	0.653333	0.413333	0.53	0.386667	0.75	0.646667	0.413333	0.496667	0.93	0.330238	0.924776	0.347408	0.880413	0.0322991	0.999223	0.18826	0.884801	-1.33931	0.00403019
100253306	0	0.06	0.13	0.143333	0.18	0.01	0.0666667	0.16	0.883333	0.813333	-1.64802	0.946345	0.046532	0.992815	-0.254222	0.970121	-2.53002	0.0077138	-2.53223	0.0908766
100253324	179.65	70.8967	53.6567	56.23	70.3833	66.17	58.6067	65.6967	66.0533	59.21	1.31581	0.00145398	0.726826	0.360485	-0.272644	0.147635	-0.137253	0.68613	0.0505784	0.967825
100253346	17.59	1.28667	0.95	0.843333	0.33	0.645	0.39	0.303333	0.676667	0.98	4.64467	1.84478e-06	1.9925	0.134497	1.66128	0.0919909	0.411177	0.793915	-1.41026	0.540207
100253356	32.725	12.24	12.17	3.24333	2.75667	6.345	5.66333	5.89	5.47	8.74333	2.24608	0.000243264	1.43345	0.0332426	1.05597	0.116465	-0.66073	0.134502	-1.54765	0.13807
100253378	19.58	1.28	0.42	0.24	0.0966667	0.845	0.656667	0.513333	0.583333	0.263333	4.36984	0.000709612	1.36199	0.410339	-0.280372	0.970121	-1.16696	0.565116	-1.29962	0.761186
100253412	1.085	0.34	1.03	1.49667	0.923333	0.29	0.126667	0.686667	0.226667	0.273333	1.74895	0.676933	1.89813	0.464918	0.597563	0.90091	2.82054	0.00402364	1.51893	0.329543
100253418	3.105	0.503333	0.116667	0.0666667	0.0266667	0.26	0.106667	0.0233333	0.0366667	0.0733333	3.51866	1.14223e-06	2.96378	0.0561617	2.8986	0.263959	0.941551	0.806294	-1.57654	0.514595
100253436	5.165	2.88333	2.38667	2.80667	1.38333	3.345	4.94667	1.63667	1.13	1.57667	0.508059	0.781493	-0.466095	0.820133	0.547762	0.509224	1.4057	2.71957e-07	-0.176262	0.927061
100253444	0.775	0.483333	0.336667	2.98	0.77	0.895	0.736667	0.676667	0.45	1.77333	-0.293085	0.960387	-0.400263	0.944473	-0.989982	0.481712	2.81253	0.00335493	-1.41628	0.135783
100253481	21.81	109.92	104.283	123.657	103.727	93.925	118.15	147.527	115.967	131.463	-2.23401	4.94163e-05	0.4443	0.860117	-0.481836	0.0613252	0.194658	0.505063	-0.761744	0.694226
100253486	36.715	7.27333	9.30333	4.32667	1.54333	10.83	4.04	3.27	4.74333	2.43333	1.67688	0.268651	1.25697	0.139921	1.52186	0.00730996	-0.033773	0.981605	-1.00391	0.563943
100253492	90.335	119.783	47.49	48.3367	69.59	66.61	45.9733	26.0767	230.133	316.31	0.292692	0.91824	2.01369	0.0883034	0.871943	0.0186778	-2.14429	0.00465378	-2.139	0.00657773
100253493	10.66	71.53	111.623	80.4433	61.9467	8.54	23.7467	59.8833	42.3733	132.283	0.0891522	0.982045	2.08502	0.0626301	0.905662	0.610284	1.02477	6.86794e-06	-1.08051	0.375698
100253496	30.94	9.04	8.08667	4.05	2.65667	5.835	10.9767	7.69	4.92667	6.75	2.26874	0.00109463	0.00894672	0.99434	0.0947928	0.970121	-0.194688	0.903457	-1.41404	0.0268537
100253523	29.62	34.4133	38.22	28.93	25.32	28.815	35.06	35.7067	47.6933	51.1267	-0.102785	0.946345	0.448507	0.745603	0.112528	0.870385	-0.627587	0.000138455	-1.09599	0.000168039
100253548	185.8	87.27	33.2867	10.81	7.76333	35.82	49.6333	70.85	46.8833	7.90667	2.27332	0.00449389	1.13089	0.0278485	-1.05957	0.000123449	-2.02577	9.60906e-10	-0.0662274	0.935836
100253553	0.025	1.14333	0.53	0.873333	0.463333	0.11	0.206667	0.496667	0.88	0.58	-2.06333	0.844781	2.99779	0.00456768	0.125578	0.973435	0.082059	0.952342	-0.748171	0.777677
100253641	19.895	4.93667	4.70667	4.58333	4.69	5.145	6.59667	4.20667	5.48667	4.34	1.84545	0.00116182	-0.0708541	0.973999	0.178849	0.881482	-0.168151	0.872616	-0.0931317	0.937365
100253660	116.29	1877.88	1534.32	5249.57	6440.78	3090.84	3206.99	5371.18	4484.45	4620.83	-4.86412	3.4837e-09	-0.288533	0.951823	-1.75854	0.0836927	0.319897	0.458236	0.0991285	0.959882
100253669	117.13	19.33	22.38	33.6833	18.4167	37.585	47.7833	25.3833	14.73	20.47	1.41822	0.37505	-1.00526	0.126168	-0.173889	0.970121	1.29825	0.00275843	-0.0370699	0.991489
100253718	186.665	324.777	648.347	940.153	707.817	666.43	713.447	801.1	431.45	369.787	-1.9595	1.84478e-06	-0.850447	0.349139	-0.291515	0.676104	1.21691	3.57014e-07	0.898061	6.34931e-05
100253748	97.425	3187.66	5176.5	6967.37	8242.66	1919.07	4048.07	6043.51	8236.42	5596.99	-4.46681	8.31764e-05	-0.0831437	0.973999	-0.188276	0.951922	-0.141597	0.602224	0.635231	0.50116
100253773	139.94	21.4867	5.83667	2.93	0.73	15.77	7.35333	3.46667	2.83333	2.42333	2.91369	1.35096e-06	2.15332	0.0521142	0.719184	0.17644	0.136229	0.940001	-2.17197	0.11962
100253821	14.23	18.08	20.9233	77.5867	123.603	13.85	24.22	48.2633	73.01	71.3033	-0.108008	0.952725	0.101776	0.973999	-1.19507	0.00318196	0.188389	0.737859	0.872313	0.238536
100253842	8.565	1.97667	0.733333	0.553333	0.306667	4.645	0.576667	0.85	0.473333	0.92	0.783704	0.652774	2.16042	0.000164612	-0.197317	0.970121	0.347663	0.880413	-1.86981	0.11962
100253862	11.81	30.9767	24.0267	24.6	18.3033	27.22	19.7267	20.9767	9.95333	33	-1.25774	0.403365	1.16154	0.301333	0.218281	0.673524	1.396	0.000484369	-1.38694	0.504117
100253895	42.1	3.53	2.04333	1.48667	0.47	6.35	3.63333	2.42667	1.68	2.26333	2.62484	0.00075304	0.436513	0.895783	-0.235373	0.970121	-0.0807741	0.940001	-2.56892	0.0149771
100253928	28.475	55.0533	39.4867	26.38	25.3867	24.85	43.0033	39.93	46.95	56.6667	0.0982145	0.967228	0.822404	0.347275	-0.00437772	0.999362	-0.737738	0.00106956	-1.3174	0.00972961
100253943	62.74	3.02667	3.27667	1.12333	0.396667	1.82	5.06667	3.69	5.82333	3.54	5.0831	6.19387e-06	-0.244717	0.960578	-0.195361	0.970121	-2.28683	0.0235309	-3.4972	0.00804064
100253955	8.25	12.46	14.9033	16.6033	15.2333	17.985	14.3667	11.6067	7.87667	12.0933	-1.26581	0.0627928	0.171703	0.943906	0.373334	0.470686	1.17708	9.39519e-05	0.382084	0.770376
100253967	3.49	0.0866667	0.223333	0.26	0.103333	0.12	0.573333	0.2	0.16	0.936667	4.80819	0.00239902	-2.41796	0.366108	0.145802	0.98755	0.801675	0.790904	-3.31438	0.0872642
100253970	7.285	1.77333	3.14333	2.2	1.53333	1.59	1.29667	1.79	3.2	2.68667	2.0909	0.00412145	0.964656	0.621259	0.824681	0.0135521	-0.443304	0.435369	-0.978722	0.299476
100253991	7.79	1.67667	1.74667	0.843333	0.233333	3.425	1.87	0.643333	1.27667	0.343333	1.05724	0.271895	0.205794	0.96037	1.47475	0.00370951	-0.513538	0.573316	-0.910028	0.794461
100254004	0	0.366667	1.07333	1.51	1.87	0.22	0.876667	1.51	5.57667	6.16667	-5.43388	0.373455	-1.0853	0.696681	-0.469812	0.877869	-1.80536	4.09045e-07	-1.62348	0.0705046
100254006	35.275	17.0233	6.65	1.7	0.446667	6.88	9.08	5.95	2.78	1.32667	2.22808	5.7059e-05	1.46927	0.145582	0.169952	0.88614	-0.617799	0.212194	-2.06198	0.266656
100254013	1.27	1.33333	3.52667	3.38667	3.15	0.8	1.21333	1.25667	2.32333	2.27	0.556262	0.859765	0.471461	0.759207	1.51447	0.00177985	0.643411	0.160371	0.430034	0.487044
100254037	19.99	13.55	9.13667	2.85667	0.853333	12.605	17.08	9.26667	3.95333	6.13	0.516411	0.511143	0.0164115	0.97832	-0.0175311	0.999362	-0.375114	0.704001	-2.84972	3.99453e-14
100254045	1.655	0.46	0.826667	19.5267	0.92	4.015	0.686667	6.05333	0.24	2.88	-1.44472	0.65624	-0.347928	0.960578	-2.84083	0.000283578	6.48544	0.0574764	-2.00886	0.305609
100254086	10.03	5.93667	3.06667	1.21333	0.533333	2.3	3.88	2.17333	2.63	2.17667	1.96837	0.000207955	0.986148	0.0783051	0.505273	0.564661	-1.01578	0.0652749	-2.15723	0.000734478
100254096	7.185	11.4367	3.34	0.983333	1.16333	2.31	2.31667	2.09333	0.916667	0.486667	1.48555	0.393604	2.71883	5.47514e-10	0.697783	0.602878	0.19236	0.943396	0.827247	0.7592
100254204	72.2	52.1867	45.7967	99.2333	101.153	82.955	114.517	112.153	103.7	80.2933	-0.348007	0.888549	-0.678479	0.511615	-1.26146	0.00031893	0.0323095	0.955092	0.208667	0.801129
100254212	18.51	1.05	1.25333	0.173333	0.0166667	0.47	3.5	0.216667	0.626667	0.656667	5.16864	0.00173538	-1.51364	0.572153	2.61149	0.109884	-1.79703	0.561844	-5.2488	0.00947372
100254231	272.695	155.03	129.63	72.4367	75.4133	177.405	147.393	62.7	133.293	107.42	0.487328	0.920408	0.437654	0.576087	1.06995	0.000662661	-0.793381	0.13507	-0.689012	0.446424
100254233	31.645	215.46	25.8367	1.74667	0.573333	169.525	27.0567	0.753333	0	0.0733333	-2.61706	0.00166028	3.18135	0.0267564	5.13345	0.140622	20.8995	5.9483e-06	2.38044	0.677086
100254237	3.995	1.08	1.83	0.676667	0.503333	0.755	1.00333	0.8	0.713333	0.643333	2.25533	0.000102372	0.363272	0.877001	1.21398	0.02131	0.00963834	0.991947	-0.363293	0.787147
100254239	19.225	22.42	32.24	13.94	10.57	52.615	27.0467	13.84	8.02	11.7967	-1.55332	0.0198387	-0.0353504	0.982077	1.24419	6.72475e-07	0.90077	0.0178898	-0.114334	0.935836
100254252	30.07	48.57	4.64	3.82	2.71333	16.17	8.08	15.9967	19.1	7.18333	0.796854	0.687208	3.29256	0.0353321	-1.76225	3.47649e-07	-2.25502	7.73969e-11	-1.51124	0.00763244
100254275	27.98	39.19	34.1567	18.2733	27.8967	17.735	35.6833	25.84	42.55	36.5633	0.557161	0.821671	0.41287	0.808717	0.418375	0.372415	-1.12708	2.48128e-05	-0.445758	0.44159
100254279	12.585	11.5567	18.43	27.4367	16.24	6.135	12.88	11.12	7.60667	4.37333	0.801261	0.78617	0.116433	0.973999	0.735891	0.289723	1.9486	5.66248e-07	2.00505	0.0346217
100254297	0.195	0.276667	0.476667	0.44	0.193333	0.65	0.373333	0.236667	0.0633333	0.16	-1.93253	0.460028	-0.0222989	0.99087	1.04436	0.536108	2.93123	0.000625951	0.120436	0.948991
100254327	18.97	4.57333	5.21333	3.84667	2.56333	4.88	2.17667	3.61	3.43667	2.35333	1.87874	0.0440103	1.39324	0.00831297	0.536748	0.695316	0.25533	0.759581	-0.0101653	0.994757
100254364	25.72	95.2233	42.32	12.14	7.15333	29.62	61.8933	27.1433	23.91	39.7233	-0.258895	0.946345	1.1205	0.301281	0.643927	0.428875	-0.888606	0.186057	-2.7715	0.00830827
100254372	2.37	2.50667	6.09667	45.8233	32.75	14.23	16.1067	13.0567	19.2733	43.21	-2.72023	8.59284e-05	-2.30777	5.22738e-06	-1.0723	0.0140244	1.3487	8.13475e-11	-0.593657	0.469762
100254375	6.665	8.86333	1.75667	0.473333	0.04	5.045	2.09	0.243333	0.14	0.0833333	0.148207	0.971014	2.55019	0.00123287	2.8501	0.006829	1.84708	0.315871	-0.867187	0.904476
100254391	9.935	9.8	24.8533	33.7133	5.96333	19.885	12.55	12.74	1.67	0.673333	-1.06761	0.539007	-0.141969	0.973999	0.971386	0.116465	4.43308	0.000116845	3.07161	2.80538e-06
100254397	29.06	40.0233	30.1733	46.4833	56.3333	43.74	31.11	57.5133	83.87	137.22	-0.727886	0.156851	1.009	0.622672	-0.910237	0.00659886	-0.756029	1.78607e-05	-1.40187	0.000289983
100254405	40.255	2.28	1.32333	1.47	1.05333	2.35	1.10333	1.11333	1.31667	0.416667	4.06367	0.00271941	1.36016	0.260092	0.285757	0.970121	0.264373	0.883937	1.26966	0.381541
100254418	41.615	47.5967	26.9667	31.6233	8.33	93.085	31.61	29.93	19.0533	29.51	-1.30675	0.00246344	1.17924	0.442453	-0.125963	0.970121	0.820584	0.0852288	-2.39255	0.188346
100254556	5.555	3.49	7.17	12.8667	12.77	5.915	12.5033	16.45	11.6033	7.69333	-0.216727	0.946345	-1.46126	0.0689162	-1.17621	0.00155735	0.250642	0.664158	0.721482	0.0978348
100254571	36.315	0.96	0.41	0.223333	0.113333	0.345	1.41	0.153333	0.686667	0.73	6.69656	0.000147516	-0.246641	0.95074	1.44191	0.407027	-1.51477	0.307585	-2.88272	0.0302206
100254587	0.575	0.5	0.29	0.0666667	0	0.185	0.246667	0.13	0.08	0.376667	1.52499	0.541971	1.7751	0.460744	1.29554	0.399818	-0.193578	0.974868	-6.88526	0.00436876
100254594	2.86	4.26667	6.79667	13.06	16.37	14.325	12.9867	12.27	10.1033	14.47	-2.44833	1.69828e-09	-1.30048	0.00486337	-0.827013	0.000254636	0.469495	0.0327769	0.144443	0.777074
100254640	129.835	52.1367	24.8633	67.8067	23.4833	155.7	82.1533	35.5733	26.5533	57.9167	-0.367248	0.923736	-0.164776	0.966773	-0.487569	0.542476	1.44008	0.000468372	-1.68468	0.181532
100254652	3.005	5.43667	9.09	10.1233	11.0033	9.74	5.38667	4.92667	7.56	9.79333	-1.82851	0.00658345	0.486869	0.814384	0.918077	0.044988	0.518616	0.145028	-0.113972	0.93816
100254683	0.87	1.90333	4.43	3.41	2.32333	2.1	6.08	7.46	8.74667	6.83	-1.58183	0.536464	-1.47036	0.0683008	-0.828296	0.0649248	-1.06918	0.0031751	-1.36596	0.585045
100254716	1.915	7.71333	5.54667	11.17	8.51667	5.515	7.38	5.71333	9.32333	17.7667	-1.67345	0.0068894	0.718444	0.806475	-0.0247761	0.98755	0.356564	0.15164	-1.48244	0.2831
100254733	768.245	415.437	110.903	83.8867	45.52	220.33	151.447	203.183	164.183	93.0667	1.65489	2.15679e-05	2.01555	0.0256404	-0.850854	8.41162e-05	-0.869865	1.30022e-09	-1.2902	0.144279
100254799	146.235	45.12	17.3133	10.8767	4.44667	23.275	12.2067	13.01	36.1033	31.6133	2.57077	0.00390218	2.37993	0.0246827	0.440048	0.361367	-1.63138	3.18605e-07	-2.71594	0.0138979
100254818	1.99	0.653333	1.40333	8.84	5.13	0.68	2.27333	2.98333	2.05	7.45667	1.3037	0.727652	-1.48792	0.279935	-1.09253	0.544529	2.21581	0.00388605	-0.435714	0.859397
100254836	30.345	43.8867	28.6967	25.6933	22.86	6.475	23.3033	6.95667	45.29	55.3233	2.11343	8.72849e-06	1.34025	0.057486	2.04159	0.000775712	-0.721586	0.0298002	-1.61742	0.237948
100254856	3.905	0.0933333	0.166667	0.0666667	0.0466667	0.25	0.86	0.286667	0.176667	0.346667	3.79014	0.000138979	-2.96507	0.315243	-0.739232	0.889442	-1.26298	0.679225	-3.24322	0.126108
100254890	6.54	9.08	5.92	1.98	2.00667	3.875	4.42333	4.87667	4.91	3.01333	0.622728	0.505529	1.45775	0.00335406	0.297159	0.658482	-1.21521	8.56296e-05	-0.626111	0.212199
100254904	26.605	20.42	22.76	30.6467	24.02	26.505	34.1167	24.6967	30.0433	51.89	-0.185879	0.946345	-0.261163	0.909699	-0.10679	0.970121	0.127446	0.809756	-1.19637	5.46447e-07
100254910	0.065	0.17	0.673333	0.826667	0.466667	0.065	0.19	0.0266667	1.16	0.97	-0.248287	0.990682	0.132149	0.973999	4.5597	0.00752961	-0.383379	0.85403	-0.903865	0.752155
100254975	7.125	4.2	5.76667	8.84	7.84	10.805	8.07667	6.32333	4.17333	2.13333	-0.746489	0.3507	-0.68935	0.62283	-0.121479	0.970121	1.18265	0.000198817	1.80425	1.64278e-07
100254980	8.4	38.1267	57.62	26.1033	15.6333	53.435	46.7167	36.7967	15.79	16.1267	-2.85839	0.000165103	0.0677889	0.973999	0.663646	0.00550813	0.82337	0.024571	-0.287614	0.882515
100254983	2.705	1.27	1.52333	3.89	2.59333	0.555	1.26333	1.95333	1.37667	3.78667	2.26916	0.390571	0.518226	0.902023	-0.333374	0.893467	1.59354	0.0032982	-0.446361	0.85296
100254987	4.515	3.01333	1.06667	0.703333	2.07	3.025	2.46667	2.19667	1.29667	0.37	0.384416	0.946345	0.805048	0.651101	-1.02192	0.0131157	-0.784309	0.428036	2.42433	1.61964e-05
100255026	357.085	206.457	150.507	181.897	195.33	259.81	158.923	150.997	91.3967	62.4733	0.302093	0.773802	0.759247	0.225263	0.0232568	0.994123	1.09537	3.37159e-05	1.44291	0.0198013
100255042	65.81	204.977	242.137	248.63	224.443	282.51	261.773	255.383	225.36	165.637	-2.2647	2.38928e-05	-0.108204	0.973999	-0.0517823	0.970121	0.238643	0.0288983	0.402253	0.171096
100255065	46.885	18.03	20.2567	13.3367	20.3033	14.115	19.3633	21.7833	23.7633	9.41667	1.56017	0.00829861	0.186617	0.960578	-0.0778837	0.970121	-0.732082	0.0114739	1.17956	0.100678
100255091	174.4	84.75	150.007	179.053	155.873	165.14	98.8967	129.91	77.7467	93.2133	-0.0677368	0.964756	0.0412249	0.977027	0.23648	0.72321	1.29836	2.74571e-15	0.748319	0.0672291
100255212	0.95	3.18333	5.86	8.01333	12.4867	5.085	5.02667	6.79333	6.74667	6.94667	-2.58231	0.00230276	-0.447677	0.885278	-0.188682	0.881482	0.342866	0.402978	0.92745	0.275211
100255220	16.84	39.7167	47.4233	7.07333	9.71333	15.075	30.7933	31.24	22.59	7.42667	-0.0216082	0.993854	0.679427	0.360637	0.62385	0.88794	-1.58327	3.5192e-10	0.372634	0.697758
100255248	2.705	6.52667	5.74333	13.8067	11.9	12.72	12.99	9.47	8.13667	8.12667	-2.38121	1.4765e-06	-0.710641	0.52374	-0.704729	0.0165434	0.854055	0.0222947	0.553392	0.275938
100255251	49.335	28.8067	86.14	34.78	46.29	22.815	30.4	39.4	44.5467	39.4367	1.00048	0.403365	0.232612	0.845596	1.1542	0.00284865	-0.258748	0.499404	0.304017	0.821688
100255260	28.61	97.4367	57.74	48.7767	38.91	89.505	67.66	52.3	40.7033	40.87	-1.75781	0.000156576	0.979003	0.145582	0.165046	0.921933	0.35401	0.00856877	-0.339584	0.847704
100255269	11.66	7.36667	13.3433	20.6833	22.4367	20.27	11.4167	12.11	9.97667	8.16667	-0.918687	0.0883953	-0.335679	0.911742	0.157566	0.970121	1.13842	0.00972854	1.44349	3.52966e-06
100255284	122.6	422.593	355.56	545.497	112.853	415.22	291.38	305.753	197.85	186.74	-1.85738	0.00198652	0.96817	0.51375	0.241862	0.970121	1.55613	0.049786	-1.2755	0.575785
100255325	63.585	128.237	67.3867	41.5733	53.0167	56.01	34.9833	49.0633	195.603	297.597	0.109961	0.961297	2.33527	3.4201e-06	0.476012	0.332033	-2.13501	1.58716e-06	-2.36721	0.00707557
100255327	67.525	16.29	13.07	5.20333	8.07667	21.655	13.8967	6.49667	9.50667	4.48667	1.46826	0.0558729	0.644323	0.574025	1.03495	4.47707e-05	-0.767243	0.0338394	0.549506	0.727058
100255345	12.99	19.78	32.2	44.01	41.3633	40.39	30.7767	33.26	47.38	59.8267	-1.75818	1.47514e-05	-0.335391	0.698043	-0.0291424	0.975359	-0.00974774	0.986771	-0.473589	0.597981
100255347	8.775	9.77667	8.64333	3.42	2.45333	4.88	4.29	4.01	8.37333	6.81333	0.818725	0.826106	1.56033	0.0482314	1.12944	0.00188353	-1.20479	0.0516872	-1.73411	0.0345436
100255358	0.55	0.663333	0.446667	1.44	0.663333	0.41	0.356667	0.59	0.17	0.906667	0.323603	0.955254	1.47967	0.671014	-0.414776	0.970121	3.55887	0.00296786	-0.450316	0.847283
100255380	6.68	7.87	3.33333	10.0333	10.93	17.13	8.99	6.22333	3.65333	8.76333	-1.52962	0.136345	0.26885	0.918546	-0.877291	0.0521593	1.56505	1.4449e-14	0.155896	0.90476
100255381	42.65	22.51	15.0833	7.25	5.80333	12.745	30.4233	16.7767	18.1433	13.5333	1.61717	0.297443	-0.0502687	0.973999	-0.13678	0.970121	-1.23772	0.00752775	-1.36516	0.0232876
100255398	7.95	2.35	2.07	2.80667	0.656667	3.395	1.64667	0.366667	0.686667	1.54333	1.058	0.543855	0.940924	0.519615	2.57406	4.68388e-08	2.12745	0.0122125	-1.83901	0.459064
100255405	47.97	2773.26	2535.18	841.603	635.803	2593.66	2619.27	1784.23	1236.33	504.053	-5.82861	1.54126e-11	0.310797	0.918546	0.526591	0.437836	-0.461651	0.362431	0.157331	0.92014
100255447	11.49	13.4967	32.1867	11.0433	14.2167	19.9	9.53667	7.02	19.7867	10.1833	-0.956986	0.721223	0.832729	0.566015	2.2352	9.06283e-05	-0.736273	0.163849	0.178809	0.935836
100255463	60.065	87.5233	46.93	29.99	35.5	33.835	81.5367	66.99	75.9333	81.76	0.660143	0.640428	0.589531	0.697926	-0.504121	0.087206	-1.24482	1.83712e-05	-1.40393	0.0325475
100255480	7.45	42.72	245.127	133.08	173.157	78.46	168.423	227.587	174.093	120.87	-3.55996	4.83009e-09	-1.68486	0.00111355	0.135861	0.955353	-0.289651	0.348879	0.403289	0.599432
100255485	38.25	9.07333	0.623333	0.32	0.363333	0.98	0.876667	0.716667	2.09667	0.263333	5.29191	2.09327e-07	4.11059	0.0063383	-0.107562	0.984699	-2.80324	0.000234301	0.492149	0.862623
100255498	0.955	1.41	1.13667	1.81667	3.95333	0.955	1.47	2.84667	2.16667	2.76667	-0.127601	0.967228	0.392483	0.878722	-1.27974	0.00270669	-0.1323	0.893453	0.468958	0.570441
100255502	38.64	44.0767	47.6633	10.5767	0.746667	22.73	37.41	14.3433	6.03667	6.97	0.535802	0.875951	0.684603	0.428984	1.72352	0.000327755	0.914925	0.325501	-3.48434	0.000198436
100255533	3.775	2.87333	1.17333	0.46	0.246667	1.23	1.8	1.25667	1.58667	0.736667	1.40296	0.375361	1.1149	0.156275	-0.0914475	0.970121	-1.69965	0.00241247	-1.78697	0.0908863
100255535	15.585	13.2933	12.8167	3.89333	1.78	14.055	10.5	8.81	8.72667	3.53667	0.147389	0.987168	0.582432	0.740241	0.556943	0.494177	-1.07138	0.00737478	-0.992699	0.168513
100255573	2.99	0.99	0.986667	0.246667	0	0	0.853333	0.17	0.17	0.41	7.16773	0.00899792	0.453826	0.946794	2.55104	0.205856	0.63439	0.920413	-4.73228	0.177921
100255578	4.165	15.4533	3.28	0.06	0	0.95	2.52667	1.96	0.286667	1.04333	1.83327	0.701266	2.88147	0.00150261	0.749824	0.970121	-2.17912	0.43857	-7.45257	0.0021238
100255589	39.705	10.08	18.0167	37.22	32.9267	22.98	15.12	16.19	14.8433	18.3067	0.735226	0.751568	-0.153139	0.960578	0.157881	0.970121	1.42468	5.42508e-09	0.789217	0.0378669
100255607	17.36	18.4767	52.9133	43.14	29.62	94.4	30.6567	22.53	14.9833	25.4067	-2.49227	0.0414214	-0.406394	0.889041	1.2691	0.00571575	1.62135	2.16327e-08	-0.223364	0.935836
100255642	40.865	34.3167	16.2867	20.8667	6.33	28.735	20.7233	16.3033	3.77	4.21	0.320254	0.895741	1.08927	0.403365	0.0145499	0.999362	2.56536	7.04044e-05	0.109139	0.970776
100255664	2.33	19.1733	10.4733	13.3367	6.37	16.19	18.4667	13.65	12.2867	9.33	-2.9925	0.00036866	0.474421	0.730157	-0.361978	0.679649	0.212592	0.642333	-0.886263	0.566854
100255711	0.44	0.0833333	0.226667	42.6867	50.6233	1.155	11.3733	18.98	92.16	135.997	-1.52199	0.738567	-6.29475	0.179464	-6.35474	6.40716e-19	-1.02493	0.638333	-1.26896	0.457785
100255713	161.07	140.837	57.9467	22.72	14.7133	25.23	82.5767	15.5733	67.1833	158.4	2.65876	0.316628	1.36983	0.441542	1.8948	0.0995455	-1.48074	0.224377	-3.93842	0.00486444
100255731	2.59	19.83	54.8967	32.78	41.8233	20.28	23.23	35.24	47.87	26.96	-3.074	1.30799e-08	-0.00353393	0.99802	0.678602	0.298539	-0.44606	0.244502	0.678441	0.319071
100255742	51.025	2.11667	2.24	0.4	0.183333	11.43	1.75667	0.486667	1.04333	1.05667	2.07441	0.132445	0.578172	0.757442	2.23002	0.00154072	-1.29272	0.270879	-2.63067	0.0027867
100255747	15.11	4.17333	15.01	11.33	16.6	5.17	7.08	6.52667	6.51	6.79333	1.43206	0.13184	-0.356218	0.815275	1.21815	6.70557e-09	0.891283	0.00254925	1.07589	0.234103
100255788	33.515	67.57	38.3	21.2033	14.1767	31.775	52.4633	39.2067	45.1467	55.88	-0.0644505	0.980097	0.957658	0.573314	-0.015111	0.999362	-1.00122	0.00542938	-2.31138	0.0096862
100255800	16.065	11.92	32.2	23.1833	22.9667	17.66	17.7433	16.0467	23.4133	40.7367	-0.256266	0.93037	-0.2102	0.921088	1.0315	3.80411e-06	0.0823501	0.886448	-0.832342	0.148158
100255842	24.57	62.8633	61.5433	55.59	71.8933	110.18	100.353	77.1967	28.2033	23.4667	-2.29904	3.9398e-09	-0.375367	0.788242	-0.307408	0.779652	1.07153	0.285238	1.43138	0.0275036
100255862	5.83	3.07	1.49333	0.726667	0.16	4.755	0.933333	0.8	0.416667	0.196667	0.326074	0.957603	2.17219	0.00213456	0.920117	0.41388	0.869282	0.406091	-0.784005	0.837077
100255863	28.695	0.433333	0.0733333	0.08	0.0166667	2.38	0.71	0.0266667	0.0133333	0.0433333	3.4527	0.00238699	-0.439214	0.960578	1.3971	0.940391	2.35702	0.720663	-1.79416	0.846431
100255866	0.105	0.86	3.31	5.75333	3.79333	6.105	6.25333	5.92333	1.29333	3.65	-5.91141	1.36194e-05	-2.48093	7.53541e-05	-0.852264	0.416082	2.25169	3.37652e-05	-0.290664	0.912368
100255873	159.68	58.9333	22.5067	54.5533	55.5333	42.185	67.1933	69.98	116.92	102.157	1.66607	0.359271	0.275864	0.948562	-1.61253	0.00050971	-0.99476	0.015176	-0.757541	0.564038
100255881	16.395	2.51667	3.59667	11.2467	16.24	10.145	6.91	10.6667	5.34333	7.39667	0.474538	0.906486	-1.00568	0.353582	-1.55223	0.0024544	1.1661	0.00116591	1.1148	0.0187813
100255939	6.555	0.0366667	0.0133333	0.0233333	0.0133333	0.06	0.05	0.0333333	0.0266667	0.11	6.51486	1.54126e-11	0.0743572	0.98613	-1.32559	0.945279	-0.274955	0.967749	-2.75452	0.659559
100255943	1.265	4.08667	19.13	35.65	35.43	15.495	28.5333	65.8967	39.64	22.73	-3.82115	0.000210778	-2.34103	0.00561366	-1.72311	0.220722	-0.0563821	0.962218	0.30207	0.904476
100255952	14.07	2.15	2.13667	1.60333	1.4	1.48	4.20333	1.17667	6.01667	2.76	3.18119	0.0271066	-0.647008	0.800012	0.850752	0.664167	-1.82083	0.0074952	-0.996648	0.362699
100255955	0.745	0.536667	1.42333	2.57	4.38333	0.68	1.42667	1.30667	1.43667	0.99	-0.0695868	0.991202	-1.00655	0.446649	0.139904	0.970121	0.943502	0.0228186	2.16079	8.54934e-05
100255958	0.02	0	0.0433333	0.34	0.37	0	0.0133333	0.07	1.49	3.01667	1.25554	0.946345	-0.442872	0.973999	-0.680836	0.970121	-2.04608	0.00878254	-2.86453	0.0417584
100255977	2.575	5.53	5.25333	10.0367	10.3867	7.21	8.7	6.89667	10.4933	15.14	-1.60415	0.00747802	-0.162511	0.960578	-0.375545	0.509948	0.0295286	0.962519	-0.758769	0.365331
100255991	1.955	7.23	5.97333	1.18667	0.6	12.145	6.58333	1.37	4.86	2.07333	-2.84715	0.00885433	0.344028	0.95971	2.14757	4.63105e-05	-1.95487	0.0552348	-2.203	0.153795
100256024	42.28	82.0667	159.81	210.667	283.477	98.62	125.033	153.73	173.727	163.77	-1.34655	0.00516821	-0.243458	0.839182	0.0776706	0.970121	0.377776	0.0177838	0.721686	0.00340892
100256034	0.21	1.45667	3.84333	3.57667	8.25333	1.655	3.90667	5.15	6.86667	4.81333	-3.13529	0.00737563	-0.971764	0.485815	-0.418762	0.77948	-0.84711	0.0374616	0.837449	0.389796
100256069	0.67	3.56	14.1733	18.29	17.2733	8.89	13.5533	29.0767	19.2767	14.4933	-3.84156	0.0136283	-1.57304	0.0019397	-1.01157	0.0166631	0.0230242	0.9754	0.230538	0.721754
100256084	13.185	2.24667	3.05667	1.14667	0.733333	4.215	4.16	3.22667	4.41333	1.81333	1.54266	0.0521705	-0.561645	0.702173	-0.064792	0.973435	-1.83903	0.00158792	-1.24882	0.190468
100256130	3.815	0.283333	0.0633333	0.2	0.376667	0.445	0.31	0.236667	0.236667	1.04333	3.08617	0.00471571	0.562826	0.954234	-2.06091	0.46501	-0.0283974	0.991778	-1.56084	0.181532
100256188	0.565	0.16	0.276667	2.57667	0.25	0.05	0	0	0.0333333	0.353333	3.37774	0.641864	3.78867	0.699955	3.92813	0.604388	6.2033	0.00628213	-0.460169	0.927656
100256196	168.405	306.377	123.897	18.9667	34.7067	33.725	101.253	139.397	209.89	13.3367	2.0617	0.226141	1.87346	0.0637133	-0.140917	0.970606	-3.37235	3.04484e-47	1.58086	0.570441
100256203	4.755	1.65333	2.69333	8.36	6.07	4.615	3.78	4.11667	3.57	7.96	-0.13829	0.971673	-0.927276	0.679469	-0.59456	0.637736	1.32868	0.00202484	-0.284525	0.896953
100256209	3.485	0.67	0.486667	0.11	0.2	0.39	0.533333	0.143333	0.193333	0.23	2.97795	0.00609604	0.741193	0.674161	1.76832	0.130355	-0.715591	0.783537	-0.528003	0.875522
100256223	20.735	3.09	2.64667	1.24667	1.35	2.29	1.31	0.91	1.01667	0.46	3.09011	0.000299135	1.65933	0.0050657	1.55254	0.000975006	0.378046	0.840586	1.4267	0.0178168
100256286	14.735	10.8567	7.42333	5.16333	6.17333	10.035	12.2733	9.00667	13.3133	4.06	0.444335	0.811951	0.219434	0.889819	-0.266315	0.704384	-1.27063	2.95103e-07	0.528841	0.465597
100256290	2.935	1.48	3.35	25.5	30.8767	2.37	4.66667	11.9633	27.95	20.6533	0.179067	0.940783	-1.30297	0.150392	-1.81857	9.22824e-08	-0.0383483	0.963327	0.691193	0.58752
100256384	1.01	0.563333	0.623333	0.16	0.18	0.685	0.496667	0.64	0.75	0.41	0.440119	0.905323	0.586368	0.737924	-0.0340281	0.999362	-2.14132	0.00666434	-1.15285	0.426674
100256406	51.08	96.31	69.1767	31.5233	12.8867	126.095	112.83	75.8667	45.1033	50.8767	-1.46908	0.00700826	0.271504	0.920221	-0.120866	0.970121	-0.421619	0.392767	-2.43556	0.0455671
100256432	20.925	4.58333	3.23667	1.35	0.876667	5.545	3.35	2.89333	2.31	1.48667	1.80815	0.00509557	0.86296	0.187189	0.173985	0.95607	-0.682279	0.0977324	-0.937467	0.290848
100256457	119.735	36.7433	21.8233	12.13	2.25	36.76	8.15333	2.02	0.953333	2.72667	1.54641	0.55671	2.57582	0.0019754	3.44135	0.0163924	3.77466	0.0161163	-0.49213	0.868898
100256465	3.18	0.03	0.01	0.106667	0.04	0.03	0.0466667	0.01	0.02	0.05	6.81107	0.00253081	-0.420074	0.973999	0.0401541	0.999362	2.59569	0.420624	-0.218513	0.963238
100256474	168.75	49.3167	14.7333	7.18333	6.87667	32.61	15.8667	24.9067	28.1233	9.49333	2.27821	0.00166872	1.98569	0.000740789	-0.735048	0.028992	-1.87112	5.03119e-13	-0.382873	0.78459
100256475	19.545	17.8767	20.3	14.2	7.86667	30.575	28.5833	23.1	11.2533	3.30333	-0.788979	0.400242	-0.44702	0.838631	-0.16424	0.763517	0.431999	0.33032	1.1902	0.00171121
100256486	25.61	7.04667	11.5867	4.65667	7.05	3.86	5.2	5.01333	7.23667	6.37333	2.64795	0.00538292	0.830202	0.125174	1.22802	3.59305e-09	-0.545351	0.227312	0.150909	0.902073
100256515	50.415	0.393333	0.183333	0.0533333	0	0.63	0.34	0	0	0	6.30405	4.40851e-07	0.569987	0.921088	3.67626	0.536108	2.00552	0.880413
100256520	102.275	56.68	31.6433	12.6667	6.65	4.255	58.37	10.7933	93.4533	83.9933	4.54762	0.00761498	0.399776	0.870575	1.53974	0.411533	-2.80034	0.00878254	-3.91576	3.87309e-05
100256534	26.365	13.8667	6.74	1.12667	0.59	13.57	8.04333	3.86	2	1.82	0.783726	0.455055	1.19097	0.00727579	0.83383	0.0137146	-0.758803	0.387332	-2.1537	0.258955
100256566	1.33	0.506667	0.18	6.09333	0.256667	1.795	0.21	2.13667	0	1	-0.753081	0.946345	2.32191	0.905322	-3.64803	0.00309844	9.3246	0.104772	-2.72191	0.414423
100256573	0	0	0.0166667	0.983333	2.67333	0	0.0433333	0.726667	2.47	1.39			-1.90664	0.947236	-5.43482	0.0057184	-1.24188	0.182095	0.943435	0.262122
100256592	2.655	2.10333	4.35	5.13	5.16667	6.925	6.40333	5.38333	3.60667	4.23333	-1.54901	0.0984567	-1.27124	0.000208765	-0.288142	0.74785	0.602131	0.00281335	0.241867	0.838546
100256593	2.405	3.60667	0.73	0.396667	0.0833333	1.465	3.20333	0.816667	1.59667	0.833333	0.516275	0.845072	0.329312	0.915753	-0.199817	0.95404	-1.99491	0.000571854	-3.49144	0.000265824
100256601	5.895	1.94	1.96333	2.57667	1.85333	1.83	2.62667	1.64333	2.32	1.72	1.54896	0.00162107	-0.138592	0.963042	0.282764	0.828244	0.242276	0.74614	0.0763582	0.936743
100256619	2.97	3.56667	2.11	2.18333	1.25667	2.515	2.86	2.08	2.54667	5.02	0.121027	0.946845	0.935125	0.652543	0.021074	0.999362	-0.133166	0.914266	-2.31699	0.0071775
100256628	0.56	0.26	0.943333	12.1167	23.8333	0.475	1.91	4.87667	11.21	14.0933	0.0753037	0.993529	-2.50491	0.0171518	-2.35316	0.00200589	0.207061	0.903457	0.736958	0.115489
100256632	32.965	36.31	53.13	40.0667	60.2633	23.38	24.7267	24.7167	58.4733	86.9367	0.471677	0.931035	1.06291	0.396562	1.13479	0.00294299	-0.453498	0.155697	-0.750459	0.377618
100256641	3.99	3.08	2.54	1.55	1.12333	2.17	2.53667	1.09	1.25	1.74333	0.727606	0.651495	0.622649	0.532039	1.24919	0.000987168	0.396404	0.537426	-0.8164	0.419221
100256651	12.35	4.60667	1.14667	0.626667	0.303333	9.575	7.77333	2.37	2.78667	1.94333	0.081259	0.991202	-0.482709	0.737924	-1.03118	0.0565979	-2.02641	0.002176	-2.79693	1.61964e-05
100256653	343.625	29.6833	26.9767	16.33	3.81	47.155	30.2233	10.2767	5.52667	5.01333	2.79233	0.216085	0.268815	0.93579	1.42766	8.31883e-05	1.64342	0.0514903	-0.687097	0.677745
100256656	136.725	47.23	31.6967	5.63333	2.12667	22.15	36.7367	7.04667	16.5533	18.23	2.55959	0.226856	0.804181	0.52374	2.19493	1.03136e-12	-1.47969	0.256106	-3.16509	0.00496922
100256684	130.245	57.9733	26.98	10.8567	6.31667	42.55	16.1567	15.5133	9.34	7.86	1.4896	0.116239	2.40232	0.00875944	0.821476	0.292473	0.31767	0.672376	-0.671723	0.726102
100256698	0.97	2.76667	2.22667	1.63	1	4.48	3.51667	1.58	1.54667	1.14	-2.34062	0.000926149	0.0627493	0.973999	0.510146	0.539548	0.175954	0.869053	-0.517412	0.816289
100256700	58.495	4.04	3.21667	1.21	1.61	8.35	5.44	3.58667	2.64667	0.556667	2.71465	0.00313131	0.00344516	0.998254	-0.152014	0.970121	-1.09245	0.43296	1.54412	0.3144
100256715	57.705	5.99	4.21	2.11333	2.17	4.055	1.60333	4.97667	5.21667	1.50333	3.70474	1.75834e-13	2.1177	0.245821	-0.165236	0.996546	-1.17683	0.622265	0.712547	0.872911
100256719	1.015	2.34333	4.02333	10.6	10.24	3.31	3.75333	4.64667	3.8	7.84667	-1.82167	0.16386	-0.300192	0.863475	-0.186614	0.911226	1.5746	2.59356e-06	0.355622	0.524663
100256746	25.55	7.71	7.86333	4.14	4.87	9.425	5.90333	3.77667	4.25	2.85667	1.39077	0.281271	0.694316	0.452693	1.04939	0.00027233	0.0835919	0.940001	0.622988	0.445688
100256762	14.785	8.50333	10.09	16.6767	12.3367	6.14	8.27	4.29333	3.83	7.22333	1.09805	0.502441	0.282099	0.946184	1.23003	0.163258	2.22741	3.96316e-09	0.90035	0.645391
100256774	0.48	0.716667	0.666667	0.64	0.28	0.645	0.77	0.793333	1.13667	1.01	-0.626448	0.837975	0.294637	0.883888	-0.211074	0.970121	-0.736038	0.135334	-1.90667	0.00034921
100256776	7.05	2.24333	1.63667	1.23667	0.5	1.5	0.803333	0.73	1.59	2.13	2.05716	0.0744847	2.0184	0.0599233	1.18211	0.04894	-0.271127	0.762142	-2.09499	0.000138196
100256780	19.285	29.1767	19.59	6.19	5.47667	15.825	14.4867	7.44667	13.6033	9.52	0.166346	0.933009	1.40005	0.000803167	1.4086	6.77581e-07	-1.0406	3.54322e-06	-1.04585	0.278748
100256792	104.455	99.2067	56.01	44.9667	21.6633	54.915	64.1	33.8933	49.5667	85.6333	0.744399	0.47063	1.00719	0.237063	0.729657	0.239834	-0.0364248	0.97634	-2.06903	0.000162298
100256795	0.285	0	0.526667	25.6633	3.06667	0.045	0	7.56333	0.47	1.36667	2.32403	0.865972			-3.84185	0.00077219	5.9071	0.367708	1.26363	0.852312
100256818	2.27	58.6667	99.8933	70.4333	46.2733	66.54	95.35	108.62	49.3533	48.7433	-5.00192	4.2939e-18	-0.307006	0.81493	-0.0977353	0.970121	0.61135	0.0132974	-0.47352	0.836881
100256846	270.055	4.02	0.9	0.236667	0.186667	2.78	0.613333	0.553333	1.09333	0.51	6.4704	5.22935e-07	3.2237	0.0133005	0.714421	0.498846	-2.13811	0.00172312	-1.57948	0.0685625
100256849	39.965	38.8967	13.6333	1.76667	0.52	16.655	23.37	7.51	6.66	9.66	1.13957	0.586987	1.28312	0.237397	0.8995	0.281504	-1.82853	0.00585915	-4.72555	0.000122582
100256854	36.805	15.75	17.43	18.1833	21.4633	28.72	20.91	18.97	19.2767	9.33333	0.227618	0.856823	-0.139794	0.960578	-0.0968849	0.970121	0.0103704	0.986771	1.21719	0.00465385
100256859	3.955	1.05333	1.20667	0.733333	0.33	1.825	1.21	0.386667	3.86333	2.36	0.946568	0.534936	0.137922	0.972574	1.64157	0.231058	-2.2994	0.000340977	-2.76413	0.0164637
100256873	35.665	8.4	3.68667	1.54333	0.536667	7.385	5.39333	2.74333	1.69667	1.13667	2.11992	7.78417e-07	1.08882	0.290404	0.460965	0.438069	-0.0493077	0.97393	-1.64121	0.483576
100256919	8.58	5.19667	5.73333	3.18667	1.56667	5.185	5.46	4.71333	4.91	3.49333	0.603104	0.497566	0.323252	0.765163	0.298369	0.585309	-0.52722	0.0883959	-1.22421	0.00213088
100256937	5.945	1.02667	1.76333	1.27	2.48	3.075	1.47333	1.42667	0.723333	0.776667	0.817069	0.483685	-0.176074	0.946944	0.32799	0.764271	0.897732	0.24041	1.56883	0.00202479
100256970	617.7	30.8267	16.2033	4.01333	1.98333	67.305	15.4767	5.61333	4.4	5.98333	3.05923	0.00468479	1.42448	0.0436682	1.54251	0.573102	-0.0483579	0.9754	-1.99358	0.225778
100257005	174.03	71.1267	17.19	14.4433	9.67	111.11	93.8367	87.68	32.3667	33.9033	0.409968	0.940134	0.0269195	0.981474	-2.34404	3.43852e-07	-1.07759	0.0482075	-2.15622	0.0908863
100257013	15.055	11.9833	8.30333	4.45333	1.73333	13.18	11.79	9.41333	8.38	5.74333	0.017375	0.993854	0.365631	0.509916	-0.167606	0.853064	-0.815369	0.000214987	-1.67289	0.00252985
100257029	5.07	3.87667	1.52	1.42667	1.45667	1.34	1.95	1.34	2.59	2.5	1.77785	0.00184516	1.71092	0.393491	0.191156	0.921295	-0.760271	0.0488041	-0.915702	0.263577
100257033	4.23	2.33	2.46333	3.38333	1.31	2.65	1.11	1.24	1.73	2.09	0.606256	0.865223	1.6649	0.170718	1.00057	0.0274445	1.06348	0.00188247	-0.870139	0.378432
100257041	1.94	0.306667	0.25	0.86	0.403333	0.715	0.363333	0.166667	0.11	0.38	1.38735	0.672202	0.248391	0.968818	0.62012	0.968042	3.07523	0.00432868	-0.158611	0.947518
100257053	46.415	20.01	15.51	6.92	7.77	11.44	18.0767	14.07	16.6767	12.62	1.90258	0.0233621	0.597127	0.64629	0.157126	0.872799	-1.1743	2.38387e-05	-0.937759	0.340851
100257057	10.66	3.41667	10.24	16.9733	12.16	9.97	12.0833	9.07	15.26	16.3233	-0.0251707	0.993227	-1.55007	0.00663216	0.199853	0.856779	0.25508	0.67917	-0.679942	0.554005
100257094	7.305	35.68	33.2433	17.37	11.24	18.075	24.7667	30.58	24.1467	19.4533	-1.46175	0.00430118	1.1827	0.538797	0.147757	0.921908	-0.381277	0.33669	-1.21733	0.436835
100257125	4.095	5.87667	9.48667	11.1367	6.21667	11.145	8.04	8.25667	5.22667	3.75667	-1.51988	0.135931	-0.1373	0.960578	0.228597	0.819795	1.18376	2.08881e-07	0.402941	0.842634
100257144	18.05	11.9667	16.2333	5.46667	7.46333	21.06	15.8033	10.1833	7.72	1.96667	-0.366626	0.824231	-0.136725	0.973999	0.718193	0.462544	-0.401683	0.425558	1.8145	0.00316212
100257151	57.575	48.9067	46.7067	19.7267	19.38	32.605	42.69	22.4067	45.9667	26.44	0.661005	0.45136	0.447999	0.77851	1.06841	0.0194139	-1.12398	1.04927e-15	-0.465959	0.712926
100257213	42.585	24.0967	20.52	8.79333	5.26333	23.87	15.4233	11.4733	14.3333	11.3767	0.723967	0.349159	0.961611	0.06131	0.862988	0.0051132	-0.606862	0.0446454	-1.2088	0.000288557
100257229	0.175	0.323333	2.81667	5.61333	8.73667	0	0.19	0.94	1.44	4.64667	4.21631	0.807408	1.52033	0.797791	1.60607	0.318375	2.06435	7.70448e-05	0.928741	0.270195
100257234	6.415	6.98333	11.96	5.49333	4.33	12.93	4.07	8.52667	5.73	6.18667	-1.14986	0.508358	1.14799	0.00323149	0.499069	0.720526	0.0346185	0.97945	-0.492938	0.676832
100257253	1104.68	375.177	365.147	216.087	206.013	879.06	403.153	297.697	165.077	79.7733	0.23773	0.927747	0.10213	0.973999	0.318318	0.726912	0.486387	0.1595	1.23898	0.00188403
100257332	166.275	79.4133	60.2633	29.85	21.5233	67.315	121.237	56.36	69.85	47.15	1.12768	0.380363	-0.283573	0.784256	0.113264	0.915722	-1.1347	9.88026e-06	-1.2695	0.00460432
100257333	6.005	0.18	0.0433333	0.133333	0.0633333	0.275	0.213333	0.1	0.113333	0.0466667	4.26356	0.00320115	0.118156	0.973999	-1.0979	0.853875	0.324322	0.933956	0.516601	0.929955
100257373	14.48	28.02	9.63	9.47333	12.2433	13.335	12.79	9.62667	16.0833	22.26	-0.104322	0.973365	1.59951	0.00516175	0.0243768	0.999362	-0.674225	0.114975	-1.13348	0.221466
100257397	63.9	22.6033	7.51	3.54667	1.92	14.64	10.9433	11.0567	8.55333	2.73667	1.96541	0.000100306	1.42307	0.153118	-0.580943	0.165339	-1.14948	0.0237493	-0.544783	0.58635
100257428	60.355	91.83	81.5567	36.56	54.1767	33.145	75.99	59.6733	92.4167	91.19	0.792276	0.718577	0.693314	0.50552	0.463015	0.220611	-1.25045	0.000831595	-0.765944	0.0144327
100257429	13.11	108.55	98.8767	112.713	128.31	68.74	83.6567	128.31	132.31	182.43	-2.49911	0.000200502	0.949786	0.500146	-0.326882	0.512465	-0.130718	0.753737	-0.688772	0.356103
100257444	53.61	3.52	2.19333	2.8	1.34	15.815	1.84667	0.733333	0.646667	2.44333	1.64639	0.279871	1.27811	0.06131	1.60551	0.0472618	2.21014	1.00961e-05	-0.769991	0.615219
100257469	64.425	86.9433	93.1133	14.45	6.31667	67.085	43.48	45.16	27.4133	6.93	-0.107537	0.974419	1.31215	0.00385447	1.07218	0.000261587	-0.816467	0.160308	-0.271799	0.854086
100257506	7.655	5.50667	27.3633	23.15	10.3433	4.64	10.2333	28.0367	10.72	10.38	0.578911	0.542619	-0.308372	0.960578	-0.0243835	0.999362	1.19884	0.00675941	0.0214186	0.988158
100257507	32.14	44.82	83.1067	88.7167	96.83	73.755	77.3633	83.78	85.2767	102.773	-1.3304	0.00211446	-0.434059	0.348035	0.0124345	0.999362	0.158829	0.574249	-0.278948	0.817754
100257534	2.395	2.68	8.30333	2.09667	0.456667	1.62	2.61	8.45	6.50667	5.87667	0.359982	0.935455	0.465875	0.834527	-0.0221008	0.999362	-1.52652	0.00642659	-3.73339	3.98938e-16
100257557	0	0	0.1	1.33667	0.913333	0.055	0.04	0.05	0.0866667	0.273333	-3.11129	0.892153	-1.92722	0.946944	1.08717	0.970121	4.01646	0.000860848	1.85048	0.298723
100257561	15.505	14.6433	14.84	12.09	16.9733	25.645	14.8033	15.4	6.74667	3.31333	-0.760425	0.861961	0.20316	0.960578	-0.0226764	0.999362	0.940453	0.0182585	2.29766	5.46382e-19
100257576	8.175	2.4	2.28	6.22333	7.84667	4.03	5.27667	2.69	2.92	5.21333	0.859061	0.63731	-0.709077	0.741502	-0.234654	0.866768	1.17831	5.54238e-05	0.317783	0.8585
100257595	8.425	0.706667	1.69333	5.23	5.71333	1.855	0.996667	1.3	2.25	6.20333	2.06398	0.175964	0.0528275	0.981624	0.395566	0.916929	1.31553	0.000145322	-0.318462	0.844341
100257616	23.1	15.8933	12.2967	2.12667	1.41333	10.725	8.01667	3.61667	3.93	1.89	0.991567	0.103277	1.24525	0.0738095	1.78339	0.000350351	-0.791614	0.133722	-0.682406	0.600053
100257630	2.54	0.773333	0.533333	0.453333	0.51	0.335	0.246667	0.16	0.253333	0.153333	2.87611	0.0174735	1.98968	0.00899533	1.7566	0.231868	0.939957	0.317779	1.69793	0.0749428
100257648	94.365	11.8867	9.44333	3.27	1.88	13.385	5.52	3.07667	2	0.633333	2.67189	2.21888e-05	1.39278	0.0689162	1.6365	0.00184882	0.807954	0.265326	1.56074	0.105813
100257658	79.755	205.9	311.683	254.673	184.357	216.47	297.68	363.247	273.257	214.037	-1.61095	0.00286994	-0.166926	0.920227	-0.207351	0.695316	-0.00501465	0.989935	-0.431343	0.695927
100257672	0	0.12	0.286667	1.50333	1.69667	0.035	0.14	0.37	0.396667	0.223333	-1.57385	0.946345	0.0394798	0.993298	-0.39729	0.970121	2.01846	0.0236482	2.88508	0.00955942
100257716	13.195	29.1533	49.2633	40.9167	42.0867	16.56	42.5167	56.9867	96.01	66.01	-0.47908	0.800238	0.0684265	0.975425	-0.201071	0.84432	-1.13367	7.90097e-10	-0.76658	0.0797635
100257736	22.67	60.16	3.53333	2.87	1.40667	9.26	6.89	12.6267	10.6533	4.69	1.21205	0.326946	3.80953	0.0019397	-1.82835	1.60542e-07	-1.80142	4.51407e-11	-1.76634	9.40305e-06
100257740	29.845	3.99333	3.92	1.85	1.11667	7.32	4.59	3.46333	2.64667	0.873333	1.91019	0.000161055	0.0530189	0.975384	0.197411	0.848121	-0.42137	0.502552	0.0968824	0.957979
100257743	4.57	1.73667	1.04	0.583333	0.0133333	1.02	3.05667	1.40333	2.84	3.24333	1.97398	0.314553	-0.304935	0.952218	-0.408693	0.937397	-2.19276	0.127005	-8.34723	1.14879e-05
100257750	8.41	4.22333	6.14	21.01	23.3667	5.045	10.2367	20.3767	23.9	29.2367	0.670481	0.905052	-0.86662	0.197621	-1.71028	0.00155735	-0.0931757	0.940001	-0.437288	0.516526
100257784	7.25	4.89333	2.83	2.51333	0.333333	7.43	3.99333	2.77333	1.16333	7.29667	-0.229661	0.957985	0.895822	0.691228	0.0768079	0.989394	1.20461	0.75843	-5.1257	0.00552674
100257803	33.955	72.01	100.283	144.753	159.7	103.915	125.06	134.987	106.357	95.15	-1.74427	2.2132e-05	-0.470613	0.337816	-0.413387	0.329196	0.539144	7.66278e-05	0.734602	0.00650591
100257805	2.055	1.07333	0.713333	0.25	1.24667	2.68	1.58333	0.71	0.533333	0.136667	-0.559476	0.78331	-0.243354	0.957847	0.0431779	0.997391	-1.00357	0.448311	3.20733	0.00213704
100257810	14.865	0.44	0.96	0.693333	0.73	1.685	1.51	0.506667	0.18	0.253333	3.02581	0.00339026	-1.45648	0.379045	0.9601	0.407027	2.02747	0.12668	1.18485	0.51446
100257828	15.485	2.53	2.62333	0.776667	0.74	2.06	2.27	1.10333	0.576667	0.183333	2.72837	0.00165981	0.503784	0.872388	1.28413	0.329196	0.528779	0.915711	1.95354	0.48725
100257846	12.845	26.7033	14.2633	8.81333	7.08667	35.075	23.7467	10.9967	4.28333	3.50667	-1.5635	0.017569	0.470752	0.50552	0.391281	0.673319	1.14149	0.00674404	0.785269	0.464545
100257867	9.83	1.67333	0.1	0.0133333	0.00666667	1.405	0.326667	0	0.04	0.00666667	2.61547	0.0286835	2.75673	0.000117424	4.81267	0.143862	-1.43869	0.855608	-0.064441	0.994757
100257868	0.32	0.44	0.406667	0.583333	0.323333	0.43	0.436667	0.496667	0.72	0.873333	-0.582038	0.844774	0.490182	0.846488	-0.280467	0.912929	-0.20595	0.817578	-1.54692	0.00650591
100257888	20.94	7.31333	10.4233	21.1267	26.6667	12.68	10.0333	8.63	9.88667	12.55	0.556323	0.696963	-0.148362	0.960578	0.311581	0.72621	1.1838	2.27911e-06	1.02413	8.27797e-05
100257903	3.94	0.0566667	0.05	0.7	0.0333333	0.74	0.426667	0	1.14667	1.24667	2.46634	0.920408	-2.28516	0.800375	2.48382	0.881482	-0.625378	0.838591	-5.13978	0.00533918
100257908	2.375	0.266667	0.27	0.16	0.0433333	0.455	0.26	0.16	0.27	0.203333	2.24006	0.00650164	0.240084	0.966756	0.749061	0.845933	-0.70187	0.60013	-2.14363	0.269535
100257925	36.14	40.6967	23.6067	28.6933	14.06	94.52	56.04	41.5667	14.6933	28.0133	-1.64806	0.449393	0.0956175	0.973999	-0.802017	0.0101078	1.03595	0.00527944	-1.36626	0.262663
100257932	62.77	201.59	92.32	6.35	14.58	46.415	105.413	133.977	103.52	3.81333	0.164242	0.966757	1.17841	0.538797	-0.510103	0.92531	-3.93033	1.86676e-48	2.05809	0.0893685
100257952	6.03	3.94333	2.89333	1.01	0.733333	3.6	3.14333	2.64333	3.01333	2.05333	0.623977	0.595698	0.772301	0.444515	0.14872	0.965217	-1.48021	0.000631946	-1.59889	0.0296989
100258031	0.745	0.316667	1.19	4.71	4.41	1.1	1.91333	1.82333	3.77	3.56667	-0.667798	0.751116	-2.23452	5.56771e-06	-0.61806	0.705572	0.418052	0.246898	0.33282	0.708638
100258060	2.865	0.583333	0.363333	0.04	0.1	0.31	0.533333	0.18	0.566667	0.163333	3.01954	0.031379	0.421257	0.921088	1.01407	0.668301	-3.7608	0.00335493	-0.64694	0.897546
100258085	28.21	0.1	0.07	0	0.01	0.72	0.18	0	0.0233333	0.01	5.06491	1.00902e-08	-0.690635	0.918268	3.44836	0.743892	-1.70401	0.903457	-0.064441	0.994757
100258104	2.595	1.02333	0.966667	1.84333	3.95667	3.15	2.09333	1.27333	1.18333	1.50333	-0.419977	0.727652	-0.547405	0.792326	-0.381248	0.810561	0.73137	0.160083	1.3655	0.00459195
100258106	151.995	599.257	680.28	686.353	454.48	50.17	250.5	415.677	279.627	439.45	1.37729	0.374034	1.74345	0.237712	0.714029	0.805857	1.39583	7.44663e-12	-0.0818455	0.949334
100258114	14.8	6.59333	6.07333	9.84	7.21333	13.575	10.0433	7.91667	4.44333	7.37333	-0.0873357	0.976719	-0.231747	0.899306	-0.364765	0.537889	1.23837	0.000117277	-0.367958	0.867932
100258141	149.635	35.1133	36.9033	40.3867	42.2767	37.77	32.5467	35.14	42.5067	35.7767	1.87415	2.25001e-05	0.523213	0.496831	0.0888918	0.940407	0.0236542	0.950146	0.15748	0.817796
100258158	32.1	43.0167	64.32	103.57	214.583	73.73	80.3333	94.56	119.12	113.537	-1.31896	0.00276025	-0.628496	0.582609	-0.533062	0.00713241	-0.107835	0.84943	0.788753	0.0690772
100258180	0.915	0.47	0.1	0.603333	0.366667	0.875	0.486667	2.82333	0.78	3.22333	-0.202365	0.979958	0.641047	0.95028	-4.81308	0.00721554	-0.262548	0.940001	-3.03718	0.0138003
100258183	2.725	2.46667	3.46667	8.53	4.96	12.175	7.68333	6.01	4.53667	4.94333	-2.33274	0.0166929	-1.30806	0.0204464	-0.778207	0.0578655	1.0103	0.0077587	-0.247854	0.903309
100258232	2.29	3.48333	1.98	0.98	0.643333	2.405	1.45	0.97	0.636667	1.22	-0.19488	0.946345	1.88949	0.209395	1.04931	0.00760441	0.719606	0.20247	-1.40645	0.488124
100258257	0.91	0.553333	0.396667	0.08	0	0.03	1.31333	0.1	1.55667	1.05	4.86426	0.293284	-1.09248	0.722296	1.98073	0.634852	-4.15893	0.000900975	-6.63182	0.00947372
100258264	66.615	29.1167	17.2	16.5167	4.01333	19.255	27.4767	12.04	12.32	37.86	1.75622	0.658355	0.693523	0.785467	0.533338	0.802722	0.513205	0.883923	-3.50108	0.00261935
100258273	16.75	47.74	46.2467	38.4267	22.5667	43.355	50.92	57.93	55.6967	41.0067	-1.4986	0.00190556	0.209864	0.874023	-0.306829	0.537889	-0.438225	0.000820615	-0.974754	0.00615848
100258320	10.105	26.1167	26.95	34.0833	49.6467	27.01	30.2	23.9133	30.4933	42.35	-1.55716	0.000188766	0.274201	0.908457	0.196114	0.666505	0.252981	0.130564	-0.0502297	0.977817
100258356	6.855	3.01333	1.36333	0.32	0.613333	0.66	1.00333	1.01	1.64333	0.81	3.25692	6.10784e-13	1.9333	0.000328878	0.445466	0.881482	-2.28487	0.00104396	-0.46134	0.555319
100258363	11.725	10.6767	17.43	31.0633	26.98	31.73	24.1467	24.0933	14.9967	21.6767	-1.60742	0.0359618	-0.798126	0.246596	-0.440733	0.213439	1.14361	1.54899e-08	0.194004	0.841502
100258380	3.62	0.95	0.476667	0.193333	0	0.235	0.636667	0.146667	0.176667	0.02	3.88359	0.0032773	0.883337	0.816877	1.70658	0.587738	0.216048	0.972437	-2.1015	0.884086
100258391	4.105	1.4	1.69667	4.50667	3.75	1.17	1.44667	1.04667	1.55	2.58	1.80379	0.466657	0.372679	0.949727	0.700618	0.765374	1.66053	0.00068426	0.372071	0.815824
100258410	11.41	33.03	5.03667	0.496667	0.15	10.13	5.58667	0.62	0.153333	0.116667	-0.0603186	0.991202	2.87538	5.51214e-07	3.0255	0.00451035	1.77673	0.380717	0.349785	0.935836
100258414	0.18	0	0	0	0.03	0	3.98	0	0	0	3.17458	0.888549	-21.5428	1.7862e-05					0.897332	0.935836
100258425	12.53	95.8367	83.3133	41.0533	25.5267	108.735	80.6567	63.07	94.6867	104.77	-3.22234	4.92275e-07	0.550519	0.388827	0.42412	0.769376	-1.11122	1.93173e-10	-2.06567	3.98938e-16
100258445	1604.67	3359.82	2834.62	1728.73	735.847	4284.6	3761.27	2770.68	1635.87	1451.16	-1.53075	0.00382786	0.345261	0.883888	0.0458374	0.982862	0.177145	0.812867	-1.45125	0.378388
100258466	0	0.00666667	0.0466667	0.02	0.00666667	0	0.0133333	0.04	0.26	0.42			-0.381608	0.973999	0.201666	0.987199	-3.75988	0.0113325	-5.96089	0.00228929
100258486	17.93	0.663333	0.186667	0.196667	0.0566667	2.43	1.68333	0.08	0	0.16	2.74514	1.70095e-06	-1.04152	0.62892	1.27182	0.895336	3.80298	0.540748	-1.9272	0.732925
100258492	8.885	2.51333	1.58667	0.333333	0.126667	0.94	0.676667	0.71	0.79	0.18	3.11089	0.00441516	2.31969	0.000112287	1.1923	0.468098	-1.19031	0.242079	-0.956419	0.772062
100258504	1.57	0.01	0.0233333	0.0366667	0.00666667	0.025	0.00666667	0	0.0233333	0.0266667	5.83654	6.99078e-06	0.348369	0.973999	3.20764	0.693978	0.735074	0.903457	-1.44452	0.817754
100258524	35.785	205.827	358.107	359.603	355.943	224.295	268.487	326.197	246.587	203.71	-2.75285	9.50348e-06	-0.109446	0.965252	0.154118	0.78598	0.63749	1.58977e-05	0.806997	0.0619028
100258526	0.94	1.66667	4.69667	10.2467	14.3	3.89	4.64667	5.87	6.04667	9.97	-2.20399	0.000189762	-1.15567	0.00178537	-0.307044	0.537373	0.854616	0.00172365	0.622541	0.628761
100258555	120.44	54.9733	19.58	9.37667	12.4	58.135	41.4033	32.04	21.79	16.89	0.872843	0.313167	0.715026	0.699293	-0.668546	0.632213	-1.11632	0.00805531	-0.462427	0.427437
100258559	18.02	2.67	2.28	0.306667	0.08	1.58	1.73333	1.66667	0.976667	0.606667	3.30012	0.00267336	1.04514	0.317441	0.448855	0.820327	-1.569	0.0960511	-2.74969	0.042754
100258609	2.67	0.63	0.203333	0.08	0.02	0.285	0.186667	0.136667	0.123333	0.08	3.06284	0.0086301	2.18814	0.0474076	0.495025	0.930569	-0.561598	0.858137	-2.09139	0.505708
100258629	1.55	0	0	0	0.0166667	0	0.0266667	0	0	0.0133333	7.4014	0.0087866	-1.32388	0.960578					-0.064441	0.994757
100258655	22.505	19.8267	56.7	16.6933	12.3467	79.895	34.5367	17.9	8.79	12.5333	-2.00334	0.000419518	-0.5115	0.87375	1.71311	0.00433183	1.02593	0.56527	-0.643479	0.879776
100258663	38.17	38.8033	117.917	71.89	35.4533	114.675	96.3167	129.993	81.1933	21.56	-1.72978	5.9679e-07	-1.0268	0.102254	-0.105035	0.970121	-0.0755062	0.919847	0.607718	0.259928
100258690	13.475	8.96	6.06333	16.2833	13.7733	15.925	9.82333	8.35	7.73333	19.1867	-0.405464	0.756086	0.435659	0.885278	-0.438098	0.342571	1.16709	1.48777e-08	-0.713098	0.457004
100258692	3.415	104.443	140.33	190.477	221.363	64.96	102.307	128.73	123.873	105.773	-4.42507	1.58275e-09	0.489683	0.763548	0.15401	0.94349	0.719557	1.16449e-05	0.748911	0.57886
100258695	0.255	1.49667	0.396667	0.176667	0.0433333	19.155	3.56333	0.526667	0.0466667	0.17	-6.48076	1.0249e-08	-0.577985	0.921088	-0.378492	0.970121	1.95752	0.345839	-2.60003	0.570441
100258696	111.25	279.127	197.717	115.51	41.1967	288.09	125.95	161.273	59.2	56.24	-1.38829	0.573926	1.48732	0.000638604	0.324248	0.719331	1.0567	0.00515119	-0.860171	0.625806
100258702	9.98	37.1067	17.82	20.8633	15.0367	40.56	36.5167	29.27	12.45	11.0167	-2.15373	7.63337e-10	0.423374	0.733967	-0.685778	0.188148	0.839047	0.00469478	0.256286	0.844628
100258721	31.06	32.4467	24.6	18.01	10.0433	32.195	29.4767	9.07333	16.2833	32.7933	-0.0697387	0.991202	0.630937	0.745603	1.44458	0.000440416	0.238139	0.84556	-2.11673	0.130445
100258732	8.11	2.57	2.5	0.32	0.366667	2.335	3.29667	1.20333	2.97333	1.81333	1.67196	0.630624	0.0462885	0.976804	1.06547	0.332185	-3.12394	0.00253545	-2.52079	0.100259
100258759	11.965	8.26333	19.43	41.24	41.9167	16.935	26.4567	39.93	22.46	13.8067	-0.62305	0.554036	-1.33975	0.0158284	-1.03393	0.0121686	0.972522	6.0122e-05	1.65488	0.00323883
100258760	33.845	0.203333	0.296667	0.3	0.173333	0.265	0.04	0.04	0.0766667	0.116667	6.77901	1.98754e-05	3.0487	0.450648	3.00946	0.349956	2.10354	0.417121	0.515695	0.897384
100258771	12.225	2.93333	4.82667	3.44	5.62	15.33	13.83	7.53	3.08	6.27	-0.541444	0.854937	-1.85259	0.00639297	-0.616373	0.292518	0.2609	0.796893	-0.412721	0.825328
100258773	92.57	13.2267	2.38	1.08667	0.303333	5.05	12.7733	4.25333	10.56	3.24	4.07206	0.0165472	0.386203	0.79713	-0.894525	0.74961	-3.25461	1.76014e-05	-3.42929	0.000815631
100258792	10.135	164.883	52.32	28.8133	5.54667	21.735	48.5167	24.55	46.5133	11.3667	-1.28588	0.445261	2.28171	0.00116569	1.10824	0.0976781	-0.589699	0.24899	-1.22638	0.0880099
100258799	25.66	3.51333	0.886667	0.813333	0.303333	1.62	1.40333	0.65	1.02333	0.69	3.84636	0.00737563	1.56374	0.277928	0.469899	0.937397	-0.239653	0.915723	-1.20807	0.42484
100258822	124.045	209.243	214.61	242.283	324.283	281.71	275.837	274.533	292.557	408.683	-1.30366	0.000935529	0.0842448	0.973999	-0.333198	0.238275	-0.177561	0.311479	-0.640902	0.638306
100258838	0.715	3.54	7.68333	13.3733	5.45	10.94	9.75667	11.3167	12.9167	4.42667	-4.04104	2.35613e-06	-1.11231	0.199763	-0.524589	0.629321	0.152785	0.892978	0.260474	0.779227
100258861	23.125	21.34	8.29333	3.52667	2.16	4.275	6.71667	4.18667	5.8	12.72	2.28905	0.00123813	2.00584	0.000349421	0.985573	0.434999	-0.616108	0.2988	-2.51772	3.17564e-05
100258862	58.475	6.60667	3.30667	0.853333	0.643333	6.64	6.30667	2.54	2.56667	1.22667	2.93904	0.0102416	0.384609	0.84812	0.403311	0.970121	-1.49341	0.00384999	-1.07436	0.388033
100258873	24.925	155.457	138.08	16.7467	17.22	50.98	85.6533	84.88	86.38	14.5967	-1.14476	0.113237	1.1919	0.170872	0.726662	0.43541	-2.26743	0.00324248	-0.135328	0.946917
100258874	45.265	11.3367	10.9833	9.83	2.91	7.83	13.8033	5.97667	14.0033	19.5333	2.53797	0.353519	0.122023	0.973999	0.876072	0.269364	-0.424675	0.902061	-2.87157	0.00810585
100258895	233.11	392.72	435.697	303.68	257.963	321.59	471.007	407.967	225.843	113.033	-0.640514	0.584014	0.0109279	0.993351	0.118409	0.921367	0.534387	0.0268865	1.22858	0.00346759
100258920	1.28	0.706667	0.81	7.91333	7.19667	2.975	2.36667	1.4	2.49667	7.59333	-1.36905	0.556498	-1.40763	0.325637	-0.770586	0.724032	1.76552	1.86772e-05	-0.114202	0.921369
100258946	34.27	6.15	4.57333	4.82333	8.36333	2.365	3.24333	8.53	12.05	0.983333	3.59863	0.155746	1.37524	0.626803	-0.833771	0.897325	-1.29257	0.485292	2.99694	2.33263e-05
100258966	103.935	23.82	21.99	7.36	5.89	28.895	14.0233	7.13333	12.23	7.34	1.7489	0.00737563	1.04209	0.220345	1.63501	3.58718e-06	-0.63511	0.0905263	-0.329561	0.571624
100258992	6.725	10.26	36.5967	42.4367	23.9133	18.405	12.6967	25.22	18	20.7967	-1.46469	0.788587	-0.103876	0.973999	0.563355	0.166075	1.33436	0.00453551	0.351813	0.895512
100259000	62.24	43.0567	5.56333	11.58	6.79667	92.09	57.7567	22.1233	22.6067	42.88	-0.797385	0.739627	0.264263	0.960578	-1.98718	4.37087e-05	-0.88242	0.227536	-2.72541	8.49555e-07
100259041	261.855	278.937	117.74	69.6467	47.52	28.115	148.42	28.5167	226.5	413.593	3.18299	0.10378	1.4874	0.311247	2.04923	0.00019723	-1.61185	0.031305	-3.54838	0.00591329
100259050	0.89	0.866667	0.42	0.556667	0.223333	0.76	0.456667	0.35	0.743333	2.94667	-0.0283144	0.995442	1.55948	0.429594	0.274364	0.953901	-0.329467	0.714841	-3.62247	1.56229e-05
100259060	14.86	0.823333	0.39	0.1	0.04	0.92	0.51	0.113333	0.0666667	0.246667	3.85328	0.000178098	1.14519	0.741502	1.81515	0.365666	0.639739	0.935203	-3.18281	0.251667
100259070	10.83	11.2567	4.85667	9.29667	8.35	17.12	6.85	5.19	3.78333	11.6967	-0.805429	0.476474	1.35472	0.449225	-0.0808107	0.977087	1.39015	7.87356e-05	-0.958015	0.645
100259078	206.835	107.203	47.82	90.9767	184.823	278.455	187.307	145.87	93.9467	48.6633	-0.546212	0.536938	-0.490178	0.855068	-1.58328	5.85181e-14	0.0424369	0.962804	1.86584	4.19891e-15
100259085	57.76	6.61667	4.35	2.03	1.16667	19	6.33667	3.20333	3.36667	8.71	1.53207	0.152296	0.43011	0.880659	0.446502	0.822518	-0.635787	0.303223	-2.80868	0.00012144
100259092	25.93	24.1033	35.4367	20.0033	14.7867	28.43	30.87	32.7333	34.2233	34.5933	-0.369131	0.937501	0.143314	0.972574	0.126728	0.970121	-0.666776	0.130833	-1.3414	0.00123864
100259127	1.145	3.24667	3.11	1.29333	0.07	2.195	3.21667	2.07667	1.18	0.49	-1.09377	0.221012	0.324952	0.883342	0.586305	0.686499	0.228692	0.865359	-2.99045	0.00473948
100259145	121.495	34.2567	33.9033	5.73667	0.82	19.395	5.32667	1.26667	3.27333	0.866667	2.6665	0.341889	3.07542	0.128994	4.76175	0.00501425	0.896253	0.554378	-0.476756	0.920353
100259151	44.2	70.5033	62.2433	30.7167	32.7467	57.265	65.6767	47.69	79.4333	40.8833	-0.555435	0.507486	0.328219	0.908022	0.431564	0.385293	-1.24173	1.45036e-13	-0.252319	0.904476
100259167	27.925	39.7633	54.8	85.0333	76.83	52.18	53.4967	59.2333	66.36	88.8867	-1.04088	0.00933753	0.0815253	0.973999	-0.0923616	0.913917	0.451549	0.00145461	-0.395728	0.677632
100259174	5.33	4.34333	3.71333	2.09	1.08333	5.165	3.7	3.10667	3.72333	3.11333	-0.0653709	0.971747	0.712596	0.587501	0.268916	0.664375	-0.738257	0.0218672	-1.61215	4.47503e-05
100259194	33.09	14.0733	10.47	9.62	5.50333	12.565	13.1067	5.31	5.02333	11.4533	1.30356	0.193578	0.565294	0.698043	0.998056	1.26095e-05	1.03063	1.30022e-09	-1.41415	0.261421
100259199	31.345	6.21333	8.83667	13.28	10.5733	16.875	11.8833	10.4667	6.16333	5.84667	0.751959	0.386115	-0.61322	0.383017	-0.228744	0.921183	1.20048	1.29751e-06	0.665473	0.433058
100259201	1.315	0.27	3.19667	12.2167	17.1267	1.33	2.17667	2.29	1.10333	1.49333	-0.219329	0.957444	-2.68516	0.00831297	0.502581	0.769681	3.55845	4.03601e-11	3.27581	7.428e-07
100259213	94.46	41.64	33.6433	5.29667	3.82667	58.36	32.68	11.5233	4.76333	8.11333	0.582037	0.619052	0.793583	0.460614	1.55463	5.64251e-05	0.261976	0.778611	-1.52901	0.30759
100259215	18.745	22.06	24.7867	6.15	2.77	16.225	20.9733	7.68	1.68	1.04667	0.0619594	0.978189	0.312563	0.905322	1.72265	1.77815e-08	1.96422	0.0014574	1.11668	0.425656
100259216	0.635	0.07	0.06	0.4	0.466667	0.915	1.32667	1.49667	0.55	0.31	-0.544559	0.946345	-3.87121	0.026847	-4.56624	0.00572866	-0.356127	0.901119	0.73436	0.863764
100259233	254.46	150.733	230.823	296.577	244.317	585.4	308.323	358.99	196.017	175.557	-1.3282	0.00100215	-0.558477	0.725881	-0.610888	0.0525529	0.69706	0.0261301	0.342075	0.678346
100259258	4.285	0.316667	0.15	0.14	0.123333	0.45	0.33	0.12	0.133333	0.123333	3.12227	0.00271941	0.366532	0.960578	0.354679	0.970121	0.135954	0.9754	0.127679	0.977058
100259274	4.55	1.74333	0.806667	3.67333	4.21333	2.525	2.76667	1.57	1.55667	2.91	0.688071	0.6161	-0.300621	0.811689	-0.93178	0.166075	1.33561	5.44173e-07	0.38505	0.653897
100259275	7.89	3.61333	2.82	10.9533	17.2567	10.87	8.19667	8.06	6.79667	16.01	-0.620525	0.786875	-0.788389	0.334926	-1.50453	0.000308926	0.782123	0.0149334	0.177415	0.912614
100259280	14.625	16.6867	17.27	12.6033	14.6967	10.465	9.15667	6.46	19.6267	16.64	0.41539	0.906847	1.06425	0.443337	1.43659	4.68388e-08	-0.546491	0.156191	-0.139886	0.921225
100259291	25.81	2.13667	2.27667	1.51667	0.84	1.85	3.68333	2.14	3.56667	3.31667	3.60227	1.05119e-05	-0.39205	0.871483	0.100751	0.970121	-1.08562	0.0526955	-1.81738	0.0201533
100259312	11.59	2.26333	0.696667	0.0533333	0	5.975	0.453333	0.08	0.04	0.0533333	0.846704	0.738998	2.69523	0.00386238	3.18242	0.345074	0.547368	0.940001	-3.44766	0.758296
100259317	14.525	2.19	2.47667	1.76667	0.57	1.81	1.65	1.47	1.45667	0.643333	2.92393	0.00279749	0.704498	0.656364	0.772557	0.542547	0.373903	0.791131	-0.397311	0.893137
100259323	20.65	6.54	3.59667	2.05	1.01	10.53	9.80333	5.03667	6.29667	3.46333	0.807898	0.308436	0.0670466	0.978318	-0.476349	0.430717	-1.52321	3.82576e-06	-2.11079	0.0447833
100259329	23.645	15.79	89.92	286.133	451.967	52.83	85.6033	141.65	200.453	232.447	-1.27691	0.339061	-2.08258	1.96686e-07	-0.631426	0.130899	0.612164	0.00228244	1.06668	0.266205
100259358	9.825	16.5	11.8733	8.69667	5.06	13.435	11.6533	10.0467	10.15	11.8733	-0.626571	0.618343	0.937553	0.160213	0.261018	0.643875	-0.124209	0.915882	-1.23013	0.00253103
100259363	32.22	12.5367	5.85333	5.14333	1.62667	19.735	5.34	4.09	1.19333	1.25667	0.682204	0.900936	1.85201	0.1781	0.537477	0.750371	2.20023	0.00897176	0.205501	0.935836
100259374	8.79	1.94333	2.06333	0.24	0.153333	4.175	1.18	0.17	0.36	0.0433333	0.991562	0.691366	0.959707	0.604831	3.64124	0.000327755	-0.476411	0.909812	1.61375	0.859397
100259380	19.455	3.29	2.92	1.91667	1.34	3.025	2.9	2.71333	3.92667	3.06	2.60108	0.00856869	0.535724	0.582447	0.132484	0.970121	-0.938072	0.0651343	-1.13787	0.104537
100259386	4.82	1.05667	5.33333	34.08	32.7033	1.495	0.903333	4.04	3.49667	13.57	1.47752	0.567473	0.615089	0.827376	0.403638	0.964317	3.39269	2.81933e-19	1.3341	0.15992
100259462	21.205	6.34333	9.90333	17.1	22.8433	13.045	10.57	10.04	12.1633	10.8067	0.569108	0.57081	-0.398947	0.51624	-0.00305125	0.999362	0.586605	0.00138282	1.04794	0.00189762
100259463	2.815	35.79	77.1367	210.433	198.277	55.96	95.6133	126.7	112.417	62.4467	-4.51404	8.61628e-11	-1.14953	0.098706	-0.692661	0.021694	1.00723	0.000217547	1.63732	2.44102e-05
100259468	1.8	7.68	13.4667	11.8933	19.2033	16.74	29.8767	29.2933	22.0333	10.2033	-3.27502	0.00914166	-1.63403	0.0290407	-1.10762	0.000482947	-0.799114	0.153663	0.92282	0.118949
100259470	1.455	5.7	16.1033	34.9833	30.25	12.325	14.8467	25.9333	15.9233	13.3233	-3.22016	1.2436e-11	-1.06593	0.0138898	-0.653288	0.0756681	1.22376	2.25575e-06	1.16124	0.00552674
100259499	1.805	1.41333	2.68	1.98667	1.32667	1.11	1.41	1.18667	1.18333	1.45333	0.575028	0.539576	0.255934	0.921088	1.18014	0.000466039	0.838317	0.0398224	-0.0820621	0.943048
100259502	0.145	0.72	2.04	0.956667	0.586667	0.595	0.79	2.77667	3.07	1.43333	-2.14158	0.564144	0.0552462	0.982839	-0.409905	0.970121	-1.58747	0.00220908	-1.19373	0.550376
100259527	12.98	14.2133	13.6867	5.66	5.14333	8.665	11.7767	9.23333	14.2467	9.56667	0.453936	0.551759	0.506297	0.758882	0.579785	0.15428	-1.23861	8.28753e-08	-1.08929	0.158784
100259548	17.26	17.1767	3.78	0.896667	1.00667	6.265	4.46333	2.33	7.35667	2.45	1.34064	0.275929	2.51556	0.00487273	0.717458	0.532382	-2.92805	4.90096e-08	-1.59316	0.202606
100259559	14.74	2.1	1.51	0.183333	0.18	1.685	0.703333	0.416667	0.28	0	3.01122	0.000872334	2.01454	0.449225	1.87847	0.384935	-0.530841	0.915723	3.12027	0.600053
100259567	6.895	0.363333	0.123333	0.0733333	0.0466667	0.01	0.0566667	0.0333333	0.0666667	0.0233333	9.08919	0.00203805	3.5837	0.187134	2.00966	0.671022	0.298359	0.949489	0.901283	0.904476
100259585	8.915	2.03333	2.11667	1.58	0.423333	0.88	3.04667	0.74	2.18667	3.62333	3.28743	0.0363986	-0.231695	0.960578	1.55508	0.140622	-0.402006	0.930101	-3.42736	0.000129759
100259589	104.975	182.323	29.16	40.9167	22.9067	86.29	160.457	147.713	80.2633	20.9967	0.0579688	0.990299	0.626398	0.70987	-2.313	5.45502e-06	-0.885647	0.0264242	0.14233	0.906471
100259597	45.15	50.79	44.1	32.7733	36.15	26.175	24.63	30.8933	38.69	31.72	0.688047	0.524731	1.36152	2.09389e-05	0.5332	0.0142972	-0.147406	0.577791	0.11997	0.800405
100259599	2.775	1.65333	4.48667	5.65333	6.37333	3.8	5	3.64667	6.42	4.83	-0.625848	0.725138	-1.25262	0.00527576	0.316796	0.629321	-0.0845068	0.867329	0.456353	0.71146
100259623	9.75	5.88333	10.1767	10.0633	1.33667	21.24	10.05	5.98667	2.35333	2.17333	-1.19459	0.3991	-0.262786	0.943906	0.782169	0.5469	2.18782	0.00749653	-1.1092	0.672131
100259648	32.86	48.0433	30.7467	125.607	97.81	93.7	115.88	97.4033	113.197	56.0533	-1.58064	0.134527	-1.00391	0.187134	-1.63198	4.63105e-05	0.243656	0.60013	0.423068	0.856183
100259655	199.15	110.247	91.9667	169.007	112.4	227.315	231.107	210.813	163.47	131.433	-0.357177	0.865223	-0.803069	0.330203	-1.1819	5.69876e-06	0.149284	0.86848	-0.129048	0.935836
100259720	7.22	5.62333	5.62	2.03667	1.11	3.84	4.07333	5.27	5.20667	1.93333	0.743462	0.526061	0.893003	0.225392	0.108672	0.970121	-1.2559	0.000242724	-0.775443	0.402301
100259738	3.82	2.90667	1.02	0.836667	0.453333	3.26	2.40667	1.27	2.47333	2.53	-0.0683412	0.993854	0.936655	0.745603	-0.319695	0.967639	-1.46292	0.000132722	-2.54153	5.54256e-06
100259742	5.27	0	0.0366667	0	0	0.05	0	0.0333333	0.0533333	0.0166667	6.41655	0.000233262			-0.0281796	0.999362	-2.30608	0.855077	-1.02622	0.935836
100259752	33.215	20.26	46.9033	77.93	59.66	38.44	43.5167	43.6967	35.3233	47.8567	-0.324883	0.835005	-0.501704	0.883649	0.129765	0.970121	1.22924	0.000578174	-0.0198833	0.994757
100259777	0.015	2.53	0.236667	0.68	0	1.31	0.44	0.296667	0.0633333	1.85667	-6.59397	0.0461189	2.86009	7.27321e-07	-0.347643	0.970121	3.45498	0.700159	-8.88999	0.200882
100259778	3.475	4.35667	6.51333	3.3	1.46333	2.105	3.05667	2.42	4.02667	2.22333	0.693199	0.844774	0.76312	0.554989	1.43819	1.40996e-05	-0.202454	0.872271	-0.653733	0.372425
100259799	23.19	3.87	3.99667	1.33	0.686667	2.48	5.11333	3.59	3.46667	1.74	2.98859	0.0600324	-0.00382377	0.99716	0.173118	0.947787	-1.28428	0.0024308	-1.40847	0.130602
100259819	13.225	22.5833	35.3667	21.5533	22.7133	20.155	17.79	15.3367	26.5833	25.8933	-0.726966	0.326561	0.694117	0.4133	1.23396	7.26558e-05	-0.206074	0.592826	-0.482105	0.757536
100259836	34.315	18.69	45.7467	108.43	96.5767	93.325	76.5667	77.3267	84.15	103.6	-1.58078	0.0263514	-1.64461	0.00165072	-0.740093	1.05694e-06	0.464101	0.103601	-0.0984238	0.916092
100259841	0.035	0	0	0.626667	0	0	12.3467	0	0	0.0266667	1.25554	0.946345	-23.3272	2.17128e-06			5.57945	0.144057	-1.02622	0.935836
100259921	46.245	44.44	0.623333	0.236667	0.106667	12.8	6.77667	3.84333	1.37667	1.28333	1.75445	0.294171	3.35845	0.0332426	-2.69541	0.00606063	-2.63762	0.263813	-3.45798	0.253951
100259927	0.86	2.14333	1.34333	11.5333	18.2167	0.53	4.05333	7.25333	31.9733	41.77	0.667757	0.923736	-0.387059	0.946794	-2.42767	0.000837564	-1.38204	0.00475515	-1.10164	0.315082
100259946	10.735	13.43	5.79667	6.34667	3.15333	41.665	16.3833	6.62667	2.57	6.17667	-2.09089	1.82292e-08	0.401632	0.946944	-0.155746	0.970121	1.40509	0.00780819	-1.60177	0.575585
100259982	1.89	2.74667	1.08333	0.616667	0.166667	1.95	1.69333	0.576667	0.766667	3.11	-0.120666	0.969794	1.27209	0.584399	0.919172	0.230591	-0.245445	0.91027	-4.88805	0.00615848
100259984	0	0.0166667	0.0333333	2.47	0.1	0	0.216667	0.0333333	1.84	9.00667			-3.16258	0.761387	0.0925975	0.999362	0.507505	0.940001	-6.36638	4.25964e-06
100259991	0.33	0.07	0.0966667	3.94	0.09	0.675	0.24	1.18333	0	0.713333	-1.19403	0.840474	-1.17666	0.893157	-3.72319	0.00125273	9.04869	0.044752	-3.69391	0.177813
100260029	38.64	103.393	69.4767	66.4067	70.19	73.915	62.1633	59.2233	68.0067	119.917	-1.07198	0.00958222	1.37204	0.379045	0.251273	0.384477	0.0612333	0.920413	-1.10981	0.345592
100260054	0.045	81.6767	89.86	78.5033	70.79	29.745	66.7267	87.4733	54.0733	62	-9.48846	8.15084e-10	0.794184	0.576087	0.0661079	0.970121	0.637585	0.00381143	-0.0238182	0.991635
100260066	0.62	24.2867	37.58	7.98667	8.81	8.935	23.2367	12.1633	17.59	22.1567	-3.93178	3.43103e-08	0.529032	0.833258	1.64094	1.07099e-16	-1.06698	0.0151183	-1.57304	0.0492744
100260073	1	1.55333	1.84667	1.00333	0.866667	1.515	0.96	0.746667	1.06333	1.24333	-0.688565	0.731508	0.952726	0.401716	1.32524	0.000318488	0.012817	0.986771	-0.562609	0.441128
100260085	24.66	7.86667	15.36	20.3567	20.9133	21.025	12.8833	13.04	8.15667	11.8533	0.0980394	0.972853	-0.31792	0.811826	0.246019	0.894842	1.40999	0.000311905	0.659982	0.371298
100260104	74.885	13.4533	5.44667	0.813333	0.113333	19.99	12.5633	1.18667	0.61	0.27	1.75367	7.13273e-06	0.433829	0.921088	2.21341	0.00077209	0.513939	0.828811	-1.43207	0.5836
100260124	0.56	2.80333	2.05	2.82	3.4	1.985	2.86	3.17333	4.96667	8.52	-2.04894	0.358042	0.506835	0.883367	-0.601145	0.679649	-0.714742	0.358383	-1.37352	0.00256784
100260142	27.415	2.50667	1.62	1.32	1.23333	2.22	2.99333	1.29333	1.52	1.99333	3.44187	3.39073e-06	0.128948	0.973999	0.337106	0.776893	-0.105807	0.913878	-0.79678	0.173448
100260148	36.84	8.80667	7.91	17.2633	14.6933	16	10.97	11.02	8.98333	9.06667	1.129	0.358042	0.2193	0.960578	-0.456672	0.156993	1.02364	0.00782985	0.32056	0.901295
100260154	0	5.92333	20.6467	15.9833	13.9167	2.98	10.43	23.58	19.46	11.3533	-8.96024	0.00036866	-0.392095	0.765024	-0.156767	0.970121	-0.187378	0.776367	0.141267	0.922337
100260158	12.765	103.09	202.317	314.2	242.67	91.7	116.977	193.207	198.57	151.57	-2.91676	0.000178749	0.253874	0.921088	0.0780072	0.977087	0.759607	0.00136812	0.541201	0.37864
100260170	0.245	1.96667	0.113333	0.0433333	0	6.06	0.376667	0.09	0	0	-4.72582	0.538503	2.72329	2.87133e-05	0.298033	0.979455	2.99395	0.77651
100260215	0.02	2.09667	5.54667	3.90333	3.82667	0.355	2.2	10.91	7.64	10.3033	-4.23336	0.393604	0.284645	0.916276	-0.943227	0.774522	-0.881859	0.336031	-1.49782	0.0096737
100260227	3.14	7.47667	2.60667	1.32333	0.49	2.225	2.49667	0.51	0.6	0.746667	0.357974	0.946345	1.76793	0.16492	2.38079	0.000169992	1.20162	0.643468	-1.11228	0.664605
100260250	0.75	4.66	4.31	2.79333	2.08333	24.25	14.5433	9.04333	3.12333	3.62	-5.25124	6.54942e-07	-1.23999	0.0561869	-1.05834	0.00597928	-0.0745687	0.940001	-1.17077	0.427134
100260268	9.585	20.5033	29.9567	33.57	35.5467	22.69	32.1367	37.9667	43.66	32.3633	-1.39451	0.00750983	-0.278948	0.775257	-0.326928	0.503515	-0.273226	0.0943229	0.0759604	0.920353
100260276	1.025	1.31333	0.516667	1.54333	0.626667	0.925	1.03	0.526667	3.58667	7.51	0.0540977	0.993529	0.985063	0.763317	-0.0231096	0.999362	-1.12394	0.321948	-3.53183	1.08177e-05
100260282	44.72	46.33	16.2133	9.96333	1.64667	19.755	27.4967	27.57	15.8067	3.55667	0.984669	0.400965	1.13221	0.00123287	-0.754624	0.0769839	-0.571683	0.42011	-1.3651	0.319883
100260288	0.265	1.11667	4.17	8.84333	8.63667	1.625	2.33	4.47667	3.53333	7.23667	-2.72136	0.0374854	-0.827971	0.688507	-0.0722705	0.970748	1.41978	3.69196e-07	0.413386	0.884025
100260313	3.885	17.1833	20.71	12.7733	15.5333	26.41	17.3	25.6133	19.9567	19.6333	-2.85622	4.39055e-05	0.472885	0.803607	-0.278869	0.827513	-0.552296	0.0234926	-0.583639	0.604518
100260321	1.745	0.77	0.853333	0.49	0.603333	1.12	0.54	0.42	0.703333	0.493333	0.672761	0.928201	0.83752	0.36643	1.06428	0.00627819	-0.446882	0.417121	0.296696	0.805673
100260339	73.5	55.7667	31.48	73.7633	60.6367	59.955	74.3967	68.3867	68.4333	62.6367	0.157898	0.946345	0.0246093	0.98138	-1.04183	0.0029968	0.139939	0.674561	-0.0671383	0.935836
100260346	17.625	16.5867	14.55	8.41333	6.62	12.555	18.31	13.34	17.63	13.8767	0.339591	0.905603	0.205186	0.847758	0.145428	0.88794	-0.972727	2.08167e-06	-1.12976	2.61233e-05
100260421	44.44	7.84333	2.93333	0.49	0.406667	9.36	3.16667	2.65	1.48333	1.45333	2.12085	6.6567e-05	2.03097	0.257351	0.148545	0.970121	-1.49594	0.00155898	-2.02845	0.0118863
100260426	14.43	28.97	20.3833	13.01	12.96	19.485	15.7767	12.7167	16.83	16.2233	-0.565732	0.514769	1.32152	0.00991367	0.695371	0.0152555	-0.273648	0.327103	-0.482317	0.538734
100260432	30.9	12.9733	14.77	9.75333	5.59	12.94	9.36333	6.83333	6.7	5.33333	1.13331	0.112053	0.774426	0.554989	1.1267	6.78352e-05	0.64221	0.0648528	0.0668167	0.953582
100260447	7.075	5.22667	6.78	2.74667	4.22667	6.88	5.86	5.31667	8.1	3.53	-0.132847	0.946345	0.100053	0.973999	0.346984	0.566755	-1.49352	1.27692e-08	0.30724	0.737404
100260458	0	4.61333	14.83	23.22	21.0367	2.735	12.8433	19.1467	19.11	19.5	-9.11467	1.68128e-05	-1.13263	0.237712	-0.360503	0.668056	0.388164	0.657259	-0.0238284	0.9873
100260477	1.23	4.99667	7.41	9.35333	6.86333	11.695	8.79667	9.26	4.05	5.91333	-3.38772	5.92628e-11	-0.461709	0.67416	-0.297677	0.862547	1.30008	0.000243595	-0.125515	0.941395
100260494	2.915	7.51	4.40333	4.55	4.55	5.825	12.27	10.5667	9.76333	12.71	-1.17672	0.439796	-0.220409	0.944683	-1.2408	1.54471e-05	-0.999321	0.000740921	-1.45467	0.00016854
100260500	13.035	23.6667	37.0233	37.3867	33.3433	34.89	40.5233	41.18	43.0967	24.25	-1.55617	0.00156419	-0.562082	0.770982	-0.124873	0.937397	-0.108421	0.735981	0.549625	0.628259
100260517	0.705	2.63667	7.78667	8.70333	13.5833	4.905	11.49	11.1767	12.0467	14.5333	-3.07113	0.189	-1.78267	0.00279119	-0.487544	0.680984	-0.354938	0.412445	-0.182359	0.886506
100260528	2.5	0.45	0.156667	0.03	0.0233333	0.385	0.133333	0.0633333	0.17	0.24	2.57152	0.00210677	1.98144	0.432899	1.34021	0.66621	-2.30999	0.202972	-3.18567	0.221528
100260532	2.105	0.21	0.34	0.22	0.0933333	0.325	0.356667	0.276667	0.113333	0.0766667	2.61445	0.00420772	-0.451885	0.937355	0.329317	0.957793	0.949424	0.692546	0.0311964	0.994757
100260564	3.245	3.99333	4.85333	4.48333	2.46333	13.67	8.27	7.03667	3.89667	1.89667	-2.21712	2.32275e-06	-0.799545	0.467288	-0.509459	0.504124	0.292578	0.785433	0.00747905	0.996992
100260571	174.26	26.61	23.7367	28.8967	48.23	53.875	54.8133	22.5133	18.7333	21.2133	1.54632	0.00700826	-0.691493	0.263791	0.0931501	0.970881	0.720226	0.187429	1.00783	0.233822
100260595	0.975	0.483333	0.72	0.936667	0.583333	0.99	0.783333	1.15333	1.47333	1.81333	-0.183418	0.946345	-0.314361	0.91497	-0.66124	0.348273	-0.594317	0.404276	-1.7131	6.74636e-06
100260596	21.37	16.6933	27.9267	61.8133	58.5767	45.77	47.27	42.4967	38.3667	52.8233	-1.26397	0.090136	-1.16906	0.00124222	-0.589055	0.000661375	0.786695	1.56335e-05	0.165218	0.858122
100260599	93.795	5.94667	8.58	4.52333	2.32	7.645	2.96667	2.97667	1.83	0.766667	3.50212	0.00539752	1.48826	0.355321	1.55777	0.135694	1.40041	0.259286	1.50729	0.0372458
100260625	0.585	0.193333	1.39333	0.65	0.333333	0.09	0.263333	0.25	0.48	1.08333	2.56107	0.156636	-0.263394	0.96273	2.49401	0.000884977	0.524856	0.734837	-1.75037	0.00410936
100260651	0.615	0.373333	3.79667	1.29	0.736667	0.23	0.39	1.09333	4.57	3.75	1.31974	0.740925	0.312386	0.95028	1.84973	0.576072	-1.73412	0.00744671	-2.33924	0.00172105
100260655	41.235	18.84	11.3933	6.42333	4.59	15.81	14.3667	14.15	8.50333	6.68333	1.24671	0.00232551	0.92384	0.460744	-0.294133	0.52679	-0.312992	0.47106	-0.73142	0.366906
100260656	6.97	2.46333	2.69333	0.296667	0.0533333	2.47	1.42	0.433333	0.166667	0.0666667	1.36002	0.211449	1.11302	0.200029	2.66136	0.00784972	0.897027	0.829404	-0.779048	0.925769
100260659	15.695	4.02	1.99333	0.616667	0.546667	1.965	1.83	1.37667	0.76	0.443333	2.80226	0.00219138	1.73421	0.262349	0.540803	0.74785	-0.200389	0.940001	0.308486	0.904476
100260696	5.245	62.2667	26.2033	38.12	43.8933	29.795	40.6867	38.86	34.6233	72.2233	-2.62476	0.00113105	1.25729	0.456811	-0.546382	0.0795858	0.236056	0.337311	-1.22962	0.543051
100260740	10.615	18.4267	21.3267	27.43	32.98	20.87	21.7167	20.4567	24.4367	31.5067	-1.10813	0.00475307	0.231637	0.938233	0.0790522	0.970121	0.261135	0.0984516	-0.0696007	0.935836
100260747	34.485	17.1033	8.95333	2.93	6.17333	6.03	11.55	13.4767	10.0167	7.18667	2.40693	6.32751e-05	0.766997	0.699955	-0.573785	0.146052	-1.68567	0.00289927	-0.119823	0.937365
100260772	2.8	7.34333	10.4633	12.5867	7.37	28.185	15.0533	8.51	8.40667	5.41	-3.46928	9.46439e-11	-0.780656	0.688145	0.349625	0.895277	0.688301	0.378211	0.148606	0.93816
100260786	0.275	0.786667	1.69667	5.07333	85.1067	1.145	2.08	1.83	0.956667	8.19333	-2.2471	0.417914	-1.04189	0.380254	-0.0916528	0.975442	2.53315	3.23279e-05	3.05914	0.00157786
100260799	3.055	4.23667	9.40333	9.06333	6.59667	4.52	4.48333	6.33	3.49	2.99333	-0.753274	0.688727	0.374439	0.920306	0.604074	0.668178	1.47589	0.00478136	0.809573	0.596412
100260805	9.765	0.583333	0.64	0.163333	0.223333	0.64	0.376667	0.106667	0.213333	0.11	3.75461	0.00441516	1.05545	0.883566	2.61846	0.717498	-0.268448	0.976618	1.03817	0.897054
100260820	1.97	0.456667	0.93	2.37333	2.71	1.965	1.38	0.813333	0.773333	0.973333	-0.146473	0.948753	-1.23005	0.184627	0.203915	0.970121	1.72042	0.00018421	1.41332	0.00172105
100260840	6.085	9.96667	4.88667	9.88333	4.85333	5.445	6.31667	5.67667	5.02	2.70333	-0.0316296	0.993854	1.08207	0.146879	-0.179662	0.970121	1.06193	0.000583733	0.779447	0.11962
100260858	9.865	23.4867	21.0433	11.37	8.88333	9.6	9.54667	8.30667	11.5067	9.58333	-0.0873588	0.946345	1.63419	1.22455e-05	1.36556	8.40986e-05	0.0739755	0.901119	-0.269794	0.801812
100260881	40.325	48.28	63.5633	74.2733	81.93	79.54	80.7833	84.06	72.0667	62.94	-1.11852	0.00993198	-0.405248	0.398999	-0.382108	0.0204484	0.142156	0.513106	0.30027	0.465901
100260891	4.81	2.35667	0.623333	0.166667	0.31	0.33	0.08	0.02	0.1	0.04	3.73738	0.000798363	5.14483	0.000209991	4.88465	0.0652519	0.828666	0.837889	2.9235	0.266949
100260903	7.22	2.1	0.643333	0.436667	1.02	0.99	0.53	0.25	0.433333	0.696667	2.70075	0.000695221	2.60303	0.110256	1.38238	0.610284	0.107234	0.96264	0.301187	0.921974
100260905	9.905	7.59	2.61667	2.42	3.52	20.53	3.43	2.56667	2.18333	2.58667	-1.24533	0.595651	1.46046	0.00110587	0.0423445	0.998188	0.244172	0.903457	0.451079	0.653184
100260907	415.565	107.953	98.63	72.0367	64.4433	232.145	88.2833	71.1667	42.27	23.3433	0.707836	0.359774	0.524389	0.804085	0.492857	0.331348	0.865589	0.0757736	1.50529	0.000323938
100260988	4.045	10.7967	14.2567	17.47	15.4167	19.575	19.3433	19.1567	20.3433	17.7567	-2.40949	9.87298e-10	-0.522956	0.486408	-0.400819	0.195831	-0.123133	0.82591	-0.242962	0.645391
100261023	0.72	0.326667	0.656667	4.85333	5.52667	1.705	3.57	3.56	1.52	2.51	-1.47694	0.723019	-3.09761	0.0123478	-2.39407	0.0231752	1.77386	0.00682289	0.848299	0.571443
100261030	11.455	26.7733	36.15	30.0167	37.3767	28.74	29.78	28.0867	32.27	39.7867	-1.42257	0.000195358	0.306124	0.843457	0.376606	0.200577	-0.03221	0.940001	-0.25056	0.803508
100261063	2.635	0.803333	1.16333	1.28	2.66	3.06	2.13333	1.62667	1.56667	1.10333	-0.308781	0.941104	-1.04912	0.382273	-0.468089	0.758179	-0.189428	0.903457	1.21799	0.0089698
100261069	1.65	2.69333	1.97333	4.87	3.37	2.115	2.67333	5.62333	7.84	6.93	-0.501391	0.779144	0.389496	0.748937	-1.50476	1.52613e-08	-0.600659	0.1595	-1.06812	0.009814
100261075	5.02	1.92	4.44667	8.18333	4.79333	4.685	3.53333	4.06333	2.79	3.54	-0.0717186	0.982497	-0.467362	0.779519	0.147934	0.970121	1.64961	0.000346955	0.33036	0.810701
100261077	93.07	29.8833	47.76	12.2133	35.54	7.665	9.68667	11.9	36.0633	9.08333	3.5254	2.51104e-06	1.86597	0.00695912	2.04247	1.13779e-08	-1.45568	0.00231765	1.84707	0.00836486
100261078	12.175	9.21	8.78667	1.95667	1.72667	7.52	5.92333	6.30667	6.06333	3.07333	0.500328	0.831334	0.943713	0.264795	0.461759	0.664089	-1.47983	0.000369549	-0.808184	0.425469
100261109	4.285	25.8433	1.40333	1.23333	0.583333	4.285	6.67667	11.18	13.55	12.06	-0.173897	0.965037	2.65043	0.180639	-2.98544	1.52613e-08	-3.37007	5.80996e-11	-4.20977	0.0016248
100261157	0.025	22.1467	58.5067	109.93	98.8567	35.965	77.3067	101.477	79.77	77.4733	-11.135	3.57493e-08	-1.41875	0.100766	-0.772166	0.0854802	0.561961	0.0664733	0.376841	0.57119
100261165	9.925	3.6	7.18667	14.0933	22.0533	11.055	9.32	8.64667	9.80667	6.68333	-0.271728	0.920125	-1.08562	0.175514	-0.241794	0.840312	0.621972	0.0190957	1.66895	2.54711e-07
100261190	12.75	4.82333	5.79667	10.16	9.83	13.715	9.07	6.79	5.19667	5.67667	-0.242224	0.869026	-0.56664	0.342899	-0.196834	0.928064	1.06305	1.61716e-05	0.627164	0.388611
100261203	6.85	5.33333	3.51	3.88	3.37667	6.12	1.26	1.45	1.03333	1.46667	0.19459	0.975484	2.63983	0.0077438	1.29287	0.0306774	1.99825	0.000914454	1.10795	0.124385
100261217	10.345	7.08	8.42667	5.30667	3.32667	18.405	13.4333	6.37667	6.49	9.33667	-1.02077	0.665044	-0.44586	0.806817	0.422909	0.701281	-0.198788	0.721715	-1.60599	1.611e-05
100261242	0.395	7.41	4.99	10.8	11.86	4.255	2.28	1.68667	1.48333	11.26	-3.53808	0.072541	1.83123	0.667296	1.59654	0.247014	2.96026	3.9997e-06	0.122531	0.935836
100261255	12.965	4.90333	6.59	9.88333	5.10667	7.42	6.73667	7.72333	4.73	2.98333	0.622279	0.836809	-0.100753	0.973999	-0.192334	0.960724	1.16158	0.00438367	0.430891	0.863327
100261279	19.12	0.87	0.873333	1.04667	1.62	2.885	9.65	0.0533333	0.196667	5.69333	2.54566	0.000872334	-2.94655	0.613251	4.05064	0.120775	2.49567	0.210877	-2.49393	0.497616
100261290	50.195	72.31	36.3267	26.8533	28.6233	37.875	47.21	71.14	66.67	19.3033	0.205479	0.946345	0.900256	0.417562	-0.939836	0.00418575	-1.21218	1.13866e-10	0.704902	0.642734
100261299	39.415	7.09667	3.86333	1.26333	1.15333	2.405	1.79333	1.22333	1.96333	1.13333	3.9376	2.05157e-11	2.57071	0.0436682	1.63323	0.072322	-0.54837	0.651917	-0.234943	0.920001
100261307	0.63	1.50667	1.32333	0.496667	0.07	0.62	2.38667	1.16667	2.7	5.3	-0.115253	0.991904	-0.324322	0.951463	0.18767	0.975016	-2.35254	0.00419011	-6.14127	0.00538936
100261309	9.18	8.85	7.38	19.2433	15.0233	15.645	12.3967	10.9267	9.25333	19.6967	-0.910667	0.162581	-0.162128	0.946184	-0.548677	0.118872	1.15209	7.76763e-14	-0.469019	0.126108
100261311	214.71	591.407	831.45	544.583	317.683	806.7	807.583	677.173	402.27	258.89	-2.03908	1.43011e-07	-0.199774	0.960578	0.3127	0.669197	0.539185	0.197389	0.350496	0.760965
100261327	15.72	7.59	5.56333	6.31	3.43667	17.96	9.64333	5.74667	6.08333	8.82333	-0.32926	0.813778	0.252579	0.960578	-0.0281036	0.995704	0.150762	0.835487	-1.51469	0.00156482
100261336	3.135	0.0366667	0.07	0.0366667	0.0466667	0.23	0.113333	0.0533333	0.0533333	0.02	3.65489	0.000745881	-1.34997	0.847406	0.355966	0.970121	-0.536462	0.93538	1.11189	0.867932
100261354	107.975	37.34	4.68	2.66333	1.85667	12.525	10.1833	9.05	7.78333	3.15333	3.05529	0.00183591	2.30956	0.0319833	-0.925848	0.00837755	-1.45325	0.000725568	-0.644295	0.744796
100261385	149.52	192.863	74.4067	34.0667	24.34	89.98	111.577	59.57	68.5333	128.237	0.663024	0.731508	1.38256	0.292751	0.329671	0.590723	-0.919061	0.0224417	-2.81879	0.00910862
100261407	21.405	63.8567	65.6267	25.7767	21.0267	78.77	64.54	63.45	38.2167	26.67	-1.98559	5.13456e-05	0.249164	0.905322	0.070605	0.970121	-0.468613	0.314472	-0.681091	0.666804
100261471	0.56	1.94	1.72333	1.48333	2.30333	0.785	1.22667	2.19667	3.72667	3.63333	-0.657518	0.886633	1.12838	0.309337	-0.341558	0.812303	-1.23275	0.0050289	-0.754416	0.181676
100261475	11.68	2.76667	3.05667	1.66333	0.72	3.575	1.80333	1.5	1.97	1.03	1.5893	0.426024	0.952283	0.0776021	1.06608	0.00999589	-0.141111	0.918848	-0.508175	0.613042
100261485	15.66	18.3067	29.14	25.74	26.6	32.825	34.3967	34.0867	22.63	16.52	-1.21726	0.00775352	-0.616378	0.353582	-0.204339	0.760743	0.281748	0.147511	0.6323	0.0218004
100261497	14.12	37.0967	1.42	0.516667	0.366667	4.095	4.06	4.10667	1.97	0.95	1.68299	0.459676	3.72945	0.00624256	-1.50786	0.174573	-1.83768	0.135216	-1.25167	0.722071
100261507	102.91	25.9233	27.3067	9.47667	4.01	17.16	41.0367	5.73	17.9767	24.9967	2.52425	0.163784	-0.241714	0.924858	2.25687	1.91539e-06	-0.839165	0.609362	-2.84024	0.0202599
100261518	8.2	39.7267	30.2667	9.53333	7.09667	13.555	19.4633	19.24	19.4367	31.82	-0.879661	0.664361	1.515	0.1291	0.645078	0.203547	-0.898876	0.0162129	-2.2502	3.0344e-08
100261545	16.405	7.58333	5.38333	2.22	0.96	8.62	6.03	2.56667	2.86667	3.05667	0.888924	0.703773	0.633885	0.709522	1.08742	4.10486e-05	-0.271155	0.812749	-1.94744	0.0641667
100261582	28.885	8.99333	5.35333	2.8	2.93	7.465	6.01667	5.35	5.73	3.17333	1.83653	0.00799108	0.830568	0.554138	0.0292794	0.999134	-0.930594	0.0387254	-0.0749142	0.958579
100261583	34.895	4.75667	0.203333	0.09	0.03	1.825	0.436667	0.143333	0.283333	1.11667	4.21122	0.000427916	4.09831	0.0406174	0.534911	0.970121	-1.44381	0.733288	-4.93719	0.38037
100261608	21.955	1.02667	1.83	2.95333	5.87667	3.36	3.92333	4.39	2.58333	1.39667	2.63509	0.00787585	-1.61666	0.409342	-1.23999	0.533585	0.279866	0.912631	2.15776	0.0469804
100261619	18.08	32.9767	17.1033	8.03667	4.76667	2.215	46.7967	4.93667	76.8767	48.8433	2.97073	0.07748	-0.0501127	0.976418	1.76802	0.666505	-3.17806	0.00863627	-3.66517	0.00122883
100261655	14.295	25.08	19.1867	24.8433	25.2767	28.325	23.28	22.5067	27.3233	44.7733	-1.11544	0.00770679	0.730246	0.753365	-0.214622	0.620222	-0.0403859	0.940001	-1.24142	0.402463
100261661	0.685	0.0366667	0.0133333	2.14	0.03	0.385	0.0433333	0.73	0.0266667	0.1	0.540003	0.955254	-0.182101	0.981284	-5.55292	0.00299775	6.3306	0.339752	-2.2771	0.744979
100261667	144.195	312.083	412.11	239.493	187.533	376.885	447.847	357.837	277.02	177.013	-1.49486	0.00787585	-0.192998	0.883649	0.223458	0.744887	-0.111767	0.868765	-0.120876	0.935836
100261690	9.425	1.80333	0.906667	0.51	0.156667	1.405	1.66	0.563333	0.626667	0.243333	2.59407	9.33919e-07	0.392755	0.848532	0.713257	0.549894	-0.263244	0.885734	-0.627248	0.767984
100261736	179.72	175.017	109.273	59.1533	26.0733	196.105	160.667	137.887	93.75	60.3867	-0.280765	0.840884	0.541357	0.462676	-0.318829	0.498846	-0.565531	0.219921	-1.3725	0.00920111
100261743	68.965	213.593	56.1767	5.13	7.91333	13.62	68.8033	72.9267	121.5	6.11667	2.05798	0.376847	2.07968	0.00636165	-0.352624	0.970121	-4.46274	9.2164e-26	0.553164	0.88761
100261754	111.115	41.31	7.78333	14.3333	6.96	20.63	11.2633	8.03667	7.83	9.95333	2.42366	0.174099	2.4418	0.00486337	-0.0313276	0.99265	0.963793	0.0270553	-0.485283	0.520095
100261829	461.715	158.383	68.2767	12.07	5.78	113.405	91.0233	45.5167	18.6233	6.96667	1.89526	3.88915e-08	1.11352	0.0952647	0.605277	0.330098	-0.540852	0.498082	-0.468304	0.667437
100261839	223.635	99.1867	52.5933	20.2567	4.97667	79.26	60.6933	21.7133	17.7733	21.9167	1.36312	0.539402	1.1219	0.0139641	1.29901	0.000104976	0.262593	0.940001	-2.43342	0.00564485
100261842	1.635	1.69	2.04	1.02	0.79	1.055	1.43	1.69333	2.08333	2.50333	0.521006	0.895741	0.739603	0.590952	0.305318	0.901753	-0.974798	0.0149401	-1.81994	5.84288e-05
100261951	4.18	6.29	10.16	10.87	5.58	4.545	3.61667	8	3.77333	6.92667	-0.356999	0.946345	1.01273	0.654792	0.356839	0.895277	1.62323	0.000121541	-0.254692	0.882829
100261982	1.625	1.00667	0.576667	0.35	0.423333	0.76	1.08667	0.57	4.57	13.03	0.957355	0.814792	0.479683	0.943906	0.0317677	0.999362	-3.61347	2.8407e-10	-4.83104	8.44347e-09
100261985	343.225	310.11	193.193	7.88667	4.98667	109.975	112.037	44.9033	305.12	224.663	1.35819	0.763052	1.90769	0.00513897	2.08975	0.0566206	-5.15505	1.07309e-06	-5.40678	7.86788e-16
100262011	8.565	1.23667	3.11667	6.29333	9.55667	1.315	3.64333	1	2.66667	4.36	2.65884	0.0883871	-1.25781	0.626897	1.67431	0.0217501	1.33653	6.15929e-05	1.08828	0.0469793
100262023	1.39	0.546667	0.126667	0.0166667	0	0.54	0.16	0.0433333	0.00333333	0.0333333	1.13154	0.721223	2.15369	0.00695912	1.27116	0.663712	1.62477	0.865771	-4.04262	0.690703
100262060	7.53	3.72667	3.20333	2.50667	3	3.84	4.04333	3.18333	1.85	6.02667	0.795852	0.602035	0.309815	0.949727	0.0271201	0.999362	0.531173	0.467889	-1.07193	0.00955942
100262068	10.375	1.86333	2.45	1.34	1.12	1.255	1.35	1.40333	1.14333	0.473333	2.94387	0.00456113	0.868323	0.377925	0.827728	0.49709	0.336539	0.817192	0.941313	0.58635
100262082	6.415	3.33	0.79	1.62667	0.69	5.685	6.63333	3.29333	1.37333	4.24333	-0.0848424	0.990466	-0.382811	0.937121	-2.02618	0.00168228	0.317957	0.940001	-3.22809	0.132617
100262101	9.335	3.10667	1.64333	1.21667	0.486667	2.09	2.12667	0.613333	0.863333	0.67	2.10907	0.0780409	1.03274	0.54767	1.43842	0.00275845	0.584319	0.329394	-0.674827	0.617441
100262112	1.56	21.3133	18.77	24.6367	34.6533	28.12	26.1567	28.7567	30.03	39.17	-4.24757	0.000202134	0.135583	0.960578	-0.58771	0.156261	-0.188943	0.49277	-0.323501	0.680406
100262117	0	0	0	0.01	0.02	0	0	0	0.55	0.363333							-5.61226	0.00273238	-3.99972	0.366765
100262131	0.165	1.08	0.646667	0.516667	0.286667	1.81	0.686667	0.476667	0.446667	0.536667	-3.58911	0.00673659	1.14078	0.506316	0.452604	0.91817	0.299236	0.880413	-1.3023	0.543665
100262206	595.615	42.2833	5.96667	4.62333	2.26667	33.075	6.58333	3.25	3.33333	2.24333	4.16709	0.00808742	3.352	0.00663216	0.899886	0.275827	0.57277	0.505933	-0.0420655	0.988686
100262207	2.89	2.01333	8.35333	13.5667	16.4933	6.74	10.7933	8.91	10.4167	8.88333	-1.36243	0.3333	-2.16577	0.00758385	-0.0705962	0.970121	0.479824	0.0842292	1.01885	0.421406
100262223	46.12	5.33	3.48333	1.17667	0.09	9.33	3.52667	2.20667	0.43	0.2	2.21269	0.00238699	0.921684	0.247808	0.682777	0.810561	1.55606	0.0506004	-1.48139	0.596832
100262224	16.46	6.73667	5.75	5.10667	5.8	3.145	3.98333	4.53	8.73667	12.69	2.22729	0.00311712	1.24785	0.163136	0.352385	0.777445	-0.677486	0.0556161	-1.06159	0.163021
100262227	40.685	22.7733	12.1933	8.82333	7.12333	12.15	14.02	9.17333	12.5267	9.45333	1.62611	0.00261279	1.06333	0.115839	0.426362	0.404595	-0.414869	0.368114	-0.481263	0.266202
100262263	4.67	4.89667	8.22	11.63	9.66	14.48	9.43333	10.06	10.14	10.55	-1.76636	0.00516821	-0.713458	0.617893	-0.281337	0.557616	0.296612	0.248809	-0.0987083	0.935836
100262328	12.175	18.77	9.99667	4.45	3.97	20.455	20.96	16.5367	10.9967	6.45333	-0.923023	0.407568	0.119972	0.966949	-0.699414	0.43065	-1.20524	0.00203365	-0.819282	0.212834
100262343	0.13	0.246667	0.66	1.82667	2.55667	0.605	1.38667	1.17333	2.53	6.32667	-2.38858	0.185345	-2.05029	0.116407	-0.808715	0.222526	-0.376707	0.685923	-1.35379	3.6838e-05
100262356	94.835	198.897	157.23	52.4967	47.9633	64.66	55.42	108.263	117.727	66.48	0.361677	0.892153	2.45047	0.0244838	0.564153	0.0673618	-1.06389	2.95103e-07	-0.596162	0.323242
100262361	0.03	0.136667	0.156667	62.0667	91.9	0.985	5.27	26.3333	20.6967	13.6567	-5.32133	0.200798	-4.8658	5.45211e-08	-7.39916	3.80411e-06	1.66937	0.331223	2.77702	8.482e-08
100262364	0.44	3.15667	1.22	0.723333	0.163333	0.78	0.623333	1.57333	0.0533333	0.11	-1.10458	0.927747	2.74909	0.00691987	-0.299911	0.970121	3.79053	0.0100323	0.165214	0.963446
100262369	6.565	7.65	4.96333	11.2433	9.16667	19.815	12.2733	8.92667	5.70333	13.3833	-1.74305	0.0253457	-0.183889	0.960578	-0.814021	0.245552	1.07666	0.00061077	-0.850171	0.529333
100262403	0.97	2.84333	2.43667	35.64	20.63	2.515	9.15	9.78	15.8433	10.89	-1.51119	0.60466	-1.55641	0.601439	-1.99002	0.00523203	1.27131	6.19952e-07	0.875174	0.441128
100262406	28.085	23.3267	2.83667	2.52667	0.68	31.88	19.96	2.19333	2.58333	8.36667	-0.330621	0.951183	0.688599	0.671213	0.409614	0.946163	0.0304687	0.993204	-4.13834	0.00261935
100262451	4.515	0.396667	0.436667	0.543333	0.21	0.42	0.383333	0.38	0.18	0.36	3.28193	0.00747977	0.452577	0.947236	0.0212695	0.999362	1.4311	0.501593	-0.831651	0.775553
100262459	44.415	41.6667	34.4467	19.8333	12.7267	28.055	45.3267	36.21	46.7433	41.8	0.523638	0.606807	0.195326	0.848171	-0.0739728	0.970121	-1.13926	0.00275696	-1.66464	0.0308795
100262460	1.875	0.0566667	0.0633333	1.58667	2.61667	0.915	0.72	0.69	1.50333	0.756667	0.871626	0.81714	-3.2851	0.0278485	-3.39731	0.00277552	0.163589	0.91027	1.43137	0.335007
100262516	0.02	0.42	0.146667	0.286667	0.153333	0.175	0.66	1.06	0.596667	1.01667	-3.13598	0.714876	-0.113344	0.973999	-2.82843	0.00636965	-0.963281	0.695892	-2.95538	0.0109954
100262522	11.475	6.04333	18.2733	7.39	8.14	5.16	4.33667	7.76667	15.8	12.1533	1.04998	0.50276	0.858563	0.238427	1.26165	0.000210017	-0.991416	0.00353229	-0.499147	0.691157
100262547	55.245	33.7367	14.8533	17.27	15.3667	14.46	19.1867	24.03	43.7133	23.3733	1.81923	0.0233621	1.26079	0.124143	-0.668985	0.160711	-1.23578	1.37132e-09	-0.570232	0.385244
100262563	12.2	5.28	7.26667	2.95	2.23667	3.45	5.6	3.42333	4.6	1.99333	1.74444	0.417914	0.182911	0.953942	1.09741	0.000259533	-0.54388	0.354642	0.254545	0.911593
100262588	49.445	21.23	10.17	41.55	46.2633	25.76	32.5567	27.3167	22.0967	29.37	0.800309	0.229974	-0.0553331	0.975775	-1.41752	0.00155735	1.00736	1.58716e-06	0.572716	0.0827946
100262614	5.96	0.916667	0.226667	0.356667	0.0433333	1.145	0.78	0.223333	0.0966667	0.996667	2.28115	0.325482	0.867174	0.78637	0.0197507	0.999362	2.02345	0.554355	-5.18156	0.00928632
100262628	0.605	12.56	13.7867	4.49	3.07667	4.855	5.77	2.85333	0.776667	1.93667	-3.19247	3.11406e-05	1.47018	0.107471	2.33012	8.76175e-05	2.66721	2.22766e-09	0.223899	0.935836
100262657	199.67	89.6267	63.8067	41.5033	56.4433	71.925	54.4767	20.72	50.74	86.76	1.43408	0.516075	1.36324	0.445161	1.63301	1.16053e-14	-0.197696	0.792764	-1.01266	0.518449
100262707	221.71	88.7333	40.2267	5.48333	3.73	49.24	34.0633	37.9933	35.9333	6.28	2.00541	0.000185105	1.6422	0.206004	0.124989	0.970121	-2.58544	1.62107e-09	-0.631484	0.794152
100262718	10.25	133.017	75.6733	69.9867	61.6867	124.245	76.2067	52.22	29.9567	92.21	-3.75564	5.32902e-20	1.27039	0.0905204	0.56122	0.0956784	1.31785	1.34773e-11	-1.07484	0.590632
100262729	256.03	34.3067	4.90667	0.0633333	0.0633333	71.875	2.48333	0.606667	0.03	0	1.7916	0.418983	3.99809	9.22746e-06	3.03714	0.00563144	1.04301	0.940001	1.76718	0.904476
100262758	17.035	2.25667	2.63	7.13333	15.71	3.695	5.25	1.57	1.01	0.61	2.14042	0.0598505	-0.888538	0.84042	0.793519	0.799324	2.90712	1.5433e-05	4.58655	2.1203e-31
100262762	138.835	24.6433	23.3967	14.8267	14.8867	27.605	18.62	18.4033	18.67	14.0233	2.16759	0.0018234	0.600973	0.654792	0.374493	0.231868	-0.207146	0.576506	0.0660133	0.947168
100262772	268.27	195.61	287.493	295.83	285.667	245.395	220.333	284.487	100.83	62.7167	-0.0633112	0.980537	0.0728479	0.973999	0.0358533	0.984699	1.64801	1.10976e-07	2.24061	2.34556e-07
100262782	17.875	3.80667	1.96667	1.40667	0.85	1.795	1.93333	1.19	1.77	0.956667	3.14553	0.00182694	1.30377	0.029949	0.716958	0.538319	-0.2431	0.879461	-0.155624	0.935836
100262788	11.37	0.866667	0.786667	0.36	0.18	0.585	0.31	0.323333	0.37	0.18	4.08627	0.00310923	1.83266	0.351361	1.30295	0.627568	0.0595868	0.986771	0.133771	0.984178
100262849	43.885	1.22333	1.34667	0.623333	0.0633333	1.135	2.78667	0.613333	0.96	0.596667	5.18281	0.00356791	-0.946458	0.697616	1.1868	0.561843	-0.549574	0.897714	-3.1651	0.319486
100262872	1.595	1.09333	0.603333	2.44333	2.01667	1.405	2.21333	1.16667	0.3	0.876667	0.05782	0.991202	-0.656527	0.708545	-0.929326	0.471251	3.12344	2.29892e-08	0.986894	0.545725
100262881	422.2	950.847	1429.06	1780.83	2119.8	1661.59	1692.76	1613.83	1632.52	1175.14	-2.1111	0.000584752	-0.523152	0.524478	-0.143773	0.866266	0.226334	0.114689	0.703265	0.227538
100262888	3.22	2.62667	3.5	4.92667	7.08333	7.16	6.93667	4.33667	4.85	7.8	-1.29807	0.00862642	-0.949568	0.23851	-0.291926	0.523758	0.110959	0.89437	-0.307139	0.753251
100262963	1.085	3.76333	3.98667	0.976667	0.42	5.655	5.50667	3.04333	0.21	0.04	-2.79962	0.00238699	-0.324139	0.930373	0.368762	0.603291	2.63791	0.03958	3.35308	0.237626
100263026	6.27	7.34	4.41667	1.49	0.696667	7.985	4.31667	3.16333	3.10667	2.46333	-0.601575	0.902422	1.2005	0.0599233	0.513621	0.669968	-0.987966	0.137244	-1.96964	0.000815631
100263033	8.495	4.98	2.72	4.38333	4.45667	1.895	2.88333	3.40333	12.0467	8.63	2.08415	0.0227201	1.41674	0.384216	-0.314742	0.766426	-1.35908	3.01523e-13	-0.9207	0.109872
100263039	1.195	1.95	3.45333	12.7167	13.5767	4.165	4.15333	5.63	7.85667	13.0567	-1.92892	0.000557827	-0.620007	0.640166	-0.688843	0.00179365	0.788806	3.21865e-05	-0.112572	0.935836
100263042	31.57	10.6067	14.09	1.36667	0.546667	14.55	5.08333	4.34	1.76667	0.856667	1.12226	0.79671	1.67271	0.213176	1.71523	0.00801388	-0.264232	0.939664	-1.2168	0.736178
100263051	8.595	9.15333	1	0.416667	0.36	45.745	15.5633	6.96	1.52667	0.526667	-2.69708	0.198018	-0.188727	0.973999	-2.78211	1.30819e-12	-1.79167	0.0544858	-0.942801	0.746553
100263064	87.435	109.443	50.0167	17.3133	29.4233	31.4	53.1167	44.32	69.9767	13.4733	1.25943	0.361784	1.33911	0.131464	0.206949	0.970121	-1.91417	9.79026e-19	1.26174	0.398543
100263065	6.49	12.7933	16.4233	37.63	52.84	17.09	19.1567	21.6867	31.81	34.75	-1.52181	0.00191123	-0.247995	0.745603	-0.377948	0.128024	0.337397	0.0167465	0.537914	0.188666
100263074	11.54	4.86	7.35333	13.4767	20.8033	15.78	13.42	15.9133	13.2833	13.62	-0.642291	0.687704	-1.07055	0.0140533	-1.10488	0.000882285	0.114914	0.79551	0.68531	0.458562
100263109	42.78	3.98333	3.33667	9.68	8.31333	7.575	7.11667	12.8733	21.4233	24.7833	2.36083	4.69731e-05	-0.450454	0.77829	-1.94549	0.00469295	-1.06621	0.533441	-1.50758	0.0710302
100263116	10.715	17.2833	24.28	19.3833	29.07	15.97	22.84	27.7633	44.77	48.8333	-0.691996	0.62655	-0.0856398	0.970986	-0.170133	0.938456	-1.10857	4.89717e-08	-0.804441	0.00672766
100263160	0.275	0.18	0.253333	4.31333	0.343333	0.56	0.343333	1.68333	0.0766667	3.13	-1.24941	0.744092	-0.363003	0.970687	-2.77276	0.00643326	6.08666	0.0460433	-3.81416	0.0941614
100263174	26.595	4.51333	3.27333	1.65333	1.24	6.345	3.83333	2.25667	3.19667	2.03333	1.95462	0.00616802	0.612673	0.391112	0.542603	0.736287	-0.851302	0.0770582	-0.715169	0.339745
100263179	8.62	105.187	369.817	420.377	624.047	34.59	102.003	234.423	232.053	279.837	-2.13123	0.156474	0.609483	0.905076	0.687415	0.794719	0.965584	0.000793645	1.1524	0.00350248
100263206	1.465	0	0	0.01	0	0	0	0	0	0	7.83355	0.00238699					1.10906	0.940001
100263212	19.35	51.92	22.8033	7.85667	7.53	7.81	12.2733	12.94	19.5233	7.16667	1.14818	0.552891	2.73234	0.00904492	0.82213	0.015089	-1.21127	7.9416e-05	-0.226881	0.929533
100263252	3.76	5.24333	12.3167	47.84	32.39	22.195	26.4467	15.1367	24.17	47.7233	-2.64553	9.13855e-05	-2.1068	0.0459147	-0.274918	0.816267	1.08031	4.2275e-08	-0.760832	0.343105
100263254	32.09	0.926667	1.33	7.71333	4	5.77	3.43	3.24	2.18	3.45	2.23403	0.111122	-1.59827	0.105469	-1.30309	0.4531	1.92063	0.00433103	0.267425	0.913264
100263272	16.45	329.503	282.013	128.567	167.41	44.73	123.637	129.353	183.653	112.407	-1.57495	0.294004	1.8882	0.00335406	1.15134	0.355689	-0.416338	0.205966	0.373528	0.839626
100263275	327.96	91.65	77.4433	9.22333	7.71667	90.425	32.5933	21.5833	7.38	2.62	1.72856	0.0150306	2.027	0.0523977	1.87008	0.00036485	0.42152	0.818592	1.3145	0.233978
100263311	235.115	88.8533	78.1833	50.5933	25.5633	104.585	66.0433	37.82	63.83	113.89	1.01867	0.249147	0.886039	0.365265	1.04644	0.101341	-0.23372	0.765364	-2.2111	0.00172105
100263313	2.195	0.416667	0.95	0.99	1.32333	0.135	0.246667	0.09	0.113333	0.616667	4.04568	0.279783	1.08571	0.604831	3.40493	0.000252574	3.20601	0.00251617	1.24051	0.541624
100263322	1.59	24.6233	26.1233	3.48667	1.11333	11.275	18.9	15.5467	6.61	2.37	-2.97258	5.11156e-07	0.611113	0.728294	0.779914	0.43065	-0.833248	0.532814	-1.3557	0.457004
100263324	162.025	84.7533	63.4433	16.96	6.52	9.615	63.87	9.42667	82.56	92.1133	4.046	0.023624	0.86478	0.452269	2.73988	0.00251497	-2.19975	0.0979641	-4.07152	1.54292e-05
100263355	557.165	165.727	22.7333	19.27	7.90333	65.325	41.0533	37.4733	43.6067	38.39	3.01033	0.000248983	2.46321	0.056867	-0.699436	0.0216433	-1.0904	0.00815947	-2.17513	0.0582365
100263357	2.505	0.466667	0.16	0.69	0.0733333	0.05	0.09	0.39	0.08	0.14	5.49285	0.000798363	3.12524	0.346563	-1.22232	0.695986	3.16939	0.172	-1.34123	0.759321
100263360	15.87	10.5767	14.77	4.42	3.10333	17.185	11.4667	6.91667	5.03333	2.26667	-0.231011	0.927747	0.139664	0.970642	1.11671	0.000248809	-0.0891966	0.940001	0.327722	0.834951
100263403	1.945	2.23	4.10333	5.12667	7.64667	2.905	2.81333	3.45667	2.73	1.46333	-0.692882	0.630624	0.0258045	0.977167	0.258941	0.816596	1.00265	0.019186	2.32896	7.25909e-11
100263433	36.42	49.9367	71.63	78.27	99.91	85.01	71.7867	84.3667	53.7867	60.3933	-1.3415	0.00394661	-0.209922	0.858836	-0.214228	0.448816	0.637478	1.393e-11	0.727037	0.0301632
100263470	16.33	5.54333	3.39667	1.17	0.64	3.375	4.76667	1.44	1.82	2.04667	2.10751	0.000102896	0.502286	0.669049	1.24615	0.0201119	-0.538389	0.378671	-1.74753	0.00491739
100263489	1.765	2414.11	2647.15	2271.02	1989.86	835.04	1965.66	2452.28	1566.27	1699.66	-8.98755	2.14371e-13	0.809105	0.566015	0.14067	0.968475	0.637347	0.00561137	0.0490604	0.968172
100263493	10.12	12.7433	21.5833	28.5633	48.5533	25.585	31.9633	24.0167	24.54	50.5167	-1.48302	0.00268215	-0.911831	0.396562	-0.137021	0.948851	0.316237	0.504069	-0.0646116	0.935836
100263495	8.515	46.0333	112.153	59.27	48.7733	47.005	54.67	60.45	59.5567	40.2533	-2.53603	0.00519216	0.00407998	0.997119	0.917762	2.44337e-05	0.0932443	0.855077	0.358262	0.777074
100263533	0.89	1.74	2.39333	7.55	5.66667	0.9	2.00667	4.73333	2.96667	5.12667	-0.173049	0.961297	0.241168	0.960578	-0.973623	0.0182406	1.44515	6.90612e-06	0.178437	0.90476
100263537	137.81	982.04	231.553	61.2467	52.4033	211.99	369.19	253.057	137.603	304.627	-0.707434	0.777569	2.14684	0.200243	-0.118829	0.963393	-1.07462	0.0357235	-2.79046	0.00157786
100263541	38.505	26.8	92.13	12.77	22.4333	24.445	27.4233	39.9	34.1667	11.41	0.582536	0.865103	0.230904	0.921088	1.24565	0.00491575	-1.32299	0.000114725	1.00971	0.0409647
100263555	15.61	15.7067	10.6067	5.30333	4.95333	10.05	10.75	5.06667	8.81333	10.3167	0.591105	0.850201	1.006	0.449226	1.03809	0.00361234	-0.579905	0.197389	-1.34372	0.125068
100263565	16.11	7.64333	12.9333	11.2	12.2667	6.215	4.71	3.62	7.72667	14.39	1.3083	0.655062	1.04593	0.18185	1.81378	2.01406e-09	0.626945	0.52921	-0.284091	0.732441
100263570	0.105	0.596667	1.94667	6.72333	3.85333	0.42	0.85	2.40333	2.28	2.62667	-1.995	0.740415	-0.0951638	0.973999	-0.28628	0.936866	1.64329	0.0036016	0.626819	0.657929
100263588	265.83	202.887	41.73	40.65	4.24667	79.155	30.73	44.8433	105	82.4133	1.67908	0.412193	3.28862	0.0166172	-0.0759029	0.972656	-1.26337	0.186507	-4.1683	0.000437258
100263590	28.015	11.8	11.09	11.72	9.08	16.895	20.3733	12.8267	4.34333	3.3	0.508745	0.865812	-0.553029	0.732956	-0.183264	0.858118	1.53243	0.00322337	1.43063	0.00772888
100263614	110.03	30.3967	24.46	14.1633	14.94	25.15	28.0467	25.7833	21.15	13.67	1.96788	6.03167e-06	0.400971	0.722296	-0.0495607	0.970121	-0.487202	0.112809	0.130937	0.895547
100263626	21.515	23.5533	43.3367	14.8833	3.66333	8.22	20.9467	32.7733	28.5133	15.1767	1.2107	0.591496	0.504553	0.662843	0.395841	0.849465	-0.828504	0.283046	-2.11733	6.36062e-06
100263636	15.215	5.62333	15.6833	57.81	62.4633	17.54	23.2533	29.1133	37.0367	28.1367	-0.392443	0.861938	-1.77267	0.00251725	-0.870838	2.94237e-08	0.741452	0.0118344	1.24659	0.162539
100263637	1.125	90.1167	162.587	16.0533	1.98333	2.815	53.3167	17.4933	5.80667	3.59	-1.44778	0.582323	0.963928	0.64593	3.23828	8.0921e-10	1.58235	0.145157	-1.14717	0.667835
100263698	210.495	1.86	0.846667	0.18	0	4.025	0.61	0.153333	0.193333	0	5.50643	0.000766462	2.16021	0.150392	2.4555	0.257445	0.00365836	0.998528
100263719	8.13	26.0567	25.0733	19.3867	17.21	33.96	17.26	16.28	11.1233	14.53	-2.20682	6.284e-09	0.894458	0.218733	0.648281	0.0314413	0.896436	0.000130415	-0.0157566	0.994757
100263762	3.285	11.4067	5.89	6.98667	8.21667	5.655	3.16333	1.45667	3.36667	4.52	-0.884321	0.64666	2.16103	0.029072	2.0363	2.94237e-08	1.15313	9.0662e-05	0.568611	0.762685
100263768	98.85	96.2767	180.957	100.417	97.68	243.185	121.963	96.4167	67.23	42.8867	-1.36947	0.270878	-0.0885515	0.973999	0.937545	0.00688681	0.675517	0.0730954	1.15863	1.99715e-05
100263781	20.83	70.84	76.64	62.6533	70.4367	75.845	101.217	117.52	116.18	62.2067	-2.00554	0.000161055	-0.125587	0.960578	-0.588171	0.195317	-0.786505	2.24498e-05	0.129566	0.8585
100263786	4.695	2.84333	0.856667	6.70667	45.12	4.055	5.52333	12.4633	8.22	6.63333	-0.0521998	0.993529	-0.328417	0.960578	-3.86415	5.02623e-09	-0.208295	0.903457	2.5505	0.000296505
100263787	7.76	2.20333	3.30667	7.85667	6.11333	7.095	5.50667	6.88333	2.29	2.85	-0.0696546	0.985426	-0.789939	0.654792	-1.01917	0.0542145	1.87098	7.90097e-10	0.823555	0.514516
100263791	132.415	19.2433	0.723333	1.16	0.24	8.66	0.496667	0.89	2.14	7.53333	3.93307	0.0124071	5.76708	5.17532e-06	-0.280454	0.970121	-0.773733	0.773033	-4.79446	0.0796256
100263802	80.345	171.68	112.607	36.2067	31.8533	118.225	109.86	112.28	103.54	47.28	-0.739276	0.346253	0.907082	0.313477	0.0285381	0.98755	-1.40709	4.80942e-06	-0.61521	0.342701
100263804	31.765	21.7833	33.7833	36.34	18.69	8.19	7.27	18.3067	13.9467	12.4033	1.81252	0.570495	2.30184	0.163136	0.902686	0.77998	1.47966	0.00261018	0.269702	0.92157
100263817	1.74	3.65667	2.27667	0.93	0.666667	1.575	1.36667	2.09	1.66667	0.886667	-0.00851337	0.998188	1.77471	0.000168416	0.137892	0.970121	-0.780026	0.47752	-0.332664	0.884883
100263832	113.825	75.62	41.92	47.09	54.9533	41.89	43.91	55.1433	58.2767	46.31	1.29202	0.00698703	1.3332	0.189181	-0.375509	0.0148805	-0.213597	0.407797	0.0420631	0.97595
100263837	1.06	2.43667	7.06333	30.5367	52.3767	6.945	8.05667	19.2833	24.62	30.9267	-2.78427	0.46877	-1.31234	0.146301	-1.42862	0.00330367	0.405715	0.155063	0.856196	0.427321
100263839	0.16	0.11	0.136667	8.18333	0.696667	0.04	0.0266667	1.95	0	0.46	1.81346	0.920887	2.16115	0.853567	-3.80628	0.0244786	22.4637	7.99489e-07	0.456481	0.935836
100263865	5.77	1.56667	2.11667	3.37	1.95667	3.11	2.34667	1.87667	1.55	2.48	0.676105	0.895741	-0.292664	0.903035	0.174294	0.970121	1.20888	2.17451e-05	-0.239155	0.920169
100263879	31.36	1.18333	0.44	0.513333	0.04	1.08	3.57	0.17	0.11	0.306667	4.82757	8.23229e-05	-1.35203	0.730857	1.42459	0.701808	2.25793	0.204631	-3.16954	0.241607
100263894	4.79	16.64	35.56	97.0367	12.17	1.805	3.64667	12.87	12.2933	6.41667	1.44528	0.802019	2.62479	0.0997531	1.49251	0.743883	3.07597	1.72975e-05	0.43541	0.916202
100263949	8.965	23	53.3467	106.49	176.873	69.27	46.5633	55.2633	37.58	79.7567	-3.101	5.94256e-18	-0.616609	0.538797	-0.0259205	0.98755	1.60078	1.38627e-13	0.993377	0.0582365
100263951	56.84	34.8367	32.83	13.2067	14.1933	20.85	23.1733	28.7133	18.5867	15.4867	1.30246	0.00219896	0.964155	0.0742922	0.214367	0.558682	-0.396434	0.115589	-0.136974	0.861667
100263979	15.585	28.2533	31.28	19.82	17.57	39.035	59.32	63.7233	31.4767	21.7033	-1.4082	0.259221	-0.793912	0.262161	-1.00663	0.000824935	-0.572279	0.0857413	-0.269129	0.805223
100263992	0	5.24667	4.13333	4.4	1.91667	0.07	0.266667	1.17333	0.326667	0.206667	-3.249	0.885301	4.44612	0.000472005	1.86809	0.636655	3.82602	8.49966e-05	3.00053	0.00588479
100263995	4.215	18.9333	7.74333	2.90667	2.2	6.44	14.08	11.5367	7.56333	14.1	-0.689718	0.876644	0.773194	0.115253	-0.563631	0.791842	-1.27818	0.00402364	-2.63202	0.00119052
100263996	1.97	1.01	0.373333	0.17	0	1.25	1.58333	0.12	0.19	0.25	0.566528	0.885301	-0.31261	0.940025	1.61725	0.301102	-0.0462729	0.986771	-6.31785	0.00136159
100264000	33.875	94.7867	86.62	97.3767	73.47	152.2	145.697	152.36	89.13	87.3567	-2.31982	1.58275e-09	-0.221693	0.86118	-0.799441	0.0062809	0.225503	0.750948	-0.510133	0.71693
100264011	53.47	79.51	109.093	50.07	47.9267	65.61	109.39	49.5267	58.85	86.67	-0.427748	0.651718	0.10576	0.973999	1.16281	1.30194e-05	-0.129925	0.91749	-1.26473	0.420725
100264061	29.625	50.6067	72.1167	51.8833	37.1133	69.35	70.5967	61.37	44.57	36.3067	-1.36372	0.000100661	-0.199328	0.9121	0.250186	0.54046	0.316869	0.230261	0.000928328	0.998432
100264112	17.28	16.4167	9.95333	20.5633	16.04	17.745	13.4033	13.2767	10.73	21.4133	-0.141436	0.958143	0.894757	0.67449	-0.4094	0.451996	1.03114	1.28246e-08	-0.789312	0.62308
100264113	7.12	2.34	3.97667	7.32333	5.51333	4.135	3.45667	3.5	3.08333	3.13333	0.648756	0.764575	-0.185302	0.937641	0.197487	0.931551	1.34487	7.48206e-07	0.754335	0.11234
100264117	0.36	3.26333	1.46	1.26	0.563333	1.03	1.66	0.73	6.48	3.08667	-1.75995	0.657867	1.28354	0.387156	0.996209	0.370557	-2.25378	0.000208158	-2.46298	0.0360901
100264123	1.24	1.18	1.56667	0.596667	0.306667	1.185	1.15333	1.18333	1.66	0.923333	-0.0810792	0.982497	0.27796	0.951168	0.406892	0.815645	-1.37199	0.00715862	-1.53642	0.305843
100264154	26.035	27.7467	27.3033	6.27333	7.59333	17.525	25.9233	25.66	14.5067	11.2233	0.423981	0.758911	0.717587	0.73989	0.103658	0.941628	-1.08295	0.000470109	-0.786827	0.393791
100264173	1.315	0.18	0.376667	13.2133	0.71	1.575	0.79	3.57667	0.173333	5.13333	-0.481934	0.946345	-1.85013	0.305814	-3.26066	0.000441721	6.40842	0.0491294	-3.40928	0.133602
100264200	6.08	0.71	1.37667	0.44	0.173333	0.25	0.74	0.123333	0.29	1.39	4.50927	0.00749139	0.306388	0.960578	3.5403	0.000548208	0.684731	0.871119	-3.33428	0.041434
100264214	400.825	357.31	149.883	60.87	35.86	66.235	213.693	36.3033	182.007	406.697	2.57472	0.284802	1.34616	0.478997	2.04494	0.0728748	-1.49528	0.176396	-4.01924	0.00473948
100264239	65.42	197.32	102.27	64.0733	53.8667	455.08	141.293	84.56	34.8367	80.5133	-3.0102	0.000155683	1.02721	0.470198	0.311219	0.759032	0.975429	0.0057225	-1.17209	0.663086
100264250	15.695	17.0367	26.6167	26.39	31.3467	26.82	30.5	39.2033	98.8633	99.4833	-0.884943	0.675853	-0.423053	0.858339	-0.512442	0.673524	-1.80651	3.04484e-47	-1.71344	6.15919e-10
100264253	5.2	19.5467	40.0933	11.4067	11.7867	25.64	21.03	21.0767	25.97	30.24	-2.38591	0.00709651	0.375297	0.883649	0.97318	0.115393	-1.09266	0.324338	-1.99434	0.420725
100264271	12.34	0.326667	0.126667	0.0233333	0.11	0.03	0.0833333	0.04	0.0833333	0.103333	8.57404	0.000782223	2.71624	0.619274	1.6107	0.899751	-1.75411	0.784587	-0.106187	0.986639
100264272	30.18	13.1633	48.39	124.623	112.29	38.155	56.2767	50.9133	84.55	87.7467	-0.481903	0.756623	-1.81643	0.000385574	-0.0514585	0.970121	0.657753	0.00873702	0.262229	0.585045
100264273	1.55	1.06	0.41	4.04	2.18333	3.16	0.78	0.823333	0.76	2.34	-0.982362	0.923736	1.15504	0.78285	-1.005	0.583926	2.51074	3.40661e-05	-0.0672095	0.958579
100264279	6.17	3.76	4.59	1.42333	1.37	1.39	1.83667	3.68	4.31	2.49667	2.05562	0.198121	1.70205	0.305814	0.324295	0.845437	-1.50727	7.02103e-08	-0.959211	0.262663
100264342	7.3	3.54	1.66333	0.916667	0.666667	0.84	1.48667	1.01333	1.51333	1.78333	2.97724	1.13235e-06	1.88786	0.176204	0.739395	0.470256	-0.630044	0.472711	-1.6371	0.0606549
100264404	7.835	10.0033	8.21667	6.34333	3.05	12.07	10.7067	5.56667	2.59	2.60333	-0.728634	0.583756	0.258082	0.799098	0.583365	0.237663	1.38605	1.63743e-05	0.00782751	0.994757
100264446	18.38	12.3033	9.17	3.92333	1.24	11.16	13.3167	8.26	6.78	6.07	0.625754	0.784136	0.340504	0.83983	0.16359	0.944831	-0.697132	0.115457	-2.4344	2.32228e-06
100264482	1.47	2.49333	2.27	0.503333	0.29	1.17	2.00333	1.73333	1.48	1.30667	0.082122	0.991202	0.680333	0.656141	0.385848	0.870711	-1.45679	0.00622683	-2.28744	7.75198e-05
100264507	276.365	45.1533	31.7333	15.18	4.13	48.89	60.72	16.59	20.8567	21.75	2.37576	0.0928544	-0.0600713	0.973999	0.935404	0.00584827	-0.390361	0.907973	-2.51191	0.00234669
100264511	5.32	8.35333	9.91333	4.61667	6.42	6.785	12.6333	10.4967	13.9767	8.30667	-0.521869	0.71716	-0.363446	0.886981	-0.0705317	0.970121	-1.50131	4.57202e-05	-0.388497	0.748675
100264520	164.965	127.937	58.7933	27.7533	17.8533	74.37	95.8533	101.98	71.36	15.6733	0.939965	0.514769	0.692921	0.728998	-0.766687	0.240909	-1.26078	4.69292e-06	0.320529	0.89356
100264533	513	250.183	111.287	184.327	128.137	258.43	326.107	253.27	216.537	121.79	0.786785	0.528219	-0.00816262	0.99434	-1.16635	0.000104561	-0.131042	0.782686	0.084769	0.935836
100264552	1.09	0.896667	0.856667	1.37	1.14333	0.695	1.34	1.39	5.35333	3.53667	0.516844	0.779636	-0.0771576	0.973999	-0.68636	0.36701	-1.87012	2.39471e-11	-1.64363	2.96304e-05
100264556	67.565	11.5667	8.88	2.61333	0.55	8.485	13.8867	2.12667	2.31333	2.44	2.95171	0.183889	0.0104454	0.995303	2.07099	1.49056e-06	0.258993	0.940001	-2.37382	0.293224
100264557	138.18	13.2367	13.2967	6.42667	4.43	16.645	11.1033	9.26	6.72	2.25667	2.90713	4.99348e-15	0.557857	0.644271	0.544257	0.300291	0.0321092	0.977103	0.932889	0.123777
100264581	7.36	0.903333	1.42333	0.376667	0.51	1.095	0.686667	0.5	0.0933333	0.11	2.60473	0.000855692	1.04737	0.780632	1.52215	0.40099	2.08901	0.349387	1.75483	0.5546
100264583	32.45	14.58	13.26	6.05	3.54333	12.975	11.05	6.07667	6.86333	5.35667	1.27038	0.614049	0.744121	0.396114	1.14089	6.03164e-08	-0.0978599	0.940001	-0.869344	0.446424
100264612	17.345	8.64	5.91333	1.25667	0.836667	6.645	6.77333	2.60333	2.93667	2.41	1.31053	0.205784	0.860915	0.621298	1.19517	0.00678245	-1.1299	0.00588798	-1.94029	0.280122
100264629	9.38	7.14	5.85	14.39	9.31333	9.97	8.35	6.28333	7.42333	18.7033	-0.290521	0.902027	0.305795	0.933109	-0.115974	0.970121	1.05781	0.000129576	-1.0004	0.00587369
100264647	24.2	32.6633	2.33	0.203333	0.106667	24.905	26.32	2.45	6.16333	7.60667	-0.312899	0.951856	0.886818	0.631464	-0.0199635	0.999362	-4.85926	0.0414094	-6.65538	0.000471722
100264653	334.315	272.607	211.79	139.733	121.057	238.72	324.35	255.167	270.57	288.947	0.336602	0.799378	0.176464	0.937641	-0.254588	0.531729	-0.856574	0.000211013	-1.38404	0.00707687
100264662	46.145	2.14	2.10667	0.883333	1.37	3.815	2.39	0.423333	0.753333	1.06	3.55151	0.00194195	0.401929	0.954693	2.35692	1.62642e-06	0.32667	0.80085	0.219819	0.921974
100264675	4.295	0.48	3.1	2.93667	2.64667	1.025	0.94	1.04667	1.08333	0.626667	2.06599	0.229546	-0.460856	0.925854	1.64213	0.167666	1.55814	0.201319	2.06344	0.00752754
100264683	10.665	5.17333	1.37	0.456667	0.326667	2.305	1.52333	0.763333	0.81	1.59	2.12297	0.00561384	2.38246	0.0351258	0.854056	0.192286	-0.72077	0.386927	-2.81359	0.118323
100264703	7.905	13.1633	20.6767	19.99	16.6033	29.94	21.3333	25.7567	17.9833	9.13	-2.06246	2.01383e-05	-0.465267	0.842455	-0.296644	0.428279	0.249799	0.552723	0.883262	0.120056
100264738	2.69	2800.72	1280.92	380.767	159.03	454.82	655.057	570.65	69.86	710.693	-7.63085	3.28257e-13	2.61834	0.000462505	1.22109	0.352189	2.54821	0.103469	-2.83992	0.537029
100264747	0.01	0	0	3.98667	0.553333	0.165	0	1.01667	0.0666667	0.14	-4.01896	0.693483			-7.93746	2.02191e-06	5.96947	0.361772	2.13102	0.680803
100264754	10.065	70.8133	91.6267	95.49	85.4133	83.065	84.37	83.63	67.72	79.9667	-3.1375	0.00615436	0.158521	0.95621	0.156917	0.840312	0.59455	9.9897e-05	-0.0702953	0.937524
100264773	33.025	44.1267	17.1867	8.42333	9.10333	9.755	31.1767	13.48	29.9567	23.5067	1.70799	0.383241	0.873501	0.237891	0.356454	0.869499	-1.74716	0.00167552	-1.59343	0.033126
100264774	0.42	0.203333	0.01	2.06667	0.306667	3.155	0.373333	0.676667	0.0333333	0.28	-3.07498	0.27087	-0.310263	0.965025	-5.80178	0.00437311	6.0175	0.342257	-0.370318	0.942648
100264783	2.94	2.07667	0.586667	0.73	0.146667	1.96	2.03667	0.473333	1.11	2.27667	0.339464	0.946345	0.371845	0.908421	0.299158	0.970121	-0.510938	0.839946	-3.94102	0.000393921
100264790	0.24	1.66333	2.80333	17.7333	35.01	1.81	2.61667	9	20.22	27.79	-3.09823	0.135931	-0.206492	0.960578	-1.66122	0.00663335	-0.0923483	0.921373	0.32673	0.569226
100264828	206.165	150.633	36.1333	16.3633	8.49	60.56	143.473	112.07	98.3833	20.2267	1.50109	0.416143	0.374471	0.883342	-1.60604	0.301648	-2.47754	1.37673e-07	-1.09494	0.489052
100264834	5.525	4.40333	31.2633	43.53	44.5767	4.68	13.48	28.3367	17.39	21.89	0.052123	0.992111	-1.30779	0.4488	0.161394	0.956531	1.42213	7.8602e-10	1.15995	0.359715
100264844	0.555	0.276667	0.19	9.45667	0.673333	1.22	0.473333	2.51	0.0866667	3.22	-1.39328	0.810628	-0.139194	0.973999	-3.78106	1.91983e-05	7.02547	0.0926576	-2.80244	0.164557
100264875	0.1	0.0866667	0.0433333	0.0466667	0.0133333	0.105	0.08	0.08	0.546667	0.763333	-0.130328	0.991561	0.410478	0.960578	-0.754081	0.970121	-3.41533	0.019264	-5.87219	0.00181092
100264878	58.885	10.78	13.0633	52.21	47.39	48.375	61.15	50.23	31.1933	25.0533	0.230811	0.955254	-2.15571	0.000700201	-1.90526	7.44972e-05	0.83791	0.0297117	0.774901	0.233158
100264918	14.26	9.38	10.6633	11.1333	19.42	15.64	14.8433	10.24	8.18	8.23333	-0.274876	0.812895	-0.397668	0.816373	0.0774746	0.970121	0.53793	0.0161265	1.20067	3.13071e-06
100264963	44.095	0.46	0.156667	0.106667	0.0166667	2.925	0.446667	0.133333	0.05	0.0333333	3.81363	2.05527e-07	0.396853	0.93153	0.201255	0.979921	1.14608	0.820819	-0.779037	0.941643
100264965	6.89	5.86667	6.41667	7.8	7.98667	10.935	7.74333	6.19333	4.27667	3.65667	-0.789373	0.431002	-0.0891407	0.973999	0.0609477	0.970121	0.962697	0.000578174	1.09873	0.00186309
100264992	0.295	3.41	4.88	4.00667	1.35	10.575	6.87	7.82	7.45	1.27667	-5.23431	2.15679e-05	-0.751686	0.611931	-0.662268	0.62599	-0.795451	0.386628	0.0363502	0.988216
100264999	1.025	9.29333	8.47667	9.51667	8.04667	8.14	10.6167	8.92333	7.43667	11.93	-3.1305	3.57493e-08	0.191488	0.933342	-0.0597125	0.970121	0.449465	0.0761819	-0.953788	0.543051
100265013	41.225	76.6167	110.303	101.55	131.783	146.805	89.94	71.4967	54.5	55.1033	-1.95835	4.03569e-06	0.0202752	0.987369	0.66284	0.180811	0.997191	1.18257e-08	1.11341	0.0167889
100265017	5.22	4.24667	7.45	6.59333	2.1	4.795	7.24	2.99667	7.72	7.63333	0.0376649	0.992111	-0.488262	0.802905	1.31209	0.0334664	-0.134369	0.907118	-1.93374	0.00105952
100265026	1.36	2.34667	5.71	3.59667	4.94667	0.56	2.26667	1.63667	0.61	7.17	1.04243	0.843814	0.370092	0.960578	1.84206	0.0271225	2.63632	0.00673061	-0.987857	0.645391
100265028	0.325	8.57333	0.246667	4.39	0.496667	2.835	0.25	1.61	0.463333	0.443333	-3.38767	0.170441	5.60024	1.61556e-11	-2.66985	0.00437311	3.28967	0.303223	-0.283509	0.945747
100265045	3.095	4.19333	6.18667	17.3933	22.41	7.125	10.78	11.6633	15.6133	13.2533	-1.36703	0.165303	-1.03522	0.00373739	-0.890099	0.00104259	0.252504	0.248266	0.72151	0.0266964
100265051	3.71	1.96333	0.993333	0.283333	0.333333	1.58	0.886667	0.206667	0.103333	0.61	1.14663	0.476423	1.59609	0.198805	2.29468	0.00203798	1.55266	0.314225	-1.4749	0.680052
100265052	561.525	151.613	117.817	83.4033	42.09	199.22	154.247	127.443	114.313	100.597	1.35169	0.000330333	0.427353	0.736837	-0.0980444	0.970121	-0.355532	0.452659	-1.34582	7.94989e-05
100265076	11.215	63.63	134.973	77.0067	51.8733	110.57	79.8767	88.7333	96.78	50.0833	-3.39679	9.94163e-08	-0.0726183	0.973999	0.636802	0.0176196	-0.230395	0.766087	-0.112612	0.935836
100265082	40.44	28.2133	15.93	4.17667	4.37333	18.925	14.6933	9.75667	8.24	10.1133	0.941394	0.231662	1.36232	0.0364259	0.724198	0.0414138	-0.887201	0.00623049	-1.34228	0.00426394
100265103	8.785	73.6133	53.9233	11.7767	4.04	5.87	12.5367	6.95333	21.6367	29.7933	0.490837	0.917698	2.82989	3.10053e-06	3.00274	0.00750457	-0.789068	0.232912	-2.77672	0.0016248
100265187	6.735	4.77	3.7	2.54	0.78	4.05	4.00333	3.33	3.27	2.6	0.594667	0.689737	0.57942	0.262172	0.168344	0.950865	-0.268179	0.821867	-1.77018	0.00062978
100265188	89.58	81.5833	11.4467	6.74333	8.71	99.85	140.72	42.6667	19.0567	14.0967	-0.368626	0.927747	-0.32616	0.908421	-1.85526	0.000380435	-1.41942	0.0453389	-1.10425	0.528087
100265200	13.31	0.123333	0.15	0.216667	0.27	1.345	0.25	0.13	0.0333333	0.18	3.2515	0.00435324	-0.612343	0.926507	0.182748	0.989394	2.85189	0.347518	0.314187	0.935836
100265219	0.19	1.98	3.89667	1.05667	1.05667	0.81	2.43	3.23	2.75333	1.99333	-2.20985	0.607683	0.23922	0.960578	0.292992	0.915722	-1.28754	0.00144431	-0.869073	0.400063
100265247	117.91	46.84	17.0767	7.91333	8.30333	88.925	64.2667	38.35	21.7267	5.36	0.290013	0.802613	0.140288	0.973999	-1.22298	0.337616	-1.41526	0.00097693	0.545376	0.663179
100265253	32.125	19.56	31.57	63.9733	48.0733	47.015	37.22	36.0467	29.8033	38.3833	-0.695528	0.204752	-0.613093	0.366108	-0.172491	0.716321	1.19532	3.18207e-15	0.342962	0.622074
100265260	0.05	178.397	193.49	174.94	151.093	64.535	144.383	181.903	118.05	124.527	-10.6748	1.09545e-12	0.82378	0.572091	0.114923	0.970121	0.666357	0.0129631	0.0953467	0.935836
100265304	9.675	0	0.04	0	0	0.425	0.406667	0	0.02	0	4.4763	0.00394605	-4.63998	0.453453	1.90301	0.970121	-0.814489	0.940001
100265311	17.325	18.4633	20.66	30.3867	29.3833	38.875	31.5133	23.56	24.1967	25.86	-1.29685	0.0029921	-0.390762	0.703599	-0.178559	0.770753	0.427618	0.0833109	0.00346326	0.996992
100265313	114.66	55.8833	90.66	42.29	21.5367	48.415	68.05	26.3933	37.6667	52.0433	1.20669	0.706765	0.0751371	0.973999	1.794	1.30194e-05	0.261676	0.928631	-1.36206	0.233036
100265354	1.86	1.18	0.103333	0.0166667	0.0333333	0.555	0.133333	0	0.0133333	0.03	1.61745	0.689737	3.47562	0.0011178	3.6979	0.530997	0.147292	0.986771	-0.177551	0.984631
100265355	2.175	0.813333	1.40667	5.44	2.69667	2.715	2.55	2.04333	2.59	7.70333	-0.446287	0.888549	-1.12033	0.557843	-0.513639	0.709649	1.16627	0.00762734	-2.0735	0.26889
100265360	19.38	5.7	5.88667	0.93	0.903333	5.345	3.49	2.16	2.44	0.733333	1.76188	0.0627502	1.01884	0.209685	1.48864	5.57051e-05	-1.34117	0.00500997	0.212059	0.904476
100265368	0.29	0	0.0333333	1.48667	0.0333333	0	0	0.0333333	0	0.05	4.7998	0.564144			0.0242016	0.999362	7.43806	0.00181996	-0.652035	0.935836
100265390	2.39	2.06333	1.49	1.06	0.376667	1.37	2.15667	2.22	1.97	3.24333	0.61603	0.885685	0.426493	0.908813	-0.572215	0.808918	-0.789249	0.553744	-3.27839	3.34304e-05
100265432	0.02	0.0133333	0.0133333	0.206667	0.0266667	0	0.07	0.04	0.226667	1.60333	1.37875	0.946345	-1.70083	0.874023	-1.4529	0.970121	-0.0487697	0.989935	-5.62308	0.00661517
100265489	12.3	13.88	9.37667	2.31667	1.57	10.585	10.9667	5.10667	5.21333	4.51333	0.0913093	0.946345	0.561587	0.73757	0.873242	0.0511531	-1.074	0.00188392	-1.48612	0.106799
100265499	4.29	2.57333	7.58	12.8433	16.9933	6.96	9.34333	7.35	8.21333	15.0733	-0.814325	0.628717	-1.56517	0.00491602	0.0635409	0.970121	0.730875	0.000510504	0.124405	0.846431
100265508	136.345	110.603	65.8933	211.313	165.92	200.255	199.497	184.967	124.763	108.27	-0.730564	0.444979	-0.551768	0.686995	-1.46487	1.77815e-08	0.854799	4.87345e-05	0.693074	0.448501
100265516	2.825	18.62	12.26	4.31	0.863333	16.97	9.15667	2.42667	0.513333	0.726667	-2.65454	0.00538292	1.22713	0.426469	2.34407	2.09819e-05	3.16364	6.04786e-05	0.0350169	0.993299
100265533	101.815	57.25	91.96	41.2	20.44	57.64	81.6833	39.8	61.1033	61.8233	0.772768	0.892153	-0.180315	0.918304	1.22138	0.00279013	-0.477349	0.786695	-1.63855	0.00075599
100265535	0.01	1.17333	2.20333	2.14	1.39333	0.98	1.68667	2.12	0.81	1.21	-6.53882	6.08707e-05	-0.0702341	0.973999	0.0834469	0.970121	1.49127	1.58716e-06	-0.45351	0.930118
100265548	8.69	7.94667	12.3067	20.1	32.92	22.355	21.5067	15.19	9.10333	17.3833	-1.482	0.00416247	-1.17677	0.130444	-0.289732	0.870779	1.23303	0.000334992	0.949564	0.0455437
100265553	9.225	3.92667	3.10333	2.97333	9.12667	9.875	6.17333	5.66333	7.30333	5.33	-0.217525	0.926237	-0.218107	0.950743	-0.832768	0.293916	-1.20241	0.00383623	0.745346	0.400063
100265575	24.345	3.33667	3.53667	1.57667	0.553333	4.35	5.42	3.06	3.12333	1.61	2.32067	7.20474e-05	-0.29038	0.885278	0.226707	0.807585	-0.88268	0.0502752	-1.85354	0.153637
100265586	12.315	3.69	2.09667	1.61667	0.366667	3.465	4.13667	1.96	2.88667	4.00333	1.77377	0.161506	0.498404	0.913555	0.0950488	0.970121	-0.748839	0.299212	-3.68915	2.58162e-06
100265597	2.015	6.94	13.1733	35.11	32.7767	10.8	16	22.8433	19.32	10.3433	-2.59351	0.00153013	-0.89348	0.156598	-0.772481	0.0511941	0.965724	0.00316951	1.62426	5.01816e-05
100265615	15.245	1.33	0.29	0.156667	0.0333333	1.325	0.393333	0.283333	0.183333	0.426667	3.4114	0.00986609	2.17069	0.0377227	0.0426951	0.999362	-0.145102	0.967523	-4.04272	0.143255
100265620	188.925	24.2767	21.0567	5.05333	4.4	42.98	33.33	31.9733	14.0433	6.28333	1.85259	0.4255	-0.1863	0.960578	-0.584458	0.501308	-1.38317	0.00185708	-0.502322	0.725704
100265651	337.855	318.537	89.7067	128.09	171.863	124.005	180.997	192.69	171.293	204.677	1.3106	0.376847	1.43469	0.3298	-1.08641	4.94852e-06	-0.327534	0.223346	-0.548155	0.697758
100265661	47.645	33.3167	9.28	1.76333	1.34667	30.89	38.0733	53.6167	25.6	2.75333	0.465496	0.892153	0.176526	0.921088	-2.50673	2.63827e-07	-3.77956	1.56832e-06	-0.922004	0.535166
100265691	12.11	4.67667	14.4067	28.99	27.0067	11.675	16.83	20.8467	18.41	25.7133	-0.182145	0.955254	-1.55138	0.0077438	-0.521133	0.331281	0.756579	0.00335493	0.130642	0.934709
100265697	6.595	7.9	8.15667	22.9333	25.8767	16.365	12.3867	15.6267	7.56	7.87	-1.3979	0.327367	-0.110364	0.973999	-0.898775	0.122268	1.70082	1.80249e-11	1.43457	0.123925
100265708	172.4	342.863	11.2367	9.64667	7.55667	15.2	14.5233	20.92	48.31	36.3333	3.44354	1.83131e-05	5.36745	0.0191157	-0.891542	0.0403075	-2.23231	3.21297e-10	-2.69589	0.0186209
100265712	18.06	48.6867	9.39667	6.33667	13.7867	3.325	25.98	17.7133	50.6633	23.2933	2.18684	0.316685	1.23005	0.347147	-0.900961	0.867109	-2.91042	1.08959e-15	-0.797628	0.154956
100265715	5.46	5.3	4.71333	3.58	2.05	3.985	4.97333	4.98333	6.98	5.35667	0.253215	0.946345	0.407584	0.740286	-0.0425331	0.985038	-0.863006	0.000146214	-1.37704	0.00124503
100265737	14.9	6.48	11.0933	14.6433	17.1567	7.66	9.45667	9.99	26.7833	55.78	0.859157	0.376499	-0.0426363	0.977413	0.160497	0.95924	-0.778759	0.158298	-1.67142	2.33263e-05
100265746	8.185	5.79667	4.45667	3.56667	1.91333	5.275	4.80333	4.24333	2.96	4.46667	0.403608	0.9285	0.699129	0.431084	0.0816988	0.970121	0.36214	0.591644	-1.34497	0.00496922
100265761	30.365	15.2033	26.8167	56.89	62.2	31.795	32.7833	38.1933	23.4133	12.21	-0.224741	0.92452	-0.755618	0.295311	-0.481958	0.596721	1.37077	0.000312905	1.92515	0.163324
100265777	2.55	1.93	1.06	1.96667	1.24	1.175	1.42	1.23667	3.46	8.00667	0.856005	0.866545	0.910549	0.496831	-0.221511	0.970121	-0.723281	0.321951	-2.57384	0.00366816
100265816	61.37	66.9333	157.793	170.93	212.57	93.57	149.633	166.653	160.357	75.68	-0.765343	0.258301	-0.910601	0.410201	-0.0560084	0.970606	0.190173	0.57949	1.43468	1.80153e-08
100265829	109.245	62.4267	106.957	125.53	128.927	92.015	82.98	89.11	73.3	57.2833	0.103487	0.946345	-0.108141	0.960578	0.288546	0.17407	0.876666	1.24652e-09	1.09041	0.000245352
100265834	4.595	2.53333	2.19667	7.92667	5.46667	3.56	3.50333	1.98333	1.82667	2.88333	0.155723	0.96135	-0.13634	0.960578	0.163364	0.970121	2.21335	6.85713e-14	0.759	0.295692
100265876	0.945	2.48	3.05333	21.5367	21.47	4.605	2.60667	3.18667	4.5	18.52	-2.38243	0.00722581	0.58991	0.907893	-0.0498253	0.992811	2.34789	2.18521e-10	0.103023	0.926693
100265907	22.26	27.2533	16.1	5.61	3.65333	21.235	10.6333	14.2667	7.28333	4.43333	-0.103358	0.96105	1.72092	1.65099e-08	0.19313	0.963623	-0.283363	0.653922	-0.450499	0.636124
100265942	1.86	1.67333	0.836667	1.34667	1.66	0.87	0.823333	2.43667	2.68333	1.89333	0.909103	0.740526	1.64599	0.344988	-1.52933	0.00291228	-0.900182	0.0194744	-0.206712	0.892155
100265988	51.52	580.587	505.583	396.69	208.87	700.125	472.953	364.023	217.687	243.767	-3.83532	0.000376756	0.688075	0.165044	0.503678	0.267857	0.963097	0.000132929	-0.659386	0.761384
100265990	0.205	0.516667	0.906667	2.75	43.0533	0.69	1.32333	1.30333	0.49	4.85667	-1.91229	0.564176	-1.09542	0.447926	-0.510078	0.866768	2.64606	0.000144223	2.80068	0.00570383
100266006	0.245	0.143333	1.21333	4.72	10.1967	0.415	1.77667	6.25	14.3833	29.09	-0.844993	0.931035	-3.30696	0.0011178	-2.38682	0.00327315	-1.50286	0.00511491	-1.34808	0.433058
100266028	1935.81	587.163	188.257	202.88	21.1767	1000.88	125.057	47.48	10.29	7.52	0.938214	0.793124	2.46989	0.000125391	2.00584	0.182133	4.38205	0.0077587	1.33146	0.14627
100266034	4.9	1.16667	1.07667	0.686667	0.683333	1.89	1.75667	1.16	1.67333	0.863333	1.23842	0.0287884	-0.210835	0.923299	-0.0891406	0.970121	-1.20015	0.00245039	-0.418648	0.627325
100266045	31.565	6.78667	5.64667	1.86333	3.04	64.98	13.3267	9.46667	4.90333	3.00333	-1.12061	0.755492	-0.603253	0.808515	-0.741976	0.632154	-1.29712	0.00306952	-0.212224	0.935113
100266086	5.315	0.203333	0.343333	0.606667	0.483333	0.535	0.556667	0.363333	0.57	0.66	3.25276	0.00335705	-1.07045	0.550697	-0.071317	0.989394	0.19624	0.933698	-0.417401	0.815824
100266095	0	0	0	1.25	0.16	0.04	0.0266667	0	0	0.143333	-2.66204	0.917698	-1.32872	0.960578			7.42139	0.00129549	0.204032	0.954455
100266131	7.755	2.85	1.66333	0.876667	0.503333	0.74	1.56667	0.653333	1.36333	2.03667	3.30009	0.0765006	1.15391	0.105162	1.35789	0.00606063	-0.557267	0.788078	-2.29366	0.00565833
100266145	7.585	5.68	6.44667	4.49	2.12	6.015	5.66	6.16333	5.93667	4.62333	0.196569	0.923736	0.377899	0.642721	0.0813449	0.970121	-0.307858	0.388752	-1.19127	0.00377467
100266147	8.135	2.49	1.81333	1.30667	0.993333	2.235	3.03	1.80667	1.99	1.43667	1.70185	0.00263964	-0.034007	0.978349	0.0599076	0.975313	-0.530929	0.401595	-0.59745	0.435678
100266206	9.37	3.35	7.16	4.17667	3.44	6.62	3.41	2.95667	2.85667	1.41	0.389117	0.818111	0.167596	0.973999	1.28784	0.00755086	0.647428	0.151313	1.27909	0.00830827
100266215	13.99	6.98333	3.32667	8.73333	9.29667	13.655	31.5567	14.37	25.6067	6.55333	-0.0410223	0.993529	-1.68854	0.0724478	-2.11766	0.00299775	-1.46107	0.0109824	0.39017	0.771892
100266256	277.84	240.4	217.567	66.1733	63.0333	99.35	170.947	130.743	171.267	188.107	1.43306	0.52236	0.91378	0.229779	0.750772	8.45372e-08	-1.28443	0.000282423	-1.77464	0.00268673
100266263	54.18	19.0633	23.8667	15.0867	11.2433	14.6	15.9633	18.8867	50.9633	30.4467	1.81064	0.0388765	0.602493	0.15157	0.357853	0.651189	-1.65865	6.69429e-13	-1.30973	0.233978
100266268	9.52	0.18	0.293333	0.54	0.0533333	0.11	0.123333	0.656667	0.0233333	0.146667	6.19663	0.00872648	0.721919	0.960578	-1.16782	0.921295	4.42532	0.22948	-1.92281	0.734168
100266306	22.595	5.14	13.8567	2.92667	1.88	3.075	5.84	9.17	4.08333	3.66333	2.74214	4.4295e-08	0.265799	0.925934	0.602018	0.477843	-0.397033	0.840431	-1.308	0.354852
100266310	13.255	16.7233	26.79	46.5633	18.9133	15.295	13.4767	18.0333	18.6567	16.25	-0.36454	0.837979	0.552111	0.750766	0.594076	0.743583	1.41834	9.5023e-06	0.284237	0.827139
100266322	7.975	2.62667	3.47333	1.87	1.33333	2.8	3.71667	2.68	5.34333	2.29	1.40812	0.214327	-0.249757	0.950889	0.396639	0.681306	-1.4186	0.00360925	-0.749699	0.436599
100266341	0.165	7.36667	7.9	6.26667	5.16667	0.63	3.60333	3.39667	20.1067	18.8867	-2.05788	0.594837	1.41642	0.436941	1.21123	0.399366	-1.57417	0.00213693	-1.8482	0.0504338
100266384	12.19	23.02	5.98667	2.77333	1.48	8.01	4.92333	3.1	1.05	6.20667	0.4304	0.871583	2.89132	0.00845009	0.972649	0.843351	1.51196	0.0497435	-2.74174	0.305609
100266386	0.29	0.583333	2.06667	0.79	1.27667	1.245	2	1.50667	1.92	0.943333	-2.23647	0.150279	-1.4357	0.00552368	0.456463	0.6341	-1.1882	0.000689823	0.354101	0.805673
100266391	14.395	0.496667	0.26	0.0433333	0.0566667	0.22	0.283333	0.173333	0.12	0.223333	5.94422	1.53517e-06	1.17091	0.559412	0.66301	0.883706	-1.43364	0.643523	-2.09	0.240148
100266396	2.755	10.0433	24.27	32.4067	52.9733	12.14	13.5467	23.73	16.5333	26.2867	-2.36373	0.0699409	-0.149648	0.960578	0.0636591	0.976333	1.06484	4.70345e-05	1.13049	0.39411
100266400	18.29	2.42	2.45	3.01333	1.63667	4.245	6.12667	7.23333	3.84333	2.24333	1.95165	0.000422954	-1.09567	0.402532	-1.55165	0.00179365	-0.262668	0.869283	-0.400545	0.837489
100266415	0	14.52	15.8667	39.85	31.0533	30.16	39.8767	71.1167	33.5033	26.9867	-11.2667	6.30375e-09	-0.985462	0.688541	-2.13133	1.98457e-08	0.339742	0.72354	-0.278295	0.935836
100266419	13.11	12.21	18.4333	13.0567	14.5267	6.39	10.2033	27.4333	37.2733	19.5533	0.880793	0.821218	0.968506	0.763196	-0.575676	0.687012	-1.40833	0.000124725	-0.513347	0.46137
100266440	18.56	12.2867	6.42667	5.50333	1.65333	11.21	16.1733	8.61333	5.62333	4.98667	0.48953	0.906847	0.0567044	0.973999	-0.412817	0.532194	0.0685304	0.945344	-1.58136	0.00590069
100266451	105.67	104.75	26.1733	26.14	16.83	43.72	56.52	60.4667	49.6233	17.2	1.05555	0.586106	1.34616	0.108096	-1.18006	0.00907947	-0.823371	0.0124082	-0.053623	0.941843
100266454	13.305	28.6833	34.5467	43.3967	61.2667	36.035	33.47	37.7367	35.93	47.3933	-1.70239	0.0080927	0.215191	0.916102	-0.121126	0.948793	0.387714	0.175171	0.215057	0.854378
100266471	95.555	24.2667	24.2367	19.75	21.04	22.895	22.8967	25.99	52.56	25.9467	1.92097	3.11401e-05	0.380302	0.759207	-0.0937158	0.970121	-1.31577	4.68997e-07	-0.184617	0.935836
100266479	15.18	0.89	0.326667	0.173333	0.0266667	1.05	0.686667	0.166667	0.19	0.323333	3.63352	0.00753331	0.735778	0.740443	1.04327	0.774657	-0.232579	0.940001	-4.50107	0.0897354
100266481	9.795	4.55	5.84667	23.6567	28.9933	6.475	9.50667	17.2033	20.23	20.9767	0.459341	0.794124	-0.679236	0.348909	-1.55096	0.00258091	0.326519	0.432012	0.483049	0.366906
100266517	15.3	10.4067	6.40333	9.26667	5.43	14.96	7.85333	6.61	4.66333	5.32	-0.0889592	0.977129	0.854383	0.351399	-0.0356352	0.997687	1.08985	0.00698425	-0.190954	0.91395
100266530	2.645	4.81	5.74	7.98	7.04	2.94	3.51667	3.44	3.99333	2.73	-0.336763	0.906446	0.663105	0.733525	0.764204	0.122328	1.09612	1.3938e-06	1.32032	0.00123864
100266585	28.975	11.2433	14.2567	8.40333	11.9	21.335	21.4567	16.3433	7.91333	3.3	0.280042	0.867089	-0.663636	0.494356	-0.171561	0.934582	0.182444	0.798897	1.7188	0.000548892
100266605	34.58	32.8967	23.66	13.9567	8.22667	15.09	22.7567	6.90667	32.5467	32.1033	1.10346	0.209726	0.886482	0.44523	1.77944	3.12926e-06	-1.12697	1.76518e-06	-2.35536	0.0932528
100266622	2.05	4.01667	7.01667	17.7833	26.05	8.52	6.93667	7.23	16.9267	19.5833	-2.2291	0.00425893	-0.495195	0.692667	-0.0175236	0.999362	0.170162	0.821495	0.370564	0.212302
100266640	0.08	0.103333	0.486667	4.94667	6.42333	0.325	0.99	2.75	2.94333	2.68667	-2.0697	0.807736	-2.84942	0.109597	-2.47262	0.000871515	0.849766	0.123029	1.27443	0.0584913
100266643	0.025	0	0	1.25333	3.22	0	0	0	0.103333	1.84	1.37875	0.946345					3.72261	0.00213084	0.641818	0.856569
100266652	1.465	0.373333	0.41	0.633333	1.41	0.33	0.44	0.473333	3.16667	2.97	2.07338	0.328189	0.0921712	0.973999	-0.168667	0.972989	-2.21969	2.05387e-05	-0.969785	0.444099
100266668	225.1	451.73	472.1	581.843	404.523	526.595	524.54	508.297	374.197	301.047	-1.35765	0.00623688	0.253242	0.908421	-0.0881842	0.970121	0.734259	1.92324e-05	0.207821	0.904476
100266675	5.63	1.99	0.483333	0.243333	0.0333333	5.565	0.29	0.243333	0	0.153333	-0.0967718	0.991202	3.12166	3.08908e-06	0.990256	0.843438	5.38769	0.138038	-2.77633	0.561305
100266686	5.05	3.91333	3.36	2.65667	1.03333	3.435	3.47667	3.10667	4.16667	3.35333	0.437618	0.771039	0.696585	0.680804	0.129903	0.970121	-0.548301	0.411939	-1.90638	0.00728983
100266698	0.65	0.226667	0.06	1.34	0.636667	0.075	0.0833333	0.0566667	0.23	0.433333	3.12113	0.405889	2.0984	0.649373	0.0477003	0.999362	2.64814	0.00015853	0.422791	0.859397
100266705	5.83	11.29	21.3867	7.67667	4.91667	5.45	10.6567	13.79	16.35	17.2067	-0.0475463	0.993529	0.53828	0.823326	0.627807	0.481712	-0.980288	0.18409	-1.86801	3.10594e-07
100266706	24.095	103.597	80.2967	141.193	173.853	61.865	79.6133	120.247	110.61	183.517	-1.49213	0.00972822	1.05456	0.640962	-0.561609	0.0530473	0.450545	0.0239796	-0.353237	0.838952
100266707	78.27	108.333	57.1267	18.7167	16.9767	49.36	79.1367	66.7	88.6867	15.5967	0.536195	0.525887	0.73327	0.44523	-0.200364	0.970121	-2.15118	7.52067e-06	0.0938768	0.93816
100266738	3.815	0.03	0.0133333	0	0	0.255	0.0133333	0.0133333	0	0	3.74903	0.00662338	1.56238	0.937641	0.0401541	0.999362
100266747	37.645	24.42	11.81	3.92	1.92667	2.17	53.37	5.96667	50.29	44.9767	4.04931	0.0156818	-0.770569	0.607638	0.970738	0.832155	-3.59516	0.000316418	-4.77797	6.19837e-06
100266751	34.445	8.64	10.02	3.42	4.30333	9.38	4.02667	3.36	2.31333	1.32333	1.73927	0.00238558	1.45231	0.0613534	1.60251	0.0199403	0.663424	0.489024	1.49748	0.15992
100266792	12.975	19.1833	22.3367	24.0367	26.4567	31.67	30.7667	31.0367	17.0733	10.8367	-1.42538	0.0705338	-0.40939	0.77851	-0.447847	0.165339	0.592202	0.0275902	1.20785	0.000443419
100266813	2.025	2.50333	7.48	27.46	26.4967	20.44	16.87	17.18	27.96	37.3133	-3.49474	1.16763e-10	-2.49401	0.00542336	-1.1861	0.000161916	0.05767	0.940001	-0.610205	0.283603
100266843	0.07	0.3	0.473333	2.91	5.42667	0.49	1.38667	2.47333	3.15333	2.51333	-2.98874	0.32027	-1.83262	0.0637892	-2.35526	0.000122224	-0.0223286	0.985639	0.955571	0.146685
100266853	7.66	7.83333	13.43	10.0267	12.8033	10.385	12.0133	15.0933	9.93667	4.13667	-0.545017	0.802143	-0.400761	0.909319	-0.142405	0.949789	0.1089	0.925802	1.66931	0.000831904
100266865	12.565	6.74667	1.23	0.17	0.1	1.12	1.27333	0.636667	0.85	0.48	3.30144	0.0726217	2.96936	0.000677246	0.957619	0.538079	-2.23088	0.0699544	-2.72434	0.183529
100266896	0.705	0.113333	0.193333	0.303333	0.683333	0.875	1.43333	1.41	1.03333	3.08	-0.307097	0.952257	-3.19227	0.10435	-2.90968	0.0015483	-1.68789	0.173716	-2.65386	0.11962
100266902	26.74	0.0833333	0.0633333	0.0633333	0.17	0.06	0.02	0.04	0.08	0.19	8.59942	6.47737e-10	2.15568	0.909429	0.640493	0.976302	-0.255659	0.977722	-0.0199633	0.996234
100266912	97.685	1.92	0.833333	0.61	0.316667	7.265	2.23	0.81	1.03	1.57333	3.58279	2.86434e-08	0.18999	0.960578	0.0459483	0.999362	-0.661404	0.36076	-2.36153	0.000753549
100266999	3.81	3.37333	2.90333	0.73	0.716667	1.8	1.75333	1.89333	1.79667	0.783333	0.940115	0.541182	1.34547	0.00833262	0.63155	0.159845	-1.20572	7.9416e-05	-0.117181	0.935836
100267022	35.77	35.3933	18.7267	17.1667	7.69333	11.9	12.2933	14.03	8.53667	21.2967	1.46972	0.166092	2.21462	0.105443	0.435193	0.6937	1.09753	0.00651039	-1.94474	0.185431
100267039	14.45	18.1133	12.5933	19.8333	20.3233	20.11	27.1467	31.4133	24.6133	31.46	-0.652843	0.743897	-0.0943384	0.973999	-1.28447	5.91586e-08	-0.209509	0.506702	-0.644965	0.232051
100267073	1.305	10.4267	0.9	4.60667	12.8667	8.01	4.56	4.14667	8.56667	12.9867	-2.66886	0.0750277	1.82791	0.353582	-2.17204	0.00187818	-0.796216	0.515651	-0.561975	0.878457
100267121	6.89	19.4933	18.4267	3.22333	1.08	9.25	10.4067	6.14333	4.34667	5.24	-0.51032	0.931035	1.48979	0.216314	1.59572	1.60542e-07	-0.34439	0.743962	-2.68473	0.0306926
100267124	99.465	7.43333	4.87667	2.01	1.10333	12.57	5.24667	1.86333	1.35667	0.79	2.84896	0.00107836	0.752398	0.491529	1.39152	0.0990898	0.669302	0.333032	0.364712	0.830392
100267145	0	0	0	4.9	1.07	0	0	0.7	0.0233333	0.0366667					-6.63832	0.00244834	7.68953	0.163308	4.98222	0.201228
100267164	2.55	7.12	2.65333	0.856667	1.85333	3.125	3.23333	1.65	2.71667	0.303333	-0.509563	0.919167	1.40152	0.214954	0.701373	0.658594	-1.56616	0.00572171	2.59879	0.012623
100267185	11.245	0.0866667	0.0533333	0.0233333	0.00666667	0.75	0.246667	0.08	0.0433333	0.08	3.74907	0.000105038	-1.21169	0.759554	-0.597991	0.970121	-0.862711	0.903457	-3.95561	0.571443
100267188	14.14	14.14	12.08	15.0967	17.94	7.485	7.55	10.4733	8.74667	9.33667	0.789341	0.385662	1.32825	0.00545745	0.231654	0.770117	0.882371	0.00133193	0.873179	0.00995688
100267223	2.185	2.04333	1.26333	2.66333	5.13667	2.26	4.88667	3.96667	5.08667	20.49	-0.21173	0.946345	-0.786924	0.624933	-1.64102	0.000190086	-0.8395	0.167566	-1.83771	0.177382
100267231	38.965	19.8467	22.7467	23.5467	21.07	55.6	39.0667	21.8433	13.48	10.0133	-0.596403	0.667137	-0.731926	0.589617	0.0962175	0.970121	0.893903	0.00332743	1.02901	4.18002e-05
100267240	1.08	3.40333	10.8867	14.53	22.31	13.965	13.6633	13.9633	17.57	22.15	-3.77764	2.7754e-08	-1.54862	0.0883651	-0.359907	0.816377	-0.18121	0.702452	-0.168688	0.904476
100267287	2.295	3.58	7.87333	0.81	0.53	0.805	0.793333	1.17667	5.56667	1.58	1.38503	0.595698	2.57451	0.000967781	2.76563	0.0028644	-2.67128	0.000605781	-1.69189	0.106564
100267301	1.87	1.59	3.21	0.963333	0.716667	1.4	1.16333	0.75	0.356667	0.21	0.271017	0.946345	0.701207	0.780382	2.11794	0.00772566	1.52854	0.184187	1.6887	0.1956
100267378	1.07	7.44	0.0233333	0.25	0.07	14.39	7.70667	1.95333	0.546667	0.286667	-4.072	0.146522	0.692043	0.896572	-6.35289	0.0014919	-1.0602	0.792625	-2.41012	0.452448
100267393	8.515	2.06333	0.453333	0.23	0.296667	0.885	4.57	1.62333	2.32667	1.98	3.00087	0.230993	-0.816934	0.704933	-1.84011	0.0928117	-3.2277	0.000765125	-2.83	0.0326539
100267418	0.835	1.59333	0.386667	3.52667	8.32	5.345	4.45667	1.72	2.51	8.07	-2.83616	0.0404956	-0.822482	0.837993	-2.13565	0.00322397	0.590649	0.251051	-0.282718	0.906048
100267442	3.91	0.716667	0.923333	1.13333	2.43	2.33	1.76333	1.01333	3.34667	1.36667	0.634965	0.778708	-0.978323	0.574025	-0.106987	0.973368	-1.46326	0.00267911	0.826743	0.323384
100267469	23.175	4.73	2.91333	0.846667	0.566667	3.515	2.87	2.04	0.986667	1.27	2.55222	3.1097e-06	1.25554	0.30576	0.530081	0.73813	-0.130394	0.940001	-1.46578	0.352559
100267499	5.83	1.97667	3.01667	14.8867	12.19	5.845	5.7	8.33333	3.79667	2.75667	-0.194643	0.946345	-1.15953	0.155612	-1.41995	0.0738522	2.07091	3.38971e-10	1.70406	0.286598
100267501	24.015	24.3167	29.7133	15.8233	13.8067	15.655	22.21	27.4067	34.6733	18.6433	0.477939	0.483057	0.618248	0.614102	0.135061	0.845933	-1.03756	2.68696e-09	-0.52079	0.128697
100267506	390.535	553.137	402.217	236.037	185.287	330.045	366.937	202.19	377.14	285.44	0.109027	0.958526	1.01255	0.238906	1.00623	0.00128778	-0.571428	0.0296432	-0.679757	0.125554
100267536	39.14	15.4567	18.9067	22.4567	17.04	34.475	25.1	15.6467	10.6867	7.87	0.00977736	0.996584	-0.399475	0.729202	0.282764	0.768389	1.1584	0.000907379	0.806709	0.560518
100267550	51.045	11.1367	8.61	5.33333	3.4	17.205	12.64	8.63	6.08	4.07667	1.41563	0.00289393	0.188027	0.921088	0.0135403	0.999362	-0.0918919	0.917227	-0.35154	0.651358
100267554	55.265	55.6767	24.4267	10.3233	2.76333	42.525	66.17	36.7033	26.0633	15.69	0.240272	0.946345	0.0416967	0.973999	-0.57075	0.453964	-1.25839	0.337505	-2.72267	0.0018411
100267557	4.4	19.03	38.9467	48.62	40.2333	23.975	39.32	58.87	35.2467	30.6133	-2.58338	7.41275e-06	-0.669297	0.247815	-0.567894	0.0295145	0.571772	0.000119186	0.177161	0.914454
100267567	9.26	20.16	69.34	150.687	232.87	40.02	58.5867	86.2867	134.257	215.273	-2.24518	0.00678998	-1.02561	0.350678	-0.294776	0.809116	0.262721	0.404809	0.111219	0.888426
100267572	6.25	1.59	2.25333	1.05667	0.84	1.525	1.82667	1.24667	1.10667	0.723333	1.92248	0.001544	0.121899	0.966907	0.899778	0.205087	0.0213278	0.986771	-0.0408145	0.9873
100267575	57	24.1233	23.1733	30.12	29.11	15.41	28.3033	22.1067	53.28	81.4433	1.79875	0.108165	0.099176	0.973999	0.0644984	0.984255	-0.733897	0.173548	-1.45169	0.0027867
100267577	15.905	18.7067	15.44	8.03	8.34	6.59	14.1567	4.60333	17.7167	18.3433	1.22866	0.680667	0.717991	0.728998	1.75284	6.38699e-12	-1.05485	0.0277613	-1.24727	0.0363634
100267584	1.72	8.89667	7.06	1.81333	1.48	5.835	5.74	5.77	3.89	3.88667	-1.96922	0.0855859	0.903786	0.321829	0.318294	0.705572	-1.00717	0.0463406	-1.50208	0.000252045
100267585	12.32	6.18333	6.2	2.17333	3.78	6.97	7.64333	7.8	4.83667	2.64667	0.670806	0.404884	0.0751444	0.969765	-0.3226	0.684591	-1.06649	0.00762618	0.476547	0.525346
100267586	89.765	119.013	52.28	38.1867	29.2033	91.045	113.027	109.843	82.8667	23.3467	-0.244562	0.946345	0.394752	0.845382	-1.04822	0.0522903	-1.02134	3.53964e-07	0.35786	0.746821
100267588	3.585	4.37667	4.05333	1.67667	1.79	2.3	3.42333	2.14	2.22333	1.45	1.02436	0.649134	1.62623	0.227039	1.32255	3.89272e-08	-0.695806	0.0748258	0.45773	0.589942
100267612	2.39	0.103333	0.0166667	0	0	0.035	0.0233333	0.02	0.05	0.01	6.99549	0.00661971	2.68424	0.668697	0.0401541	0.999362	-2.30991	0.855077	-1.02622	0.935836
100267676	27.58	18.1267	15.2133	5.47667	3.70333	11.145	17.2	10.0367	16.7033	10.4733	1.21402	0.552342	0.445683	0.497902	0.619518	0.0953047	-1.50617	1.91651e-07	-1.59134	0.0577963
100267678	0.03	2.22667	4.02333	1.10333	1.99	0.71	0.7	1.03667	0.463333	1.36	-4.89009	0.155338	2.11246	0.0019397	2.01343	0.529689	1.34736	0.0625608	0.616862	0.748902
100267683	6.145	3.00667	4.36667	1.90667	1.53	3.51	3.07333	3.54333	4.64	2.01333	0.687922	0.568197	0.278291	0.870585	0.326128	0.664375	-1.19145	0.000546147	-0.348076	0.800657
100267695	4.44	1.30333	1.36333	7.17667	3.21	4.42	3.38667	2.60667	2.45	1.77	-0.129104	0.95	-1.09241	0.401466	-0.922592	0.36965	1.64755	7.53492e-09	0.950605	0.445637
100267700	3.85	7.60333	11.24	13.6233	7.96667	9.18	9.49667	10.59	9.51	8.76333	-1.40288	0.00652677	0.156769	0.960578	0.10486	0.967639	0.611057	0.00339094	-0.198407	0.78459
100267702	15.15	117.857	78.44	59.2167	76.3567	40.345	107.763	135.897	128.85	104.66	-1.60739	0.122427	0.485828	0.808515	-0.766909	0.765067	-1.01802	0.00401894	-0.392836	0.70481
100267760	64.435	1.79667	0.336667	0.0533333	0.0566667	6.67	0.91	0.116667	0.0266667	0.983333	3.15419	0.00539752	1.34165	0.69066	1.57387	0.752996	1.1481	0.888848	-4.80651	0.133282
100267769	3.7	10.4167	17.5967	15.8133	13.9767	11.68	15.44	14.5633	21.7	24.54	-1.81716	0.00112535	-0.150762	0.960578	0.291083	0.610284	-0.367682	0.184931	-1.0366	0.170357
100267772	6.435	16.4433	26.8567	83.85	90.96	18.405	31.6367	39.83	78.96	53.4067	-1.66563	0.00166872	-0.635766	0.61291	-0.543445	0.0738668	0.184179	0.351024	0.8245	0.212302
100267784	24.585	15.2633	16.6367	3.66	2.22	15.38	13.16	11.45	7.97333	3.92333	0.519101	0.768107	0.589096	0.328302	0.562743	0.0915124	-1.02304	0.0052326	-1.05355	0.334388
100267788	9.375	0.236667	0.35	0.0433333	0.0866667	0.455	0.253333	0.143333	0.09	0.03	4.16012	0.000695756	0.245185	0.973999	1.44632	0.757132	-0.461617	0.966511	1.40449	0.893168
100267793	5.9	9.31	12.0233	11.5533	12.12	22.755	14.4533	13.31	5.22	5.79667	-2.14164	0.00882328	-0.324762	0.78683	-0.114222	0.970121	1.24748	0.0106785	0.863851	0.282894
100267804	201.77	2.66	0.263333	0.09	0.21	1.575	3.71	0.346667	0.0866667	1.18333	6.84231	6.86906e-08	0.0505001	0.984637	-0.392639	0.970121	0.127726	0.986771	-3.16926	0.469506
100267810	23.605	65.0367	66.27	171.253	31.01	33.96	25.9967	42.24	27.22	28.9133	-0.507839	0.933275	1.64485	0.427301	0.672466	0.964317	2.7409	9.94885e-05	-0.243034	0.924646
100267811	63.05	16.8933	14.8933	6.62	3.20333	19.885	13.0767	13.0467	9.91667	4.47	1.50472	0.00183046	0.894096	0.51245	0.201092	0.89175	-0.487253	0.202489	-0.80667	0.588921
100267818	0.085	0.17	0.08	0.496667	0.396667	0.245	0.44	0.12	0.183333	0.536667	-1.64616	0.554293	-1.05163	0.485767	-0.614503	0.900931	1.53878	0.00870604	-0.431055	0.745203
100267819	17.64	50.5767	124.957	408.413	394.99	106.455	152.29	183.137	280.653	334.18	-2.68659	0.126913	-1.18567	0.00845009	-0.534353	0.56418	0.640323	0.0032714	0.144189	0.927656
100267825	148.195	61.1633	43.8067	33.34	37.1467	30.36	38.69	27.42	41.9967	41.72	2.12154	0.00103289	1.11326	0.0848107	0.756527	0.00437311	-0.354645	0.127045	-0.317319	0.628124
100267841	2.14	0.863333	3.39667	0.66	0.04	7.765	7.4	3.84667	1.60667	0.393333	-2.06462	0.183499	-2.79063	1.07762e-06	-0.165746	0.970121	-1.21339	0.510177	-3.78521	0.152543
100267847	11.59	20.13	11.78	40.2533	49.7033	41.285	27.44	24.1933	24.4767	33.83	-1.92952	0.00702459	-0.0897918	0.960578	-1.02152	1.07249e-06	0.81646	0.00176348	0.539016	0.149444
100267888	183.585	9.74333	16.3633	34.13	29.6833	19.625	20.8967	24.84	27.1667	30.65	3.04773	0.00227965	-0.572737	0.810833	-0.591183	0.477709	0.432062	0.121917	-0.00120717	0.998684
100267897	3.24	0.676667	0.603333	0.206667	0.293333	1.87	1.27333	0.953333	0.99	0.626667	0.557603	0.916145	-0.391023	0.960354	-0.658784	0.714249	-2.173	0.00385688	-1.00783	0.658405
100267902	61.415	724.823	495.697	232.577	94.2133	544.64	493.71	260.517	144.117	131.633	-3.25946	2.94391e-07	0.954491	0.0332426	0.940953	0.039163	0.790224	0.0574643	-0.828492	0.597309
100268011	0.455	4.58	2.02667	3.1	3.17333	2.225	2.96333	3.13667	1.58667	1.71	-2.49164	0.00885433	0.9021	0.380254	-0.634047	0.696924	1.06546	0.0031751	0.96317	0.343105
100268021	1.105	0.6	3.16333	3.98	4.23	0.585	0.946667	1.48667	2.42333	1.51	0.722727	0.853779	-0.24612	0.960578	1.11122	0.0121408	0.813884	0.0470955	1.47029	0.00752754
100268049	1.445	1.20333	3.73667	0.36	0.266667	3.14	1.07	0.62	3.15667	1.32	-1.28549	0.621382	0.45706	0.911742	2.58967	0.0016382	-3.04135	4.17277e-06	-2.4133	0.0505329
100268054	2.17	14.3667	0.85	3.74	0.336667	47.18	16.19	13.9433	0.653333	1.54667	-4.69774	0.00238699	0.62174	0.926507	-3.99825	0.0353077	2.57311	0.578476	-2.76308	0.442273
100268056	261.345	116.003	4.58333	0.76	0.163333	23.47	8.99667	8.57667	13.3933	4.20333	3.40601	1.3433e-05	4.26327	8.01476e-05	-0.888727	0.0675784	-4.04845	1.46464e-15	-4.60707	0.00104492
100268097	39.165	4.49333	2.66667	4.40667	4.20667	5.48	10.5467	3.83333	6.68	8.51667	2.69712	0.00990425	-0.906692	0.257179	-0.518479	0.300985	-0.515898	0.288758	-0.898318	0.489176
100268106	930.135	13248.5	10071.9	7333.23	7569.74	9731.17	9166.03	8620.23	5557.02	4044.17	-3.43325	0.00726163	0.907324	0.000119345	0.23791	0.673524	0.493266	0.00541806	0.49912	0.806156
100268107	2.135	0.383333	0.786667	0.426667	0.11	0.11	0.843333	0.343333	0.276667	0.273333	3.94295	0.00019612	-0.66593	0.709462	1.32815	0.122309	1.11098	0.44426	-1.82809	0.49283
100268109	1.25	1.38667	1.51	1.58667	0.63	1.56	1.84667	1.23333	1.85667	2.46	-0.456443	0.804525	-0.0076316	0.995457	0.299195	0.95607	-0.139256	0.880413	-2.11164	1.61964e-05
100268122	35.22	7.60333	6.58	4.72333	1.68333	5.29	3.89333	5.57667	8.89	4.06333	2.57624	0.00146007	1.37252	0.0155434	0.25062	0.835647	-0.812645	0.0573745	-1.2881	0.00780052
100268124	20.145	20.2767	6.81333	28.5633	19.11	25.31	21.8867	9.78333	8.09333	19.8833	-0.497258	0.706765	0.52177	0.886402	-0.497769	0.2944	1.91656	2.04958e-14	-0.480379	0.848211
100268126	10.6	0.806667	0.593333	0.293333	0.0633333	0.675	0.453333	0.406667	0.55	0.04	3.86368	0.00108383	1.47753	0.711414	0.578994	0.915722	-0.805274	0.820202	0.106185	0.994757
100268134	100.97	148.163	285.77	52.1067	70.8133	52.65	78.2267	83.2933	154.04	144.577	0.904984	0.776784	1.3463	0.106343	1.80181	4.92409e-06	-1.46948	1.81984e-33	-1.1856	0.0153354
100268147	5.975	4.94	0.476667	0.586667	0.126667	6.26	7.07	2.01	1.84333	0.9	-0.359681	0.946345	-0.119803	0.968191	-2.07207	5.50783e-05	-1.57753	0.0977371	-2.95372	0.0256997
100268149	39.405	17.0167	55.1667	90.5767	86.1733	40.69	40.54	53.2933	45.7067	44.6433	-0.194424	0.931035	-0.915455	0.0198161	0.0596077	0.970121	1.08532	4.89927e-07	0.844135	0.0302206
100268161	32.77	61.5633	130.383	164.177	157.47	136.43	127.863	158.353	127.18	148.683	-2.17261	0.000459841	-0.615405	0.46857	-0.256463	0.65796	0.459475	0.00181575	-0.0481014	0.947944
100852434	0.17	0.863333	1.62	2.47333	2.33667	0.535	1.09667	2.23333	7.38333	7.59333	-1.73015	0.526446	-0.0903199	0.973999	-0.453014	0.856131	-1.48273	7.78163e-06	-1.60232	0.0651625
100852435	4.02	4.48667	2.35333	4.06667	3.00333	5.095	4.36	2.19	1.54	3.95333	-0.489704	0.820971	0.639138	0.810572	0.116007	0.970121	1.50018	0.00190712	-0.866895	0.690725
100852504	1.725	0.666667	1.41667	0.32	0.06	1.09	0.903333	0.266667	0.443333	0.12	0.507319	0.895967	-0.178744	0.973999	2.4443	0.00191467	-0.361283	0.890383	-1.03778	0.81389
100852555	24.085	9	13.6967	4.48333	4.09	5.465	7.82	7.85	5.93667	2.20333	1.98124	0.000521398	0.649745	0.839375	0.820886	0.324775	-0.305143	0.789483	0.942306	0.566586
100852609	12.435	19.1867	28.8933	12.7033	7.31333	29.805	29.8333	23.5633	20.1533	11.3067	-1.41132	0.00212012	-0.425162	0.880413	0.316663	0.384885	-0.567189	0.0361503	-0.632834	0.162499
100852645	39.7	1.56	0.283333	2.15667	0.0933333	0.96	1.78333	0.1	0.41	0.61	5.21844	0.000855692	0.453686	0.956419	1.52649	0.532382	2.46351	0.424605	-2.9858	0.0326244
100852659	107.365	6.71333	5.45667	0.85	0.0633333	11.135	6.05333	2.12333	0.273333	1.54	3.17796	0.53112	0.720657	0.728998	1.43195	0.643164	1.68825	0.566461	-5.14523	0.00866985
100852683	4.255	2.69667	1.92333	4.09667	2.03	5.65	5.46	2.57	2.14333	3.81333	-0.583277	0.691366	-0.646083	0.525788	-0.413377	0.531919	1.03299	0.00328612	-1.34585	0.402463
100852723	0.195	2.82667	0.506667	0.0333333	0	0.27	0.263333	0.146667	0.0966667	0.0333333	-0.550653	0.946345	3.74663	0.000328878	1.81379	0.361597	-1.45083	0.814851	-1.79452	0.904476
100852749	11.45	9.57667	5.75667	2	3.32	6.155	7.09	4.40667	6.48333	4.70667	0.680472	0.789153	0.802262	0.100103	0.404784	0.759067	-1.5991	6.53504e-05	-0.620669	0.496941
100852765	15.545	70.1167	127.333	174.017	241.723	94.1	115.117	138.49	210.453	152.87	-2.74713	1.15509e-06	-0.348384	0.687686	-0.0938234	0.970121	-0.176039	0.430136	0.624185	0.00657773
100852777	48.86	62.6167	19.6867	0.983333	0.406667	14.11	10.8733	4.98333	1.04667	0.536667	1.52409	0.504574	2.80731	1.07762e-06	2.01178	0.580967	0.019858	0.993204	-0.585983	0.904476
100852790	15.375	12.5267	13.6833	6.29333	6.58333	6.88	16.74	17.2167	21.4433	7.9	1.03395	0.2564	-0.204966	0.960578	-0.320499	0.589865	-1.6803	8.73872e-09	-0.195129	0.904476
100852802	3.66	3.80333	12.17	68.9533	71.28	23.055	17.0867	41.5467	10.1367	10.57	-2.9283	0.142674	-1.84153	2.86459e-05	-1.73537	0.0173938	2.85429	1.25579e-10	2.3846	0.018598
100852808	10.09	8.88667	21.2533	7.80667	11.31	17.915	13.61	20.7667	29.0267	9.37	-1.02563	0.743078	-0.395261	0.893513	0.0439852	0.981736	-1.80068	4.06769e-07	0.309333	0.808606
100852822	794.3	37.95	36.3633	23.1667	23.47	94.35	41.44	27.3	34.78	23.34	2.88229	0.00812979	0.136707	0.960578	0.43029	0.157172	-0.487687	0.54556	-0.237782	0.891879
100852835	15.145	4.08333	4.69	4.22667	5.79	3.495	5.5	4.41333	5.03	3.54333	2.01271	0.0047354	0.00343182	0.997799	0.106688	0.970121	-0.153144	0.828698	0.599221	0.311645
100852860	13.545	0.41	0	0	0.0966667	14.78	5.40667	1.74	0.186667	0	-0.430305	0.946345	-3.41842	0.034664	-6.02064	0.00713241	-2.72777	0.783317	1.78699	0.904476
100852885	22.79	0.106667	0.0666667	0.08	0	0.635	0.166667	0.0266667	0	0.116667	5.05416	0.000191192	-0.200168	0.973999	1.3714	0.915722	3.59025	0.453426	-4.45937	0.323177
100852886	0.105	0.13	0	1.45667	0.193333	0.43	0.0333333	0.746667	0	0.46	-2.59419	0.750649	2.91487	0.720537	-6.5155	0.000259533	7.63856	0.218634	-1.85837	0.635026
100852926	1.94	1.83	4.56	1.66333	2.85333	3.845	3.17333	4.1	6.59	2.64	-1.20254	0.758892	-0.649698	0.84588	0.17257	0.970121	-1.92489	2.69897e-06	0.100788	0.935836
100852930	1925.52	0.13	0.0333333	0.0333333	0	0.045	0.32	0	0	0	14.9905	0.00539752	-1.03611	0.926507	1.00193	0.970121	1.10906	0.940001
100852953	472.905	961.707	389.143	125.623	154.607	221.9	238.363	324.84	294.807	244.813	0.950634	0.0802949	2.69087	0.0334946	0.289065	0.535502	-1.13271	3.94148e-29	-1.13733	0.541624
100852957	28.175	7.03333	5.37	1.42667	1.28667	5.855	5.34	2.02667	2.67	2.33667	2.19915	0.320175	0.877666	0.623592	1.43115	0.00537747	-0.812716	0.443043	-1.08801	0.398144
100852969	60.455	1.96667	1.94667	1.55333	0.933333	3.13	1.75333	1.53333	2.86	2.2	4.07389	0.000288539	0.425574	0.892108	0.363252	0.852914	-0.785102	0.190072	-1.12137	0.462953
100853075	7.27	2.76333	1.67333	1.29333	0.536667	2.68	2.36	0.96	1.58	1.76333	1.33467	0.389778	0.639346	0.443337	0.806028	0.178432	-0.207492	0.92593	-1.90521	0.00326646
100853096	5.815	3.92	3.88	3.33	1.87	3.385	3.83333	2.04333	7.46	4.08667	0.669105	0.693789	0.264056	0.957099	0.93837	0.183504	-1.06257	0.0064881	-0.988955	0.564129
100853105	0.39	3.44333	0.54	2.53667	2.42667	0.29	0.606667	0.766667	1.08333	3.37	0.335346	0.946345	3.3975	0.0533898	-0.628149	0.7529	1.417	0.00018183	-0.856238	0.596412
100853107	3.185	2.70333	0.506667	0.23	0.2	0.81	0.406667	0.46	0.24	0.36	1.86778	0.041034	3.44954	0.00663216	0.165528	0.970121	0.0775129	0.980098	-1.45912	0.688529
100853145	4.97	2.64333	3.84333	0.996667	0.45	3.545	2.19333	1.13667	1.12333	0.846667	0.416453	0.898281	0.545887	0.800012	1.76326	0.000605525	-0.067941	0.958019	-0.962221	0.267906
100853165	783.145	42.0867	44.7767	50.0633	31.87	80.09	45.2167	36.53	21.29	31.9167	3.09544	0.0782846	0.327509	0.850758	0.302572	0.761125	1.32994	5.76028e-07	-0.292798	0.877319
100853219	11.5	16.0867	28.8167	62.56	69.2533	41.615	44.17	49.83	48.9133	49.0733	-2.00859	2.09866e-05	-1.11604	0.000359075	-0.772751	6.11532e-06	0.454672	0.0847522	0.458485	0.344131
100853296	15.83	18.2133	28.15	30.4267	15.2433	7.1	6.88333	14.8967	11.7633	11.1967	1.0208	0.800238	2.0623	0.11923	0.937956	0.778269	1.46711	0.00186654	0.165494	0.935836
100853380	25.87	3.91	6.97333	8.96333	7.04667	5	5.29333	5.27	3.92	3.22667	2.2426	0.0783606	-0.142595	0.960578	0.413927	0.759601	1.29014	0.000265285	1.04082	0.0108798
100853400	29.745	164.033	127.587	113.09	45.22	73.16	107.543	123.663	105.137	157.637	-1.39775	0.0392	1.102	0.195914	0.0581382	0.970121	0.200586	0.43968	-2.07582	0.00433943
100853406	0.835	0.136667	0.12	3.04667	0.0366667	0.455	0.176667	1.81	0.09	0.56	0.733783	0.888549	0.223626	0.973999	-4.0399	8.13054e-05	5.58299	0.215097	-4.80529	0.0804116
100853422	4.77	2.07333	5.14667	11.09	11.92	6.265	7.71667	6.89333	6.52667	5.99	-0.515752	0.740187	-1.55826	0.00691987	-0.418499	0.788339	0.841177	0.0322686	1.06759	0.116859
100853452	0.06	0.273333	0.86	0.126667	0.376667	0	0.0533333	0.12	0.226667	0.233333	2.76148	0.912007	3.0775	0.269687	3.14701	0.00697934	-0.863445	0.83148	0.638402	0.769335
100853501	0.02	0.253333	2.18333	0.72	0.596667	0.15	0.146667	0.213333	0.41	0.456667	-3.14716	0.836809	1.02727	0.854981	3.47835	9.39481e-09	0.974621	0.356726	0.53118	0.881436
100853522	0.8	1.11667	0.17	0.523333	0.56	0.655	1.91667	1.36	1.67667	0.766667	0.0402274	0.993854	-0.336149	0.949357	-2.99065	0.00546012	-1.60815	0.00144431	-0.333646	0.895121
100853526	1.31	0.626667	0.373333	14.7833	0.443333	2.975	0.466667	3.41	0.0866667	2.46333	-1.34634	0.765407	1.16583	0.823115	-3.16131	0.000209451	7.77762	0.0149542	-3.03396	0.167113
100853590	0.37	0.39	0.14	8.79	0.343333	1.04	0.163333	1.98333	0.0466667	1.51	-1.70077	0.684292	1.91076	0.684816	-3.92587	0.000686558	8.371	0.033767	-2.74922	0.329926
100853635	2.345	1.31333	1.31333	0.443333	0.333333	0.99	1.11667	0.763333	1.04333	0.513333	1.09454	0.413175	0.657892	0.610761	0.811505	0.297263	-1.11744	0.00697109	-0.699025	0.462423
100853647	20.18	0.47	0.16	0.903333	0.36	1.61	0.423333	0.02	0.273333	0.58	3.53298	0.000233031	0.304533	0.973999	2.94145	0.401552	1.8184	0.301375	-0.613807	0.799135
100853652	0	0.06	0.806667	5.38667	1.28667	0.295	1.39333	4.49333	2.54333	4.92333	-5.12655	0.728071	-4.07032	0.0501809	-2.48442	0.00501304	1.16408	0.44076	-2.0214	1.99738e-06
100853656	21.785	0	0	0	0	0	0	0	0.0133333	0	23.007	0.000146355					-0.814489	0.940001
100853675	2.085	0.806667	0.433333	22.7967	0.926667	5.42	0.916667	5.26667	0.07	4.60333	-1.52495	0.628516	0.166966	0.972574	-3.62941	1.51319e-09	8.38099	0.0103615	-2.79939	0.194034
100853680	0.895	0.753333	0.993333	3.17333	1.13667	1.06	1.17333	1.12	0.906667	0.9	-0.368763	0.946345	-0.388402	0.889665	-0.164761	0.970121	1.91771	0.000697556	0.134247	0.936625
100853745	0.065	0.16	0.0666667	4.27333	0.126667	0.21	0.103333	1.07667	0.0266667	1.23	-2.54106	0.808996	1.52437	0.851669	-4.22248	0.0027895	8.24123	0.0977371	-3.97419	0.0908863
100853747	13.295	1.20667	1.18333	6.55667	25.5933	1.855	5.93667	4.31	1.30333	0.753333	2.7208	0.338716	-1.84387	0.547631	-1.8555	0.0958556	2.41693	0.027659	4.97819	3.751e-21
100853750	8.16	4.00667	5.05333	18.0433	23.5633	6.57	5.34333	11.0733	14.0533	6.33667	0.203013	0.946345	-0.0924047	0.973999	-1.1219	0.00907261	0.463898	0.131373	1.96403	0.000867761
100853785	17.955	261.937	212.993	121.413	44.76	239.915	176.947	156.223	55.3633	30.22	-3.78303	0.00475307	0.855096	0.22407	0.471884	0.544529	1.22584	0.256445	0.245323	0.912364
100853820	0.3	0.32	0.09	5.41333	0.283333	0.535	0.153333	1.15333	0	1.02333	-0.971734	0.901418	1.87538	0.766322	-3.97706	0.0022624	9.5246	0.0958054	-2.45426	0.461664
100853861	92.885	41.03	25.0233	13.33	11.3567	25.08	31.0233	21.7167	23.6233	28.6567	1.72207	0.000517023	0.885691	0.387156	0.217105	0.877806	-0.728621	0.00193499	-1.57238	0.0225088
100853897	25.73	1.25	0.74	1.03	0.803333	1	1.12667	1.95	2.65	2.12	4.45115	0.00894611	0.691504	0.805626	-1.40039	0.236249	-1.29764	0.0309993	-1.69625	0.12428
100853941	425.295	30.5133	27.9467	10.5933	3.75	17.92	34.04	13.58	8.45	34.12	4.48419	0.0185954	0.363252	0.943173	1.08255	0.213264	0.397348	0.940001	-3.69733	0.00795293
100854009	31.575	63.2267	61.25	110.497	136.36	62.06	71.87	81.7567	98.6267	156.357	-1.11438	0.00652571	0.341952	0.902257	-0.393047	0.058115	0.260665	0.109707	-0.499896	0.746553
100854014	5.225	9.94667	9.19333	6.73667	5.73	3.685	5.21667	7.33667	16.8933	13.19	0.359094	0.815712	1.59004	0.344625	0.340576	0.573238	-1.22446	0.00177836	-1.33448	0.00657987
100854029	3.68	13.2733	11.4133	6.02667	4.14667	20.05	14.01	9.07	7.35667	3.97667	-2.61601	1.09082e-06	0.20936	0.925854	0.353855	0.739032	-0.185125	0.781897	-0.0759	0.954762
100854033	2.95	7.69667	3.94333	2.23	0.186667	22.86	14.7	2.39667	0.593333	0.303333	-3.13956	1.99316e-06	-0.722512	0.74742	0.714879	0.814124	2.01316	0.163522	-0.799529	0.871256
100854039	100.47	64.5867	59.37	30.3767	24.2133	37.32	34.0367	33.6867	58.9333	53.7033	1.29928	0.0048246	1.38457	0.0165707	0.818558	0.0026598	-0.844414	1.84544e-07	-1.17701	0.0256997
100854071	73.34	24.4467	43.56	11.07	8.66667	15.93	40.3	15.93	27.07	14.0533	2.14381	0.259107	-0.375511	0.763777	1.45745	0.000188878	-1.20999	0.336714	-0.831596	0.450694
100854096	4.29	2.17333	3.55333	2.63	5.03	2.83	2.51667	1.58	0.986667	1.08	0.431842	0.906143	0.0958063	0.973999	1.17184	0.165339	1.50484	0.00477176	2.22885	0.00339809
100854106	0.51	1.07667	1.78333	1.47333	0.36	0.095	0.78	0.276667	0.04	0.71	2.21164	0.691973	0.701382	0.951823	2.70195	0.13122	5.18605	0.00194452	-1.64022	0.783897
100854120	1.125	5.14	0.136667	0.0733333	0	0.975	0.446667	0.92	0.75	0.246667	0.137595	0.984798	4.07265	0.00247042	-2.75313	0.239869	-3.31419	0.123844	-3.49211	0.650423
100854121	106.015	15.7533	40.1733	3.6	0.616667	13.235	18.87	37.8933	66.8367	19.9033	2.84106	0.322396	0.0800982	0.973999	0.0709158	0.997712	-4.11078	9.89853e-26	-4.87952	3.50886e-07
100854247	33.245	16.9267	8.94667	4.25667	1.03667	11.92	8.57333	5.69667	2.47333	1.29	1.28793	0.436166	1.35328	0.00115686	0.663429	0.477501	0.877239	0.596247	-0.269734	0.909307
100854348	4.71	0	0.12	0	0	0.12	0.02	0	0	0	5.10072	0.00245107	-0.442872	0.973999	3.47349	0.608357
100854361	81.865	66.8867	91.38	158.247	213.697	94.645	101.443	115.557	118.793	103.927	-0.328998	0.754324	-0.264551	0.698853	-0.320068	0.0451597	0.509367	0.000102232	1.05781	0.00768453
100854480	5.875	4.02333	2.17	0.37	0.106667	2.525	1.92	0.84	1.26333	0.37	1.12272	0.217225	1.42435	0.0198161	1.37355	0.0317364	-1.66891	0.00280142	-2.08321	0.144896
100854520	31.945	22.9733	81.2533	12.77	20.4333	21.505	25.03	33.3733	32.8133	10.63	0.497627	0.88555	0.14115	0.960578	1.32115	0.00307804	-1.2711	2.3398e-05	0.95317	0.014669
100854522	29.605	35.12	8.46	12.4933	11.1967	25.61	46.28	36.9433	23.1867	15.2733	-0.101914	0.991202	0.136752	0.973999	-2.11349	0.00114988	-0.795853	0.161086	-0.642155	0.670928
100854531	29.79	8.64333	7.18333	8.95667	1.87667	12.435	6.1	1.49333	2.09667	3.73333	1.10204	0.559711	0.892309	0.376578	2.29694	1.52613e-08	2.19262	0.00782238	-1.55853	0.479671
100854586	0.71	2.65333	3.89333	6.81333	9.74	4.96	10.67	9.66667	4.27333	4.81	-2.83182	0.417269	-1.77173	0.100954	-1.291	4.98329e-06	0.768081	0.0827338	1.10698	0.302489
100854597	5.35	18.65	18.3833	68.15	110.7	33.045	43.65	55.74	66.87	59.6967	-2.55204	0.0105384	-0.991071	0.360637	-1.58845	2.99012e-05	0.172166	0.770983	1.09974	0.320812
100854621	0.695	2.51333	9.31	4.59	3.43667	0.52	1.41333	1.54	8.36333	7.97	0.246727	0.95918	1.10629	0.45697	2.6215	7.26558e-05	-0.765172	0.0410898	-1.06162	0.598641
100854643	0	0.726667	0.386667	0.506667	0.7	0.545	1.18667	1.75667	1.89	1.51333	-5.96048	0.233864	-0.463185	0.910526	-2.16844	0.00469295	-1.79895	0.00475276	-1.11217	0.384764
100854646	36.645	3.88333	1.76667	1.05	0.793333	6.42	2.93	1.23	0.813333	0.716667	2.43797	0.00724155	0.841222	0.613806	0.532393	0.895616	0.476806	0.85746	-0.362563	0.935836
100854693	5.655	2.54333	3.53333	1.87667	2.14	2.215	2.41667	2.71	4.1	2.19333	1.22126	0.0923281	0.390504	0.742778	0.391824	0.661927	-1.03081	0.00105868	0.0427488	0.981921
100854716	30.28	11.94	10.45	24.4633	27.3933	47.24	24.2	18.3933	11.8933	15.38	-0.740446	0.499314	-0.753508	0.485368	-0.79478	0.00501425	1.13811	1.32889e-12	0.848913	0.069862
100854719	16.085	15.0833	11.9967	9.49667	7.27333	10.875	11.0433	11.1633	14.4067	13.8433	0.449147	0.706864	1.00671	0.460056	0.118736	0.944961	-0.504312	0.0687248	-1.01418	0.000761542
100854725	20.435	17.3167	8.15	3.62333	1.38333	14.315	6.45667	5.97	3.01333	2.25667	0.395218	0.844081	1.82759	2.55261e-06	0.465374	0.429778	0.353763	0.577791	-1.02438	0.491684
100854828	25.745	7.46667	2.47667	1.38	0.466667	3.685	5.69667	2.50667	1.86667	1.52333	2.6035	0.00567482	1.01307	0.628719	-0.0211396	0.999362	-0.333335	0.817181	-1.94009	0.0802549
100854874	16.37	12.8267	27.5333	49.1367	55.2633	27.32	34.7033	27.46	37.4333	75.6433	-0.844209	0.464883	-1.12131	0.00247532	0.0117027	0.999362	0.489539	0.043692	-0.347179	0.839834
100854884	20.795	3.93	16.2233	136.813	98.3333	14.835	25.23	45.82	28.7733	52.9167	0.355192	0.898281	-2.05039	0.110256	-1.46509	0.000209162	2.34635	5.71809e-55	0.466651	0.861667
100854924	55.45	100.88	111.923	48.7967	36.6633	98.295	77.84	53.0767	61.1467	66.6833	-0.889981	0.643689	0.79565	0.25182	1.10248	0.000572288	-0.226023	0.743559	-1.32975	0.44764
100854976	0.125	0.196667	0.54	5.09667	7.03333	0.86	1.25	3.72667	4.04333	2.53	-2.95126	0.211449	-2.23086	0.191975	-2.74564	7.7371e-06	0.42072	0.777424	1.10433	0.482487
100854994	4.965	1.62333	2.62	1.83	2.55667	5.365	7.15667	8.3	6.31333	1.96	-0.277968	0.946345	-1.73397	0.00545745	-1.65585	0.00282585	-1.69051	6.42375e-06	0.410395	0.790772
100855044	6.17	7.96667	7.26333	10.2533	9.28333	12.195	18.4733	15.9133	10.4667	6.9	-1.23586	0.549177	-0.923429	0.0219894	-1.1742	2.12025e-05	0.0546715	0.940001	0.523442	0.672533
100855046	0.14	0.18	0.893333	0.746667	0.466667	0.295	0.583333	0.823333	1.38333	1.44667	-1.27097	0.793124	-1.3962	0.582149	0.132217	0.970121	-0.799199	0.232602	-1.82844	0.00855594
100855091	10.53	14.59	16.1467	48.4333	37.0333	21.185	25.68	17.9833	22.8167	38.89	-1.13123	0.143835	-0.408826	0.698203	-0.136375	0.90434	1.18011	9.28834e-09	-0.203339	0.830909
100855128	37.415	7.53	5.9	4.37667	2.04667	12.195	10.75	6.78333	5.75	3.01333	1.46325	0.00652571	-0.277432	0.918304	-0.199549	0.954001	-0.289842	0.535202	-0.597526	0.371584
100855129	67.01	21.6767	22.0933	1.3	0.13	73.955	12.3633	1.51667	0.02	0.363333	-0.236942	0.946345	1.07628	0.421997	3.87486	5.32668e-12	6.12335	0.000183795	-2.22867	0.642264
100855202	4.465	1.92333	2.54333	1.09333	1.21667	2.62	2.18333	2.01	2.68333	1.29333	0.704165	0.505834	0.0997983	0.972574	0.397005	0.658821	-1.11511	0.00062544	0.0739461	0.961555
100855206	11.21	22.42	41	35.8633	37.1467	38.62	26.2033	39.9167	36.3233	38.96	-1.88482	0.00787585	0.186493	0.910596	0.0634703	0.970121	0.0791627	0.875857	-0.266655	0.846943
100855221	0.185	8.58667	4.85333	0.18	0.413333	0.37	0.163333	0.0233333	0.32	2.33	-1.08937	0.931035	5.84404	0.0410863	7.66197	9.39481e-09	-0.740784	0.786931	-2.53766	0.101802
100855224	26.015	26.3067	25.22	17.4667	32.13	28.52	23.5433	9.61333	13.0433	9.24	-0.284894	0.931035	0.69332	0.765024	1.40379	0.00381472	0.514899	0.266972	1.51464	0.181203
100855230	50.335	13.5467	10.81	8.92	9.56333	8.815	5.19333	3.17	8.07333	4.21667	2.38462	0.00208806	1.83392	0.111507	1.78205	0.0189235	0.244995	0.787095	1.17044	0.0482929
100855232	14.43	11.4033	48.1067	41.0833	39.5067	19.97	16.4233	17.2933	34.05	43.09	-0.484583	0.831334	-0.137364	0.960578	1.47581	2.76562e-06	0.384066	0.379938	-0.124855	0.904476
100855250	21.37	23.92	20.8033	8	7.05333	11.265	13.93	5.96667	19.7233	17.4133	0.81907	0.776034	1.16387	0.347342	1.80887	7.25542e-08	-1.20994	0.000287509	-1.44228	0.0142678
100855257	4.02	2.87667	9.46	1.51333	2.20333	2.975	2.60667	4.21	4.21667	1.26	0.370589	0.935455	0.406235	0.852658	1.20702	0.0366442	-1.39505	0.00732665	0.765792	0.247747
100855260	1038.58	5192.44	2025.42	763.537	152.563	2919.32	1807.3	955.817	249.557	736.697	-1.56428	0.136345	2.1558	0.0561869	1.10767	0.000259533	1.71278	0.221543	-2.91926	0.395854
100855299	2.125	0.566667	0.6	14.2533	0.606667	2.25	0.886667	5.41333	0.213333	3.43	-0.243237	0.954215	-0.083088	0.977027	-3.17419	0.000599541	6.22604	0.0495995	-3.06025	0.147765
100855331	0.21	2.31667	4.16667	10.7767	14.6033	4.46	6.05	7.55667	5.83333	5.71333	-4.57846	0.000233031	-1.01397	0.191737	-0.856092	0.32793	0.984663	5.62854e-05	1.4376	0.0477398
100855361	1.67	0.826667	0.866667	2.24667	0.58	1.055	0.686667	0.383333	0.426667	0.53	0.76812	0.946345	0.67624	0.920227	1.28793	0.687743	2.60275	0.00516942	-0.138215	0.957979
100855367	15.76	22.6733	24.7767	12.9833	17.8	12.785	10.6733	5.94667	7.88333	5.89333	0.133338	0.96105	1.37004	0.128718	2.07867	3.51448e-07	0.823096	0.0585617	1.294	0.307619
100855376	0.52	41.8733	47.9433	28.2767	18.6633	22.285	33.5567	32.0967	18.29	25.6133	-5.63276	1.51979e-07	0.727584	0.510371	0.602431	0.000197576	0.727169	0.019186	-0.827135	0.605251
100855393	18.065	114.167	29.3333	27.14	16.0467	40.48	42.1133	33.6767	25.9533	59.3	-1.31433	0.00614408	2.172	0.192193	-0.178511	0.901446	0.161652	0.812521	-2.45697	0.17089
100855401	0.42	2.87333	1.87333	1.91667	0.936667	11.37	10.6067	6.46333	0.67	0.6	-4.92238	2.57471e-05	-1.61356	0.0819475	-1.75739	0.0676158	1.62091	0.176488	0.390842	0.910208
104877289	182.39	5.70333	16.0667	93.2867	88.61	7.42	8.29	5.32	13.5333	48.7967	4.58708	0.000914763	-0.0728952	0.973999	1.60724	0.000599541	2.88936	9.41792e-20	0.791743	0.119362
104877300	2.175	0.0233333	0.00666667	0	0	0.01	0.0333333	0	0	0.00666667	7.6281	0.000150448	0.0273052	0.995974	1.00193	0.970121			-1.02622	0.935836
104877442	4.145	1.53667	0.763333	0.17	0.0666667	1.505	0.683333	0.713333	0.54	0.793333	1.10587	0.64704	1.34901	0.141139	0.0641798	0.989027	-1.05072	0.515651	-4.73709	0.000288557
104877499	0	0.28	0.68	0.843333	0.38	1.055	1.21333	0.84	0.806667	1.02333	-8.13256	0.000949965	-1.80255	0.0600298	-0.297903	0.925525	0.161071	0.904102	-1.43323	0.0533293
104877551	2.72	0.933333	0.943333	3.36333	2.29667	5.21	4.38667	1.88333	1.14667	1.83	-1.07294	0.0673586	-1.9534	0.000119345	-0.988361	0.0225939	1.64743	1.34773e-11	0.390293	0.782579
104877588	2.74	8.65333	9	24.8767	22.1733	13.38	13.7933	14.01	21.8667	19.8567	-2.3865	0.000459841	-0.25933	0.849688	-0.618136	0.0166045	0.280426	0.177852	0.0711096	0.935836
104877592	0.995	3.98667	5.46667	1.55667	0.186667	9.505	6.35	2.89667	0.7	0.256667	-3.49608	0.00850324	-0.453837	0.870575	0.937163	0.0116889	1.24663	0.331223	-0.671374	0.873799
104877642	0.335	0.116667	0.153333	0.246667	0.173333	0.22	0.293333	0.333333	0.623333	2.39667	0.451558	0.946345	-0.95913	0.722296	-1.09225	0.728474	-1.23446	0.358383	-3.66161	0.00657773
104877812	4.565	4.57333	5.23333	5.81	5.42667	10.585	11.3567	7.08	6.46	1.20333	-1.37561	0.083535	-1.1075	0.464918	-0.418397	0.657319	-0.05176	0.954972	2.14756	0.000414631
104877958	1.05	0.516667	1.38333	0.77	0.396667	0.975	1.02	0.596667	0.59	0.41	0.0586639	0.991202	-0.765823	0.81634	1.22146	0.00688681	0.482213	0.612115	0.0175813	0.994757
104877973	2.9	0.506667	0.63	0.553333	0.306667	0.545	0.816667	0.386667	0.61	0.65	2.26257	0.00802877	-0.441312	0.876741	0.706844	0.430175	-0.0647945	0.956997	-1.06403	0.233822
104878237	3.72	1.71333	5.39667	14.2567	8.94	6.505	7.47	7.73333	10.41	6.58333	-0.950299	0.143872	-1.69158	0.00298828	-0.499301	0.256123	0.547553	0.0481895	0.350613	0.497144
104878429	2.91	3.74667	8.85333	41.9367	26.6733	16.42	17.4067	17.6767	25.8567	28.6133	-2.63298	2.36703e-06	-1.84579	2.03304e-08	-0.975285	8.42767e-06	0.793601	0.000558332	-0.167581	0.766507
104878671	0.995	0.353333	0.316667	0.923333	0.13	1.555	0.893333	0.876667	0.1	0.216667	-0.798019	0.885301	-1.10434	0.607638	-1.50821	0.529187	3.65155	0.00461693	-1.40714	0.722071
104878687	2.525	4.67667	3.89	0.766667	0.52	2.005	2.88333	0.76	2.08	1.47333	0.203007	0.951607	1.11365	0.266637	2.37	0.000187989	-1.345	0.226849	-1.85773	0.299046
104878918	0.975	0.23	0.5	0.566667	0.416667	1.225	1.80667	1.28667	0.713333	0.306667	-0.418093	0.921117	-2.59188	0.0045998	-1.38138	0.162509	-0.261225	0.893985	0.451196	0.804303
104878923	7.945	1.13333	0.45	0.09	0.03	0.135	0.18	0.03	0.03	0	5.79495	0.000330333	3.04108	0.0440592	3.85463	0.246199	1.63164	0.865359	0.897332	0.935836
104878975	10.91	3.12667	2.45333	0.343333	0.0866667	2.44	2.28333	1.24667	0.17	0.763333	2.04274	0.000154406	0.989779	0.577902	0.993727	0.434532	1.07869	0.591175	-3.74121	0.086171
104879013	0.595	18.6367	17.3967	25.13	20.06	15.14	23.96	23.3867	11.4067	6.94	-4.74952	0.0231862	0.0347347	0.978318	-0.40285	0.475435	1.24583	0.000551687	1.62684	0.0372458
104879229	2.645	4.28	5.78667	40.97	79.36	6.865	12.88	9.36333	14.2367	22.3967	-1.48916	0.00738595	-1.29636	0.0320432	-0.669921	0.203759	1.62381	6.25137e-21	1.67959	0.0018411
104879489	0.265	0.223333	0.223333	0.296667	0.163333	0.49	0.303333	0.326667	0.64	0.94	-1.03677	0.655195	-0.190136	0.971076	-0.630281	0.755607	-1.04529	0.122671	-2.53147	0.00118821
104879540	0.295	3.06667	0.933333	2.15333	1.42333	5.335	6.04333	1.04667	0.636667	0.69	-4.32319	1.46202e-11	-0.795309	0.823967	-0.135822	0.979769	1.85905	0.00596062	0.718528	0.702941
104879547	0	0	0.2	6.29333	6.4	0	0.326667	3.99	10.67	17.59			-4.02677	0.408767	-4.29122	3.47649e-07	-0.674061	0.453445	-1.30816	0.367021
104879582	0	0	0	7.02333	1.31333	0	0	0.58	0	0.426667					-5.61226	0.0514194	22.5857	6.80673e-07	1.67109	0.744693
104879662	0.93	1.31667	4.45667	13.52	12.4533	1.585	3.18333	3.81667	6.85	7.20667	-0.93511	0.749639	-0.910172	0.367796	0.166629	0.970121	1.0172	0.00177836	0.85546	0.402463
104879728	6.55	18.0033	10.3933	21.5567	8.62	32.935	23.02	9.44667	6.06333	9.41667	-2.48692	7.60956e-07	-0.00792262	0.995625	0.163131	0.970121	1.93006	0.00689937	-0.617282	0.848211
104879730	35.265	4.45667	7.55	6.00667	16.36	20.455	8.50333	5.18	6.77667	4.41	0.736733	0.857622	-0.576053	0.850542	0.571175	0.643875	-0.075033	0.940001	1.90541	0.000208217
104879776	0.905	0.83	5.99667	0.59	4.13667	1.17	4.15667	6.53667	2.83333	0.436667	-0.35038	0.966113	-1.85151	0.191975	-0.11077	0.970121	-2.18235	0.0149953	2.9711	0.00403398
104879792	2.47	0.74	1.31	1.94667	0.14	1.405	1.33	1.04667	0.116667	0.58	0.597391	0.901871	-0.625519	0.909319	0.315183	0.970121	4.16527	0.00389984	-1.92276	0.638026
104879994	50.42	120.723	49.42	18.3833	9.19333	172.61	77.5667	47.02	24.5667	16.31	-1.87959	0.0040005	0.988833	0.171981	0.0969644	0.970121	-0.311573	0.77651	-1.14795	0.410381
104880107	171.36	85.6967	190.663	150.033	196.74	142.56	94.8233	96.6533	246.407	166.073	0.234457	0.946345	0.111402	0.973533	1.00508	0.000549587	-0.617341	0.00593495	0.246217	0.684476
104880123	1.095	2.93	6.92	31.2767	34.1433	4.325	13.1533	24.3167	21.8567	22.5967	-2.19784	0.332122	-1.84517	0.00391475	-1.79221	0.00420552	0.618159	0.0172617	0.684116	0.51446
104880149	0.32	0.876667	3.84333	7.24667	9.69	0.715	0.816667	2.42	2.62667	1.77	-1.32262	0.938278	0.59258	0.909699	0.693753	0.815187	1.56567	0.0926576	2.47789	0.00207608
104880167	1.99	18.2467	5.54333	13.04	9.37333	15.545	11.8	9.04	9.52667	18.2333	-3.04941	0.000231383	1.23148	0.45209	-0.676022	0.365264	0.546895	0.227312	-1.49027	0.446403
104880253	2.795	1.90667	1.56667	1.19667	0.29	1.835	1.73	1.56333	1.33667	0.956667	0.473193	0.812119	0.4589	0.653602	0.0121997	0.999362	-0.0589687	0.967804	-1.80226	0.00354434
104880304	1.33	26.0067	3.94333	0.343333	0.736667	0.975	2.01667	2.18667	3.46333	0.36	0.435778	0.946345	4.31611	0.000125391	0.934569	0.845933	-3.28782	0.00212412	0.727131	0.878457
104880391	0.495	1.77	0.37	0.516667	0.256667	0.495	0.736667	0.523333	0.963333	1.88667	-0.153531	0.976337	2.01692	0.414164	-0.416205	0.930569	-0.853598	0.328615	-3.35108	0.00880399
104880450	1.845	19.37	25.89	17.7233	16.39	21.325	24.53	23.2567	24.3833	12.59	-3.69099	1.17193e-09	-0.0550457	0.973999	0.181959	0.921295	-0.370274	0.0357714	0.281171	0.739593
104880466	0.355	0.33	0.283333	3.93333	4.38667	0.3	0.48	2.07667	11.6367	13.04	0.0331031	0.995374	-0.0750121	0.973999	-2.86092	4.7073e-09	-1.47506	5.20902e-06	-1.55073	0.0547967
104880620	30.205	3.06	1.51667	0.02	0	4.455	3.81333	1.04333	0.203333	0.65	2.57283	0.162053	0.109078	0.973999	0.545035	0.819109	-3.32514	0.205876	-21.6863	9.8304e-06
104880688	195.265	25.8633	16.6033	3.60333	0.75	38.38	57.9033	4.51667	3.24667	5.43667	2.22764	0.148552	-0.845528	0.727258	1.92422	0.0020804	0.223374	0.940001	-3.09272	0.0455437
104880693	20.775	1.19	0.483333	0.496667	1.35333	1.065	1.93333	1.96667	1.30333	1.90333	4.14564	2.14154e-06	-0.242483	0.960578	-2.01516	0.0510695	-1.28549	0.247396	-0.475375	0.736363
104880827	4.575	6.3	5.69667	28.2767	43.0967	4.975	6.33667	6.57	10.82	30.9667	-0.276057	0.910275	0.511804	0.847005	-0.19406	0.893467	1.48733	0.000234301	0.411114	0.211451
104880884	0.785	2.14	0	0.513333	0.273333	0.645	0.696667	2.09667	0.66	0.64	0.0993766	0.991202	2.1166	0.209914	-6.81039	0.00286788	-0.269846	0.940001	-1.12996	0.703958
104880886	2.02	3.31667	4.79667	7.02667	8.12667	6.88	6.46	6.89333	3.79667	4.08333	-1.88563	0.00481155	-0.679477	0.500146	-0.501105	0.330323	0.986047	0.000859567	0.867639	0.126266
104880924	5.56	20.8367	35.79	8.19	5.79667	21.635	26.39	23.8733	21.3167	5.05667	-2.09972	0.00802877	-0.0935667	0.973999	0.623249	0.241176	-1.25776	0.00181996	0.125393	0.917628
104880977	7.27	12.5333	11.28	2.73333	3.68667	2.6	6.05	3.91333	10.2967	7.12333	1.41128	0.381989	1.53123	0.126407	1.55589	0.000749822	-1.80806	0.000126749	-1.19827	0.231582
104881029	2203.85	867.42	430.073	218.603	53.38	563.56	226.733	215.603	604.637	508.427	1.89248	0.0345466	2.51537	0.00845009	1.00701	0.000858094	-1.36871	1.29607e-29	-3.19433	0.00012144
104881244	1.54	1.40667	1.06667	0.436667	0.246667	0.935	1.30333	1.16333	1.37	0.833333	0.54347	0.884644	0.442056	0.880413	-0.0995196	0.970121	-1.5623	0.0074455	-1.73818	0.110682
104881245	4.335	4.84333	4.45	1.29667	0.32	2.82	3.03333	2.14	3.44	1.23	0.555361	0.847723	0.897584	0.498922	1.06812	0.0384259	-1.30628	0.00131733	-1.98205	0.00473948
104881300	44.55	222.637	33.2167	10.4133	3.56	52.555	125.947	72.3333	69.6333	7.3	-0.476381	0.902027	1.19701	0.253574	-1.11241	0.81542	-2.64833	8.72599e-09	-1.02433	0.190249
104881366	27.255	5.43	5.34667	2.62333	0.61	4.875	7.93	3.44667	2.4	3.53667	2.35526	0.0190163	-0.208982	0.943906	0.64339	0.248934	0.210159	0.940001	-2.90537	0.0080008
104881373	2.1	3.69333	2.47	0.463333	0.196667	0.36	6.25333	1.09333	5.88667	3.51667	2.48514	0.597281	-0.504369	0.821485	1.15416	0.685379	-3.5807	6.53504e-05	-4.53318	0.00206917
104881379	0.285	0.0833333	0.543333	0.946667	1.18	0.31	0.553333	1.94333	2.21333	1.98	-0.358821	0.949755	-2.40815	0.163653	-1.83026	0.000522996	-1.13405	0.118574	-0.616117	0.77837
104881400	2.345	0.523333	0.3	0.343333	1.41	0.93	0.773333	0.33	0.41	0.173333	1.19204	0.580349	-0.239271	0.960578	-0.0945311	0.987319	-0.173619	0.940001	2.86862	0.00623862
104881423	15.91	12.1467	1.82667	1.52667	1.53667	3.67	1.06667	0.563333	0.316667	0.39	1.9233	0.0823108	3.99874	1.21731e-09	1.70666	0.38287	2.36809	0.00294907	1.86672	0.0784038
104881462	3.335	2.03333	0.97	0.103333	0.04	0.85	0.556667	0.39	0.726667	0.34	1.87234	0.130964	2.3003	0.000995168	1.30771	0.357325	-2.73636	0.025818	-3.30101	0.117001
104881563	1.89	1.07667	0.0333333	0	0	10.555	6.94	1.26333	0.4	0.0666667	-2.68618	0.226856	-2.22989	0.0684364	-5.21058	0.00437311	-5.31481	0.0625226	-3.0823	0.74554
104881674	6.55	77.6233	78.6	57.7067	68.3367	61.35	66.1667	67.8133	41.1033	28.38	-3.37976	5.74841e-14	0.458083	0.820133	0.236744	0.74865	0.590149	0.0045764	1.31162	0.0266342
104881677	13.715	4.17667	1.76	0.936667	0.37	1.99	5.42333	0.993333	1.24667	1.32	2.64978	0.000354193	-0.0947091	0.973999	0.870449	0.208203	-0.300445	0.8257	-1.9621	0.00860212
104881703	8.5	13.2633	20.08	29.0267	37.65	17.78	20.4967	22.4167	26.2333	32.3733	-1.21582	0.00689897	-0.348171	0.738962	-0.15446	0.778186	0.242176	0.24321	0.245945	0.801514
104881753	0.515	0.873333	1.86	9.66667	12.2467	2.16	4.05667	4.07333	9.54333	11.5133	-2.12973	0.687483	-1.8469	0.00877746	-1.12132	0.15156	0.119781	0.904959	0.146497	0.921974
104881904	12.31	76.8667	83.2467	36.1067	16.0633	91.06	63.88	51.5233	15.6733	13.86	-3.01333	3.47956e-17	0.637399	0.253175	0.729133	0.145087	1.32399	2.9326e-07	-0.176156	0.935836
104881922	0.33	0.28	1.20333	2.11	4.64	0.635	2.08	4.36667	5.87667	3.68333	-1.00298	0.888549	-2.52417	0.0675895	-1.85238	0.0877942	-1.35939	0.000700982	0.476999	0.847283
104881928	3.52	5.05333	3.55	18.8233	25.6533	9.7	6.47	12.6867	19.4767	30.68	-1.61986	0.08019	-0.0265285	0.979806	-1.81211	1.30668e-07	0.0517422	0.949977	-0.108858	0.953542
104882465	1.03	21.8767	24.0233	7.67	4.89333	7.665	9.11333	5.48333	1.31333	2.87	-3.07959	1.64187e-05	1.63228	0.0542638	2.18759	7.26558e-05	2.65629	7.25793e-12	0.280173	0.935836
104882517	2.64	8.36	12.3767	7.41	4.25667	20.65	7.84333	8.56333	5.90667	3.56333	-3.08281	4.83982e-06	0.491373	0.868053	0.585627	0.738223	0.416931	0.636527	-0.28655	0.935836
104882692	0.165	0.4	0.57	1.47	1.65667	0.61	0.73	2.42667	1.42667	2.37	-2.08	0.540379	-0.510305	0.848276	-2.07033	0.00232042	0.134474	0.935007	-0.373854	0.892872
104882706	120.865	180.997	305.717	489.023	524.16	276.98	340.813	394.487	452.357	420.727	-1.32962	0.00787585	-0.626689	0.334299	-0.348793	0.0736652	0.208572	0.16167	0.341568	0.627529
104882737	22.91	0.43	0.253333	0.123333	0.0433333	0.45	0.656667	0.123333	0.286667	0.09	5.62496	0.00309662	-0.40649	0.960578	1.32186	0.822483	-1.3547	0.829489	-1.21422	0.868898
104882760	0	0.0133333	0.0466667	2.87667	3.95333	0.455	1.00667	4.35667	6.47667	5.98667	-6.36798	0.457346	-5.81832	0.00482859	-6.53651	7.39927e-08	-1.08198	0.13562	-0.569044	0.506642
109121380	9.28	9.85333	7.17	4.75333	4.5	6.535	4.62667	5.28	7.94667	7.57333	0.324463	0.926237	1.5399	0.00359279	0.463143	0.289842	-0.644859	0.0323306	-0.849653	0.0652262
109121390	16.6	7.68333	5.96	9.40333	8.69	4.225	4.55	1.5	9.96667	13.18	1.89257	0.0311011	1.04407	0.228413	1.99552	5.85757e-06	0.0129725	0.986771	-0.60682	0.302877
109121396	11.78	64.6433	87.8133	54.0667	34.9567	32.1	74.3267	89.5733	78.44	24.5167	-1.59758	0.00657276	0.0460906	0.976938	-0.0162522	0.999362	-0.435358	0.404276	0.572847	0.630981
109121404	0.085	0.54	0.0733333	5.77	0.126667	0.83	0.21	2.38	0.0433333	1.47667	-3.41652	0.387963	2.22812	0.654792	-5.3197	1.54471e-05	7.12243	0.200765	-4.43652	0.0967278
109121423	2.675	0.263333	0.17	0.03	0.04	0.14	0.0933333	0.0933333	0.07	0.0133333	4.29315	0.00815167	1.88592	0.222311	0.849417	0.84039	-0.848212	0.880413	1.04509	0.872295
109121428	17.975	9.68333	9.66	12.8333	8.71333	18.905	11.1467	7.27667	3.93333	2.86333	-0.148868	0.952351	-0.00424793	0.998109	0.425757	0.460838	1.80569	0.000470109	1.59157	0.00407097
109121432	1.465	1.28	1.12333	6.74333	3.19333	2.57	2.19	1.93333	2.44	4.04667	-0.915611	0.728339	-0.486235	0.850324	-0.755356	0.738626	1.56367	0.00105868	-0.700272	0.726104
109121456	0.25	0.713333	2.44333	30.46	38.71	2.425	6.02333	20.22	46.9167	36.55	-3.33478	0.292506	-2.74145	6.84983e-06	-3.02593	5.80285e-17	-0.532045	0.0753829	0.111417	0.935836
109121485	1.09	14.5567	14.0433	11.81	6.26667	15.915	11.9733	10.4833	6.03667	7.58333	-4.01745	7.01554e-08	0.653614	0.264545	0.455207	0.451704	1.07121	0.000588701	-0.736698	0.752565
109121544	40.1	1.08	0.256667	0.0533333	0.0266667	0.88	0.266667	0.113333	0.1	0.05	5.37481	0.000766462	2.48033	0.0524622	1.18932	0.881482	-0.85188	0.842136	-1.41757	0.875957
109121674	66.82	14.8233	2.24667	1.41667	0.22	3.63	4.51	2.08667	2.50667	7.70667	4.06614	3.20352e-14	2.4204	0.107051	0.150087	0.970121	-0.748999	0.73384	-5.75261	0.00120243
109121902	1.44	12.4267	10.2233	6.81	6.14333	14.9	13.0133	12.6767	10.2367	4.63667	-3.56028	0.000861573	0.172972	0.97155	-0.275618	0.862718	-0.480763	0.573152	0.434304	0.68113
109121948	0	0	0.04	0.0333333	0.0133333	0	0.0466667	0.1	0.336667	0.68			-2.90204	0.888778	-1.33239	0.800897	-3.31283	0.0566146	-5.49971	0.000319971
109121990	2.17	2.3	3.39	8.57667	4.72667	10.185	6.42	4.56	3.83667	3.98333	-2.37476	0.00165981	-1.22577	0.113465	-0.411699	0.589865	1.26121	9.80857e-06	-0.0614004	0.97595
109122015	3.26	1.80333	10.7433	20.4233	22.4333	3.635	6.83	23.6567	10.7	4.65333	-0.342081	0.946345	-1.61701	0.249425	-1.11937	0.483793	1.03752	0.218964	2.12575	0.000255415
109122214	0.49	2.21	0.84	1.25667	1.18	0.515	2.54	0.98	2.38	5.08	-0.196745	0.966076	0.582155	0.933109	-0.218736	0.952827	-0.840478	0.169092	-2.29624	3.34304e-05
109122310	0.235	0.613333	0.343333	0.53	0.39	0.215	0.913333	0.453333	0.72	2.11333	0.0820953	0.991202	0.170712	0.973999	-0.413624	0.929793	-0.375212	0.791131	-2.67001	0.00154273
109122358	7.645	24.4533	60.0933	57.45	61.12	14.775	24.6	24.6033	45.74	46.9367	-1.18072	0.539576	0.260656	0.937641	1.30839	1.91831e-05	0.423921	0.21816	0.388556	0.660911
109122626	1.325	14.8567	3.83667	1.85333	3.93333	34.01	11.9167	4.08333	0.483333	1.13	-4.84628	0.000405556	0.86376	0.698043	-0.0443821	0.999362	2.21446	0.111628	1.31921	0.658582
109122654	1.265	1.59333	2.63333	1.49667	0.926667	2.93	2.81333	2.98333	3.74	1.78333	-1.23134	0.7356	-0.51504	0.787876	-0.16067	0.970121	-1.22328	0.000369549	-1.06867	0.0978348
109122656	35.51	2.27	0.373333	0.0666667	0.0666667	2.095	0.683333	0.143333	0.156667	0.216667	3.97868	4.17091e-05	2.14975	0.166854	1.39161	0.677063	-1.10409	0.751351	-1.62282	0.581414
109122718	23.585	63.3333	88.5	74.8	79.8233	93.71	81.4033	92.82	74.5933	50.1467	-2.2424	0.00238699	-0.222493	0.960578	-0.0263594	0.980185	0.129653	0.749688	0.617282	0.207752
109122796	93.09	32.0867	51.0767	39.9933	42.7	28.895	34.3	49.52	65.8267	38.5967	1.53112	0.000517023	0.217077	0.911117	0.0620854	0.970121	-0.624115	0.000136411	0.171654	0.86013
109122861	2.095	2.46	3.01333	4.22333	2.98333	6.445	5.66	4.34	4.87333	2.58667	-1.77063	0.00174705	-0.929378	0.235882	-0.513801	0.260578	-0.109284	0.880413	0.128619	0.899871
109122894	0.785	12.8333	6.78667	7.96	2.18333	0.325	0.703333	4.11667	11.9433	7.53	1.15569	0.895372	4.45869	1.22455e-05	0.744027	0.732584	-0.485378	0.682216	-1.79115	0.0096862
109122965	3.375	4.06667	3.99667	1.58	1.59333	2.965	3.63333	4.09333	3.99333	1.56333	0.0669121	0.979958	0.617503	0.590769	0.0016249	0.999362	-1.23821	2.97781e-05	0.0110066	0.994757
109124071	0.115	0.79	0.453333	0.62	0.423333	0.205	0.183333	0.253333	0.78	0.786667	-1.06783	0.781493	2.6213	0.00368235	0.844395	0.42206	-0.241883	0.880413	-1.0205	0.29412
