# Supplementary material for: Effect of Climate on Volatile Metabolism in ‘Red Globe’ Grapes (Vitis vinifera L.) during Fruit Development
Source: Foods. 2022 May 16;11(10):1435. doi: 10.3390/foods11101435 (PMC9140514; doi:10.3390/foods11101435)
Supplement: Supplementary file 1 [file foods-11-01435-s001.zip › Table S6.xlsx]

## Sheet: Sheet1
Table S6. KEGG classification of DEGs. TS: Turpan sample; US: Urumqi sample; S: stage
KEGG pathway	DEGs highly expressed in US					DEGs highly expressed in TS
	S1	S2	S3	S4	S5	S1	S2	S3	S4	S5
Metabolic pathways	32	16	23	35	11	18	6	25	24	34
Biosynthesis of secondary metabolites	24	8	15	27	11	14	4	29	14	24
Protein processing in endoplasmic reticulum	12	11	1	1	0	1	0	11	19	9
Biosynthesis of antibiotics	6	2	1	10	3	0	1	0	4	8
Plant hormone signal transduction	4	2	5	8	2	4	4	12	9	5
Photosynthesis - antenna proteins	7	3	4	1	2	0	0	0	0	0
Phenylpropanoid biosynthesis	4	0	2	8	3	3	0	4	5	5
Microbial metabolism in diverse environments	4	2	3	5	3	0	0	2	3	5
Plant-pathogen interaction	8	1	3	4	0	1	3	3	4	10
Glutathione metabolism	6	1	1	3	3	0	0	1	1	0
MAPK signaling pathway - plant	3	1	5	4	0	2	3	2	3	2
Platinum drug resistance	5	0	2	3	2	2	1	1	0	0
Fluid shear stress and atherosclerosis	5	1	2	2	2	0	0	3	2	1
Pathways in cancer	5	1	1	3	2	0	0	3	2	1
Cysteine and methionine metabolism	5	0	2	3	1	1	0	0	1	0
Hepatocellular carcinoma	5	0	1	3	2	0	0	1	0	0
Biosynthesis of amino acids	5	2	1	3	0	0	1	1	3	4
Metabolism of xenobiotics by cytochrome P450	5	0	1	2	2	0	0	1	0	0
Chemical carcinogenesis	5	0	1	2	2	0	0	1	0	0
Drug metabolism - cytochrome P450	5	0	1	2	2	0	0	1	0	0
Drug metabolism - other enzymes	5	0	1	2	2	0	0	1	0	0
Starch and sucrose metabolism	2	1	2	4	1	1	0	0	5	3
Carbon metabolism	1	2	1	4	2	0	1	0	1	3
Galactose metabolism	4	2	2	1	0	1	0	1	3	0
Flavonoid biosynthesis	3	0	1	5	0	1	1	15	0	1
Glycerophospholipid metabolism	4	1	1	2	0	0	1	0	1	1
alpha-Linolenic acid metabolism	3	2	1	1	1	0	0	0	0	1
Tyrosine metabolism	3	0	2	0	1	0	0	0	1	1
Phenylalanine metabolism	2	0	1	3	0	0	0	3	1	1
NOD-like receptor signaling pathway	1	1	4	0	0	0	0	2	4	2
Peroxisome	1	1	0	3	1	0	0	0	1	1
Circadian rhythm - plant	0	0	0	5	1	1	3	15	0	0
Longevity regulating pathway - multiple species	3	0	0	2	0	0	0	1	3	0
Measles	3	0	2	0	0	0	0	1	2	1
Glycerolipid metabolism	3	0	1	1	0	1	1	0	1	2
Glycolysis / Gluconeogenesis	3	0	1	0	1	0	0	0	1	2
Phenylalanine, tyrosine and tryptophan biosynthesis	2	1	0	2	0	0	0	0	0	0
Toxoplasmosis	2	0	3	0	0	0	0	1	2	2
Endocytosis	2	0	1	0	2	0	0	3	2	1
Glycine, serine and threonine metabolism	1	0	1	2	1	0	1	0	0	1
Insulin resistance	0	1	3	1	0	0	0	0	1	0
Glyoxylate and dicarboxylate metabolism	0	1	1	3	0	0	1	0	0	2
Pentose and glucuronate interconversions	0	1	2	1	1	1	0	0	0	2
Tryptophan metabolism	0	0	2	3	0	2	0	0	1	1
Estrogen signaling pathway	3	1	0	0	0	0	0	3	3	1
Legionellosis	3	0	0	0	1	0	0	1	1	0
Zeatin biosynthesis	2	0	1	1	0	0	0	2	0	0
Nitrogen metabolism	2	1	0	1	0	1	0	1	1	1
GABAergic synapse	2	0	1	0	1	1	0	1	0	0
Fatty acid degradation	2	0	1	0	1	0	0	0	1	2
Quorum sensing	2	0	0	1	1	1	0	1	0	0
2-Oxocarboxylic acid metabolism	2	1	1	0	0	1	0	0	0	1
Influenza A	2	0	2	0	0	0	0	1	2	1
MAPK signaling pathway	2	0	2	0	0	0	1	1	3	1
Ubiquitin mediated proteolysis	2	0	0	1	1	2	1	1	0	1
Tropane, piperidine and pyridine alkaloid biosynthesis	1	1	2	0	0	1	0	0	0	2
Longevity regulating pathway - worm	1	0	0	2	1	0	0	0	0	0
Arginine and proline metabolism	1	0	1	2	0	0	0	0	2	1
Porphyrin and chlorophyll metabolism	0	0	3	1	0	0	0	0	0	0
Sulfur metabolism	0	0	0	4	0	0	0	1	0	0
Inositol phosphate metabolism	3	0	0	0	0	1	0	0	0	2
Spliceosome	3	0	0	0	0	0	0	1	2	0
Ascorbate and aldarate metabolism	2	1	0	0	0	3	0	0	2	4
Antigen processing and presentation	2	1	0	0	0	1	0	3	3	1
Nicotine addiction	1	0	1	0	1	1	0	0	0	0
Morphine addiction	1	0	1	0	1	1	0	0	0	0
p53 signaling pathway	1	0	0	1	1	0	0	0	0	0
Valine, leucine and isoleucine degradation	1	0	0	1	1	0	0	0	1	2
Retrograde endocannabinoid signaling	1	0	1	0	1	2	1	0	0	0
Synaptic vesicle cycle	1	0	1	0	1	1	0	0	0	0
Cellular senescence	1	0	1	1	0	0	0	0	2	0
Pyruvate metabolism	1	1	0	0	1	0	0	0	1	2
Tuberculosis	1	0	2	0	0	1	0	0	2	1
Carbon fixation in photosynthetic organisms	0	2	1	0	0	0	0	0	1	1
Terpenoid backbone biosynthesis	0	1	0	1	1	0	0	0	0	1
Vitamin B6 metabolism	0	0	1	2	0	0	0	0	0	0
Hepatitis B	0	0	2	1	0	0	0	0	1	1
Epstein-Barr virus infection	0	0	2	1	0	0	0	0	2	1
Alanine, aspartate and glutamate metabolism	0	0	0	2	1	0	1	2	1	2
Wnt signaling pathway	0	0	0	1	2	0	0	0	1	0
Ether lipid metabolism	2	0	0	0	0	0	0	0	0	0
Thyroid hormone signaling pathway	2	0	0	0	0	0	0	0	0	1
Protein digestion and absorption	1	0	0	1	0	0	0	0	0	0
Brassinosteroid biosynthesis	1	1	0	0	0	1	0	0	0	0
Pantothenate and CoA biosynthesis	1	0	0	1	0	1	0	0	0	0
Isoquinoline alkaloid biosynthesis	1	0	1	0	0	0	0	0	1	1
Arginine biosynthesis	1	1	0	0	0	0	0	0	0	0
Propanoate metabolism	1	0	0	0	1	0	0	0	0	0
Stilbenoid, diarylheptanoid and gingerol biosynthesis	1	0	0	1	0	0	0	5	0	0
Progesterone-mediated oocyte maturation	1	1	0	0	0	0	0	2	2	1
Transcriptional misregulation in cancer	1	0	0	1	0	0	0	0	0	0
Ubiquinone and other terpenoid-quinone biosynthesis	1	0	0	1	0	3	0	0	1	0
Calcium signaling pathway	1	0	1	0	0	0	0	0	2	1
Pyrimidine metabolism	1	0	0	1	0	0	0	0	1	0
Fructose and mannose metabolism	1	0	1	0	0	0	0	0	0	0
Oxidative phosphorylation	1	0	1	0	0	1	2	0	0	0
Cell cycle	1	0	0	1	0	0	0	0	0	0
Amino sugar and nucleotide sugar metabolism	1	0	1	0	0	1	0	0	4	6
Sphingolipid metabolism	0	2	0	0	0	0	0	0	1	1
Photosynthesis	0	2	0	0	0	0	1	0	0	0
Sphingolipid signaling pathway	0	2	0	0	0	1	0	0	1	1
Carbon fixation pathways in prokaryotes	0	1	0	0	1	0	0	0	0	1
Prostate cancer	0	1	0	1	0	0	0	2	2	1
Fatty acid metabolism	0	1	0	0	1	0	0	1	0	1
Necroptosis	0	1	0	1	0	0	0	2	2	1
NF-kappa B signaling pathway	0	0	2	0	0	0	0	0	1	1
Toll-like receptor signaling pathway	0	0	2	0	0	0	0	0	1	1
Toll and Imd signaling pathway	0	0	2	0	0	0	0	0	1	1
Leishmaniasis	0	0	2	0	0	0	0	0	1	1
Neurotrophin signaling pathway	0	0	2	0	0	0	0	0	1	1
Pertussis	0	0	2	0	0	0	0	0	1	1
Chagas disease (American trypanosomiasis)	0	0	2	0	0	0	0	0	1	1
Selenocompound metabolism	0	0	1	1	0	0	0	0	0	0
Antifolate resistance	0	0	1	1	0	2	0	0	0	0
Diterpenoid biosynthesis	0	0	1	0	1	0	0	1	0	1
Thiamine metabolism	0	0	1	1	0	0	0	0	0	0
ABC transporters	0	0	1	1	0	2	0	0	0	1
Vasopressin-regulated water reabsorption	0	0	1	0	1	1	0	0	0	0
Bile secretion	0	0	1	1	0	1	0	0	0	2
Human immunodeficiency virus 1 infection	0	0	2	0	0	0	0	0	2	1
Carotenoid biosynthesis	0	0	1	1	0	1	0	1	0	2
Pentose phosphate pathway	0	0	1	0	1	0	0	0	1	0
Lysosome	0	0	1	1	0	1	0	0	1	1
Insulin signaling pathway	0	0	1	1	0	0	0	0	0	0
Renin-angiotensin system	0	0	0	2	0	0	0	0	0	0
MAPK signaling pathway - yeast	0	0	0	2	0	0	0	0	1	0
FoxO signaling pathway	0	0	0	2	0	0	0	0	0	0
Longevity regulating pathway	0	0	0	2	0	0	0	0	0	0
Amyotrophic lateral sclerosis (ALS)	0	0	0	2	0	0	0	0	2	0
Systemic lupus erythematosus	0	0	0	2	0	0	0	0	0	0
Cyanoamino acid metabolism	0	0	0	2	0	2	0	1	1	2
Alcoholism	0	0	0	2	0	0	0	0	0	0
Steroid biosynthesis	0	0	0	1	1	1	0	0	1	2
Novobiocin biosynthesis	1	0	0	0	0	0	0	0	0	0
Type I diabetes mellitus	1	0	0	0	0	0	0	1	0	0
Riboflavin metabolism	1	0	0	0	0	0	0	0	0	0
Valine, leucine and isoleucine biosynthesis	1	0	0	0	0	0	0	0	0	0
Histidine metabolism	1	0	0	0	0	0	0	0	1	1
Gap junction	1	0	0	0	0	0	0	0	0	2
Folate biosynthesis	1	0	0	0	0	0	0	0	0	0
Glutamatergic synapse	1	0	0	0	0	0	0	0	1	0
Pathogenic Escherichia coli infection	1	0	0	0	0	0	0	0	0	2
Fatty acid elongation	1	0	0	0	0	0	0	0	1	3
Methane metabolism	1	0	0	0	0	0	0	0	0	0
Glucagon signaling pathway	1	0	0	0	0	0	0	0	1	1
Phagosome	1	0	0	0	0	0	0	0	0	2
Cell cycle - yeast	1	0	0	0	0	0	0	0	0	0
RNA degradation	1	0	0	0	0	1	0	0	0	0
Taurine and hypotaurine metabolism	0	1	0	0	0	0	0	2	0	0
Linoleic acid metabolism	0	1	0	0	0	0	0	0	0	1
Biosynthesis of unsaturated fatty acids	0	1	0	0	0	0	0	1	0	1
IL-17 signaling pathway	0	1	0	0	0	0	0	2	2	1
Th17 cell differentiation	0	1	0	0	0	0	0	2	3	1
PI3K-Akt signaling pathway	0	1	0	0	0	0	0	2	2	1
Glucosinolate biosynthesis	0	0	1	0	0	1	0	0	0	0
Biofilm formation - Escherichia coli	0	0	1	0	0	0	0	0	1	0
Mineral absorption	0	0	1	0	0	1	0	0	0	0
Ferroptosis	0	0	1	0	0	0	0	0	0	0
beta-Alanine metabolism	0	0	1	0	0	0	0	1	1	2
Monobactam biosynthesis	0	0	0	1	0	0	0	0	0	0
Endocrine resistance	0	0	0	1	0	0	0	0	0	0
Melanoma	0	0	0	1	0	0	0	0	0	0
Bladder cancer	0	0	0	1	0	0	0	0	0	0
Non-small cell lung cancer	0	0	0	1	0	0	0	0	0	0
Chronic myeloid leukemia	0	0	0	1	0	0	0	0	0	0
Nicotinate and nicotinamide metabolism	0	0	0	1	0	0	0	0	0	0
Monoterpenoid biosynthesis	0	0	0	1	0	1	0	0	0	0
Degradation of aromatic compounds	0	0	0	1	0	0	0	0	0	0
Glioma	0	0	0	1	0	0	0	0	0	0
Small cell lung cancer	0	0	0	1	0	0	0	0	0	0
Breast cancer	0	0	0	1	0	0	0	0	0	0
Pancreatic cancer	0	0	0	1	0	0	0	0	0	0
Cushing syndrome	0	0	0	1	0	0	0	0	0	1
Gastric cancer	0	0	0	1	0	0	0	0	0	1
Hepatitis C	0	0	0	1	0	0	0	0	0	1
Basal transcription factors	0	0	0	1	0	0	0	0	0	0
Human cytomegalovirus infection	0	0	0	1	0	0	0	0	1	0
Kaposi sarcoma-associated herpesvirus infection	0	0	0	1	0	0	0	0	1	0
MicroRNAs in cancer	0	0	0	1	0	1	0	0	0	1
Choline metabolism in cancer	0	0	0	1	0	1	1	0	0	0
Purine metabolism	0	0	0	1	0	0	0	0	1	1
Viral carcinogenesis	0	0	0	1	0	0	0	0	0	1
Human T-cell leukemia virus 1 infection	0	0	0	1	0	1	0	0	1	0
Fatty acid biosynthesis	0	0	0	0	1	0	0	1	0	0
MAPK signaling pathway - fly	0	0	0	0	1	0	0	0	0	0
Phospholipase D signaling pathway	0	0	0	0	1	0	1	0	0	0
Hedgehog signaling pathway	0	0	0	0	1	1	0	0	0	0
Hedgehog signaling pathway - fly	0	0	0	0	1	1	0	0	0	1
Endocrine and other factor-regulated calcium reabsorption	0	0	0	0	1	0	0	0	0	0
Pancreatic secretion	0	0	0	0	1	0	0	0	0	0
Vibrio cholerae infection	0	0	0	0	1	0	0	0	0	0
Central carbon metabolism in cancer	0	0	0	0	1	0	0	0	0	1
Sesquiterpenoid and triterpenoid biosynthesis	0	0	0	0	0	0	0	1	1	2
Glycosaminoglycan degradation	0	0	0	0	0	1	0	0	1	1
Phosphatidylinositol signaling system	0	0	0	0	0	1	1	0	0	1
Cutin, suberine and wax biosynthesis	0	0	0	0	0	0	0	1	1	1
Other glycan degradation	0	0	0	0	0	0	0	0	1	2
mRNA surveillance pathway	0	0	0	0	0	2	0	0	0	0
DNA replication	0	0	0	0	0	1	1	0	0	0
Nucleotide excision repair	0	0	0	0	0	1	1	0	0	0
Parkinson disease	0	0	0	0	0	1	1	0	0	0
Thermogenesis	0	0	0	0	0	1	1	0	0	0
Prion diseases	0	0	0	0	0	0	0	0	2	0
Glycosphingolipid biosynthesis - ganglio series	0	0	0	0	0	0	0	0	1	1
Limonene and pinene degradation	0	0	0	0	0	0	0	0	1	1
Insect hormone biosynthesis	0	0	0	0	0	0	0	0	1	1
Glycosphingolipid biosynthesis - globo and isoglobo series	0	0	0	0	0	0	0	0	1	1
Chloroalkane and chloroalkene degradation	0	0	0	0	0	0	0	0	1	1
Lysine degradation	0	0	0	0	0	0	0	0	1	1
Various types of N-glycan biosynthesis	0	0	0	0	0	0	0	0	1	1
Vitamin digestion and absorption	0	0	0	0	0	1	0	0	0	0
Ras signaling pathway	0	0	0	0	0	1	0	0	0	0
Apoptosis	0	0	0	0	0	1	0	0	0	0
Proteoglycans in cancer	0	0	0	0	0	1	0	0	0	0
Mismatch repair	0	0	0	0	0	1	0	0	0	0
Homologous recombination	0	0	0	0	0	1	0	0	0	0
Fanconi anemia pathway	0	0	0	0	0	1	0	0	0	0
RNA transport	0	0	0	0	0	1	0	0	0	0
Base excision repair	0	0	0	0	0	0	1	0	0	0
Butanoate metabolism	0	0	0	0	0	0	0	1	0	0
Biosynthesis of ansamycins	0	0	0	0	0	0	0	0	1	0
Lipopolysaccharide biosynthesis	0	0	0	0	0	0	0	0	1	0
Th1 and Th2 cell differentiation	0	0	0	0	0	0	0	0	1	0
Thyroid hormone synthesis	0	0	0	0	0	0	0	0	1	0
VEGF signaling pathway	0	0	0	0	0	0	0	0	1	0
Osteoclast differentiation	0	0	0	0	0	0	0	0	1	0
C-type lectin receptor signaling pathway	0	0	0	0	0	0	0	0	1	0
Natural killer cell mediated cytotoxicity	0	0	0	0	0	0	0	0	1	0
T cell receptor signaling pathway	0	0	0	0	0	0	0	0	1	0
Renin secretion	0	0	0	0	0	0	0	0	1	0
Protein export	0	0	0	0	0	0	0	0	1	0
cGMP-PKG signaling pathway	0	0	0	0	0	0	0	0	1	0
Axon guidance	0	0	0	0	0	0	0	0	1	0
B cell receptor signaling pathway	0	0	0	0	0	0	0	0	1	0
Long-term potentiation	0	0	0	0	0	0	0	0	1	0
Oxytocin signaling pathway	0	0	0	0	0	0	0	0	1	0
Amphetamine addiction	0	0	0	0	0	0	0	0	1	0
Herpes simplex infection	0	0	0	0	0	0	0	0	1	0
Alzheimer disease	0	0	0	0	0	0	0	0	1	0
Oocyte meiosis	0	0	0	0	0	0	0	0	1	0
Huntington disease	0	0	0	0	0	0	0	0	1	0
Isoflavonoid biosynthesis	0	0	0	0	0	0	0	0	0	1
Jak-STAT signaling pathway	0	0	0	0	0	0	0	0	0	1
PPAR signaling pathway	0	0	0	0	0	0	0	0	0	1
Type II diabetes mellitus	0	0	0	0	0	0	0	0	0	1
AGE-RAGE signaling pathway in diabetic complications	0	0	0	0	0	0	0	0	0	1
Carbohydrate digestion and absorption	0	0	0	0	0	0	0	0	0	1
Citrate cycle (TCA cycle)	0	0	0	0	0	0	0	0	0	1
Autophagy - yeast	0	0	0	0	0	0	0	0	0	1
AMPK signaling pathway	0	0	0	0	0	0	0	0	0	1
Human papillomavirus infection	0	0	0	0	0	0	0	0	0	1
