# Supplementary material for: Effect of Climate on Volatile Metabolism in ‘Red Globe’ Grapes (Vitis vinifera L.) during Fruit Development
Source: Foods. 2022 May 16;11(10):1435. doi: 10.3390/foods11101435 (PMC9140514; doi:10.3390/foods11101435)
Supplement: Supplementary file 1 [file foods-11-01435-s001.zip › Table S7.xlsx]

## Sheet: Table S7
Table S7. The correlation value among transcription factors and volatiles.
A: In TS
Gene ID/Volatile NO.	3	4	9	11	12	13	14	15	16	21	23	25	27	28	31	36	42	44	47	50	52	54	56	58	60	61	62	64	70	71	73	74	77	78	80	83
100264000	-0.59576	0.52573	0.98356	-0.74453	0.25873	0.4797	-0.90707	-0.49309	0.58696	0.63557	0.5107	0.77989	-0.93179	-0.66499	0.44168	0.66106	0.86742	0.37979	0.91494	0.77308	0.64811	0.9723	0.98734	0.80207	-0.97608	0.53262	0.44168	-0.84392	0.96686	-0.22741	0.63005	-0.80115	-0.59576	-0.08046	0.77541	-0.58476
100263252	-0.13513	-0.22532	-0.62005	0.96127	-0.81618	-0.10085	0.92829	0.8418	-0.13049	-0.22838	-0.77809	-0.81104	0.52719	0.97402	-0.22517	-0.05236	-0.4472	0.03694	-0.78962	-0.84198	-0.12913	-0.5627	-0.62197	-0.36739	0.64973	-0.14362	-0.22517	0.92083	-0.58553	-0.13749	-0.20347	0.84126	-0.13513	0.73904	-0.83683	0.95996
100243201	-0.31304	0.53097	0.66359	-0.16086	-0.18392	0.18057	-0.47339	-0.00217	0.57374	0.82813	-0.16262	0.70787	-0.64288	-0.27566	0.98854	0.43952	0.69569	0.26788	0.71514	0.35751	0.65	0.53064	0.56412	0.71996	-0.60727	0.44439	0.98854	-0.44459	0.52281	-0.35366	0.67847	-0.52899	-0.31304	0.20036	0.65689	-0.35047
100266006	0.1896	-0.70522	-0.89309	0.8549	-0.55185	-0.56458	0.93221	0.76496	-0.66168	-0.71408	-0.69853	-0.9654	0.89147	0.87575	-0.47244	-0.57929	-0.86524	-0.48116	-0.97612	-0.96046	-0.66505	-0.86543	-0.89162	-0.82407	0.79734	-0.65108	-0.47244	0.97664	-0.88752	-0.16899	-0.71609	0.98876	0.1896	0.42749	-0.9723	0.84298
100258060	0.63224	0.57416	-0.04891	-0.31011	0.61933	0.5154	-0.09842	-0.6694	0.38218	0.25776	0.57285	0.38092	-0.1067	-0.44977	-0.11903	0.13409	0.17621	0.51314	0.17424	0.52506	0.24539	-0.00657	-0.01439	0.22021	0.28685	0.50471	-0.11903	-0.35175	0.05311	0.954	0.35836	-0.47107	0.63224	-0.66005	0.41601	-0.48007
100245740	0.64509	0.09971	0.05511	-0.75233	0.99105	0.09394	-0.48705	-0.90392	-0.09466	-0.15177	0.85883	0.44117	-0.04961	-0.80095	-0.29922	-0.23783	0.0015	-0.03753	0.30112	0.64749	-0.19185	0.06646	0.10319	-0.04614	-0.01315	0.02436	-0.29922	-0.60492	0.11493	0.68009	-0.08362	-0.55934	0.64509	-0.99063	0.49751	-0.7965
100258873	0.38612	0.28076	0.32303	-0.89171	0.97675	0.31254	-0.67212	-0.98221	0.12434	0.03718	0.97159	0.58305	-0.32375	-0.89456	-0.23853	0.03586	0.26126	0.15582	0.50256	0.8202	0.0429	0.35726	0.38391	0.2002	-0.26399	0.23263	-0.23853	-0.77659	0.40156	0.62007	0.12804	-0.72649	0.38612	-0.91112	0.63796	-0.84858
100264647	-0.36443	0.96072	0.63322	-0.13441	-0.12176	0.83134	-0.30204	-0.19953	0.98268	0.96	0.12984	0.60195	-0.77531	-0.2013	0.56792	0.88129	0.86213	0.89904	0.60068	0.51854	0.97475	0.64746	0.61657	0.91618	-0.39679	0.95216	0.56792	-0.42394	0.6622	0.20812	0.98589	-0.58219	-0.36443	0.19903	0.57744	-0.193
100256849	-0.48057	0.94019	0.6372	-0.18585	-0.08654	0.95286	-0.29358	-0.25213	0.98111	0.85289	0.26309	0.48627	-0.79211	-0.17913	0.30544	0.96757	0.85167	0.97433	0.53182	0.53738	0.96224	0.71256	0.66215	0.88817	-0.40397	0.9821	0.30544	-0.41362	0.72605	0.26786	0.94457	-0.54282	-0.48057	0.21114	0.4762	-0.11356
100246583	0.40408	-0.61661	-0.96223	0.84227	-0.43905	-0.53638	0.95427	0.66491	-0.62498	-0.66714	-0.64854	-0.88725	0.93226	0.8035	-0.4331	-0.63007	-0.87986	-0.43341	-0.96613	-0.89854	-0.65659	-0.94774	-0.96843	-0.82092	0.91402	-0.59632	-0.4331	0.94275	-0.95647	0.02197	-0.67187	0.91969	0.40408	0.27882	-0.89113	0.73927
100261077	0.99181	-0.27436	-0.60051	-0.09045	0.60784	-0.35362	0.18411	-0.36477	-0.48325	-0.47725	0.2589	-0.072	0.58854	-0.23251	-0.33779	-0.70684	-0.56959	-0.36364	-0.30399	-0.00263	-0.59029	-0.63193	-0.5957	-0.55568	0.6216	-0.37716	-0.33779	0.05441	-0.58951	0.63012	-0.47099	0.04863	0.99181	-0.75846	-0.03424	-0.32334
100252547	-0.54239	0.86882	0.88981	-0.55984	0.17366	0.86941	-0.67379	-0.4981	0.90663	0.82982	0.51752	0.72164	-0.96614	-0.51463	0.35077	0.92788	0.96606	0.81705	0.80633	0.78695	0.91252	0.94086	0.91714	0.95164	-0.73118	0.89684	0.35077	-0.73325	0.95185	0.14097	0.90053	-0.78868	-0.54239	-0.00254	0.7203	-0.42723
B: In US
Gene ID/Volatile NO.	1	3	7	10	16	18	21	24	30	31	32	39	40	43	47	52	56	57	58	59	62	63	64	65	68	69	70	75	80	83
100264000	-0.99171	0.2269	-0.90404	-0.11706	-0.8339	-0.2188	-0.79386	-0.64652	0.19609	-0.63068	-0.33105	-0.75664	-0.93343	-0.76718	-0.74271	-0.88425	-0.74475	-0.98518	-0.91169	-0.93343	-0.81297	-0.93343	-0.58287	-0.78262	0.16184	-0.73515	-0.74422	-0.87009	-0.62636	-0.9336
100263252	-0.41073	0.87918	-0.75862	-0.69928	-0.65859	-0.95069	-0.78871	-0.73603	0.96503	-0.82832	-0.7304	-0.56557	-0.48283	-0.56922	-0.5827	-0.72811	-0.63058	-0.44436	-0.71722	-0.48283	-0.77009	-0.48283	-0.74748	-0.61867	-0.39086	-0.70679	-0.60327	-0.60781	-0.77769	-0.48154
100243201	0.75314	-0.66614	0.80858	0.56387	0.79546	0.5073	0.94055	0.96489	-0.57727	0.95958	0.80093	0.96477	0.90531	0.96579	0.97369	0.92834	0.97477	0.75064	0.90958	0.90531	0.99575	0.90531	0.94048	0.97655	-0.15004	0.98769	0.96155	0.97658	0.94755	0.82475
100244353	0.69764	-0.78503	0.85792	0.72718	0.95225	0.62982	0.99726	0.79852	-0.63334	0.82966	0.83457	0.8833	0.87028	0.88987	0.84505	0.97678	0.91824	0.80339	0.95951	0.87028	0.93166	0.87028	0.7608	0.8194	0.21454	0.84456	0.92015	0.88811	0.95418	0.89268
100255447	-0.31083	-0.36842	0.06403	0.39899	0.20469	0.51059	0.02405	-0.41761	-0.36096	-0.29147	0.04247	-0.37471	-0.31467	-0.36344	-0.45331	-0.02447	-0.29502	-0.09419	-0.01873	-0.31467	-0.23647	-0.31467	-0.41821	-0.48517	0.9877	-0.41016	-0.27719	-0.37174	-0.07089	-0.08463
100852860	0.90378	-0.41254	0.82754	0.35656	0.85941	0.2404	0.89575	0.80706	-0.26829	0.77437	0.60194	0.93941	0.99961	0.94493	0.92054	0.9393	0.92832	0.92187	0.93742	0.99961	0.9209	0.99961	0.75157	0.91641	-0.22308	0.88053	0.93094	0.97683	0.82443	0.96042
100266006	-0.05138	0.95184	-0.34523	-0.97548	-0.54887	-0.68429	-0.70578	-0.64021	0.74574	-0.68601	-0.97232	-0.63809	-0.39961	-0.6344	-0.60814	-0.57664	-0.69397	-0.18797	-0.51575	-0.39961	-0.62839	-0.39961	-0.65311	-0.52765	-0.34806	-0.61021	-0.69363	-0.51524	-0.84783	-0.39055
100258060	0.86646	-0.54557	0.86148	0.46946	0.88281	0.38571	0.94896	0.87054	-0.41998	0.85564	0.69832	0.95903	0.98291	0.96391	0.94534	0.97116	0.96068	0.89023	0.96397	0.98291	0.97014	0.98291	0.82449	0.94317	-0.13957	0.9284	0.95829	0.99074	0.8959	0.94187
100245740	0.86385	-0.54115	0.85378	0.46798	0.87828	0.37509	0.94608	0.87153	-0.41132	0.8546	0.69965	0.96248	0.98397	0.96715	0.94879	0.96797	0.96311	0.887	0.96008	0.98397	0.96886	0.98397	0.82543	0.94522	-0.15023	0.92944	0.961	0.99183	0.89594	0.94073
100256849	0.42087	-0.83002	0.62531	0.69613	0.56665	0.72289	0.80166	0.93852	-0.82271	0.96895	0.86628	0.78806	0.60592	0.78405	0.8249	0.72714	0.82221	0.40089	0.69314	0.60592	0.87325	0.60592	0.95453	0.83452	-0.01025	0.89906	0.79401	0.7686	0.89389	0.50053
100261077	0.89192	-0.53804	0.97301	0.42822	0.95963	0.51894	0.93218	0.7003	-0.48307	0.72787	0.55805	0.78756	0.90722	0.79893	0.75724	0.97535	0.80872	0.95362	0.98935	0.90722	0.88565	0.90722	0.64639	0.7775	0.142	0.773	0.80835	0.87391	0.78701	0.94824
100252547	0.83764	-0.55055	0.82594	0.46038	0.81778	0.38716	0.92748	0.92641	-0.44613	0.90578	0.71795	0.97334	0.96206	0.97582	0.9757	0.94102	0.97175	0.83164	0.92975	0.96206	0.98356	0.96206	0.88955	0.97977	-0.22153	0.96915	0.96339	0.99892	0.90408	0.88781
* TS: Turpan sample; US: Urumqi sample
