# Supplementary material for: Effect of Climate on Volatile Metabolism in ‘Red Globe’ Grapes (Vitis vinifera L.) during Fruit Development
Source: Foods. 2022 May 16;11(10):1435. doi: 10.3390/foods11101435 (PMC9140514; doi:10.3390/foods11101435)
Supplement: Supplementary file 1 [file foods-11-01435-s001.zip › Table S8.xlsx]

## Sheet: Sheet1
Table S8. Corresponding modules of analyzed genes.
Module color	black	blue	brown	green	grey	red	turquoise	yellow
GENE ID	100232841	100232905	100232870	100232943	100241765	100217471	100232846	100232865
	100232862	100233032	100240909	100233126	100246645	100240862	100232853	100240836
	100232906	100233045	100241000	100240827	100258414	100242994	100232872	100240860
	100233002	100240884	100241572	100240897	100259841	100243072	100232879	100240984
	100233003	100241606	100241610	100241372	100266215	100244130	100232911	100240994
	100233091	100241639	100242278	100241465		100244220	100232917	100241136
	100240792	100241651	100242338	100243084		100244758	100232934	100241219
	100241452	100241895	100243222	100243137		100245181	100232942	100241253
	100242048	100243007	100244061	100243808		100246283	100232962	100241281
	100242449	100243678	100244078	100243953		100247990	100232966	100241935
	100242646	100243866	100245760	100244374		100248114	100233006	100241983
	100242940	100244155	100246297	100244608		100249839	100233027	100242170
	100243163	100244346	100246559	100245165		100250001	100233048	100242175
	100243265	100244520	100246583	100245763		100250216	100233051	100242538
	100243595	100244631	100247106	100245911		100251137	100233062	100242631
	100244038	100244941	100247380	100245945		100252747	100233083	100242821
	100244103	100244964	100247431	100246131		100252889	100233086	100243093
	100244402	100245103	100247526	100246744		100253166	100233093	100243742
	100246223	100245269	100247670	100247087		100253412	100233102	100243983
	100246736	100246308	100247795	100247563		100253444	100233109	100244679
	100248440	100246774	100247907	100247822		100254045	100233112	100244737
	100248535	100247063	100248113	100247834		100254279	100233114	100244770
	100249919	100247121	100248724	100247908		100254391	100240763	100245019
	100251399	100247150	100249284	100249110		100254983	100240803	100245533
	100251413	100247757	100249342	100249220		100255358	100240864	100245622
	100253073	100247840	100249741	100249385		100256188	100241028	100246026
	100254980	100248101	100249751	100250200		100256566	100241056	100246409
	100255220	100248134	100250388	100250360		100256795	100241065	100246754
	100255405	100248537	100250814	100250666		100259991	100241085	100247181
	100258663	100248679	100250828	100251046		100261661	100241138	100247219
	100258696	100249232	100251084	100251706		100262872	100241185	100247419
	100258873	100249254	100251218	100252896		100263160	100241199	100247673
	100259127	100249312	100251390	100254239		100263839	100241301	100248971
	100262460	100249393	100251407	100254297		100263894	100241377	100249153
	100262628	100249486	100251435	100254418		100264173	100241458	100249300
	100263322	100249659	100251581	100255607		100264273	100241491	100249331
	100263541	100250535	100251688	100255991		100264747	100241544	100249518
	100263637	100250853	100251745	100256406		100264844	100241575	100249937
	100263992	100250869	100251929	100256698		100265368	100241577	100250396
	100265516	100250998	100251998	100257805		100265834	100241597	100250883
	100265988	100251075	100252049	100257846		100266095	100241637	100251039
	100267121	100251100	100252634	100257925		100266698	100241707	100252101
	100267287	100251144	100252717	100258183		100267145	100241745	100252779
	100267584	100251158	100253083	100258655		100267695	100241753	100254096
	100267902	100251211	100253142	100258695		100267810	100241784	100254233
	100268134	100251788	100253189	100258702		100268049	100241814	100254252
	100853785	100251967	100253306	100258771		100852886	100241839	100254364
	100854106	100252277	100253492	100259000		100853406	100241856	100255578
	100854520	100252463	100254004	100259078		100853526	100241887	100256196
	100855257	100252516	100254397	100259216		100853590	100241912	100256849
	100855260	100252878	100254716	100259623		100853675	100242017	100257736
	104880924	100252985	100254836	100259946		100853680	100242028	100257932
	104881904	100253000	100254910	100260170		100853745	100242036	100258410
	104882465	100253027	100255325	100260250		100853820	100242118	100258792
		100253046	100255711	100260564		100855299	100242128	100259777
		100253071	100255958	100260772		100855361	100242133	100260227
		100253113	100256520	100260905		104879582	100242154	100261109
		100253821	100257144	100262131		109121404	100242167	100261385
		100254037	100257716	100262406		109121432	100242179	100261497
		100254372	100258180	100262963			100242257	100261518
		100254818	100258257	100263051			100242272	100261743
		100255498	100259041	100263768			100242290	100262356
		100255502	100259050	100264239			100242322	100262364
		100255535	100259927	100264774			100242323	100263064
		100255955	100259984	100266045			100242384	100263212
		100256290	100260124	100267231			100242414	100263537
		100256573	100260276	100267378			100242429	100263762
		100256593	100260651	100267841			100242476	100263817
		100256628	100261069	100268054			100242506	100263995
		100256719	100261307	100854029			100242564	100264738
		100256780	100261471	100854033			100242737	100264773
		100257229	100261619	100854716			100242786	100265028
		100257469	100261982	100855401			100242832	100265103
		100257557	100262343	104877551			100242977	100265708
		100257672	100263033	104877592			100242982	100265712
		100257750	100264117	104878671			100243049	100266384
		100258031	100264250	104878918			100243201	100266707
		100258104	100264404	104879540			100243307	100267164
		100258158	100264552	104879728			100243329	100852723
		100258526	100264875	104879994			100243519	100852777
		100258759	100265355	104881563			100243645	100852953
		100258920	100265432	104882517			100243668	100854120
		100259201	100265737	109121990			100243675	100855221
		100259215	100265777	109122626			100243757	100855393
		100259275	100266006				100243785	104880304
		100259329	100266341				100243827	104880884
		100259386	100266419				100243842	104880977
		100259463	100266652				100243854	104881300
		100259470	100266747				100243943
		100259589	100266813				100243965
		100259982	100266896				100244014
		100260282	100267223				100244032
		100260288	100267418				100244046
		100260786	100267575				100244128
		100260820	100852434				100244149
		100261023	100854874				100244163
		100261078	100855046				100244240
		100261242	104877642				100244274
		100262328	104879489				100244283
		100262361	104879547				100244332
		100262403	104880391				100244353
		100263026	104880466				100244376
		100263039	104881373				100244467
		100263065	104881379				100244488
		100263179	104882760				100244514
		100263252	109121948				100244525
		100263360	109122214				100244609
		100263403	109122310				100244704
		100263533					100244850
		100263570					100244905
		100263626					100244962
		100263636					100245004
		100263786					100245028
		100263837					100245036
		100263949					100245075
		100264272					100245127
		100264446					100245132
		100264790					100245139
		100264834					100245212
		100265026					100245214
		100265045					100245229
		100265188					100245260
		100265489					100245282
		100265499					100245304
		100265597					100245348
		100265661					100245433
		100265697					100245440
		100265876					100245471
		100265990					100245479
		100266396					100245483
		100266481					100245527
		100266622					100245595
		100266640					100245600
		100266643					100245706
		100266843					100245740
		100266999					100245801
		100267301					100245827
		100267499					100245840
		100267554					100245859
		100267567					100245884
		100267772					100245885
		100267784					100245897
		100267818					100245904
		100267819					100245905
		100268021					100245906
		100268147					100245914
		100852802					100245950
		100853522					100246006
		100853747					100246023
		100853750					100246027
		100854522					100246094
		100854597					100246166
		100854884					100246179
		100854976					100246196
		100854994					100246227
		100855331					100246382
		104878429					100246418
		104878687					100246433
		104879229					100246482
		104879662					100246497
		104880123					100246512
		104880149					100246540
		104880827					100246547
		104881245					100246611
		104881753					100246634
		104881928					100246662
		109121456					100246740
		109122015					100246932
							100246938
							100246945
							100246982
							100247001
							100247026
							100247044
							100247045
							100247060
							100247311
							100247336
							100247349
							100247421
							100247440
							100247488
							100247495
							100247528
							100247557
							100247559
							100247675
							100247690
							100247693
							100247714
							100247733
							100247747
							100247765
							100247770
							100247789
							100247802
							100247833
							100247858
							100247951
							100247965
							100247995
							100248011
							100248102
							100248235
							100248271
							100248302
							100248315
							100248328
							100248423
							100248430
							100248459
							100248471
							100248474
							100248484
							100248494
							100248622
							100248643
							100248651
							100248682
							100248709
							100248717
							100248812
							100248834
							100248895
							100249006
							100249018
							100249066
							100249097
							100249156
							100249226
							100249245
							100249279
							100249283
							100249324
							100249419
							100249474
							100249533
							100249578
							100249672
							100249719
							100249746
							100249779
							100249814
							100249831
							100250236
							100250244
							100250300
							100250305
							100250354
							100250410
							100250437
							100250461
							100250504
							100250543
							100250571
							100250578
							100250612
							100250615
							100250619
							100250664
							100250698
							100250741
							100250782
							100250812
							100250890
							100250924
							100250939
							100250967
							100251002
							100251167
							100251233
							100251235
							100251241
							100251303
							100251398
							100251494
							100251616
							100251671
							100251676
							100251711
							100251777
							100251783
							100251794
							100251837
							100251862
							100251957
							100251973
							100251985
							100252004
							100252037
							100252054
							100252066
							100252098
							100252129
							100252136
							100252158
							100252168
							100252174
							100252177
							100252212
							100252291
							100252351
							100252389
							100252432
							100252495
							100252547
							100252623
							100252695
							100252738
							100252759
							100252820
							100252844
							100252859
							100252949
							100252964
							100252996
							100253026
							100253030
							100253072
							100253085
							100253093
							100253196
							100253218
							100253275
							100253324
							100253346
							100253356
							100253378
							100253418
							100253436
							100253486
							100253493
							100253496
							100253548
							100253553
							100253641
							100253660
							100253669
							100253748
							100253773
							100253842
							100253895
							100253943
							100253967
							100253970
							100253991
							100254006
							100254086
							100254212
							100254237
							100254327
							100254375
							100254405
							100254571
							100254587
							100254640
							100254683
							100254733
							100254799
							100254856
							100254987
							100255327
							100255381
							100255398
							100255480
							100255485
							100255533
							100255573
							100255642
							100255713
							100255731
							100255742
							100255862
							100255863
							100255866
							100255873
							100255881
							100255939
							100255943
							100255952
							100256034
							100256069
							100256084
							100256130
							100256209
							100256223
							100256432
							100256457
							100256465
							100256474
							100256486
							100256515
							100256534
							100256601
							100256651
							100256653
							100256656
							100256684
							100256700
							100256715
							100256746
							100256776
							100256846
							100256859
							100256873
							100256937
							100256970
							100257005
							100257029
							100257041
							100257053
							100257213
							100257253
							100257332
							100257333
							100257397
							100257444
							100257506
							100257534
							100257595
							100257616
							100257630
							100257648
							100257740
							100257743
							100257784
							100257810
							100257828
							100257867
							100257903
							100257908
							100257952
							100258060
							100258085
							100258106
							100258141
							100258232
							100258264
							100258356
							100258380
							100258391
							100258486
							100258492
							100258504
							100258555
							100258559
							100258609
							100258629
							100258692
							100258732
							100258760
							100258773
							100258799
							100258838
							100258861
							100258862
							100258874
							100258946
							100258966
							100258992
							100259060
							100259085
							100259145
							100259194
							100259199
							100259213
							100259258
							100259291
							100259312
							100259317
							100259323
							100259363
							100259374
							100259380
							100259468
							100259502
							100259548
							100259559
							100259567
							100259585
							100259738
							100259742
							100259799
							100259921
							100260066
							100260104
							100260142
							100260148
							100260154
							100260158
							100260215
							100260321
							100260421
							100260432
							100260458
							100260517
							100260528
							100260532
							100260571
							100260599
							100260625
							100260655
							100260656
							100260659
							100260747
							100260805
							100260891
							100260903
							100260907
							100261077
							100261157
							100261203
							100261279
							100261299
							100261327
							100261336
							100261354
							100261475
							100261507
							100261545
							100261582
							100261583
							100261608
							100261690
							100261754
							100261829
							100261839
							100261985
							100262011
							100262023
							100262068
							100262082
							100262101
							100262206
							100262223
							100262224
							100262227
							100262451
							100262516
							100262547
							100262563
							100262614
							100262657
							100262707
							100262718
							100262729
							100262758
							100262762
							100262782
							100262788
							100262849
							100263042
							100263109
							100263174
							100263206
							100263254
							100263272
							100263275
							100263311
							100263313
							100263324
							100263355
							100263357
							100263470
							100263588
							100263590
							100263614
							100263698
							100263791
							100263804
							100263879
							100263951
							100263979
							100263996
							100264200
							100264214
							100264271
							100264279
							100264342
							100264507
							100264520
							100264533
							100264556
							100264557
							100264581
							100264583
							100264612
							100264647
							100264662
							100264675
							100264683
							100264783
							100264828
							100264963
							100264992
							100265051
							100265052
							100265082
							100265200
							100265219
							100265247
							100265304
							100265313
							100265354
							100265360
							100265535
							100265575
							100265586
							100265615
							100265620
							100265907
							100266028
							100266034
							100266086
							100266131
							100266147
							100266206
							100266263
							100266268
							100266306
							100266322
							100266391
							100266400
							100266415
							100266440
							100266451
							100266471
							100266479
							100266585
							100266675
							100266738
							100266751
							100266865
							100266902
							100266912
							100267022
							100267073
							100267124
							100267185
							100267240
							100267393
							100267442
							100267469
							100267550
							100267572
							100267612
							100267676
							100267678
							100267760
							100267788
							100267804
							100267811
							100267825
							100267888
							100267897
							100268056
							100268097
							100268107
							100268122
							100268126
							100852504
							100852555
							100852645
							100852659
							100852822
							100852835
							100852860
							100852885
							100852930
							100852957
							100852969
							100853075
							100853105
							100853107
							100853145
							100853165
							100853380
							100853452
							100853501
							100853635
							100853647
							100853652
							100853656
							100853861
							100853897
							100853941
							100854071
							100854121
							100854247
							100854348
							100854480
							100854531
							100854586
							100854621
							100854643
							100854646
							100854725
							100854828
							100855128
							100855129
							100855230
							104877289
							104877300
							104877442
							104877499
							104877973
							104878923
							104878975
							104879730
							104879776
							104879792
							104880620
							104880688
							104880693
							104881029
							104881366
							104881400
							104881423
							104881462
							104881677
							104881922
							104882692
							104882737
							109121390
							109121396
							109121423
							109121428
							109121544
							109121674
							109122358
							109122656
							109122894
							109124071
